# Supplementary material
Source: PubMed Central journal article supplement (PMC3070195)

# Chemoenzymatic Syntheses and Anti-HIV-1 Activity of Glucose-Nucleoside Conjugates as Prodrugs

*Tatiana Rodríguez-Pérez,<sup>†</sup> Susana Fernández,<sup>†</sup> Yogesh S. Sanghvi,<sup>‡</sup> Raymond F. Schinazi,<sup>§</sup> Vicente*

*Gotor<sup>†,\*</sup> and Miguel Ferrero<sup>†,\*</sup>*

<sup>†</sup>Departamento de Química Orgánica e Inorgánica and Instituto Universitario de Biotecnología de Asturias, Universidad de Oviedo, 33006-Oviedo (Asturias), Spain

<sup>‡</sup>Rasayan Inc., 2802 Crystal Ridge Road, Encinitas, CA 92024-6615, USA.

<sup>§</sup>Emory University School of Medicine/Veterans Affairs Medical Center, Decatur, Georgia 30033, USA.

## **ELECTRONIC SUPPLEMENTARY INFORMATION** (page 1 of 153 pages)

### **Contents:**

Copies of <sup>1</sup>H, <sup>13</sup>C, DEPT, and some 2D NMR spectra of compounds **3**, **5**, **7**, **9**, and **10**:

- |                                          |                                          |
|------------------------------------------|------------------------------------------|
| - <sup>1</sup> H NMR of <b>7</b> (S4)    | - <sup>1</sup> H NMR of <b>8d</b> (S16)  |
| - <sup>13</sup> C NMR of <b>7</b> (S5)   | - <sup>13</sup> C NMR of <b>8d</b> (S17) |
| - DEPT NMR of <b>7</b> (S6)              | - DEPT NMR of <b>8d</b> (S18)            |
| - <sup>31</sup> P NMR of <b>7</b> (S7)   | - <sup>1</sup> H NMR of <b>8f</b> (S19)  |
| - COSY of <b>7</b> (S8)                  | - <sup>13</sup> C NMR of <b>8f</b> (S20) |
| - HSQC of <b>7</b> (S9)                  | - DEPT NMR of <b>8f</b> (S21)            |
| - HMBC of <b>7</b> (S10)                 | - <sup>1</sup> H NMR of <b>8g</b> (S22)  |
| - NOESY of <b>7</b> (S11)                | - <sup>13</sup> C NMR of <b>8g</b> (S23) |
| - <sup>1</sup> H NMR of <b>8c</b> (S12)  | - DEPT NMR of <b>8g</b> (S24)            |
| - <sup>13</sup> C NMR of <b>8c</b> (S13) | - <sup>1</sup> H NMR of <b>8h</b> (S25)  |
| - DEPT NMR of <b>8c</b> (S14)            | - <sup>13</sup> C NMR of <b>8h</b> (S26) |
| - COSY of <b>8c</b> (S15)                | - DEPT NMR of <b>8h</b> (S27)            |

- <sup>1</sup>H NMR of **8i** (S28)
- <sup>13</sup>C NMR of **8i** (S29)
- DEPT NMR of **8i** (S30)
- <sup>1</sup>H NMR of **9a** (S31)
- <sup>13</sup>C NMR of **9a** (S31)
- DEPT NMR of **9a** (S33)
- <sup>31</sup>P NMR of **9a** (S34)
- <sup>1</sup>H NMR of **9b** (S35)
- <sup>13</sup>C NMR of **9b** (S36)
- DEPT NMR of **9b** (S37)
- <sup>31</sup>P NMR of **9b** (S38)
- COSY of **9b** (S39)
- HSQC of **9b** (S40)
- HMBC of **9b** (S41)
- <sup>1</sup>H NMR of **9c** (S42)
- <sup>13</sup>C NMR of **9c** (S43)
- DEPT NMR of **9c** (S44)
- <sup>31</sup>P NMR of **9c** (S45)
- COSY of **9c** (S46)
- HSQC of **9c** (S47)
- HMBC of **9c** (S48)
- <sup>1</sup>H NMR of **9d** (S49)
- <sup>13</sup>C NMR of **9d** (S50)
- DEPT NMR of **9d** (S51)
- <sup>31</sup>P NMR of **9d** (S52)
- COSY of **9d** (S53)
- HSQC of **9d** (S54)
- HMBC of **9d** (S55)
- <sup>1</sup>H NMR of **9e** (S56)
- <sup>13</sup>C NMR of **9e** (S57)
- DEPT NMR of **9e** (S58)
- <sup>31</sup>P NMR of **9e** (S59)
- COSY of **9e** (S60)
- HSQC of **9e** (S61)
- HMBC of **9e** (S62)
- <sup>1</sup>H NMR of **9f** (S63)
- <sup>13</sup>C NMR of **9f** (S64)
- DEPT NMR of **9f** (S65)
- <sup>31</sup>P NMR of **9f** (S66)
- <sup>1</sup>H NMR of **9g** (S67)
- <sup>13</sup>C NMR of **9g** (S68)
- DEPT NMR of **9g** (S69)
- <sup>31</sup>P NMR of **9g** (S70)
- COSY of **9g** (S71)
- HSQC of **9g** (S72)
- HMBC of **9g** (S73)
- <sup>1</sup>H NMR of **9h** (S74)
- <sup>13</sup>C NMR of **9h** (S75)
- DEPT NMR of **9h** (S76)
- <sup>31</sup>P NMR of **9h** (S77)
- COSY of **9h** (S78)
- HSQC of **9h** (S79)
- HMBC of **9h** (S80)
- <sup>1</sup>H NMR of **9i** (S81)
- <sup>13</sup>C NMR of **9i** (S82)
- DEPT NMR of **9i** (S83)
- <sup>31</sup>P NMR of **9i** (S84)
- HSQC of **9i** (S85)
- HMBC of **9i** (S86)
- NOESY of **9i** (S87)
- <sup>1</sup>H NMR of **10a** (S88)
- <sup>13</sup>C NMR of **10a** (S89)
- DEPT NMR of **10a** (S90)
- <sup>31</sup>P NMR of **10a** (S91)
- COSY of **10a** (S92)
- <sup>1</sup>H NMR of **10b** (S93)
- <sup>13</sup>C NMR of **10b** (S94)
- DEPT NMR of **10b** (S95)
- <sup>31</sup>P NMR of **10b** (S96)
- COSY of **10b** (S97)

- HSQC of **10b** (S98)
- <sup>1</sup>H NMR of **10c** (S99)
- <sup>13</sup>C NMR of **10c** (S100)
- DEPT NMR of **10c** (S101)
- <sup>31</sup>P NMR of **10c** (S102)
- COSY of **10c** (S103)
- <sup>1</sup>H NMR of **10d** (S104)
- <sup>13</sup>C NMR of **10d** (S105)
- DEPT NMR of **10d** (S106)
- <sup>31</sup>P NMR of **10d** (S107)
- COSY of **10d** (S108)
- <sup>1</sup>H NMR of **10e** (S109)
- <sup>13</sup>C NMR of **10e** (S110)
- DEPT NMR of **10e** (S111)
- <sup>31</sup>P NMR of **10e** (S112)
- COSY of **10e** (S113)
- <sup>1</sup>H NMR of **10f** (S114)
- <sup>13</sup>C NMR of **10f** (S115)
- DEPT NMR of **10f** (S116)
- <sup>31</sup>P NMR of **10e** (S117)
- COSY of **10f** (S118)
- <sup>1</sup>H NMR of **10g** (S119)
- <sup>13</sup>C NMR of **10g** (S120)
- DEPT NMR of **10g** (S121)
- <sup>31</sup>P NMR of **10g** (S122)
- <sup>1</sup>H NMR of **10h** (S123)
- <sup>13</sup>C NMR of **10h** (S124)
- DEPT NMR of **10h** (S125)
- <sup>31</sup>P NMR of **10h** (S126)
- COSY of **10h** (S127)
- <sup>1</sup>H NMR of **10i** (S128)
- <sup>13</sup>C NMR of **10i** (S129)
- DEPT NMR of **10i** (S130)
- <sup>31</sup>P NMR of **10i** (S131)
- COSY of **10i** (S132)
- <sup>1</sup>H NMR of **14** (S133)
- <sup>13</sup>C NMR of **14** (S134)
- DEPT NMR of **14** (S135)
- <sup>1</sup>H NMR of **15** (S136)
- <sup>13</sup>C NMR of **15** (S137)
- DEPT NMR of **15** (S138)
- <sup>1</sup>H NMR of **17** (S139)
- <sup>13</sup>C NMR of **17** (S140)
- DEPT NMR of **17** (S141)
- <sup>1</sup>H NMR of **18** (S142)
- <sup>13</sup>C NMR of **18** (S143)
- DEPT NMR of **18** (S144)
- <sup>1</sup>H NMR of **19** (S145)
- <sup>13</sup>C NMR of **19** (S146)
- DEPT NMR of **19** (S147)
- <sup>1</sup>H NMR of **21** (S148)
- <sup>13</sup>C NMR of **21** (S149)
- DEPT NMR of **21** (S150)
- <sup>1</sup>H NMR of **22** (S151)
- <sup>13</sup>C NMR of **22** (S152)
- DEPT NMR of **22** (S153)

2-Cyanoethyl-*N,N*-diisopropyl-(1,2,3,4-tetra-*O*-acetyl- $\alpha$ -D-glucopyranoside-6-yl)phosphoramidite (7)

$^1\text{H-RMN}$  ( $\text{CDCl}_3$ , 600 MHz)

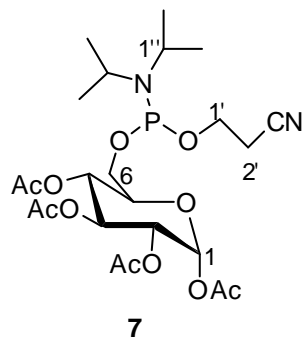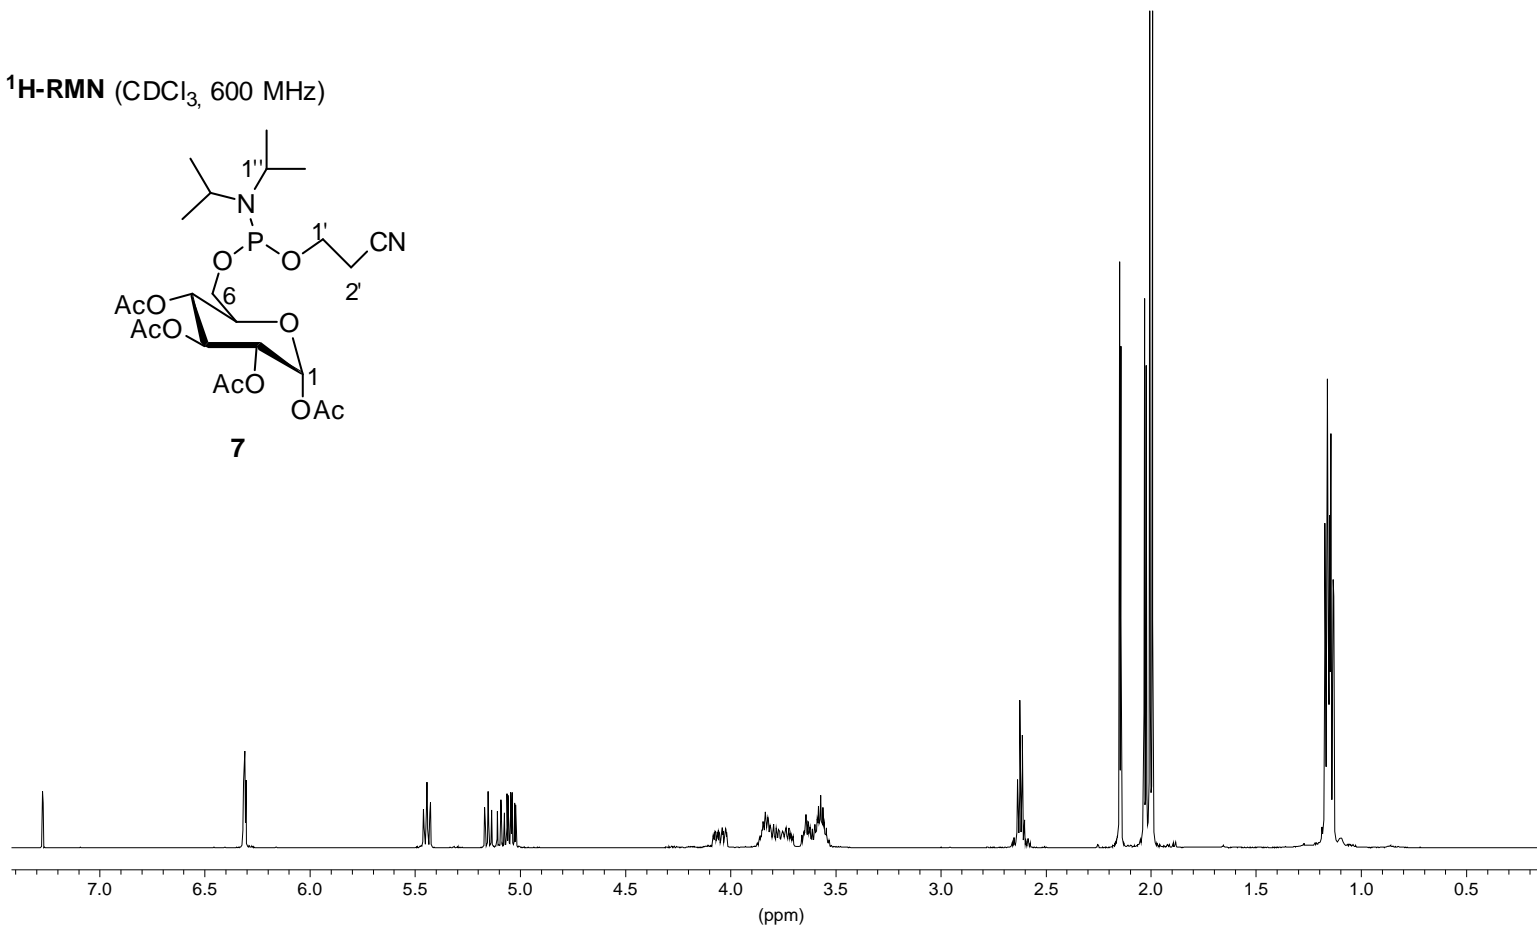

**2-Cyanoethyl-*N,N*-diisopropyl-(1,2,3,4-tetra-*O*-acetyl- $\alpha$ -D-glucopyranoside-6-yl)phosphoramidite (7)**

$^{13}\text{C}$ -RMN ( $\text{CDCl}_3$ , 150.5 MHz)

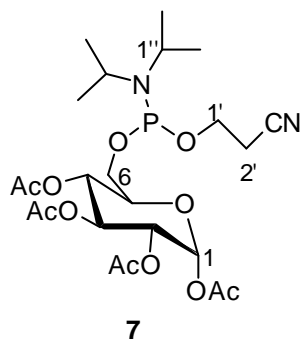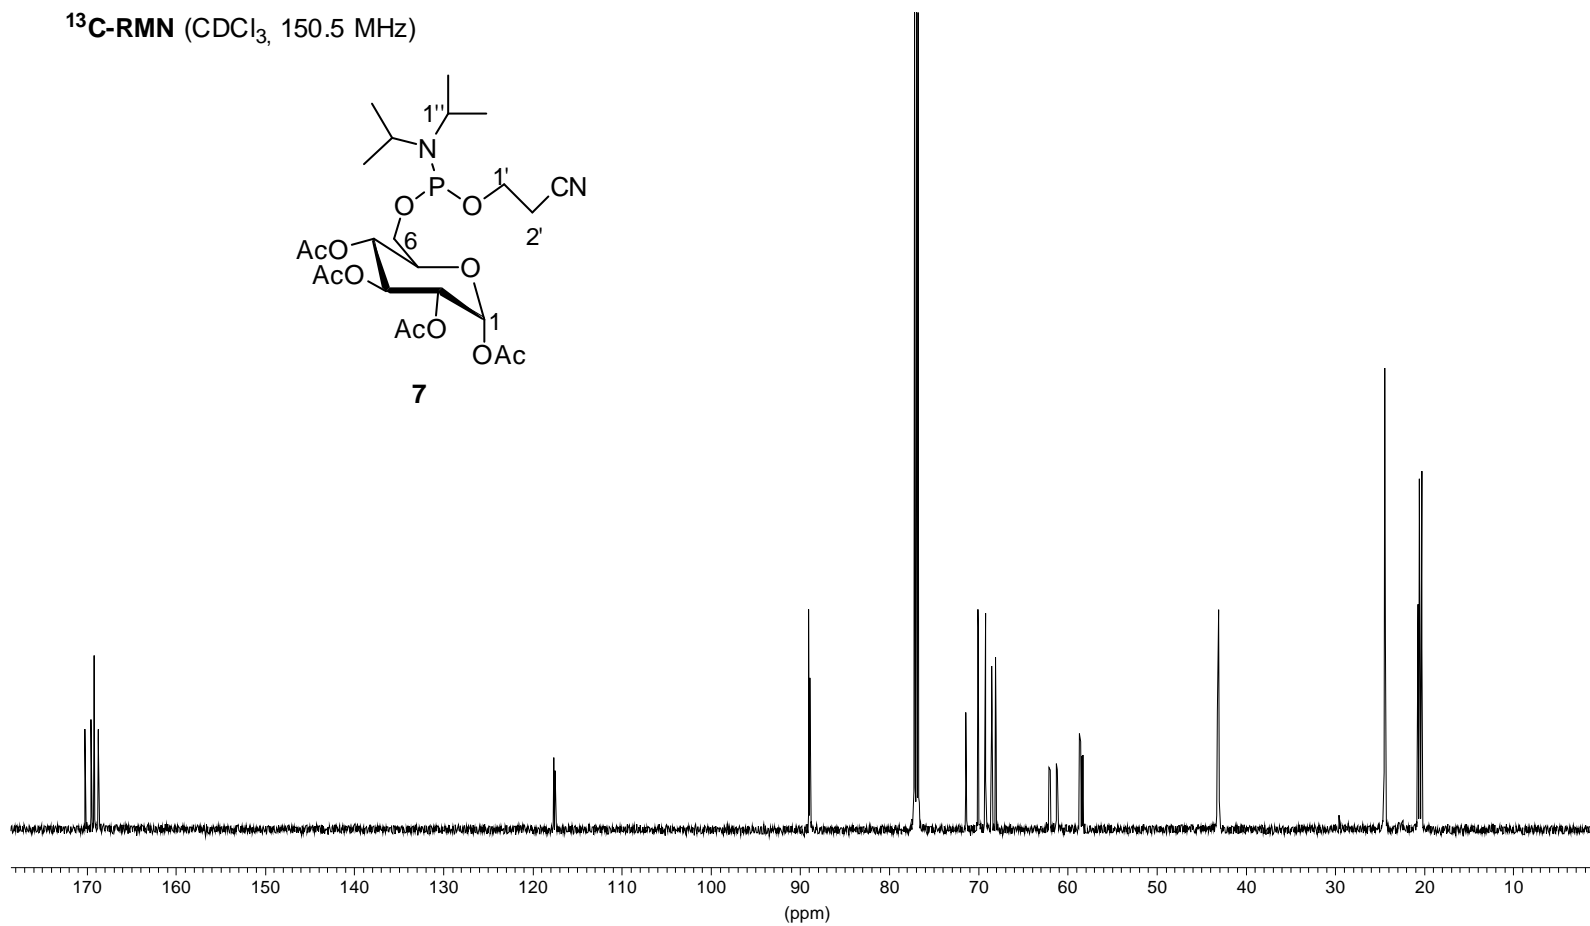

**2-Cyanoethyl-*N,N*-diisopropyl-(1,2,3,4-tetra-*O*-acetyl- $\alpha$ -D-glucopyranoside-6-yl)phosphoramidite (7)**

DEPT (CDCl<sub>3</sub>, 150.5 MHz)

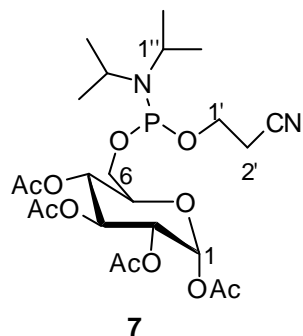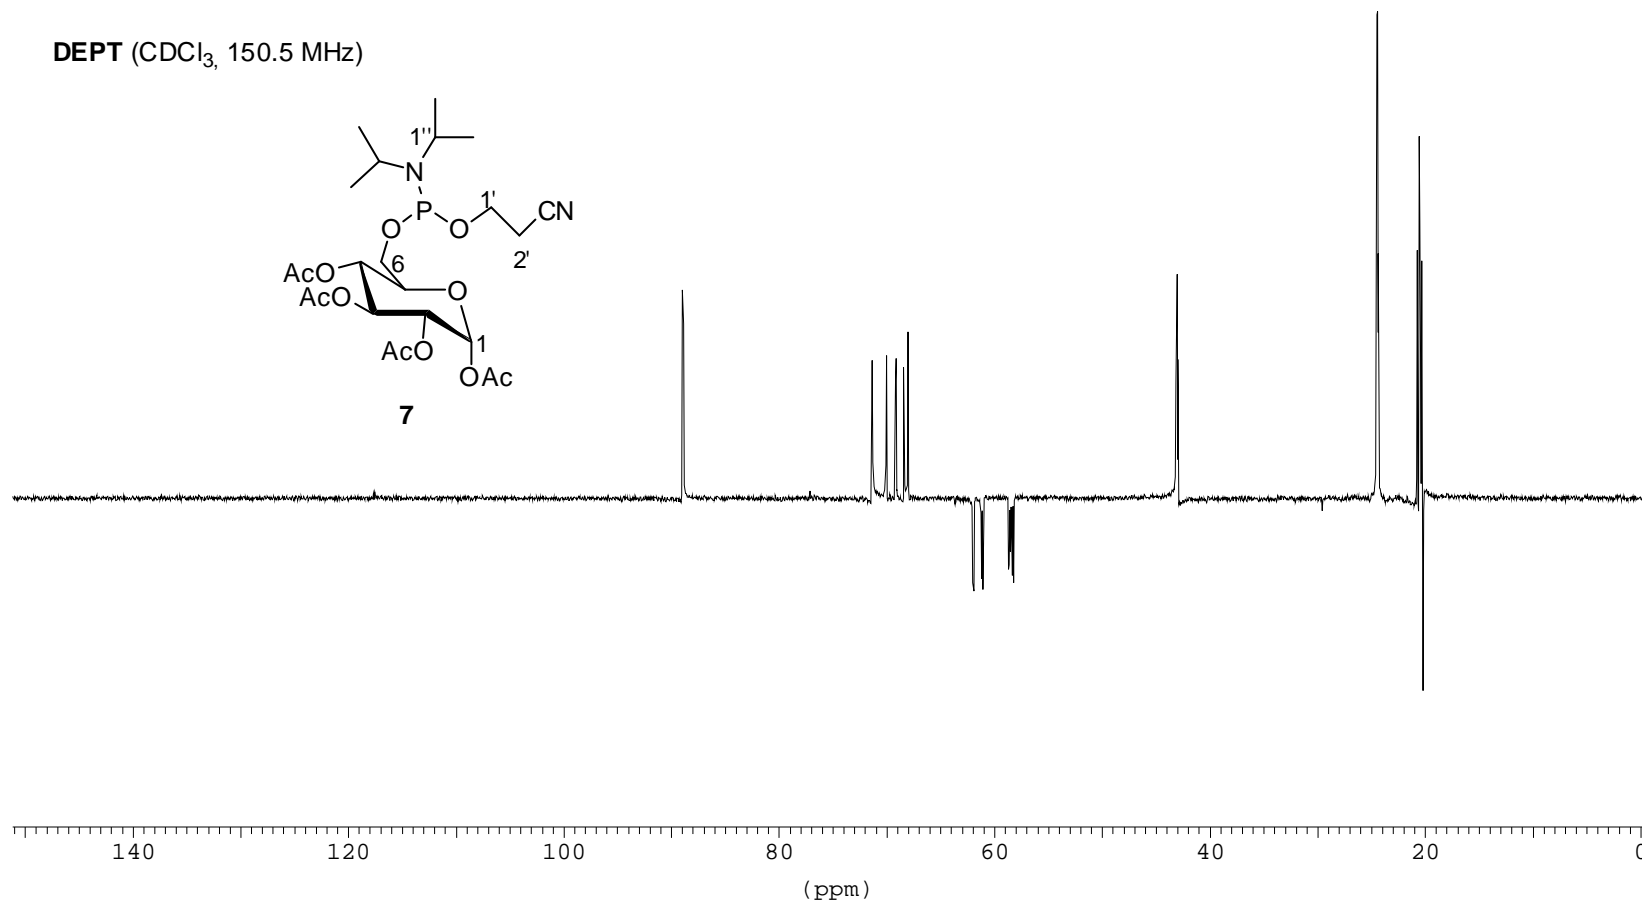

2-Cyanoethyl-*N,N*-diisopropyl-(1,2,3,4-tetra-*O*-acetyl- $\alpha$ -D-glucopyranoside-6-yl)phosphoramidite (7)

$^{31}\text{P}$ -RMN ( $\text{CDCl}_3$ , 242.9 MHz)

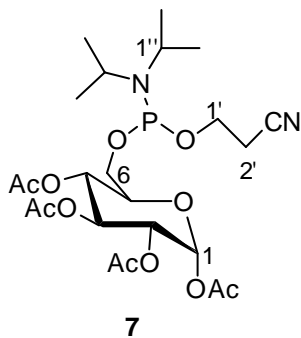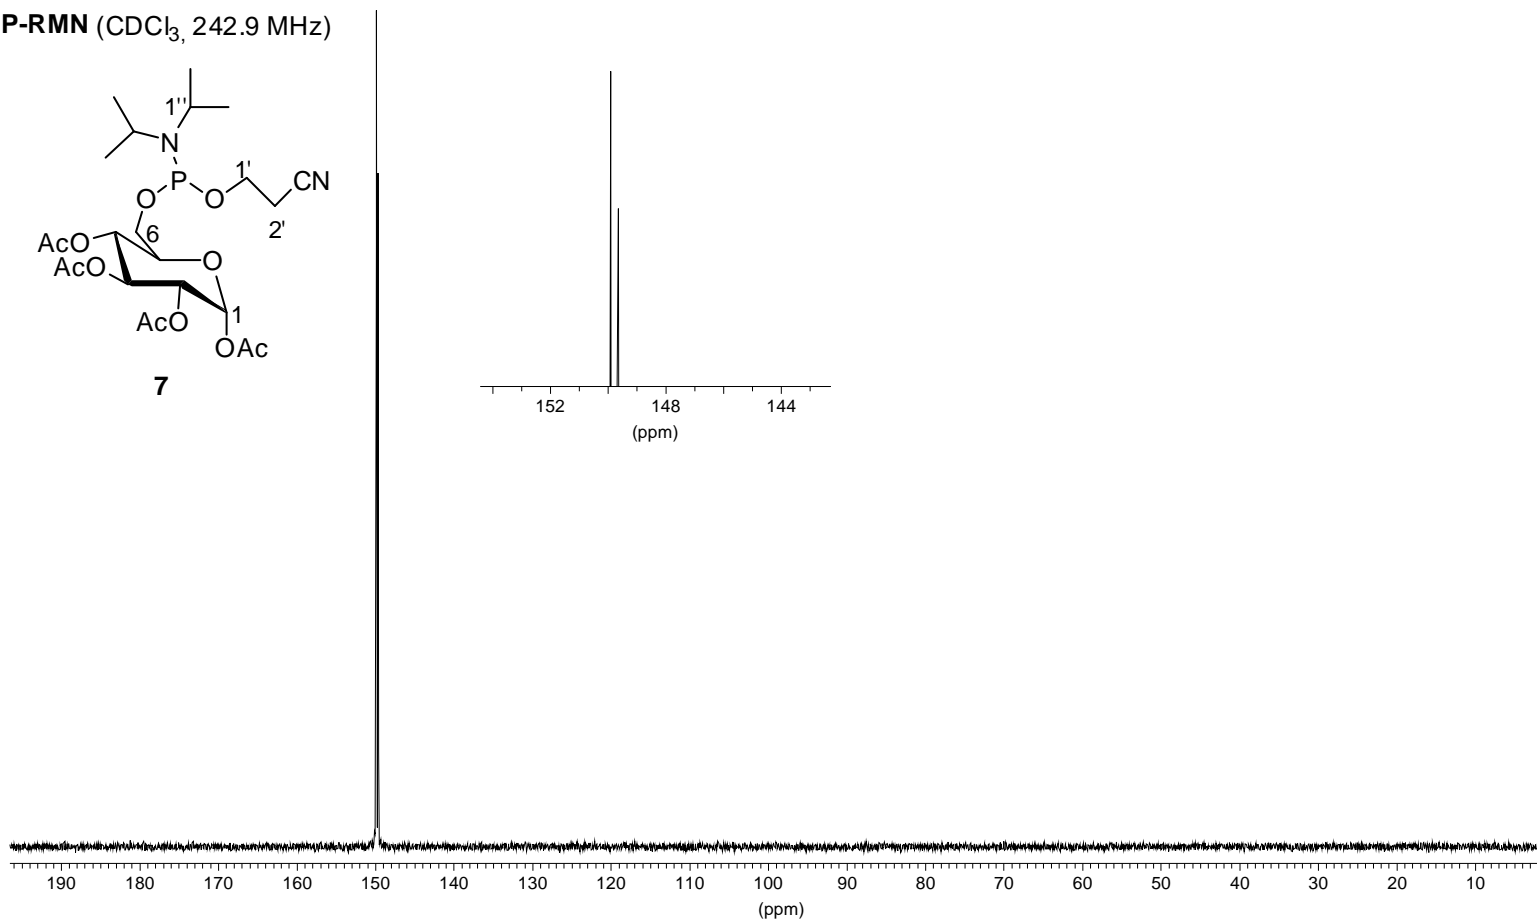

2-Cyanoethyl-*N,N*-diisopropyl-(1,2,3,4-tetra-*O*-acetyl- $\alpha$ -D-glucopyranoside-6-yl)phosphoramidite (7)

COSY (CDCl<sub>3</sub>, 600 MHz)

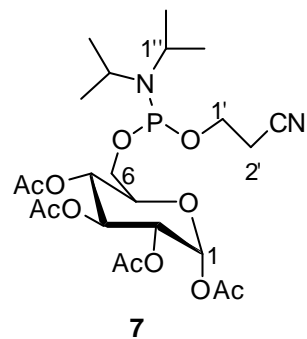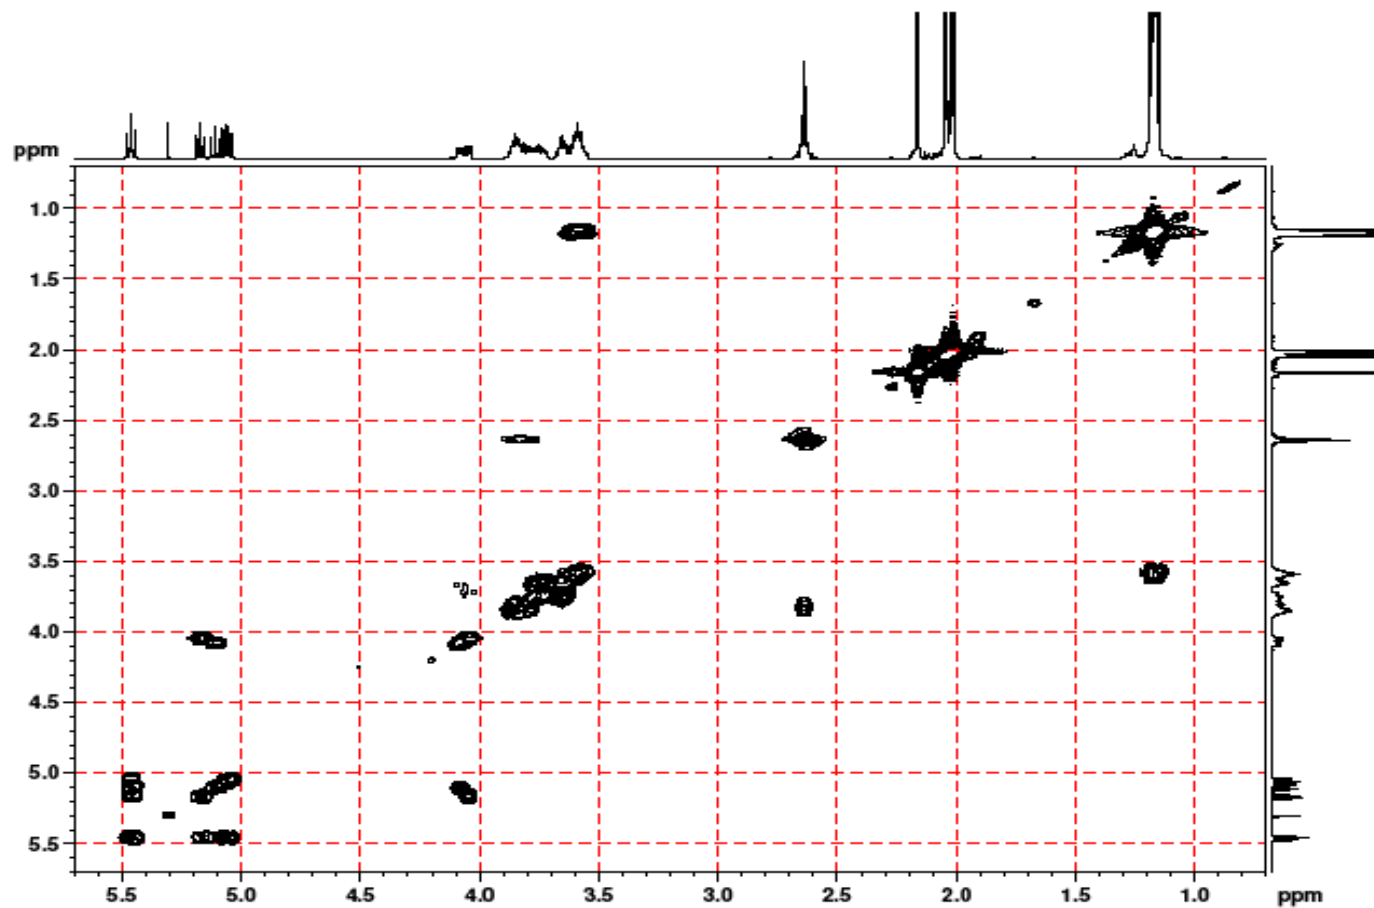



2-Cyanoethyl-*N,N*-diisopropyl-(1,2,3,4-tetra-*O*-acetyl- $\alpha$ -D-glucopyranoside-6-yl)phosphoramidite (7)

HSQC (CDCl<sub>3</sub>, 600 MHz)

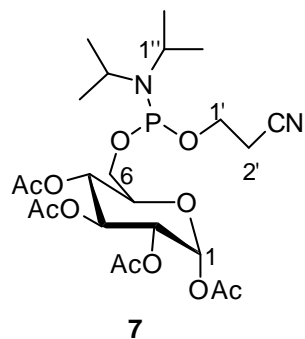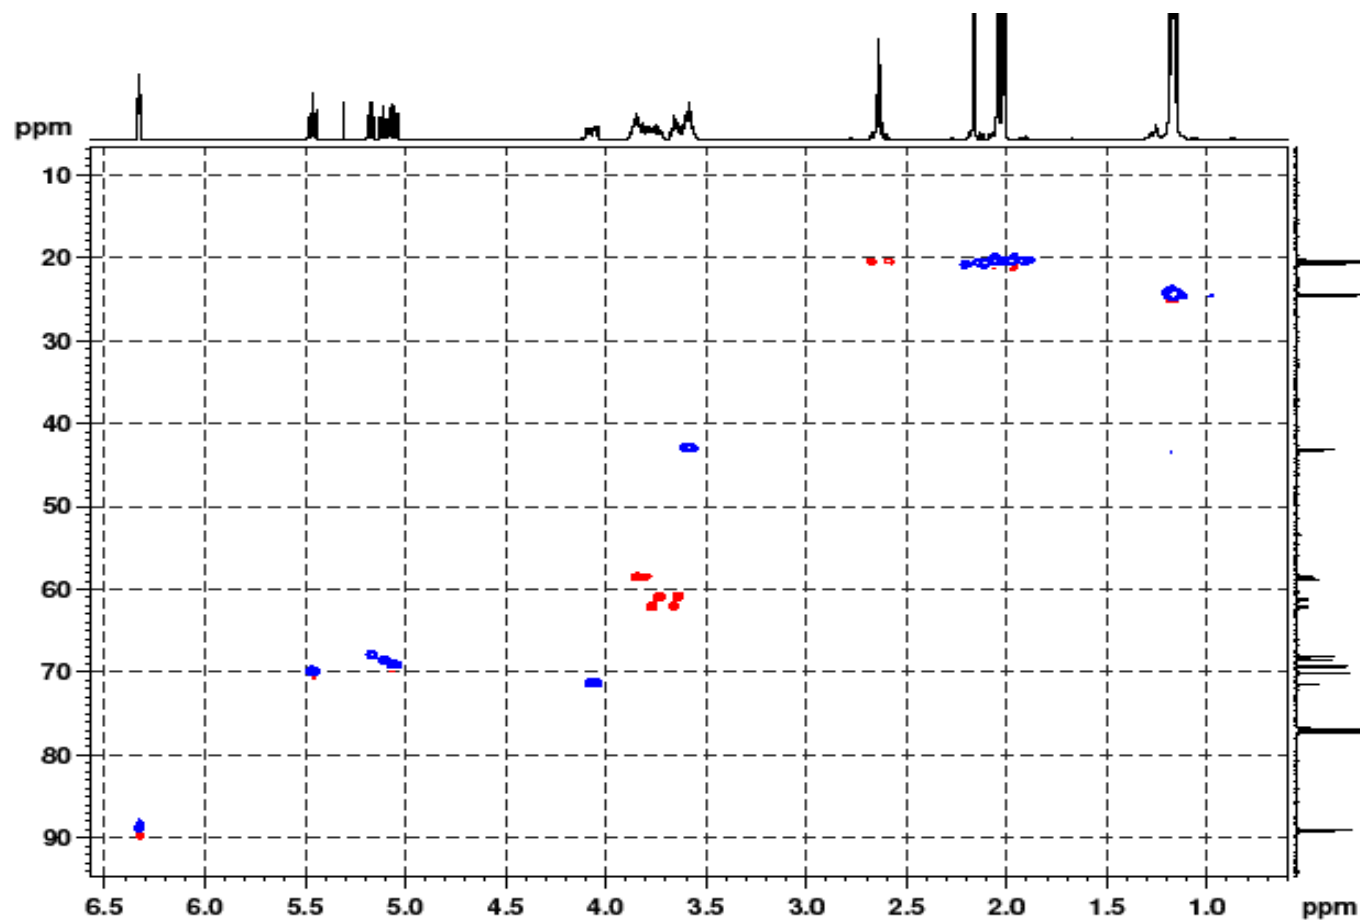

2-Cyanoethyl-*N,N*-diisopropyl-(1,2,3,4-tetra-*O*-acetyl- $\alpha$ -D-glucopyranoside-6-yl)phosphoramidite (7)

HMBC (CDCl<sub>3</sub>, 600 MHz)

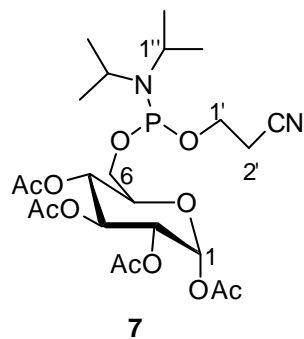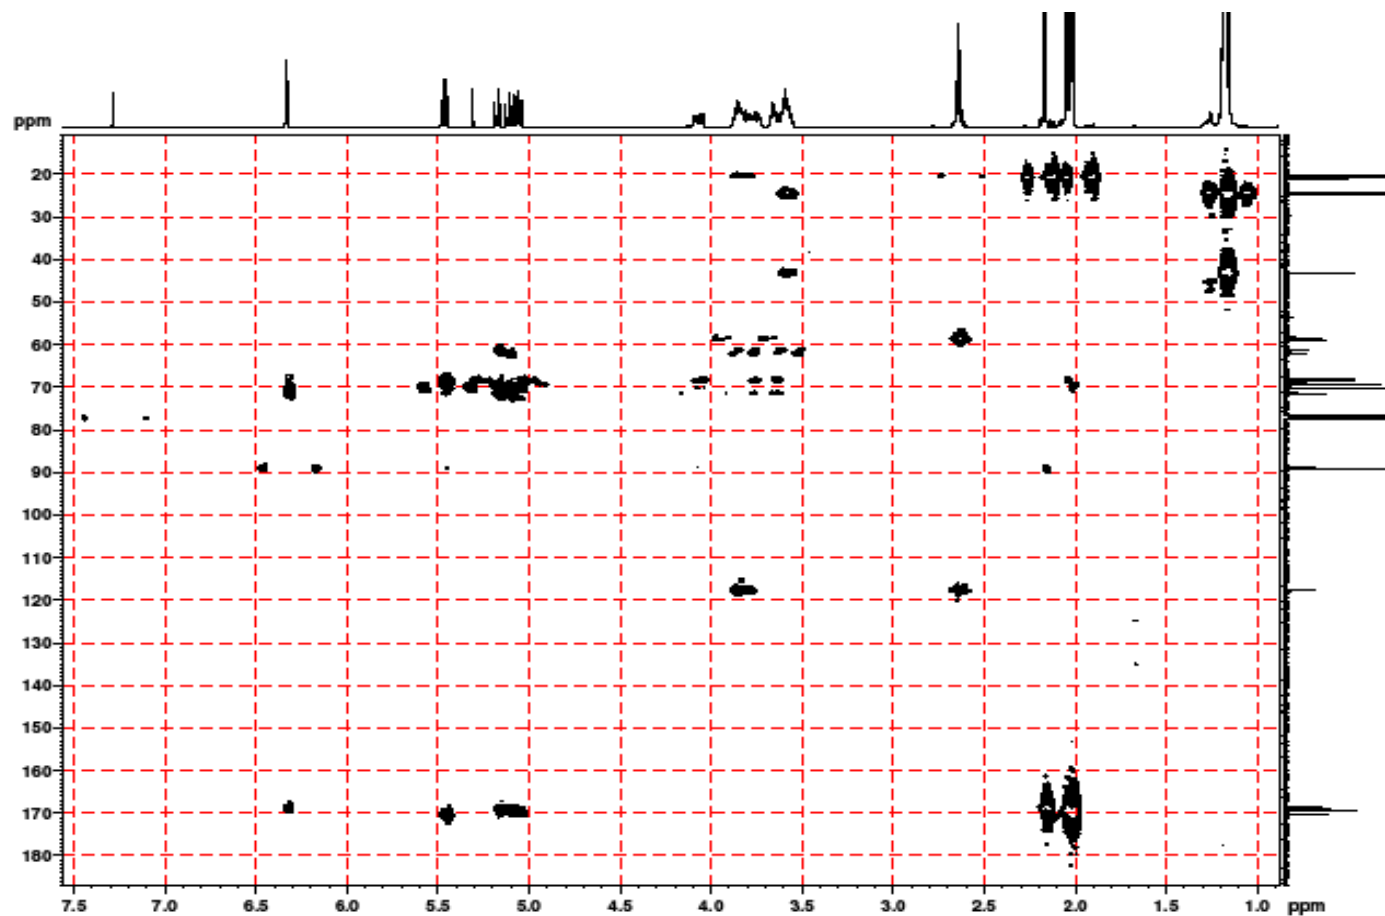

2-Cyanoethyl-*N,N*-diisopropyl-(1,2,3,4-tetra-*O*-acetyl- $\alpha$ -D-glucopyranoside-6-yl)phosphoramidite (7)

NOESY (CDCl<sub>3</sub>, 600 MHz)

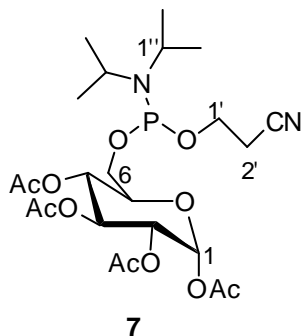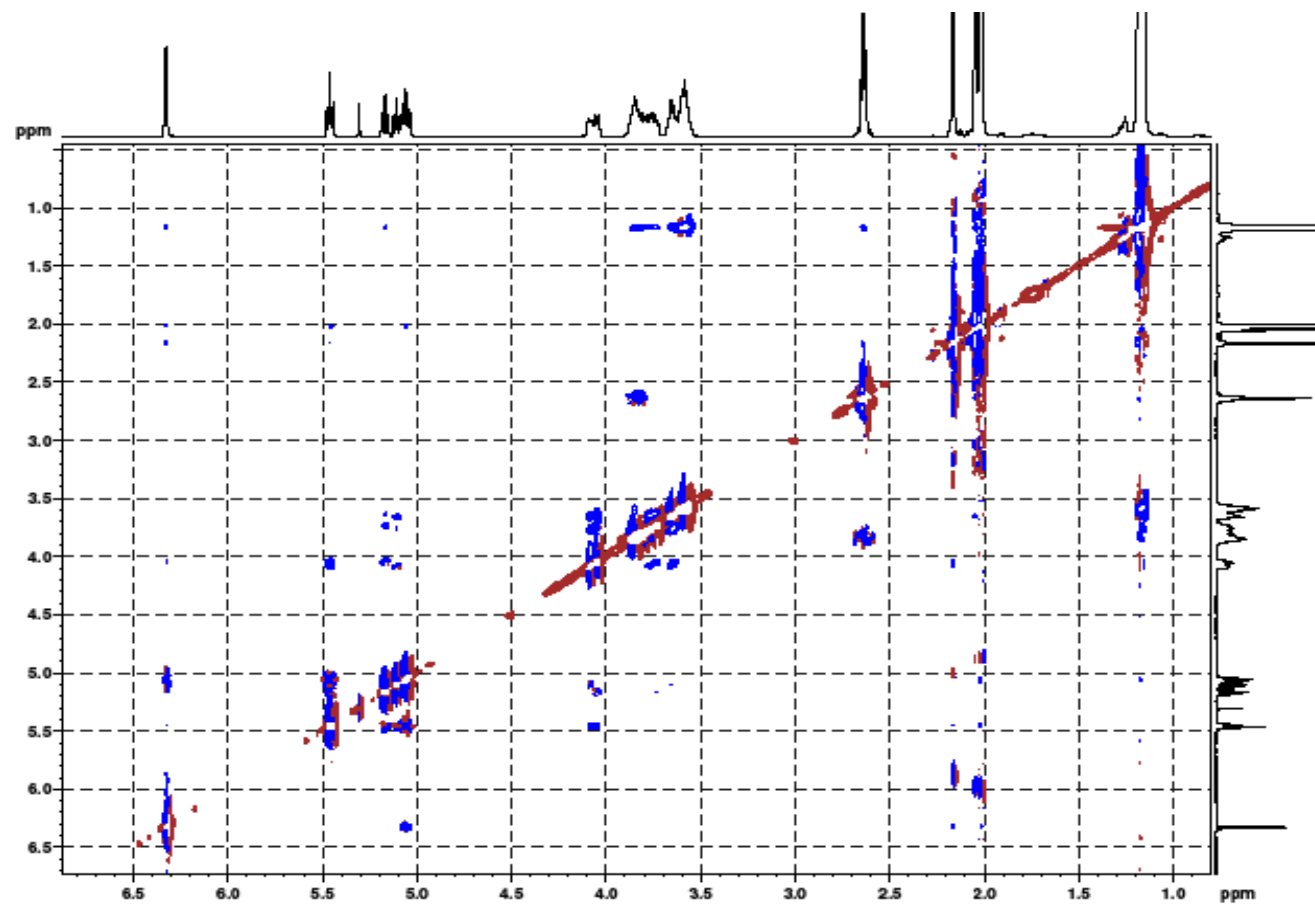

**5-Iodo-3'-O-levulinyl-2'-deoxyuridine (8c)**

<sup>1</sup>H-RMN (MeOH-*d*<sub>4</sub>, 300 MHz)

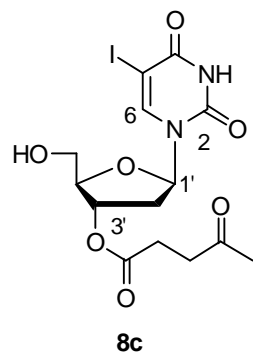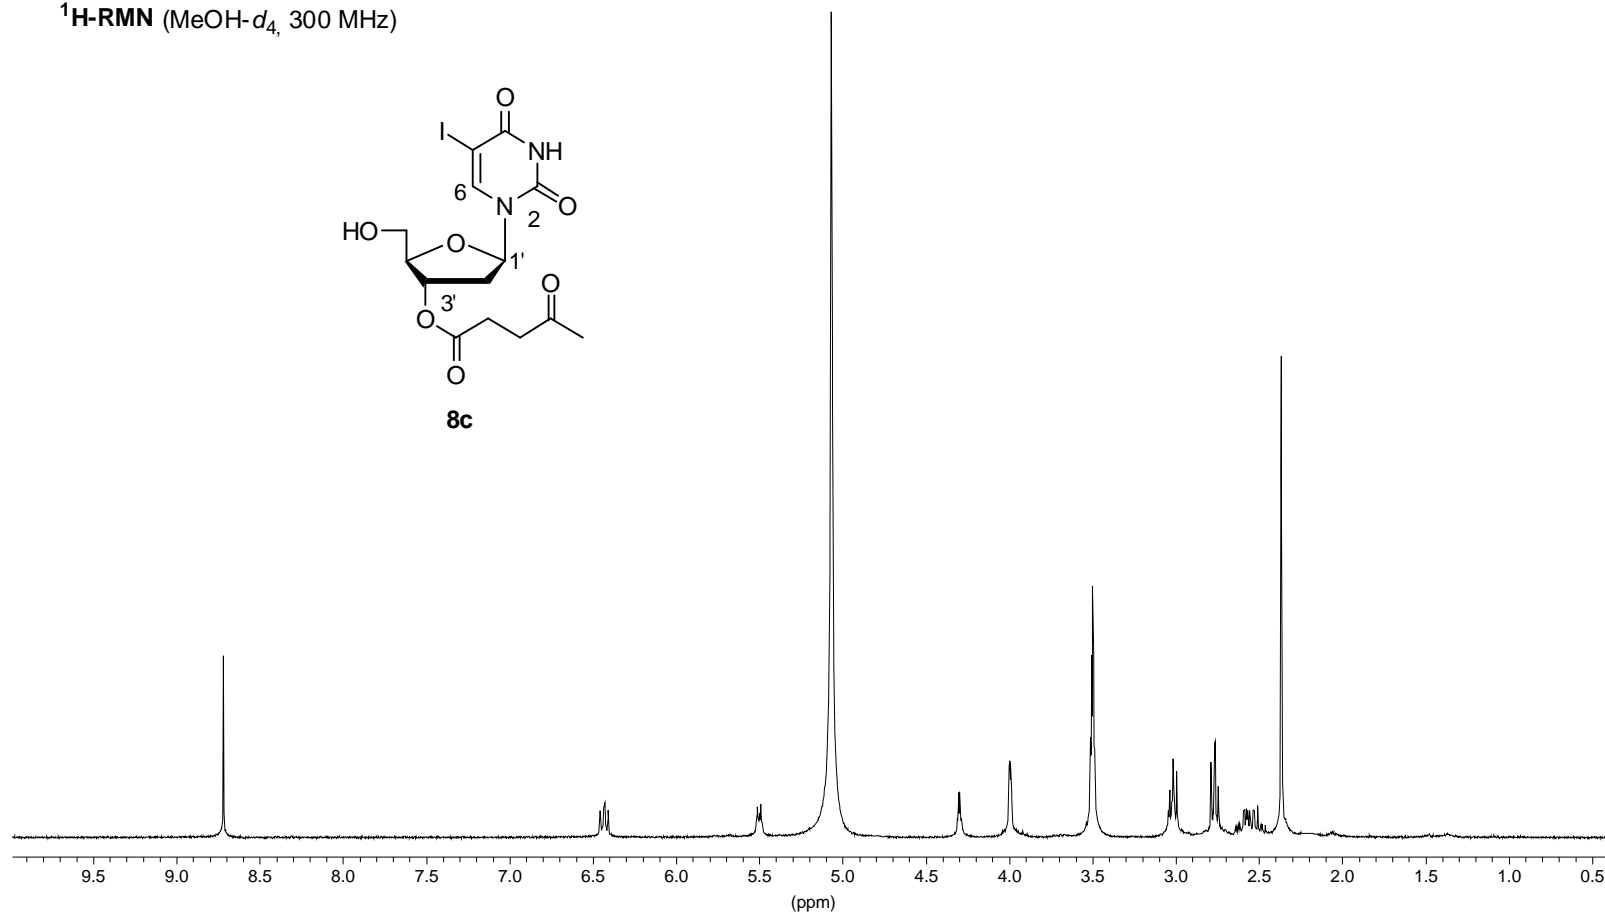

**5-Iodo-3'-O-levulinyl-2'-deoxyuridine (8c)**

<sup>13</sup>C-RMN (MeOH-d<sub>4</sub>, 75.5 MHz)

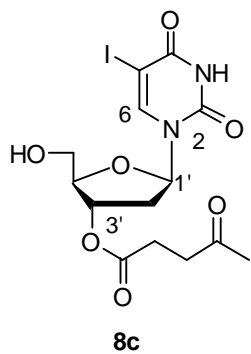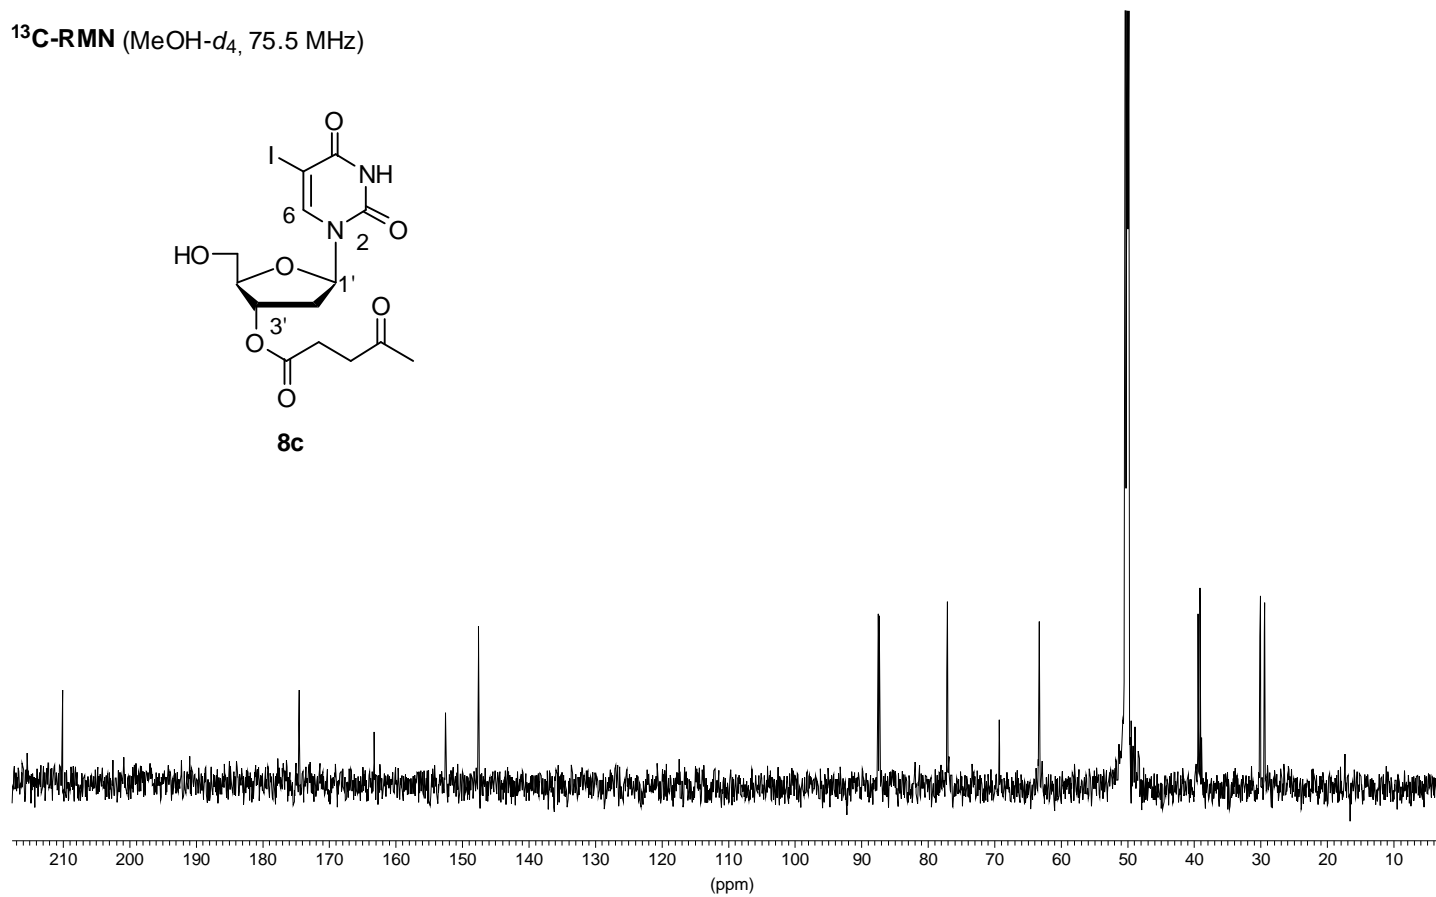

**5-Iodo-3'-*O*-levulinyl-2'-deoxyuridine (8c)**

DEPT (MeOH-*d*<sub>4</sub>, 75.5 MHz)

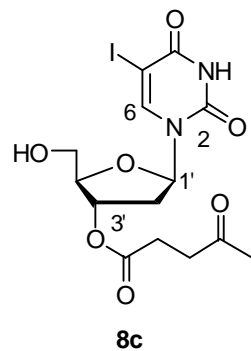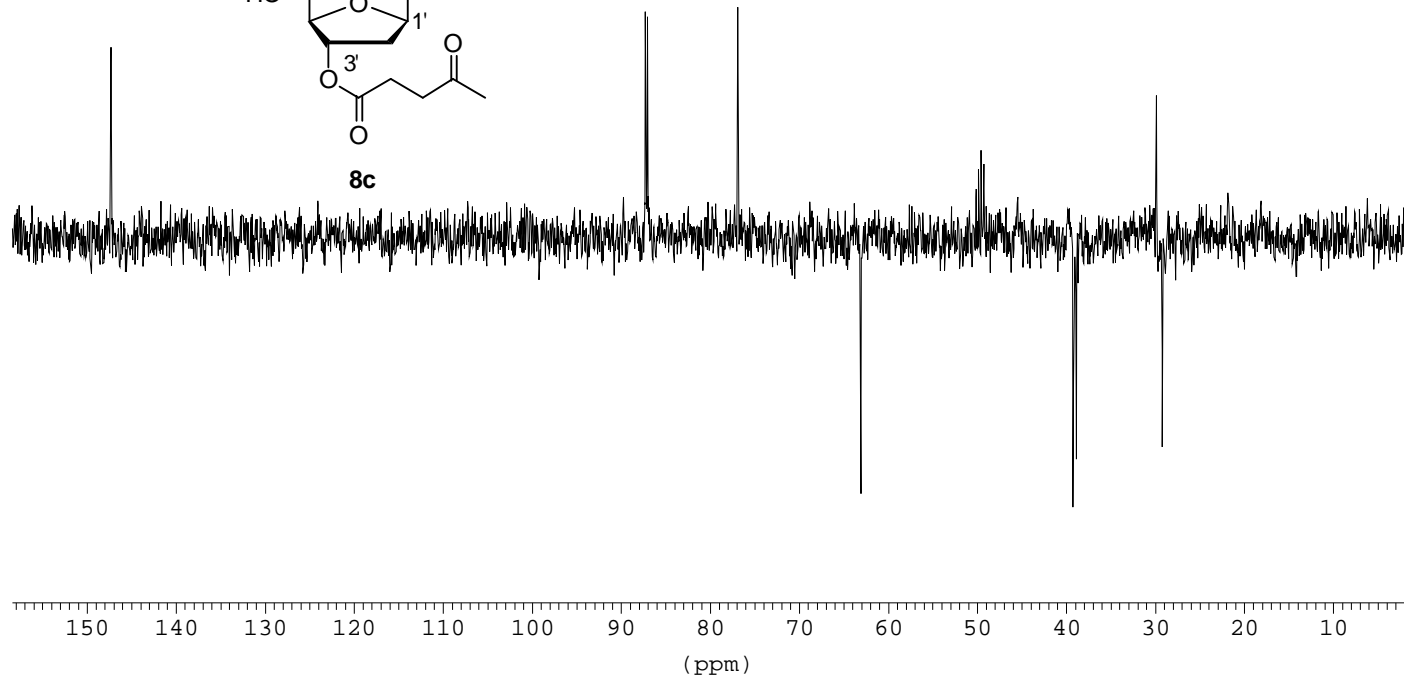

5-Iodo-3'-O-levulinyl-2'-deoxyuridine (8c)

COSY (MeOH- $d_4$ , 300 MHz)

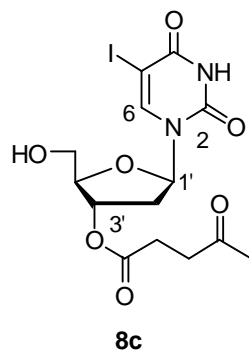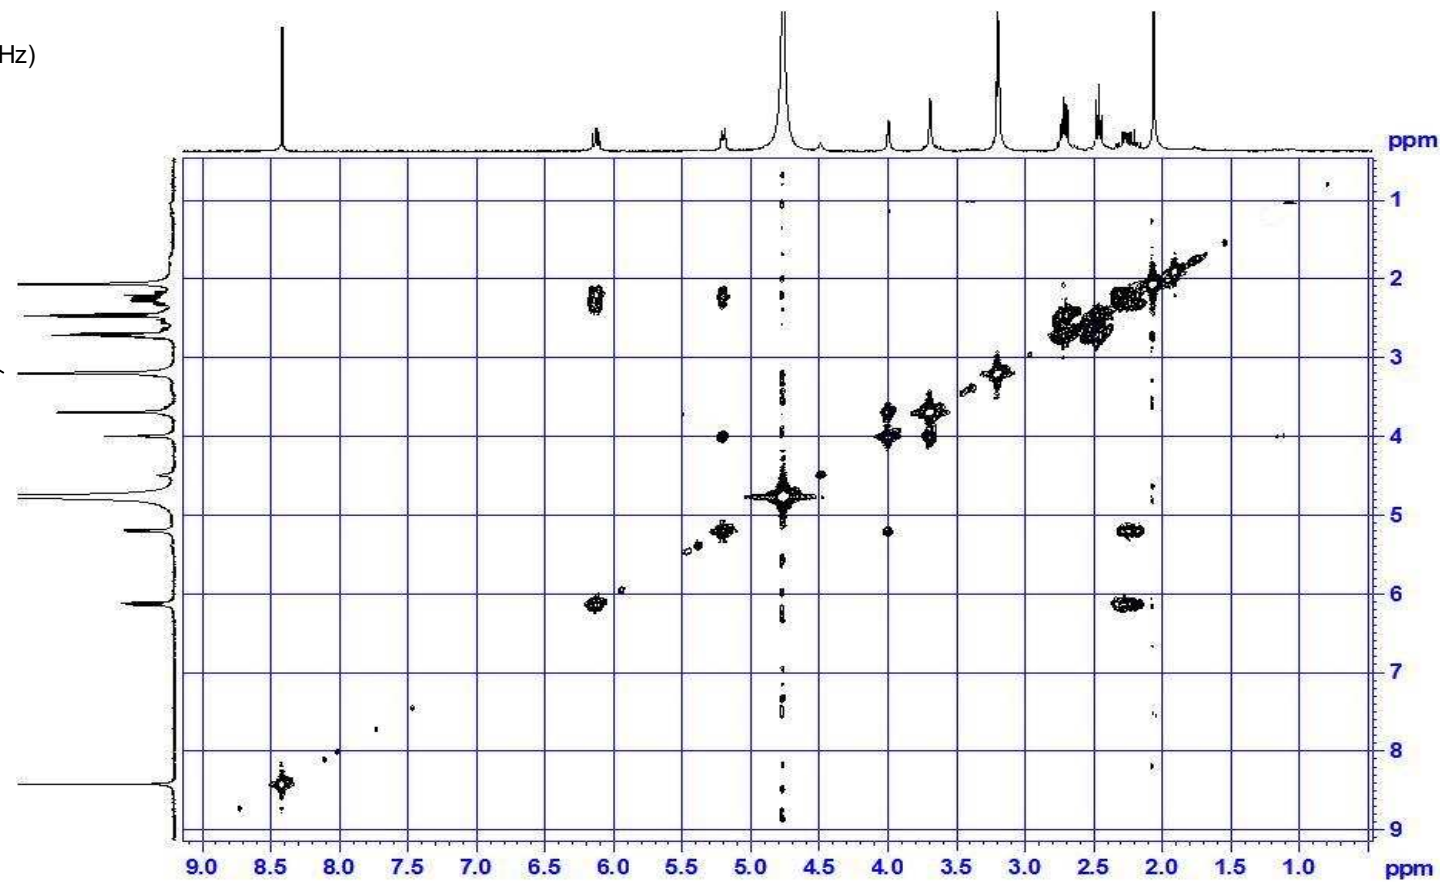

### 5-Iodo-5'-O-levulinyl-2'-deoxyuridine (8d)

<sup>1</sup>H-RMN (MeOH-*d*<sub>4</sub>, 300 MHz)

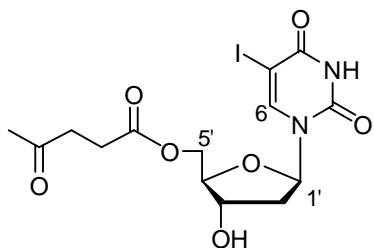

8d

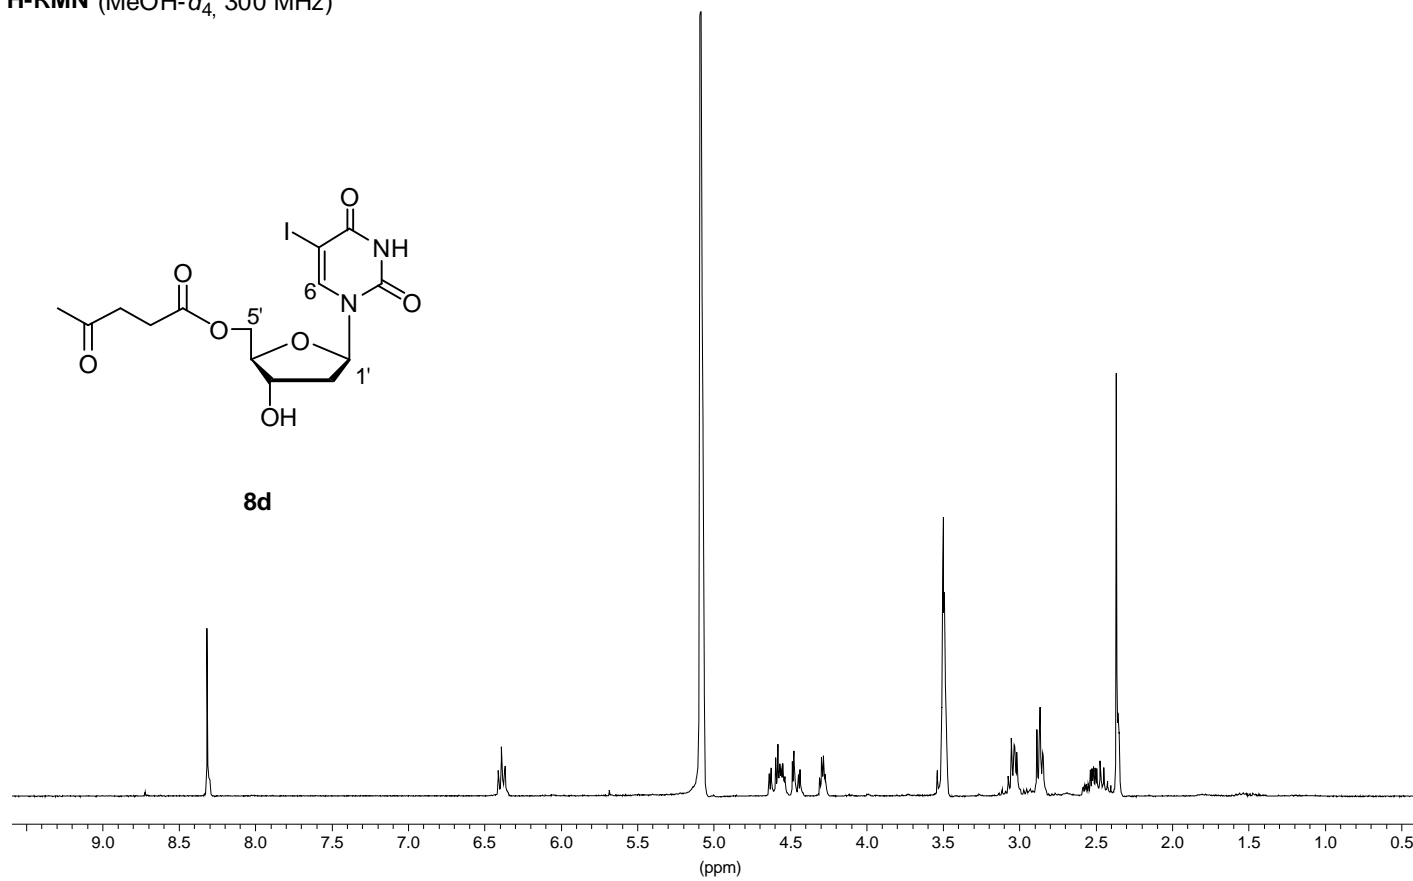



### 5-Iodo-5'-*O*-levulinyl-2'-deoxyuridine (8d)

$^{13}\text{C}$ -RMN (MeOH- $d_4$ , 75.5 MHz)

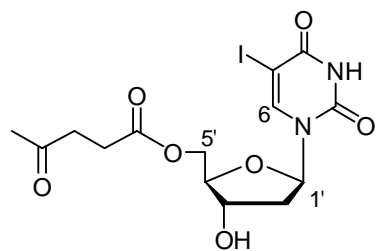

8d

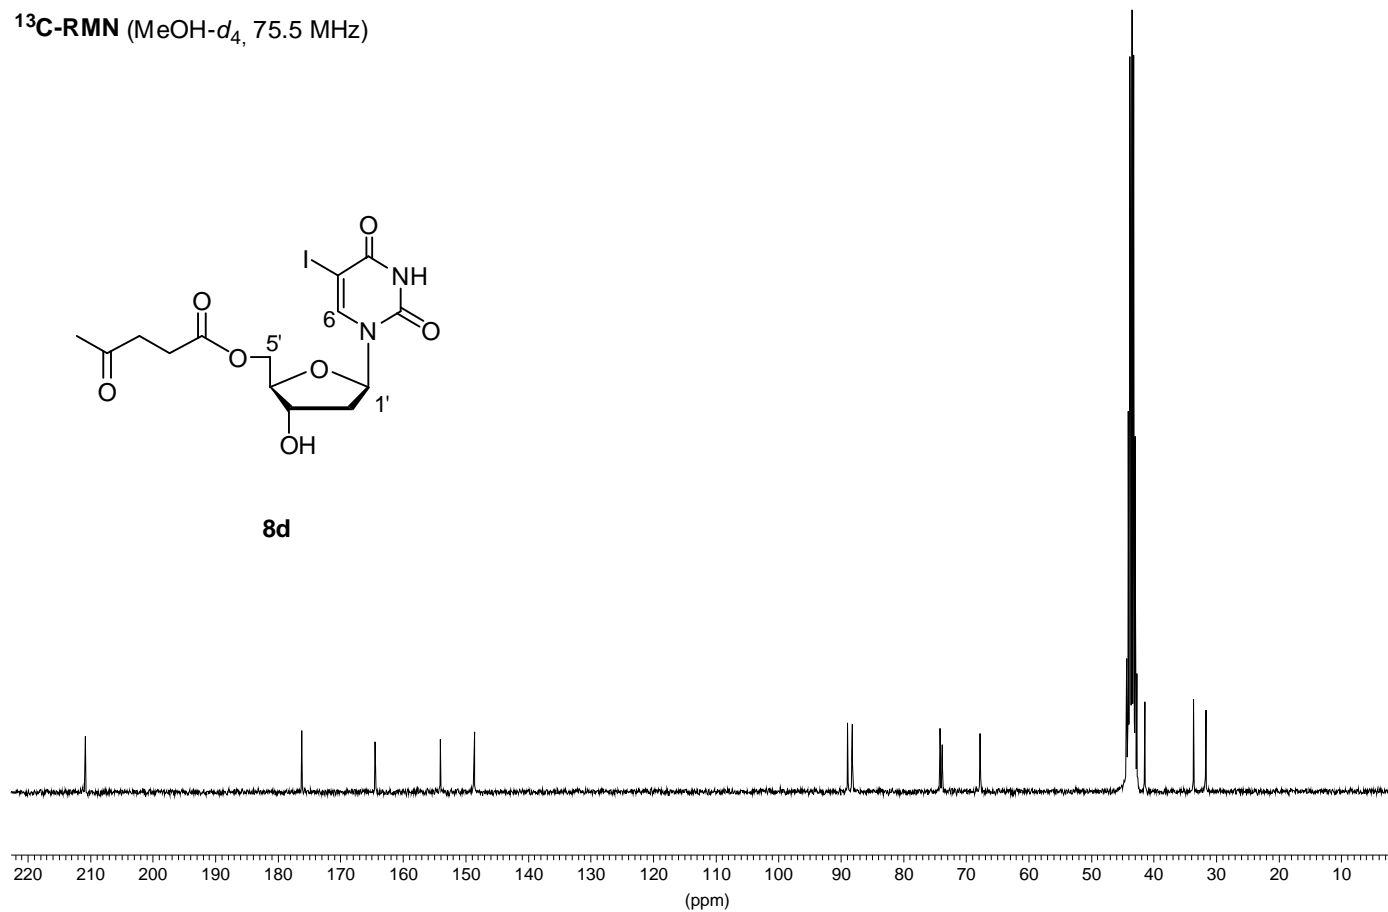

### 5-Iodo-5'-*O*-levulinyl-2'-deoxyuridine (8d)

DEPT (MeOH-*d*<sub>4</sub>, 75.5 MHz)

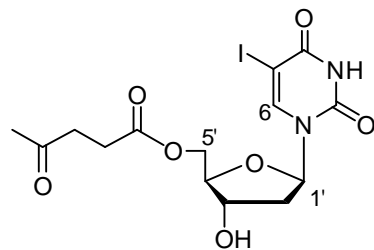

8d

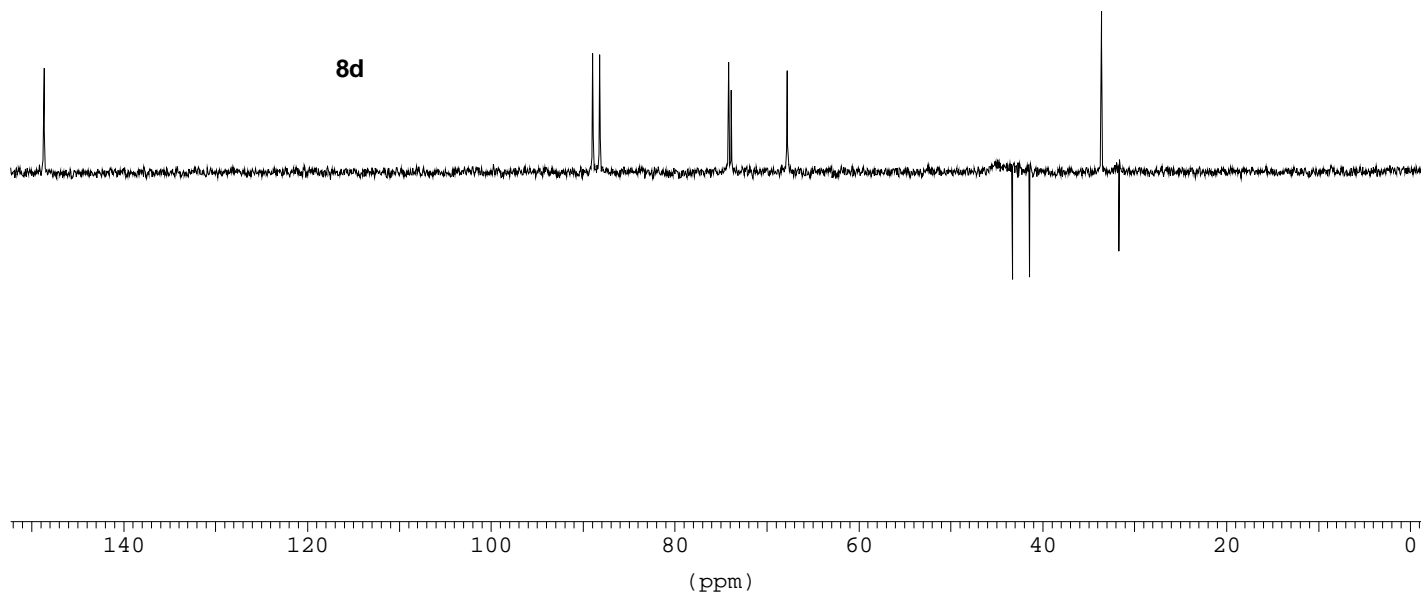

***N*<sup>6</sup>-(Dimethylamino)methylene-2',3'-dideoxyadenosine (8f)**

<sup>1</sup>H-RMN (MeOH-*d*<sub>4</sub>, 300 MHz)

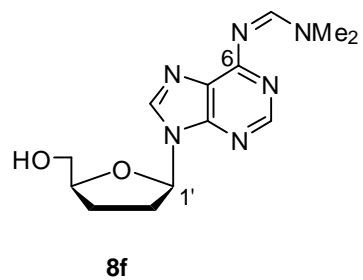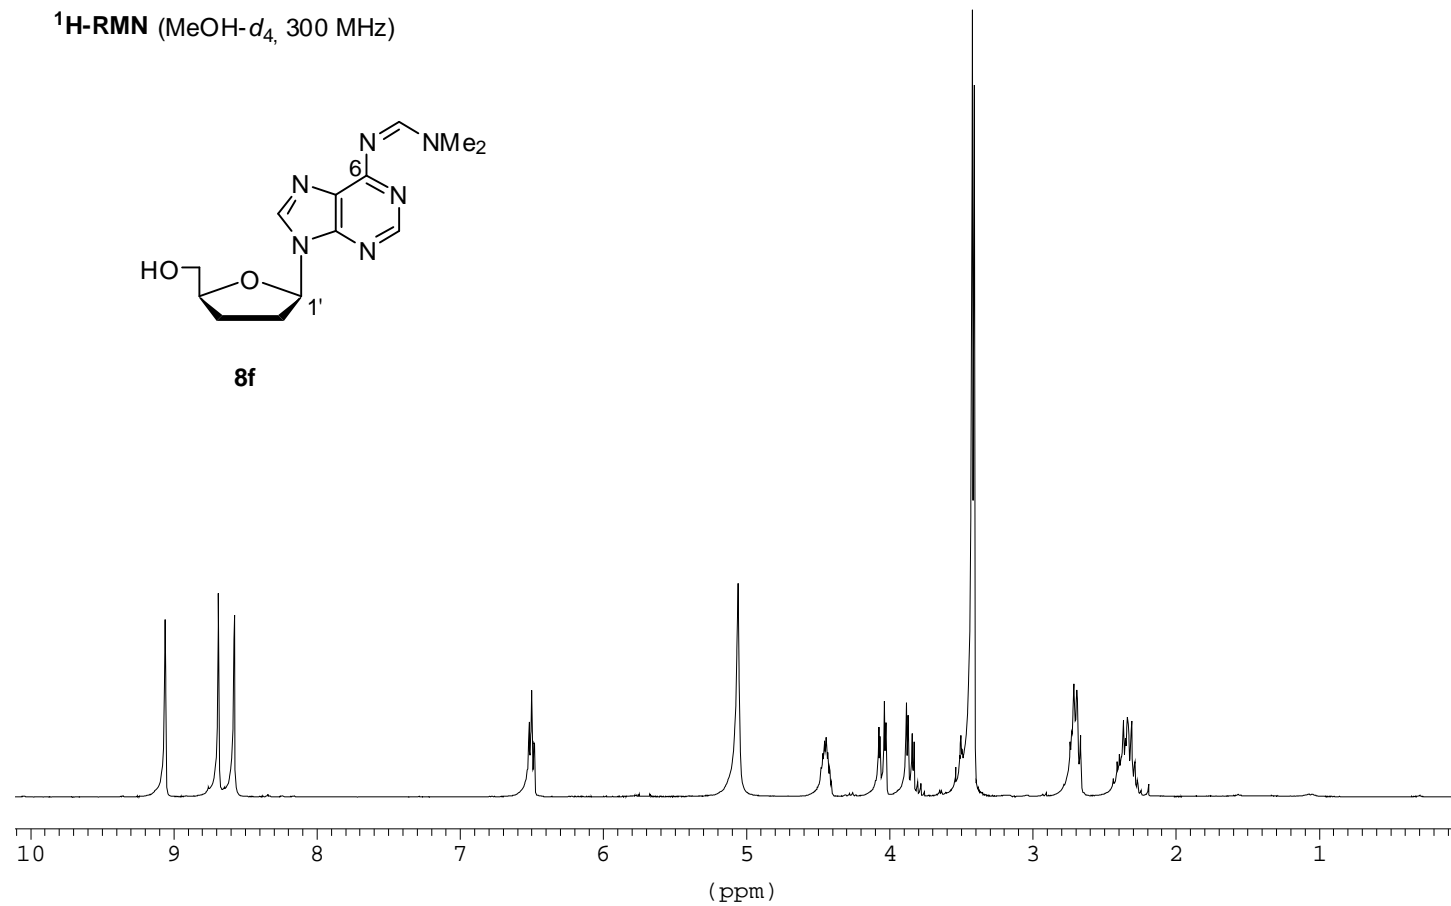

***N*<sup>6</sup>-(Dimethylamino)methylene-2',3'-dideoxyadenosine (8f)**

<sup>13</sup>C-RMN (MeOH-*d*<sub>4</sub>, 75.5 MHz)

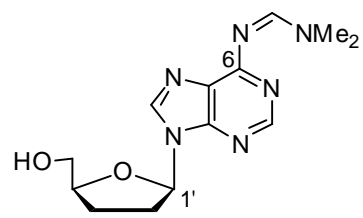

**8f**

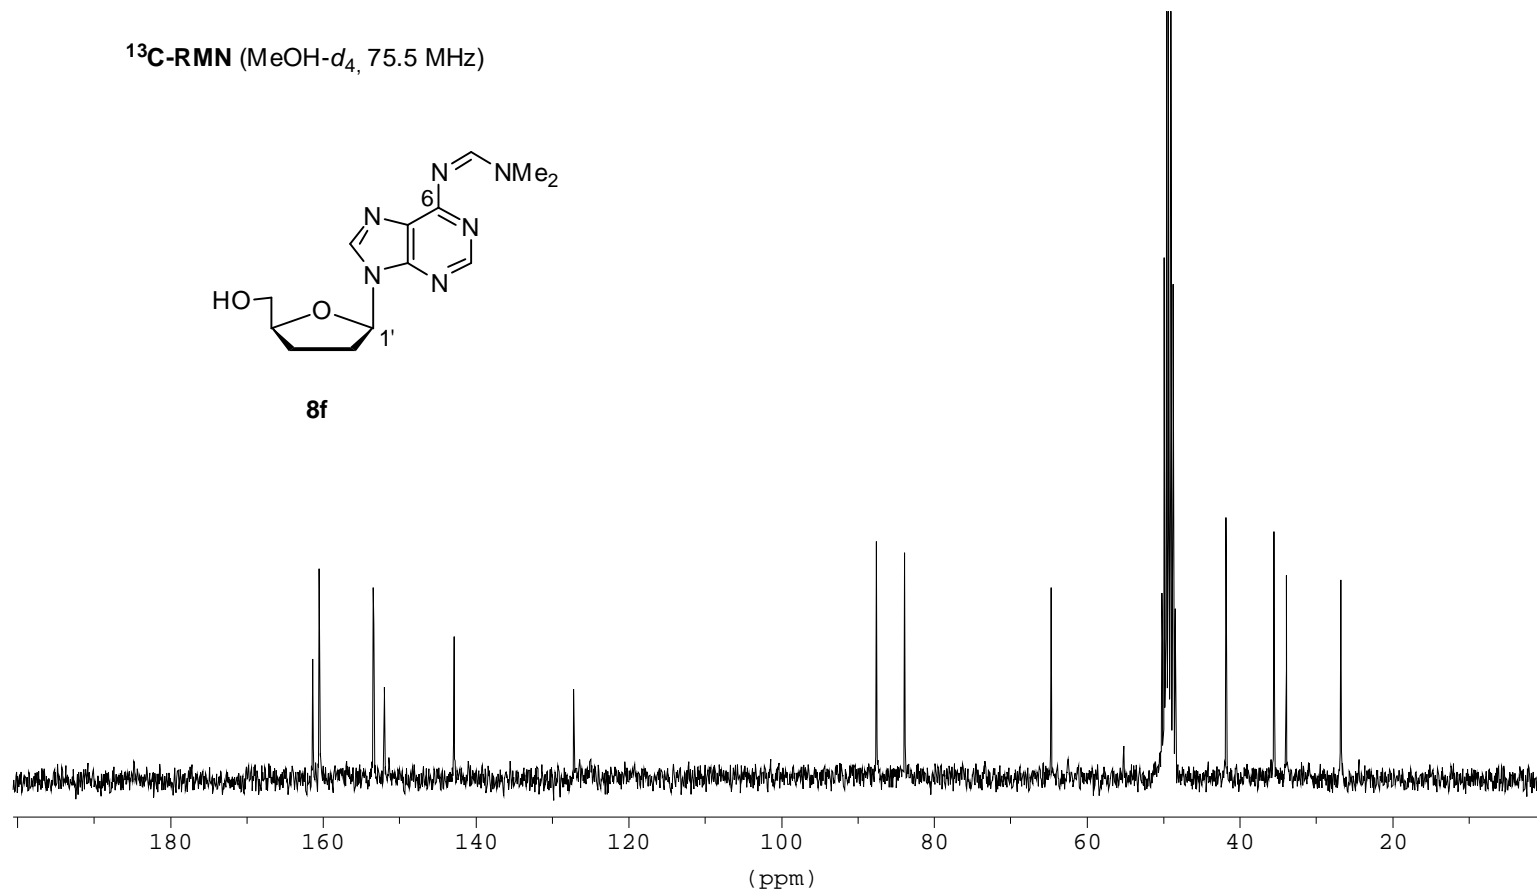

***N*<sup>6</sup>-(Dimethylamino)methylene-2',3'-dideoxyadenosine (8f)**

DEPT (MeOH-*d*<sub>4</sub>, 75.5 MHz)

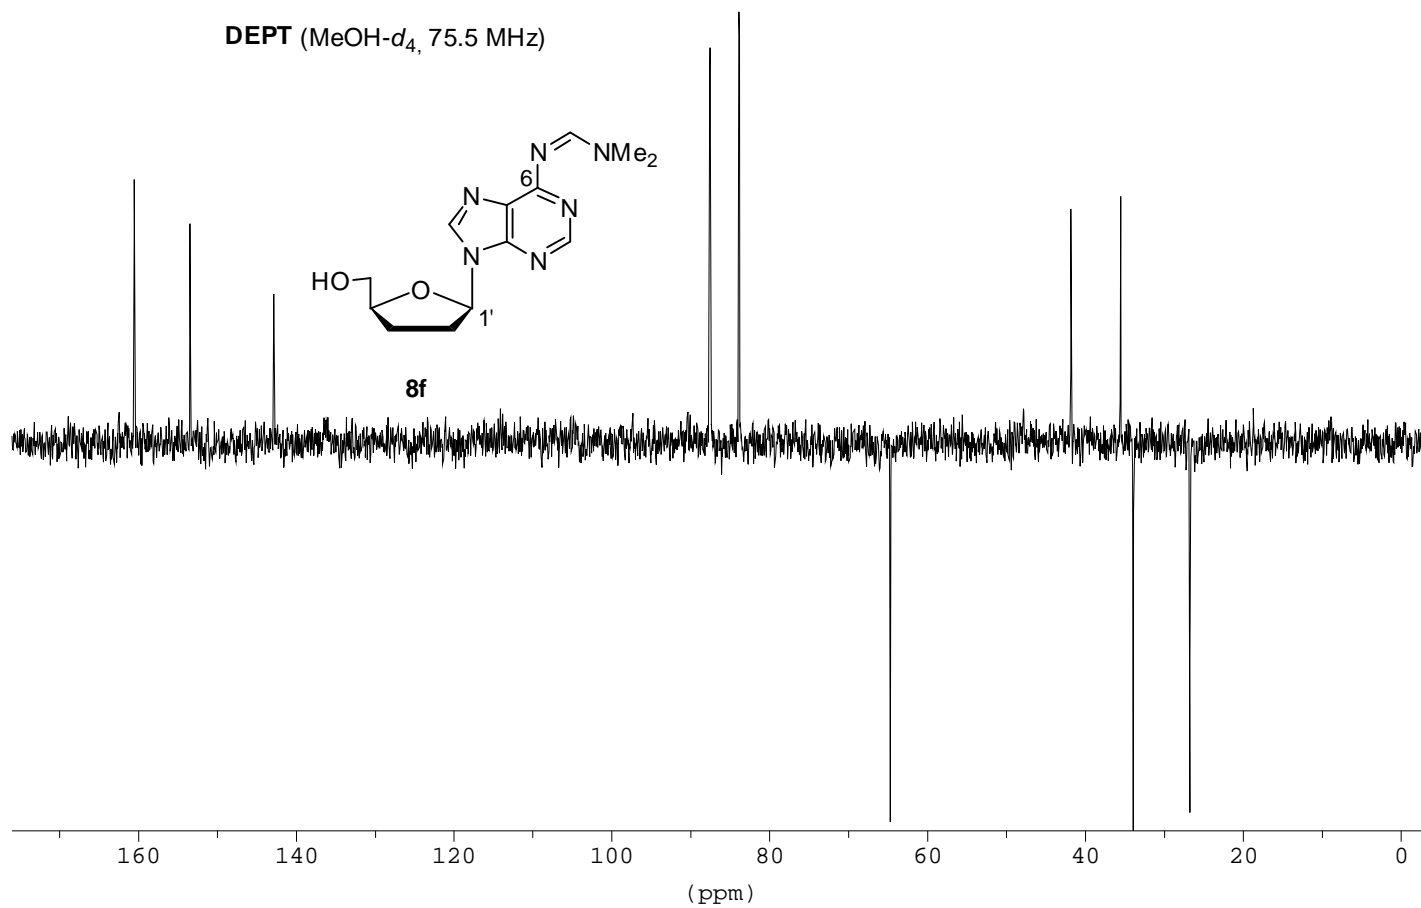

**1-(2',3'-Di-O-acetyl-β-D-ribofuranosyl)-1H-1,2,4-triazole-3-carboxamide (8g)**

<sup>1</sup>H-RMN (MeOH-d<sub>4</sub>, 300 MHz)

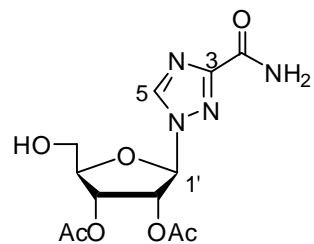

**8g**

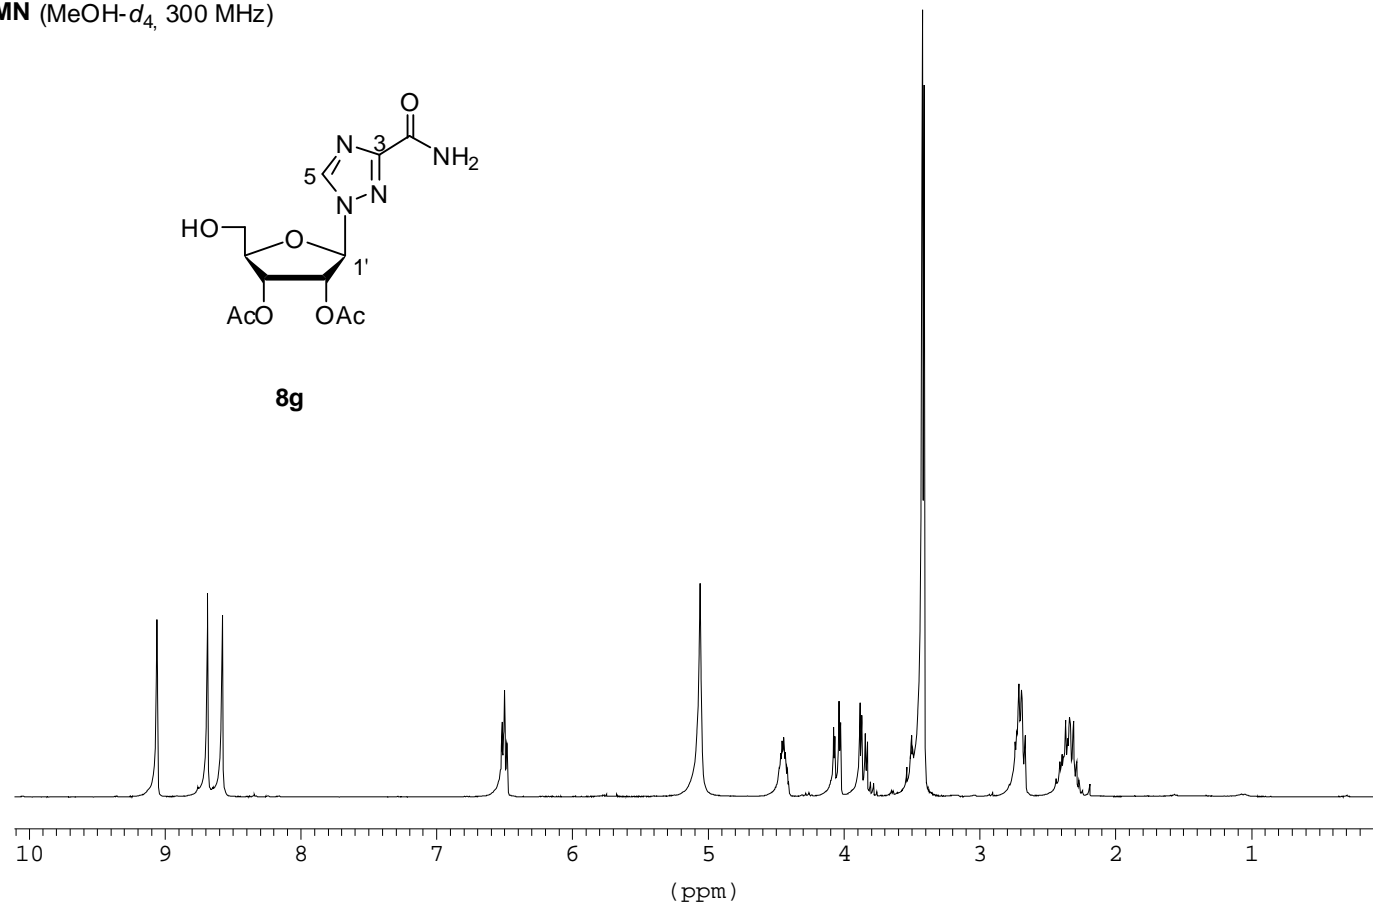

**1-(2',3'-Di-O-acetyl-β-D-ribofuranosyl)-1H-1,2,4-triazole-3-carboxamide (8g)**

<sup>13</sup>C-RMN (MeOH-d<sub>4</sub>, 75.5 MHz)

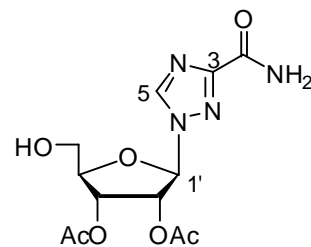

**8g**

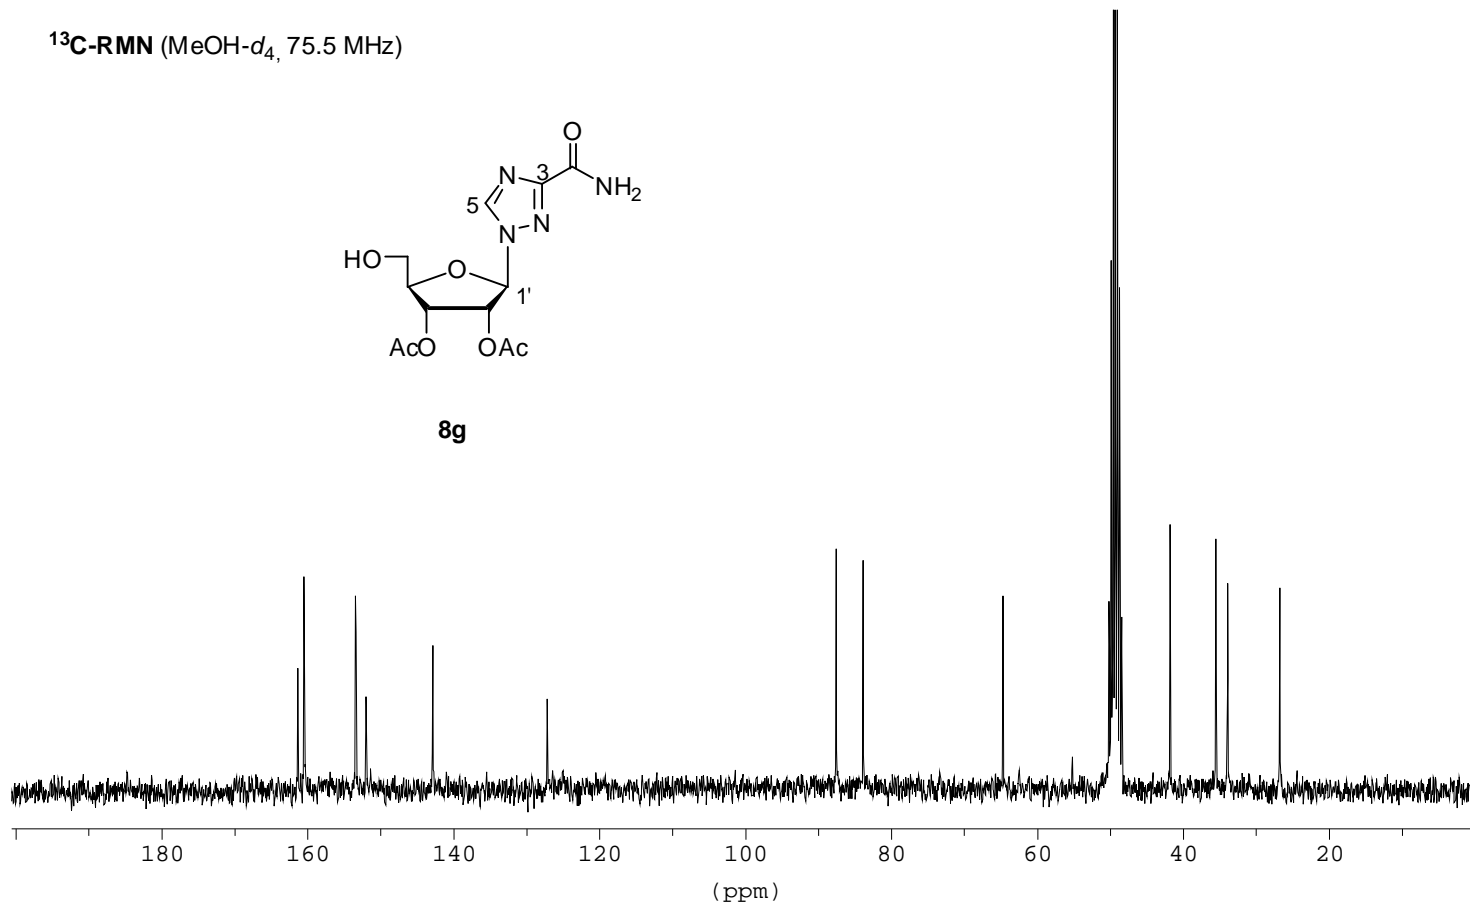

**1-(2',3'-Di-O-acetyl-β-D-ribofuranosyl)-1H-1,2,4-triazole-3-carboxamide (8g)**

DEPT (MeOH-*d*<sub>4</sub>, 75.5 MHz)

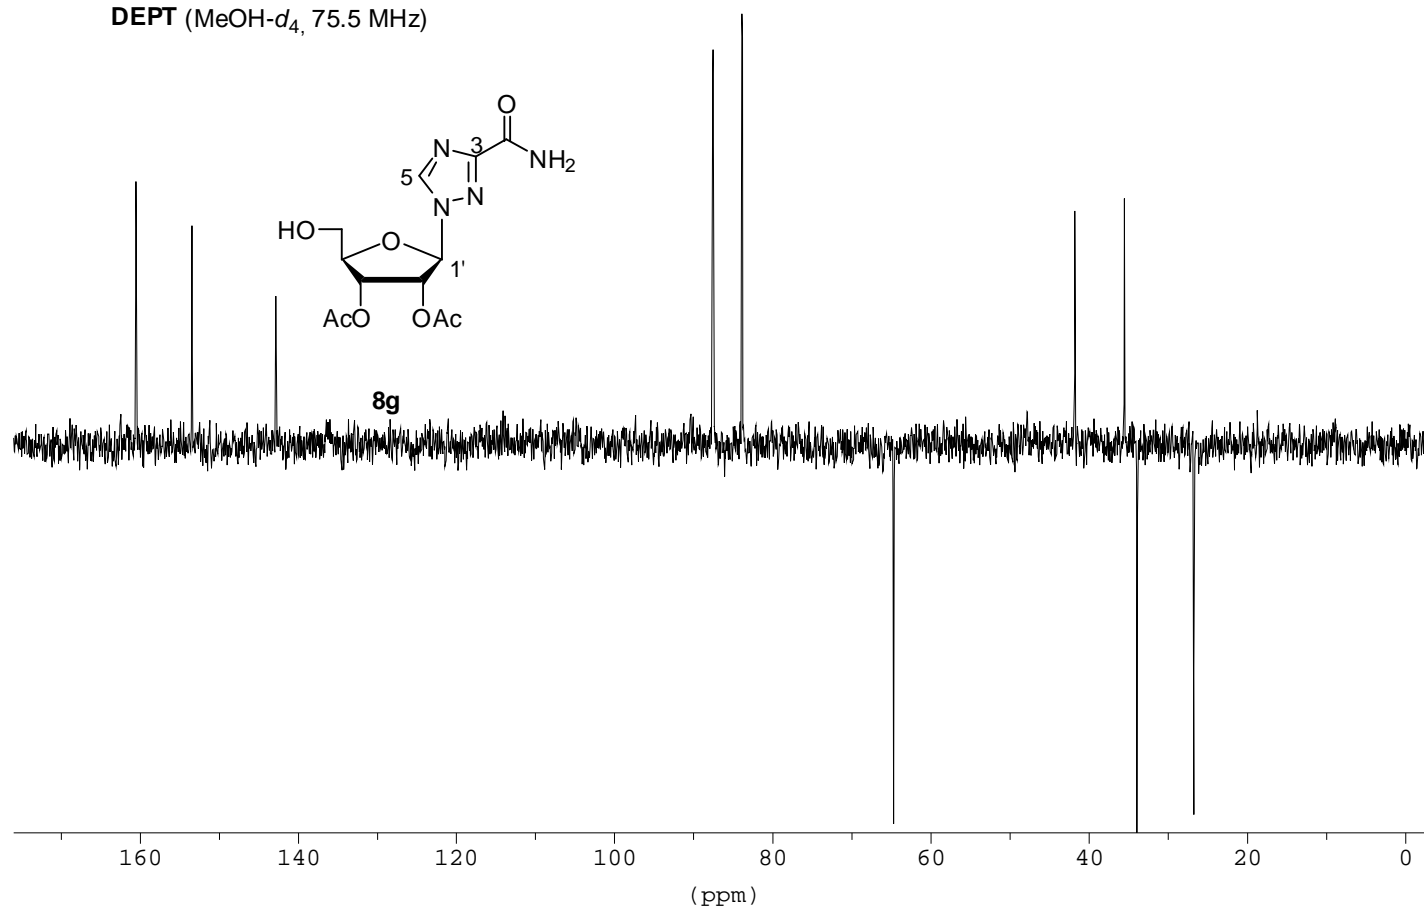



***N*<sup>6</sup>-Benzoyl-9-(2',3'-di-*O*-acetyl-β-*D*-arabinofuranosyl)adenine (8h)**

<sup>1</sup>H-RMN (MeOH-*d*<sub>4</sub>, 300 MHz)

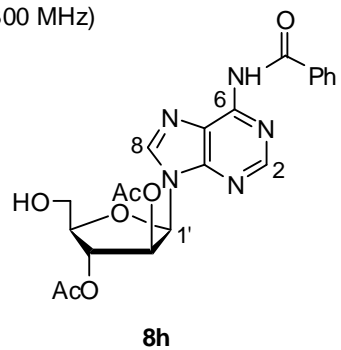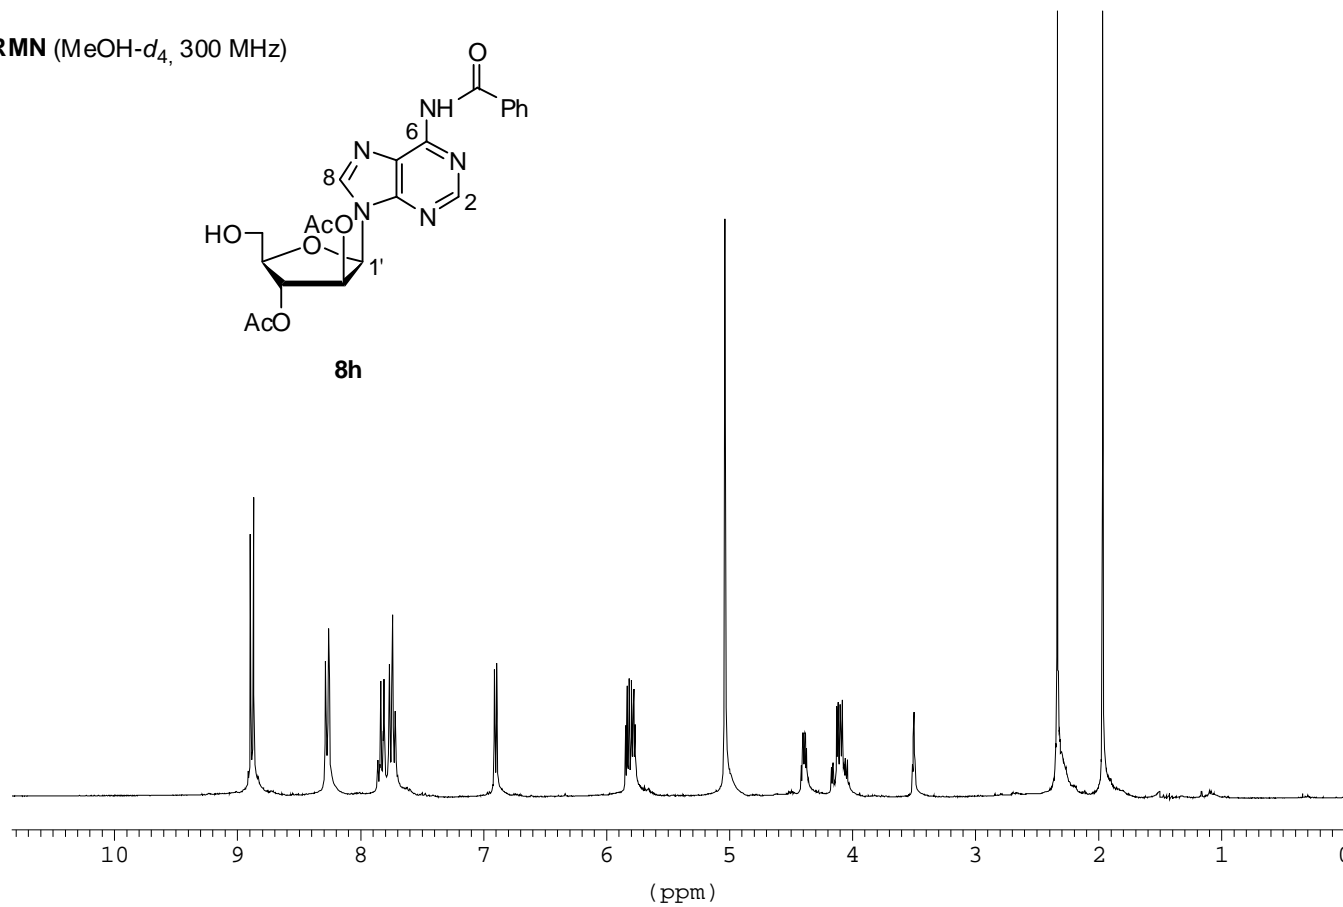

***N*<sup>6</sup>-Benzoyl-9-(2',3'-di-*O*-acetyl-β-*D*-arabinofuranosyl)adenine (8h)**

<sup>13</sup>C-RMN (MeOH-*d*<sub>4</sub>, 75.5 MHz)

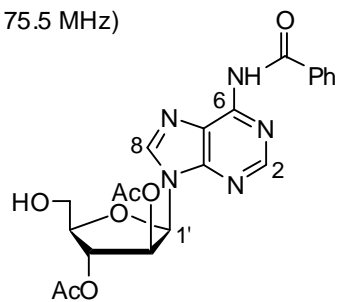

**8h**

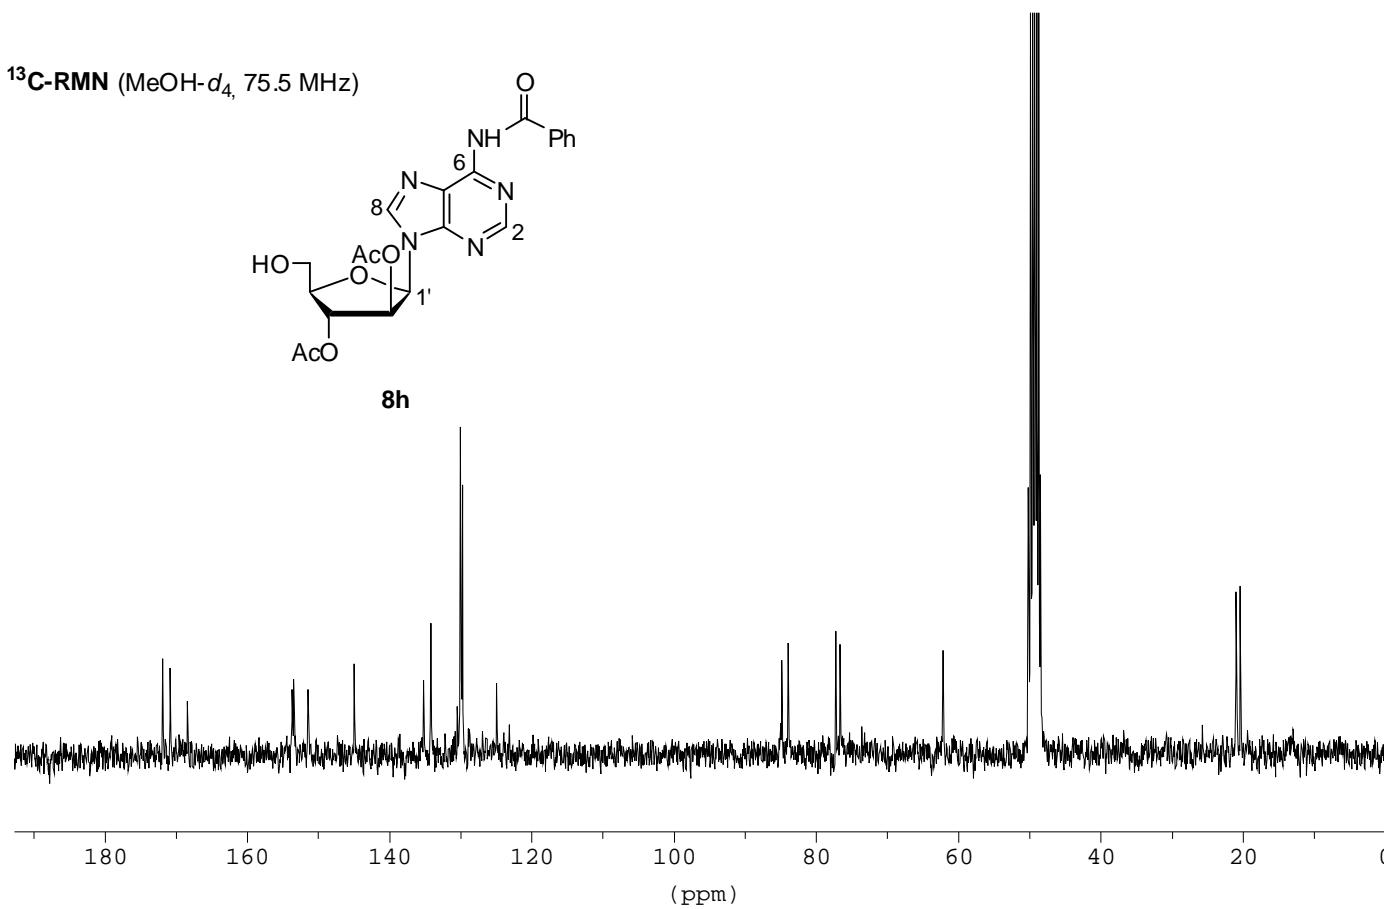

***N*<sup>6</sup>-Benzoyl-9-(2',3'-di-*O*-acetyl-β-*D*-arabinofuranosyl)adenine (**8h**)**

DEPT (MeOH-*d*<sub>4</sub>, 75.5 MHz)

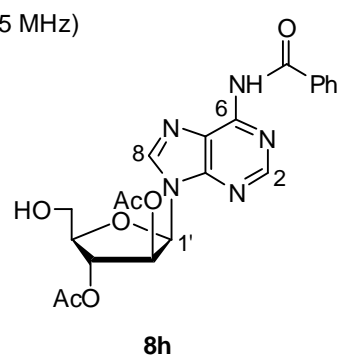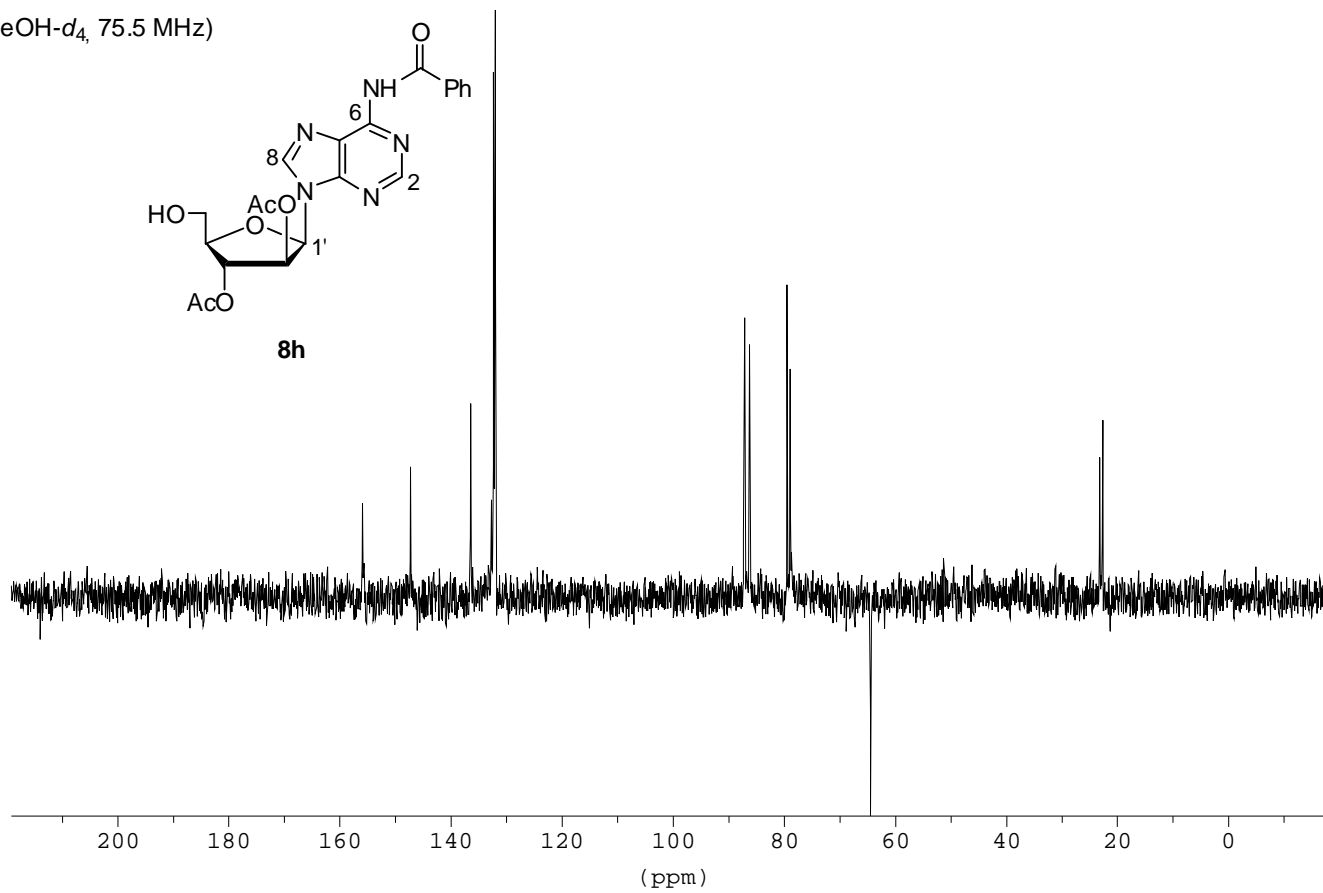

***N*<sup>4</sup>-Acetyl-1-(2',3'-di-*O*-acetyl-β-D-arabinofuranosyl)cytosine (8i)**

<sup>1</sup>H-RMN (CDCl<sub>3</sub>, 300 MHz)

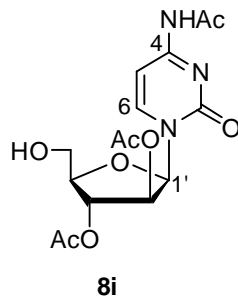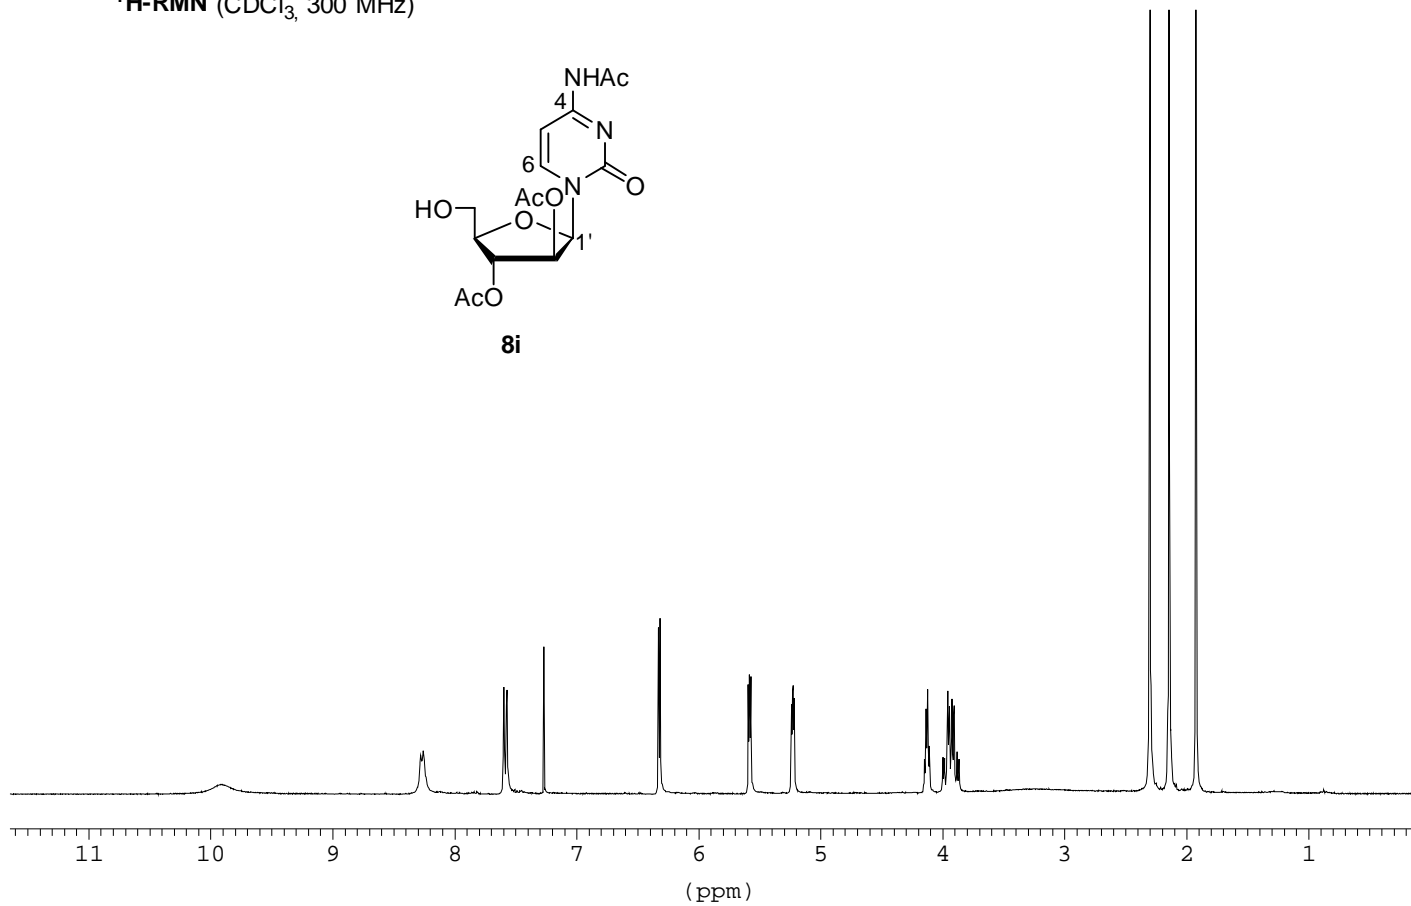

*N*<sup>4</sup>-Acetyl-1-(2',3'-di-*O*-acetyl-β-*D*-arabinofuranosyl)cytosine (**8i**)

<sup>13</sup>C-RMN (CDCl<sub>3</sub>, 75.5 MHz)

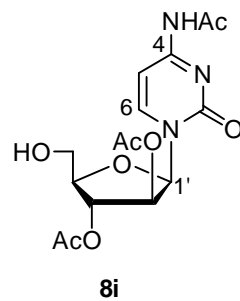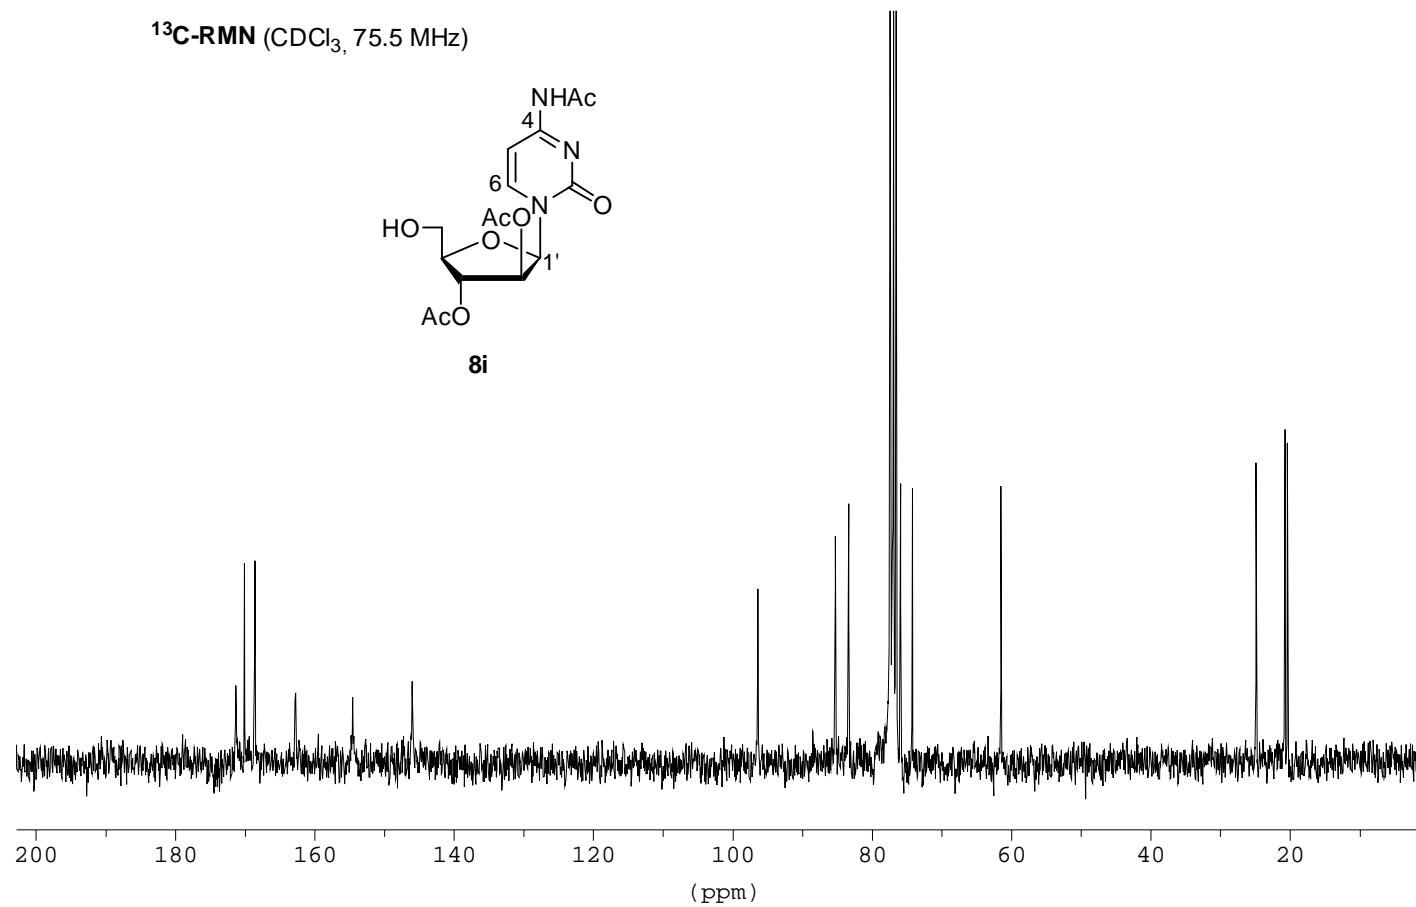

***N*<sup>4</sup>-Acetyl-1-(2',3'-di-*O*-acetyl-β-D-arabinofuranosyl)cytosine (8i)**

DEPT (CDCl<sub>3</sub>, 75.5 MHz)

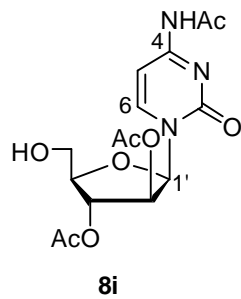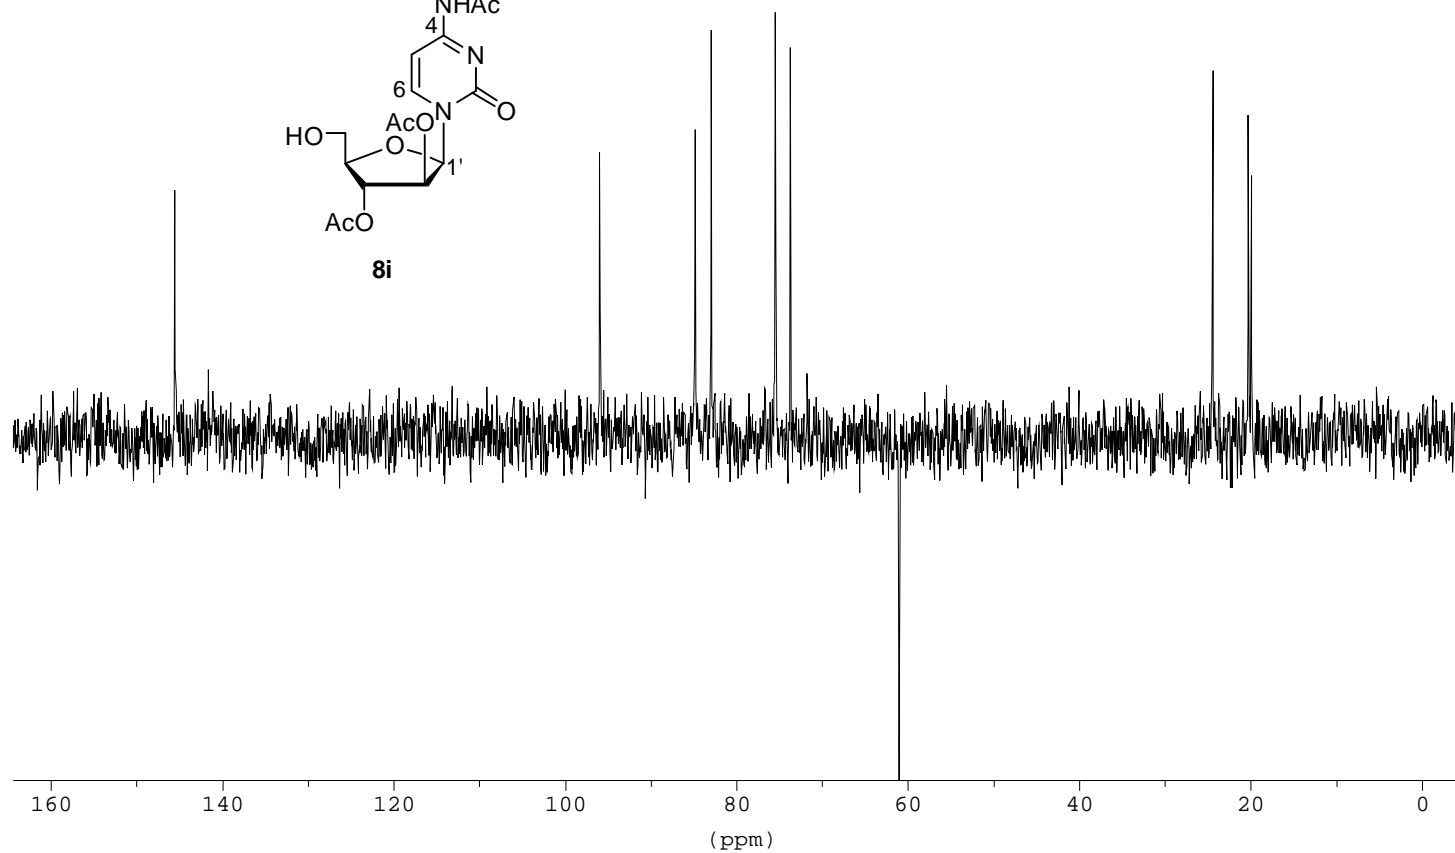

**2-Cyanoethyl-(2',3'-dideoxy-2',3'-dideoxyuridin-5'-yl)-1,2,3,4-tetra-*O*-acetyl- $\alpha$ -D-glucopyranos-6-yl phosphate (9a)**

**$^1\text{H-RMN}$**  (MeOH- $d_4$ , 600 MHz)

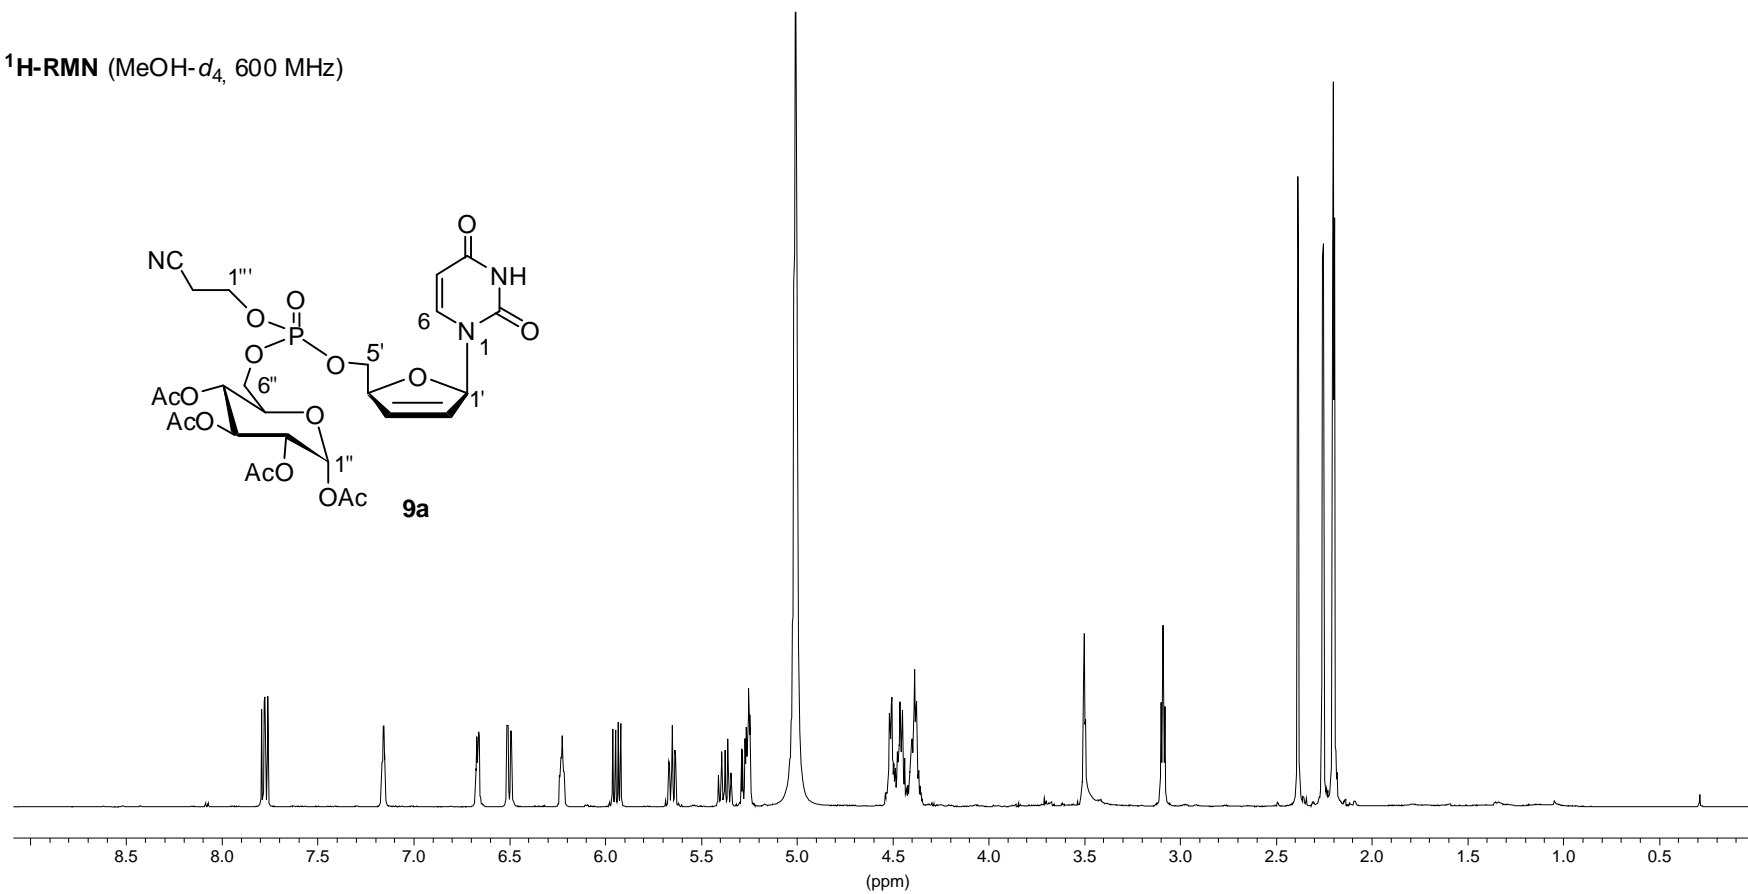

**2-Cyanoethyl-(2',3'-didehydro-2',3'-dideoxyuridin-5'-yl)-1,2,3,4-tetra-*O*-acetyl- $\alpha$ -D-glucopyranos-6-yl phosphate (9a)**

$^{13}\text{C}$ -RMN (MeOH- $d_4$ , 150.5 MHz)

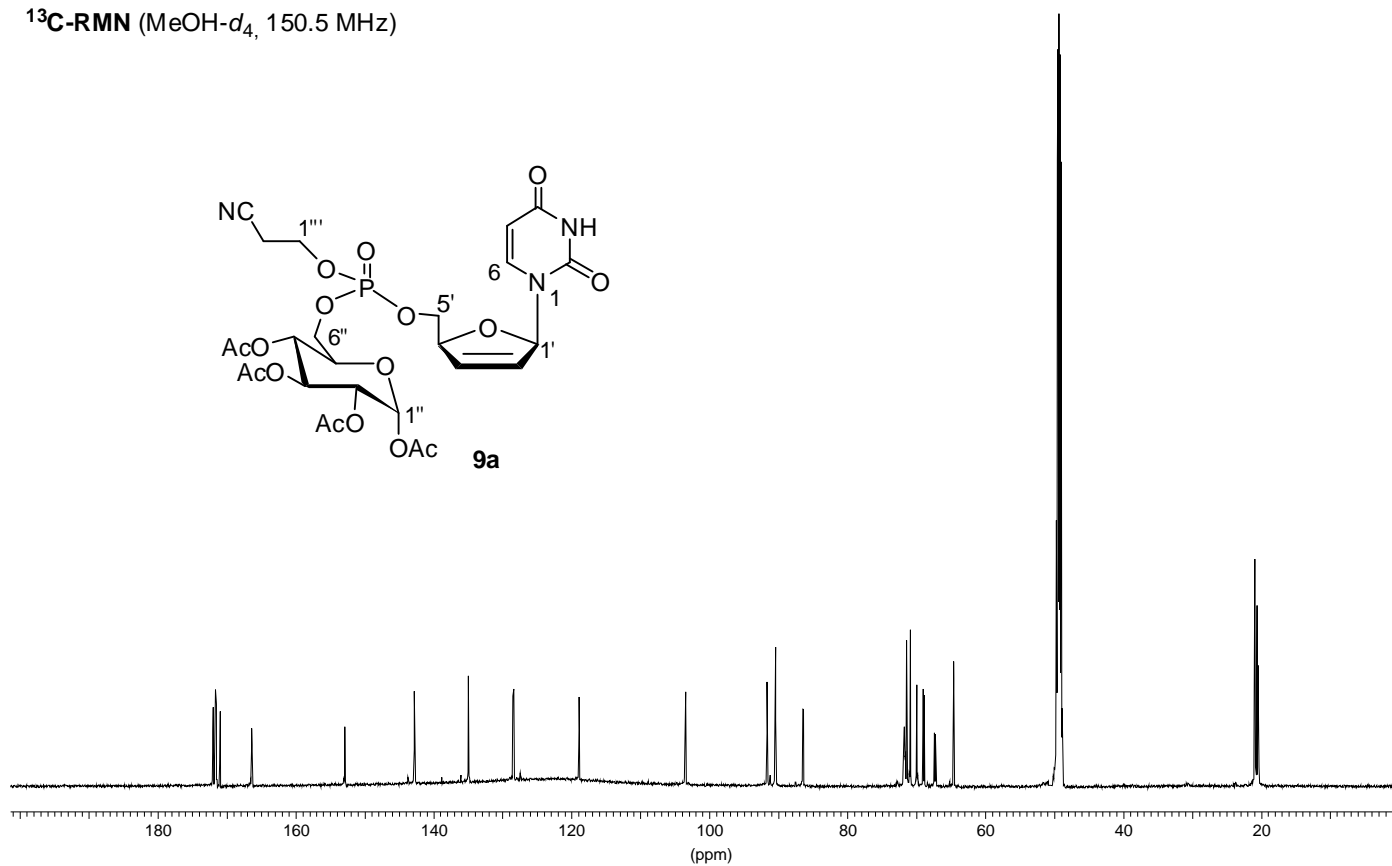



**2-Cyanoethyl-(2',3'-didehydro-2',3'-dideoxyuridin-5'-yl)-1,2,3,4-tetra-*O*-acetyl- $\alpha$ -D-glucopyranos-6-yl phosphate (9a)**

DEPT (MeOH- $d_4$ , 150.5 MHz)

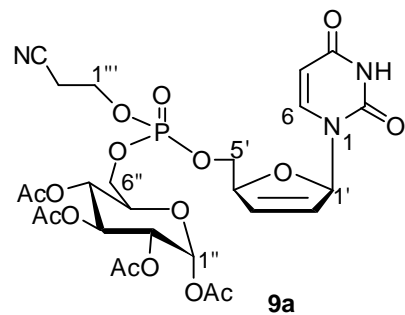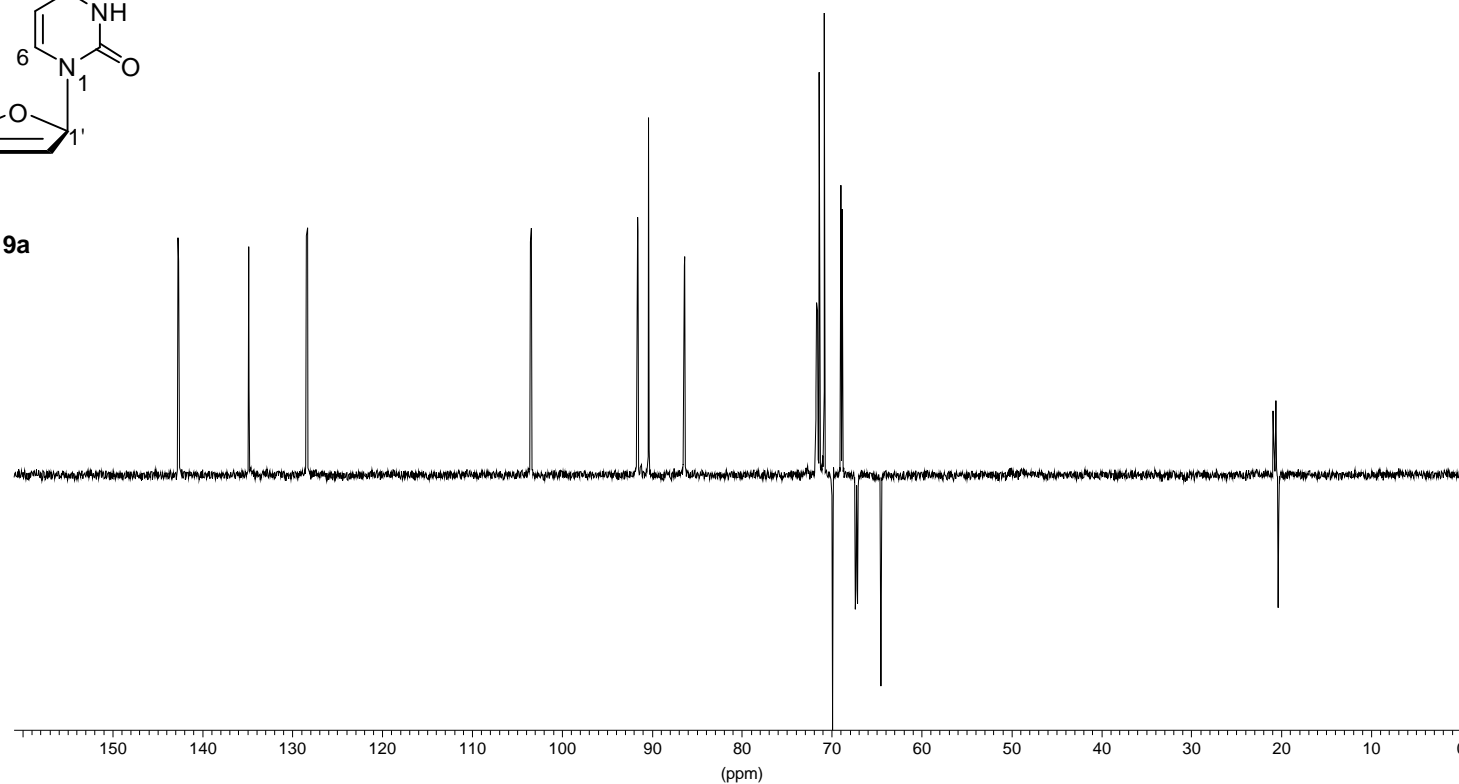

**2-Cyanoethyl-(2',3'-dideoxy-2',3'-dideoxyuridin-5'-yl)-1,2,3,4-tetra-*O*-acetyl- $\alpha$ -D-glucopyranos-6-yl phosphate (9a)**

$^{31}\text{P}$ -RMN (MeOH- $d_4$ , 242.9 MHz)

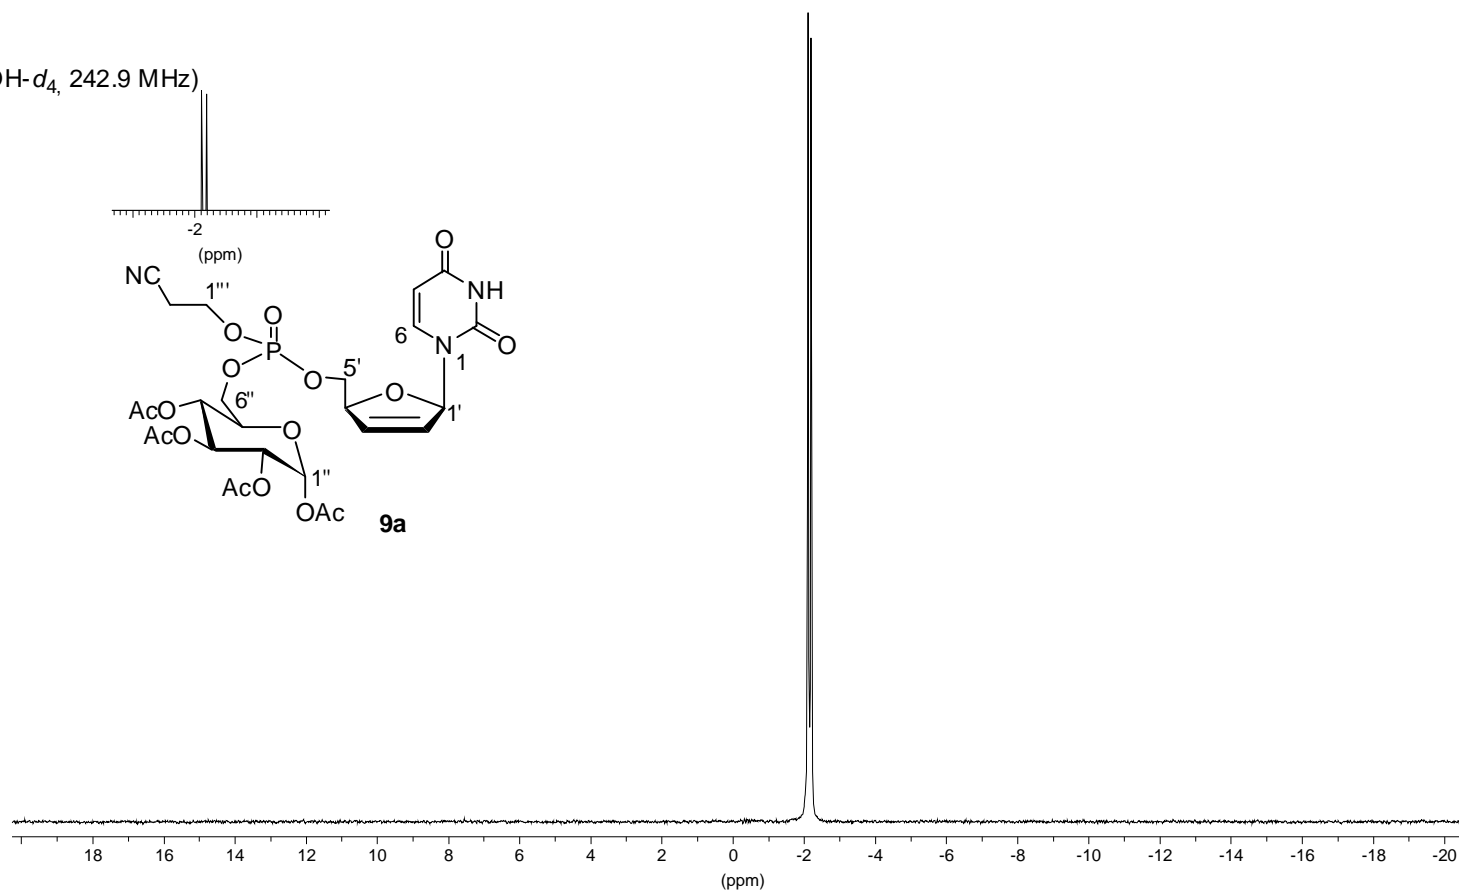

**2-Cyanoethyl-(2',3'-didehydro-2',3'-dideoxythymidin-5'-yl)-1,2,3,4-tetra-*O*-acetyl- $\alpha$ -D-glucopyranos-6-yl phosphate (9b)**

<sup>1</sup>H-RMN (MeOH-*d*<sub>4</sub>, 600 MHz)

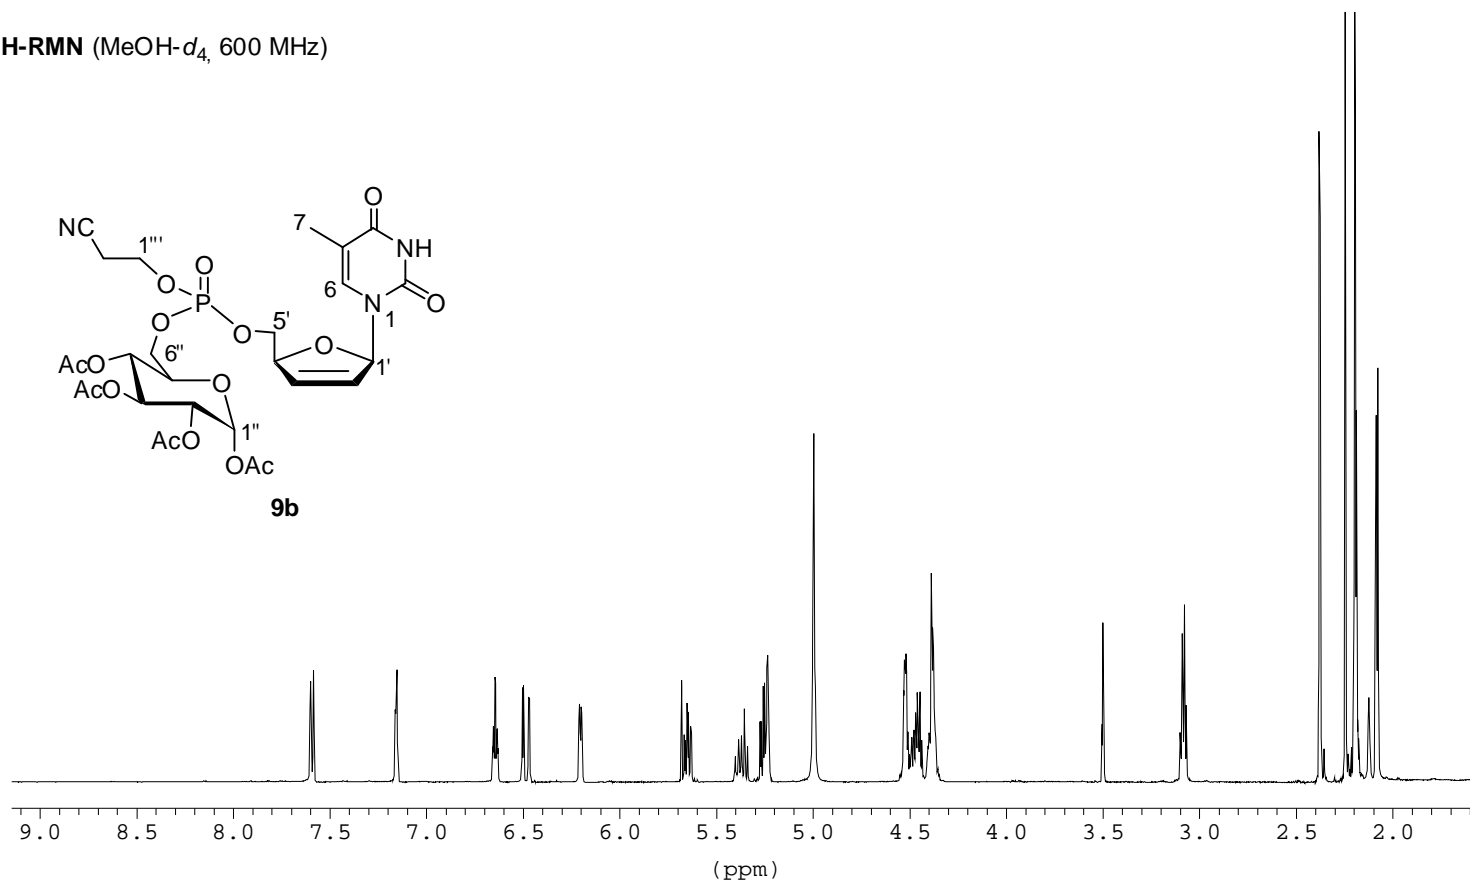

**2-Cyanoethyl-(2',3'-dideoxythymidin-5'-yl)-1,2,3,4-tetra-*O*-acetyl- $\alpha$ -D-glucopyranos-6-yl phosphate (9b)**

$^{13}\text{C}$ -RMN (MeOH- $d_4$ , 150.5 MHz)

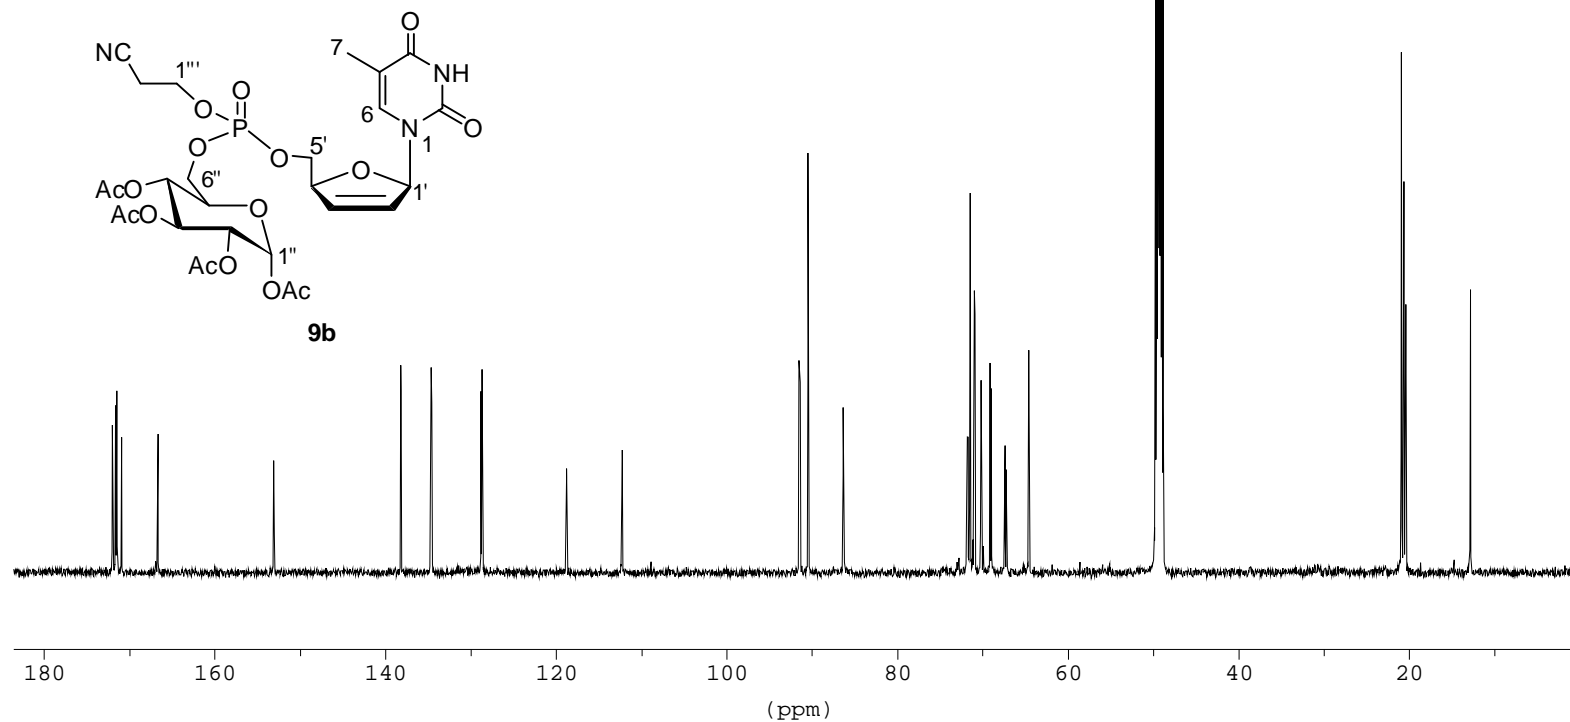

**2-Cyanoethyl-(2',3'-didehydro-2',3'-dideoxythymidin-5'-yl)-1,2,3,4-tetra-*O*-acetyl- $\alpha$ -D-glucopyranos-6-yl phosphate (9b)**

DEPT (MeOH- $d_4$ , 150.5 MHz)

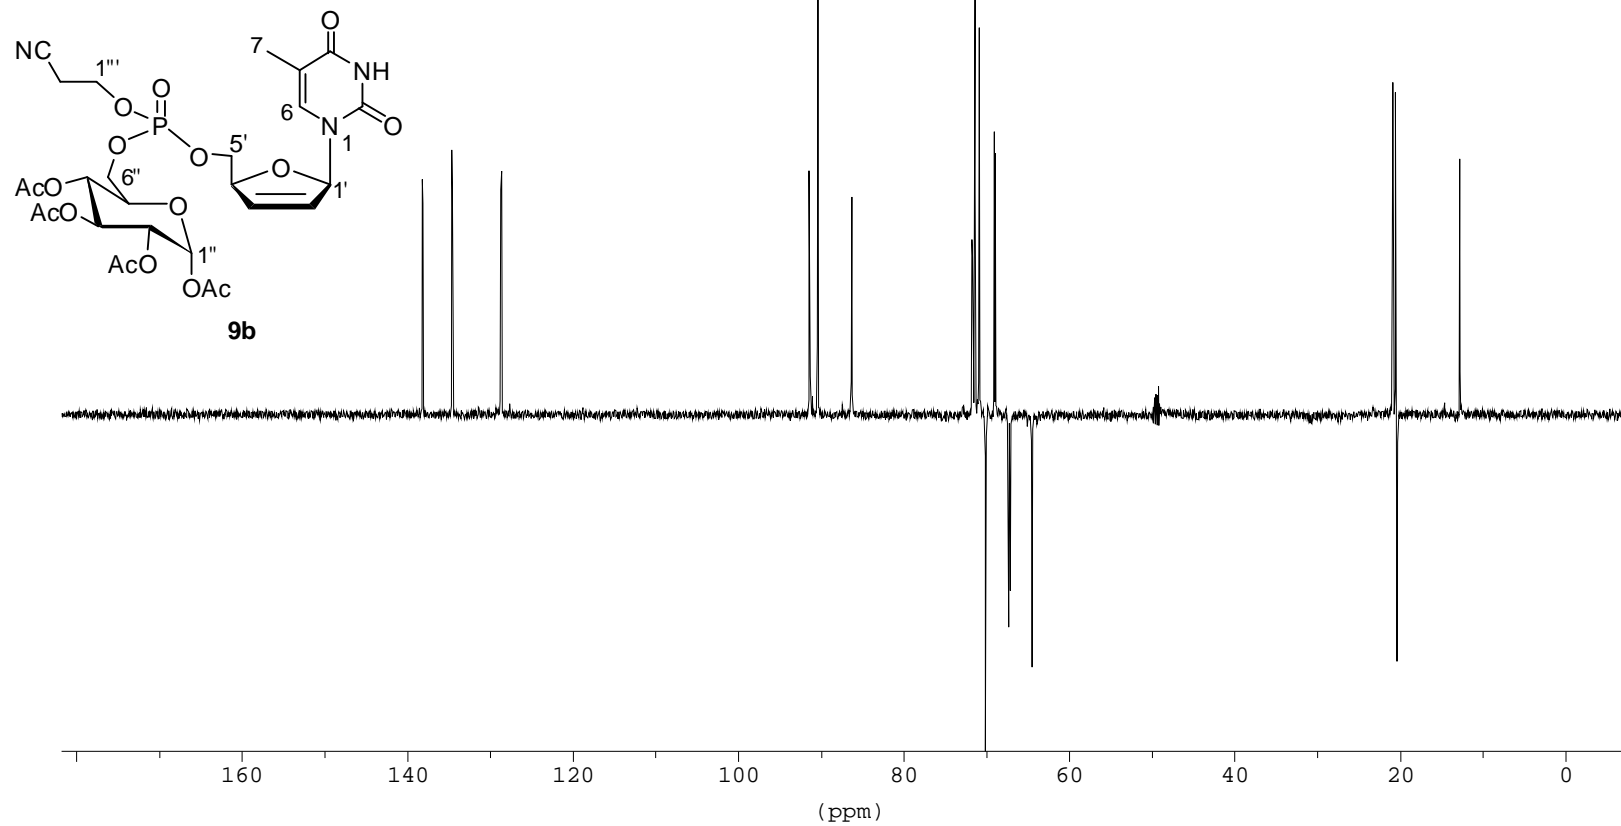

2-Cyanoethyl-(2',3'-dideoxythymidin-5'-yl)-1,2,3,4-tetra-*O*-acetyl- $\alpha$ -D-glucopyranos-6-yl phosphate (9b)

$^{31}\text{P}$ -RMN (MeOH- $d_4$ , 242.9 MHz)

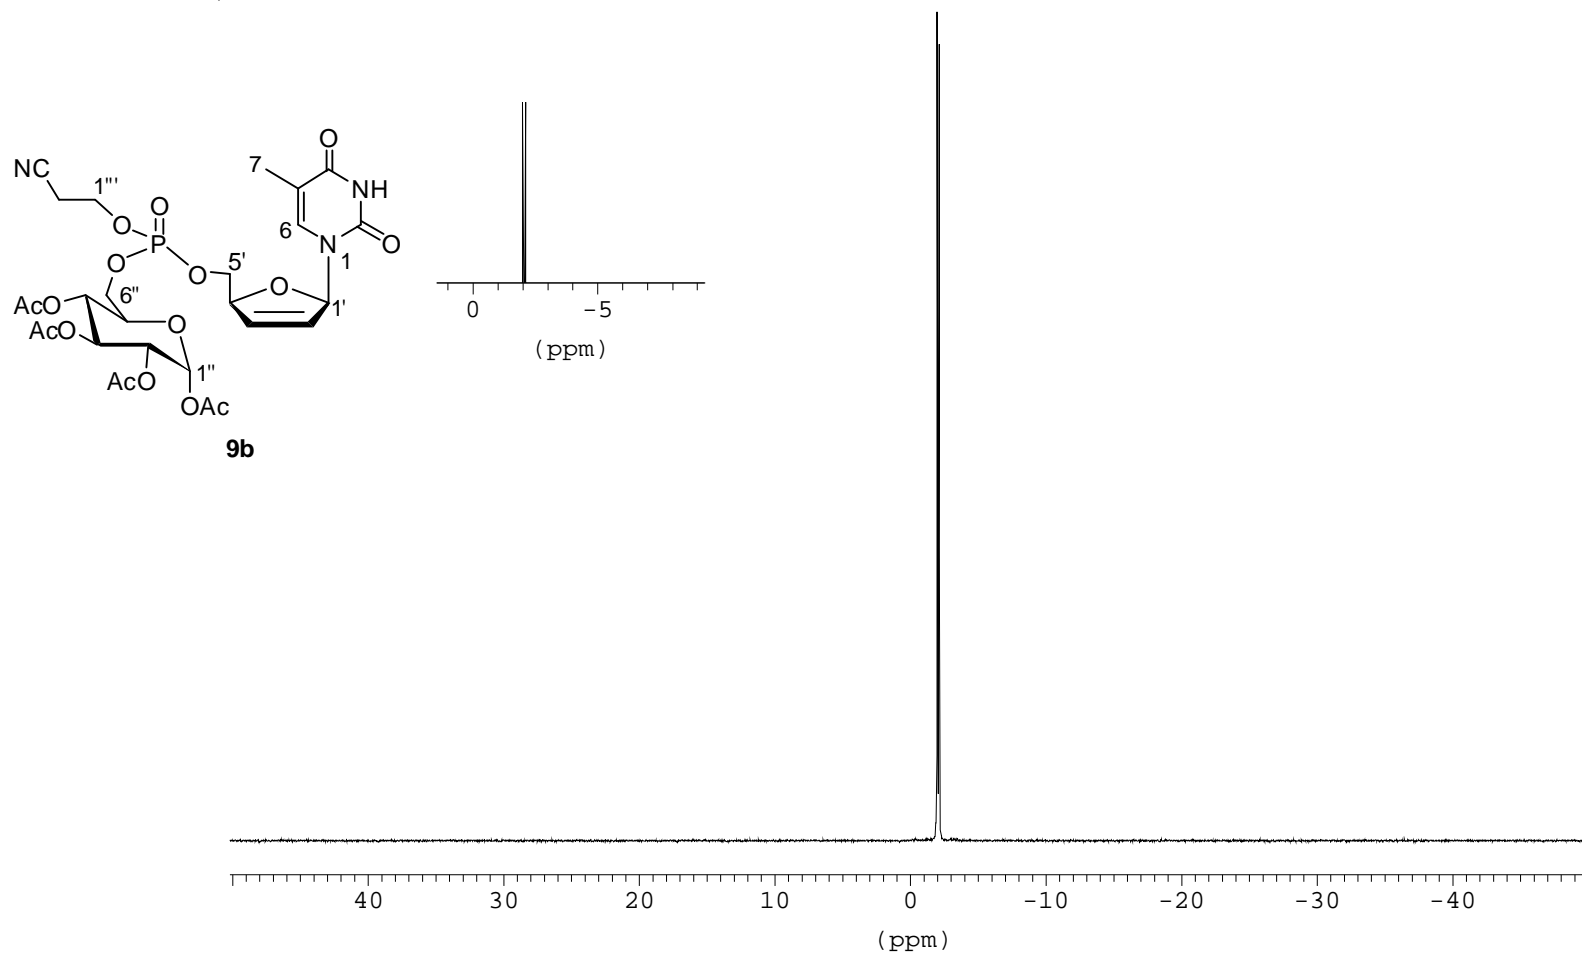

2-Cyanoethyl-(2',3'-didehydro-2',3'-dideoxythymidin-5'-yl)-1,2,3,4-tetra-*O*-acetyl- $\alpha$ -D-glucopyranos-6-yl phosphate (9b)

COSY (MeOH- $d_4$ , 600 MHz)

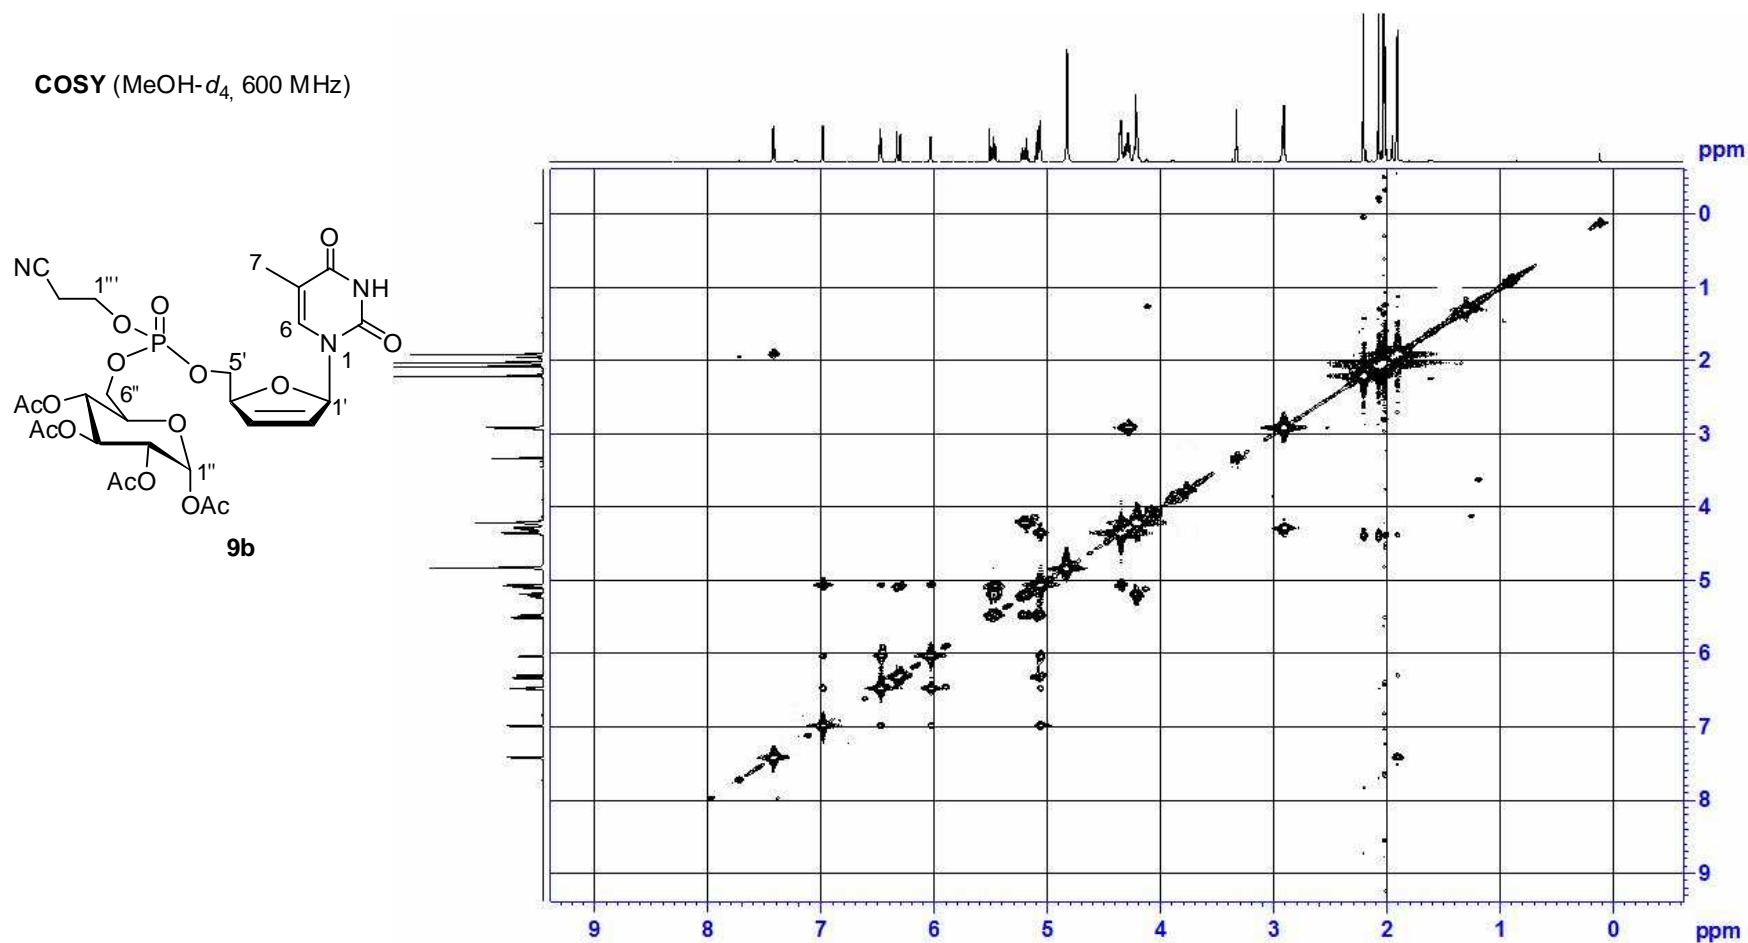

2-Cyanoethyl-(2',3'-didehydro-2',3'-dideoxythymidin-5'-yl)-1,2,3,4-tetra-*O*-acetyl- $\alpha$ -D-glucopyranos-6-yl phosphate (9b)

HSQC (MeOH- $d_4$ , 600 MHz)

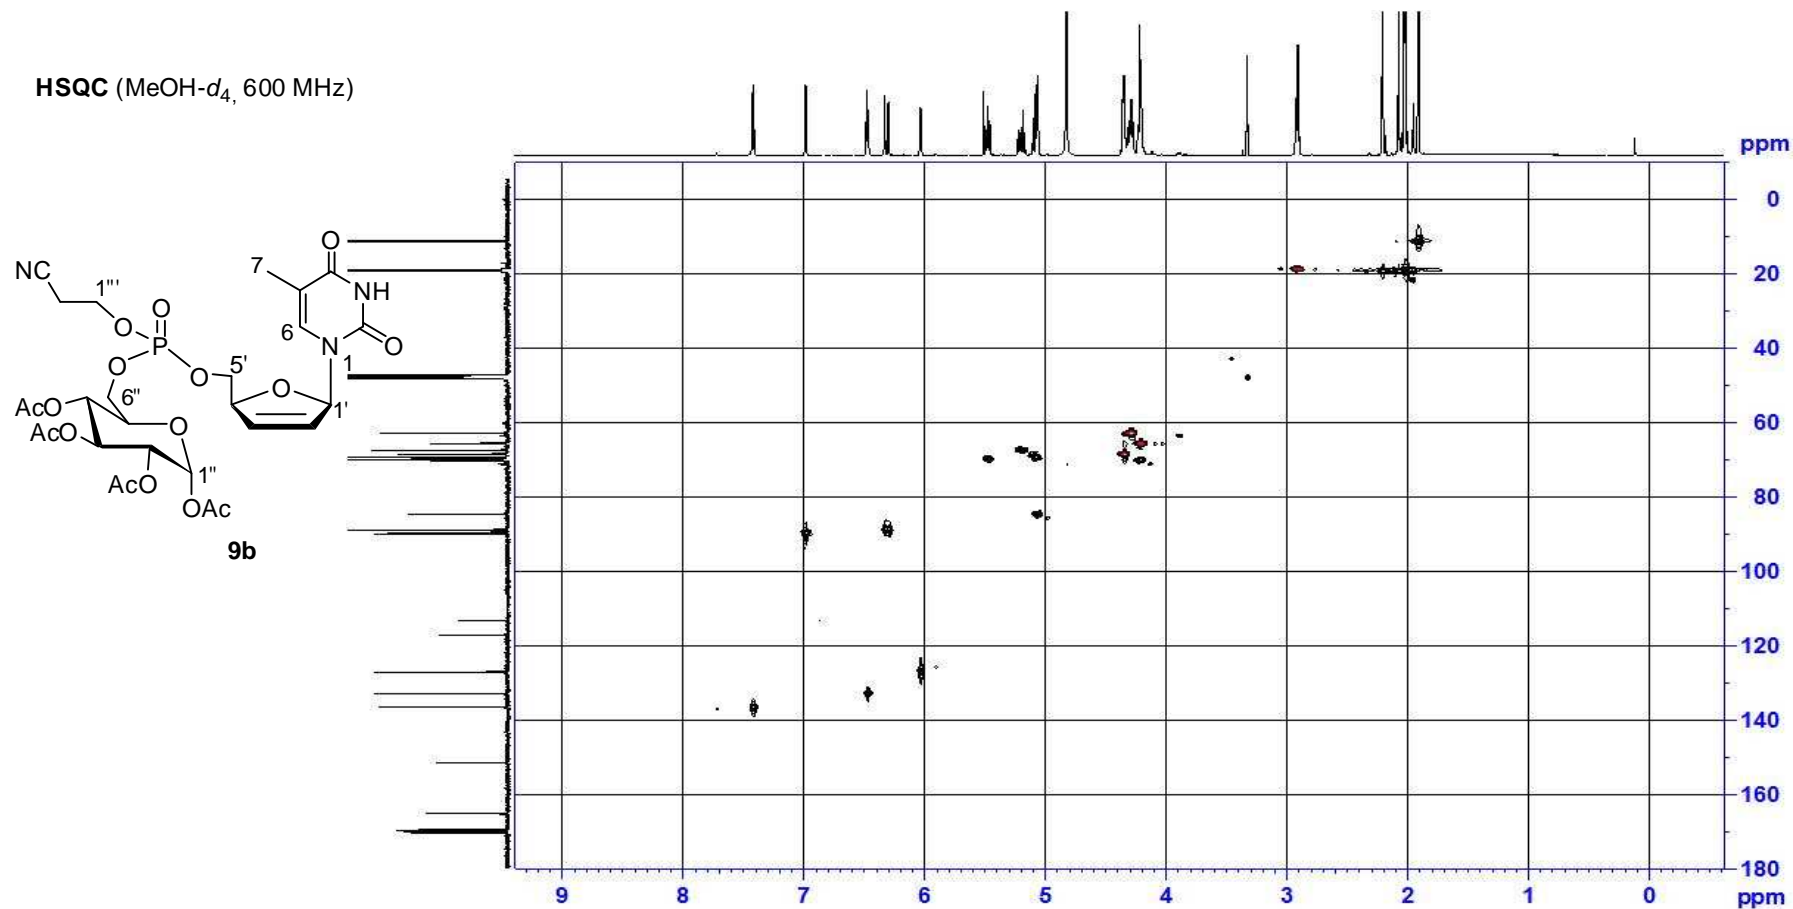



2-Cyanoethyl-(2',3'-didehydro-2',3'-dideoxythymidin-5'-yl)-1,2,3,4-tetra-*O*-acetyl- $\alpha$ -D-glucopyranos-6-yl phosphate (9b)

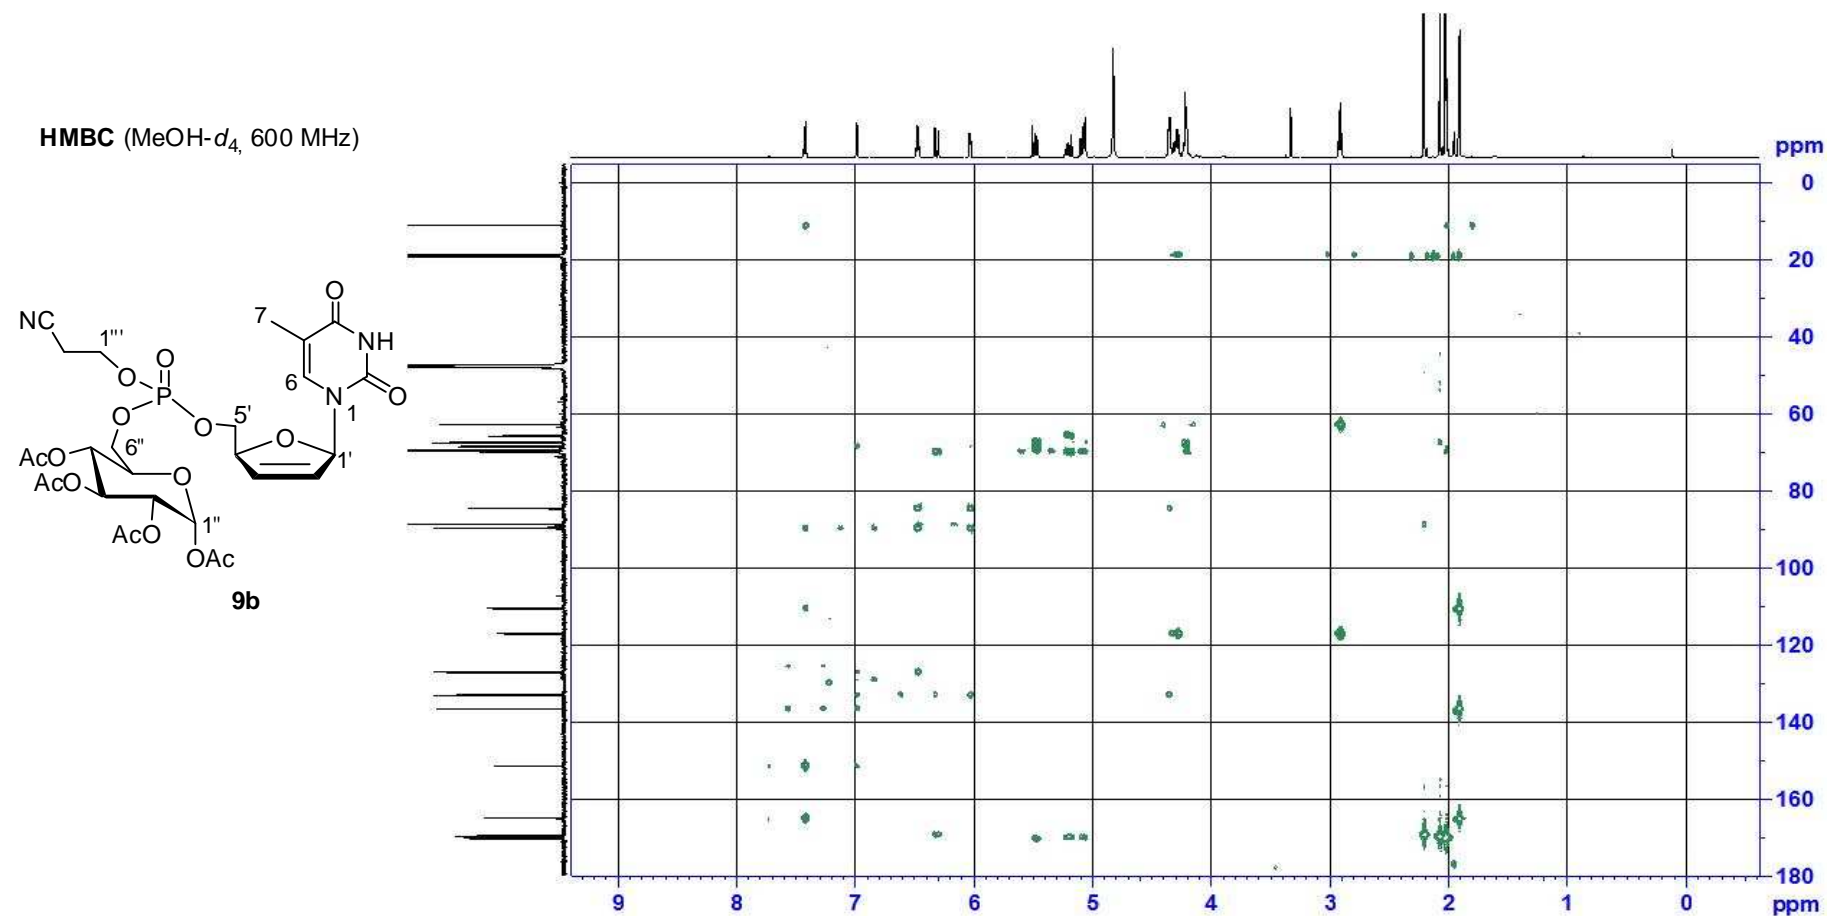

2-Cyanoethyl-(3'-*O*-levulinyl-5-iodo-2'-deoxyuridin-5'-yl)-1,2,3,4-tetra-*O*-acetyl- $\alpha$ -D-glucopyranos-6-yl phosphate (**9c**)

$^1\text{H-RMN}$  (MeOH- $d_4$ , 600 MHz)

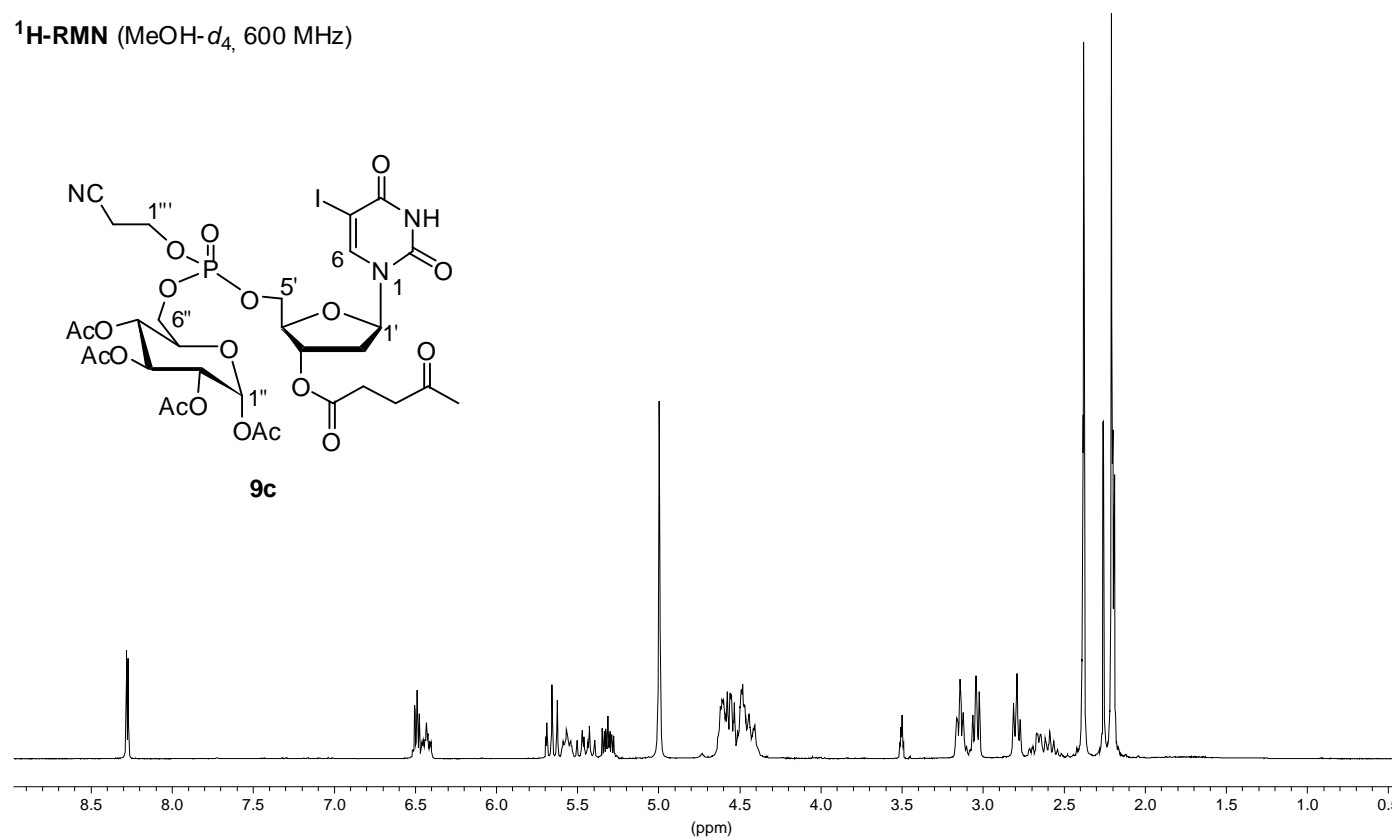

2-Cyanoethyl-(3'-*O*-levulinyl-5-iodo-2'-deoxyuridin-5'-yl)-1,2,3,4-tetra-*O*-acetyl- $\alpha$ -D-glucopyranos-6-yl phosphate (**9c**)

$^{13}\text{C}$ -RMN (MeOH- $d_4$ , 150.5 MHz)

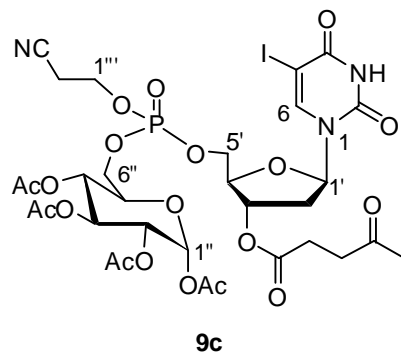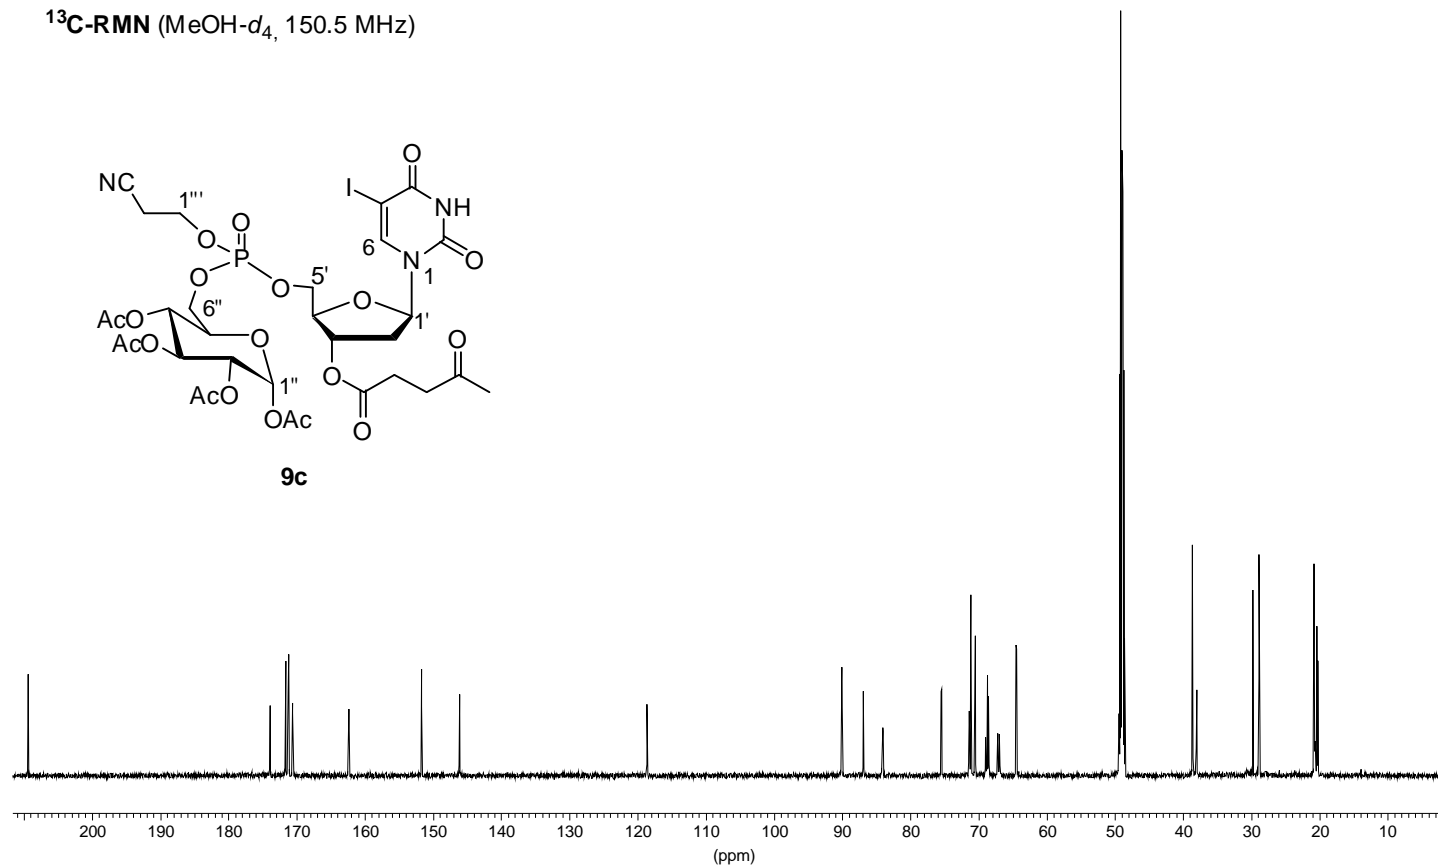

**2-Cyanoethyl-(3'-*O*-levulinyl-5-iodo-2'-deoxyuridin-5'-yl)-1,2,3,4-tetra-*O*-acetyl- $\alpha$ -D-glucopyranos-6-yl phosphate (**9c**)**

DEPT (MeOH- $d_4$ , 150.5 MHz)

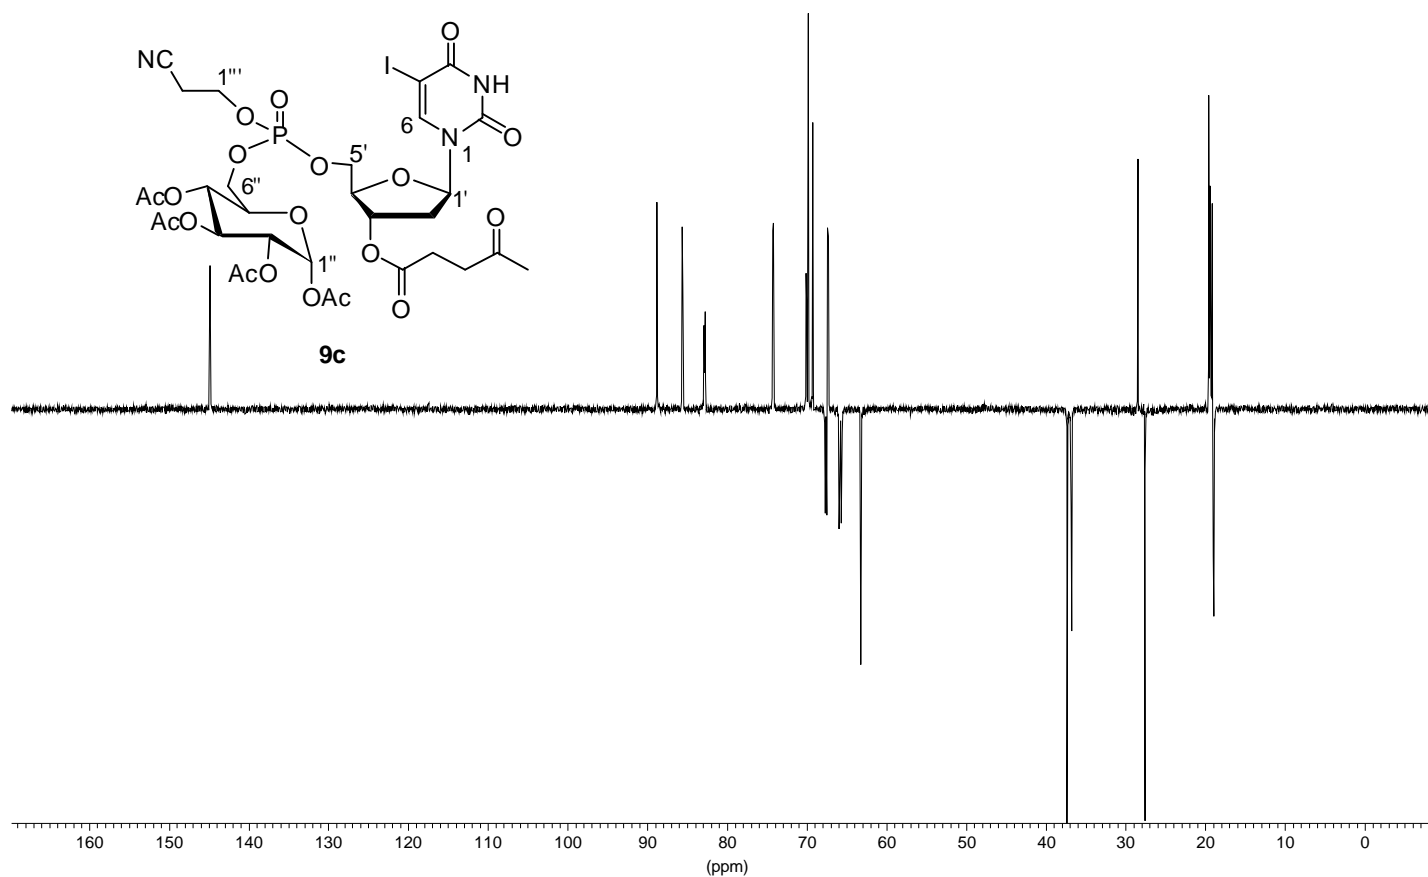

2-Cyanoethyl-(3'-*O*-levulinyl-5-iodo-2'-deoxyuridin-5'-yl)-1,2,3,4-tetra-*O*-acetyl- $\alpha$ -D-glucopyranos-6-yl phosphate (**9c**)

$^{31}\text{P}$ -RMN (MeOH- $d_4$ , 242.9 MHz)

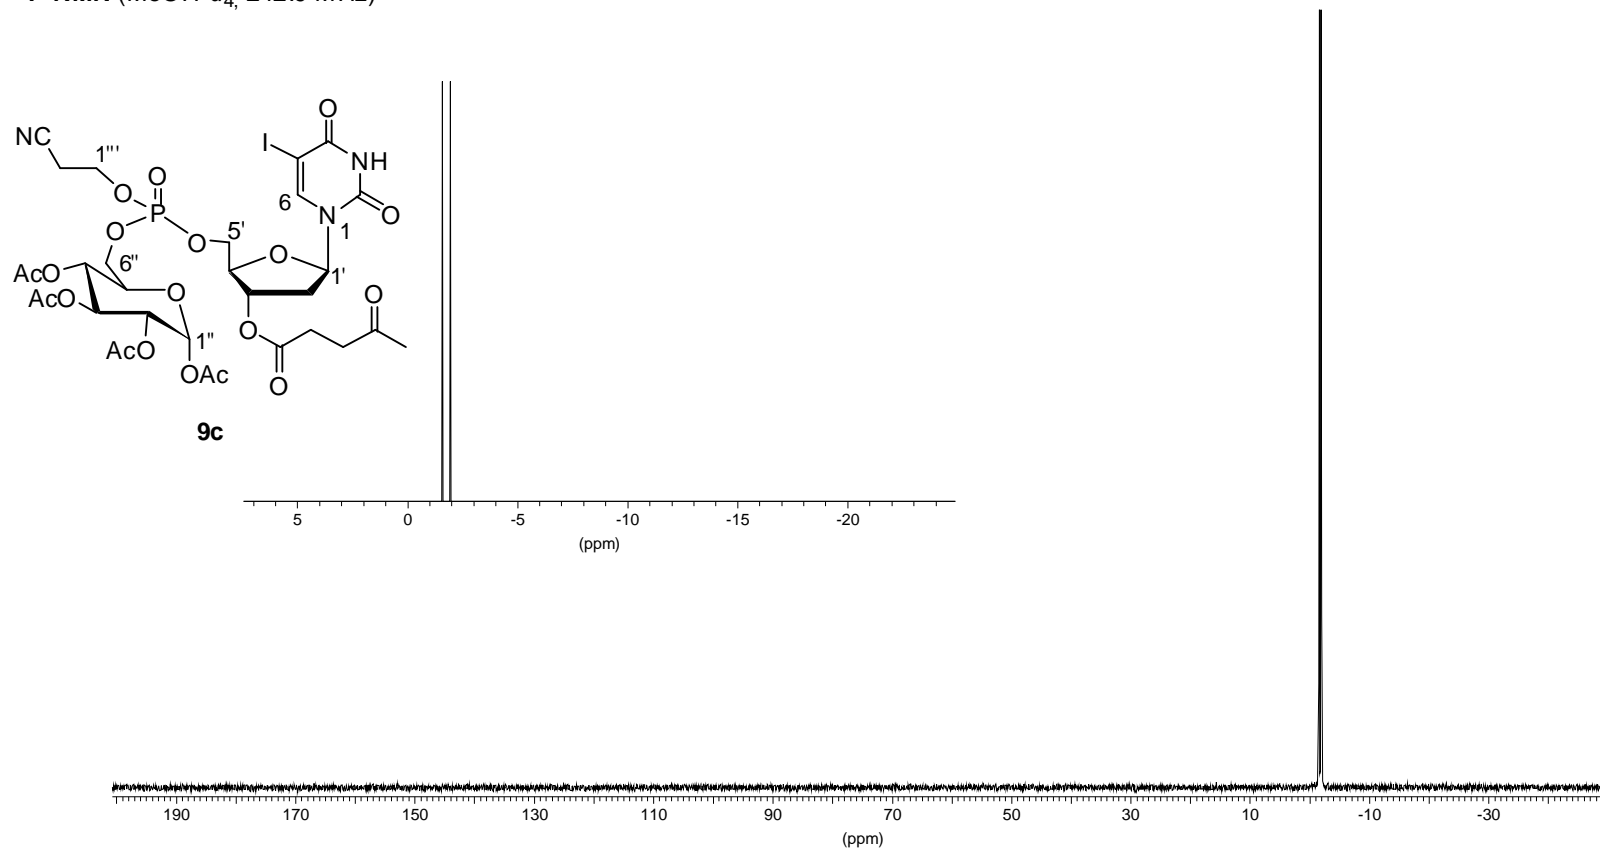

**-Cynoethyl-(3'-*O*-levulinyl-5-iodo-2'-deoxyuridin-5'-yl)-1,2,3,4-tetra-*O*-acetyl- $\alpha$ -D-glucopyranos-6-yl phosphate (9c)**

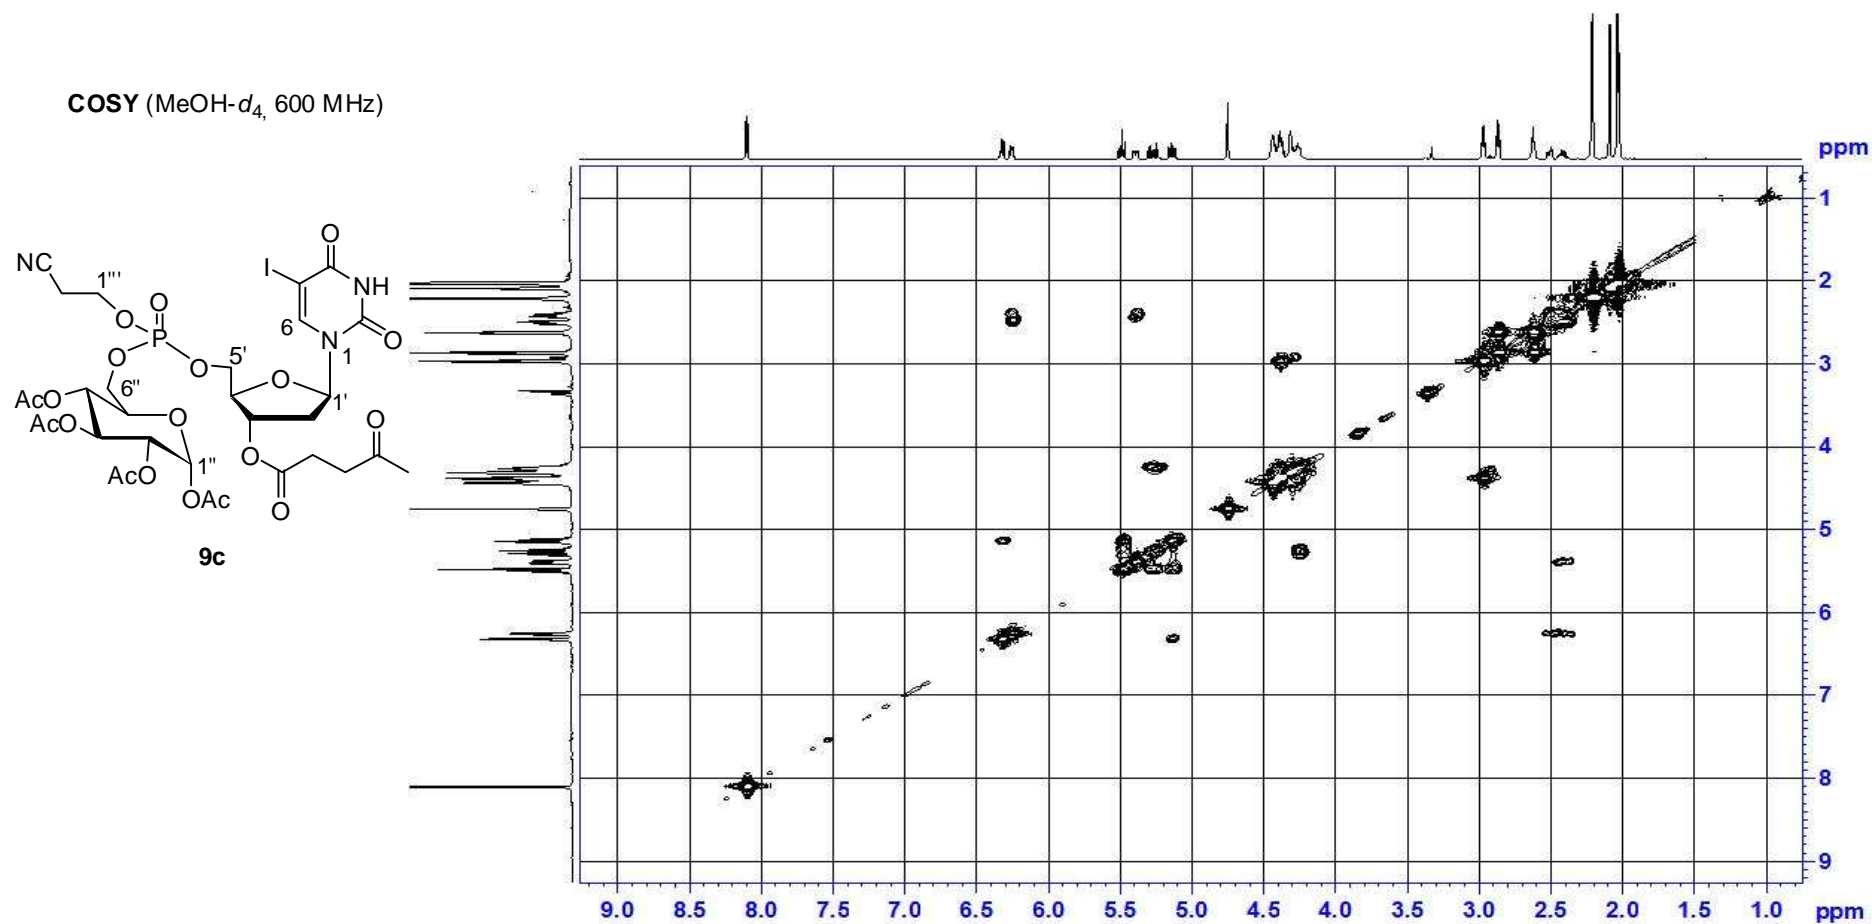

**-Cyanoethyl-(3'-*O*-levulinyl-5-iodo-2'-deoxyuridin-5'-yl)-1,2,3,4-tetra-*O*-acetyl- $\alpha$ -D-glucopyranos-6-yl phosphate (9c)**

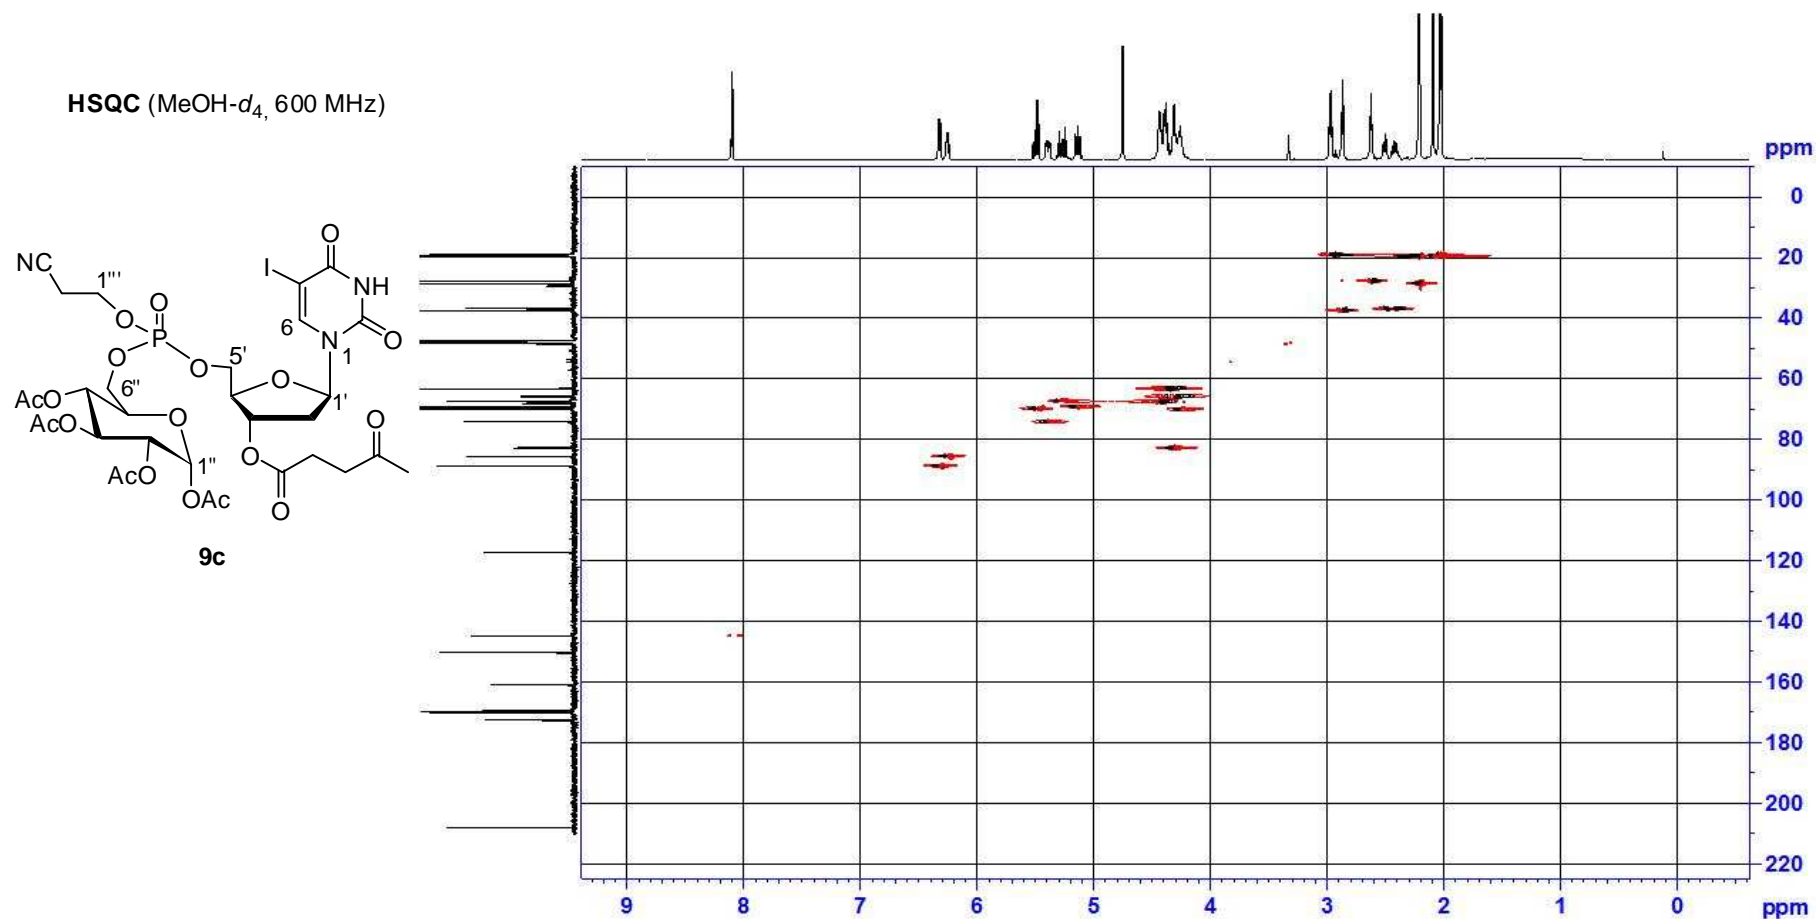

-Cyanoethyl-(3'-*O*-levulinyl-5-iodo-2'-deoxyuridin-5'-yl)-1,2,3,4-tetra-*O*-acetyl- $\alpha$ -D-glucopyranos-6-yl phosphate (9c)

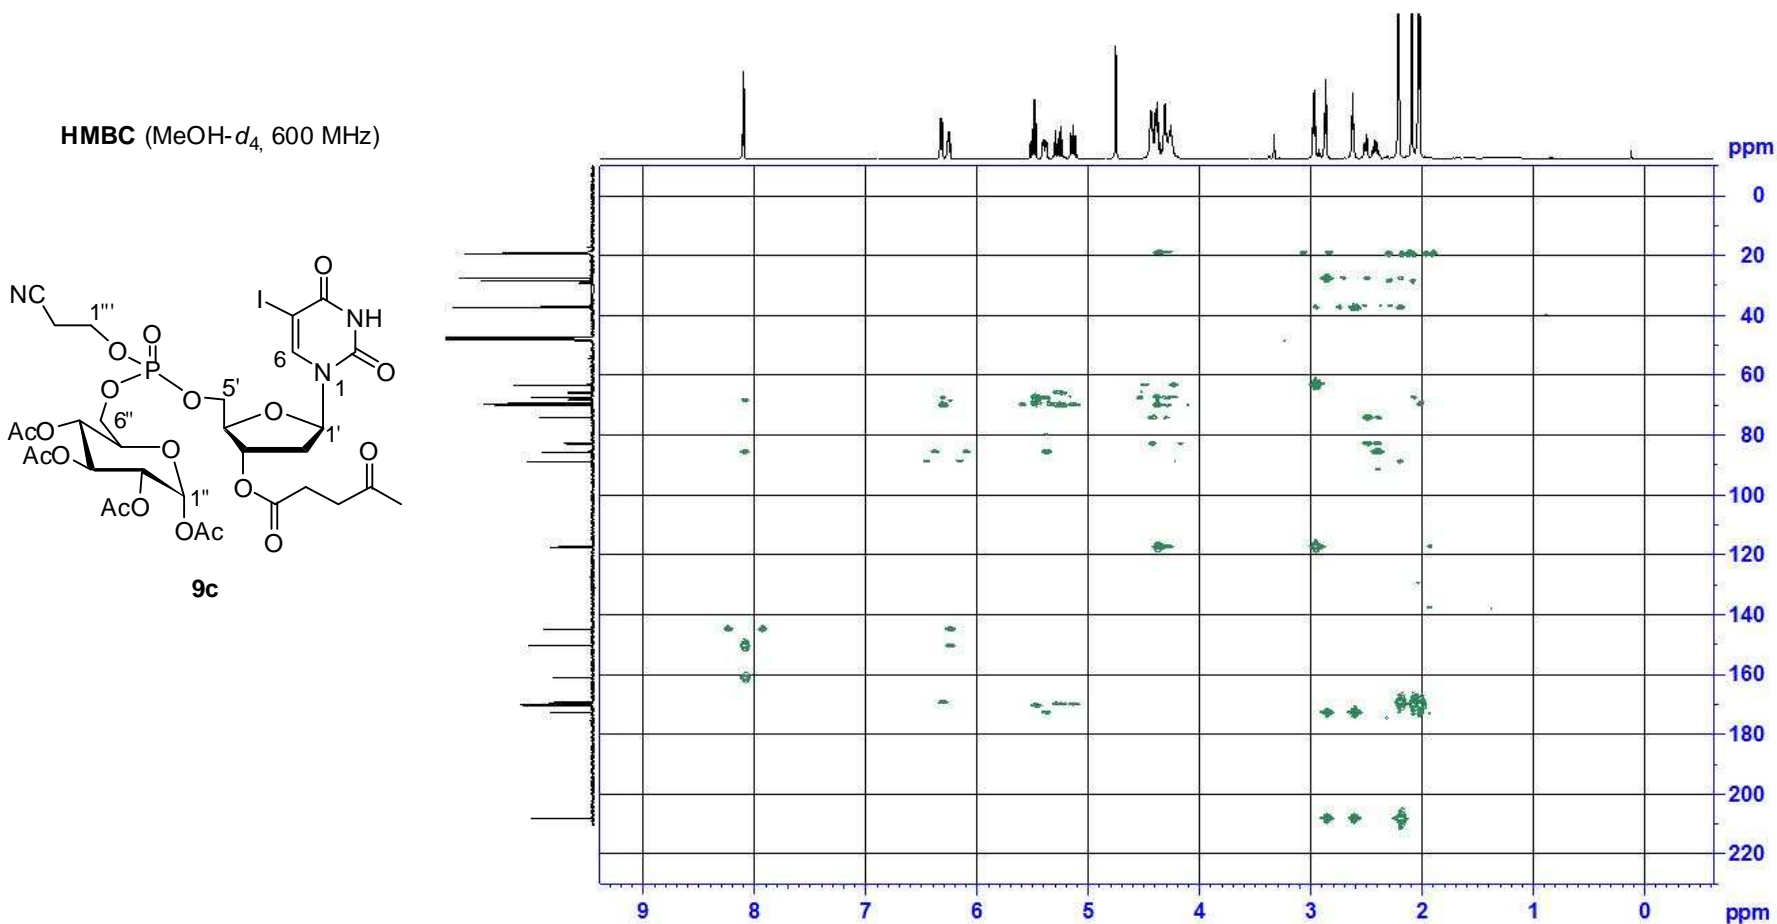



**2-Cyanoethyl-(5'-*O*-levulinyl-5-iodo-2'-deoxyuridin-3'-yl)-1,2,3,4-tetra-*O*-acetyl- $\alpha$ -D-glucopyranos-6-yl phosphate (**9d**)**

<sup>1</sup>H-RMN (MeOH-*d*<sub>4</sub>, 600 MHz)

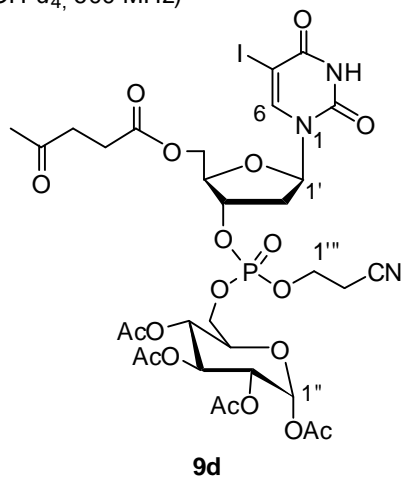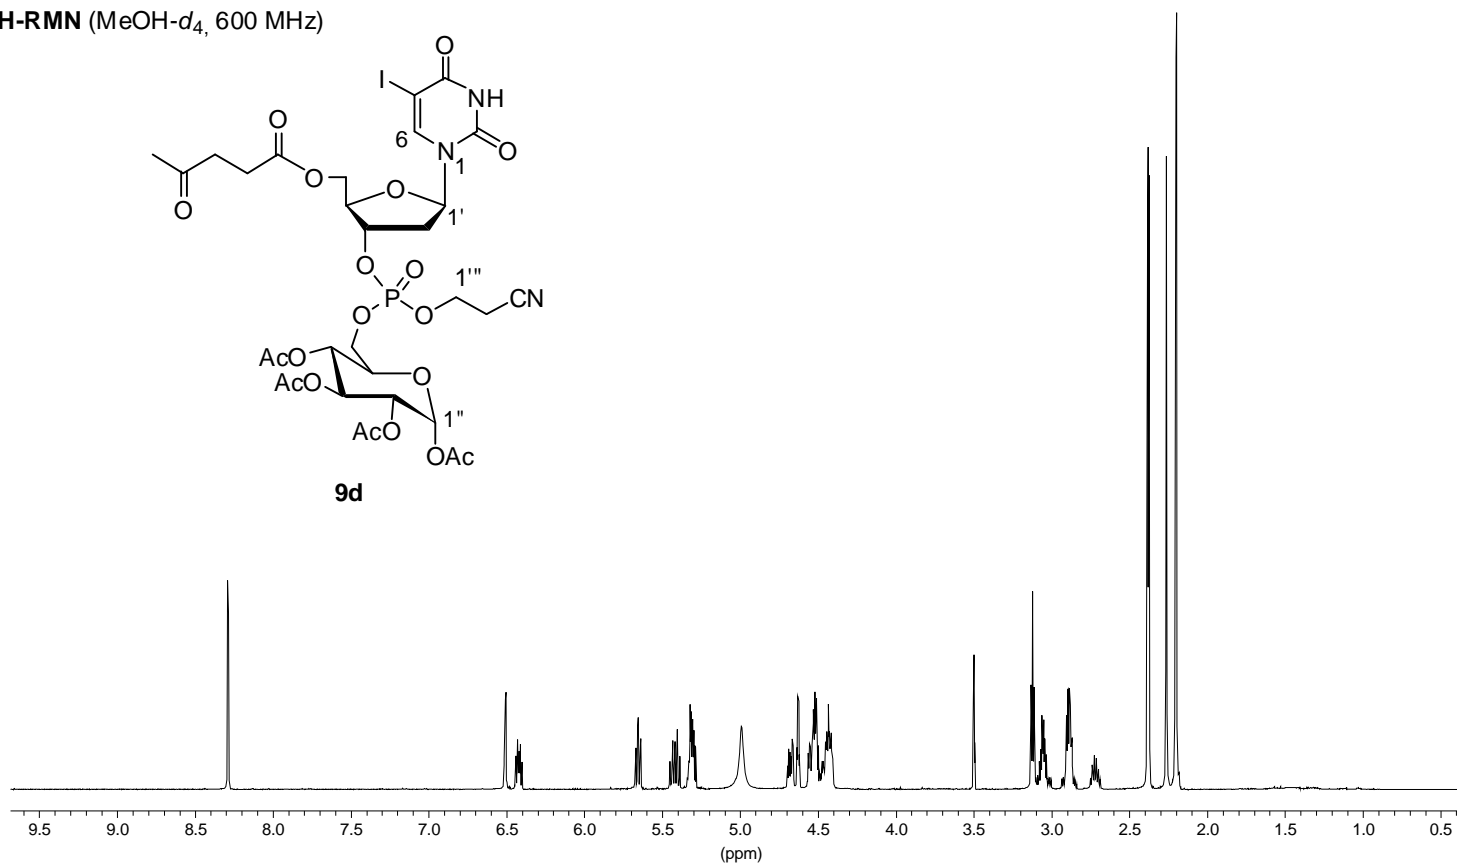

2-Cyanoethyl-(5'-*O*-levulinyl-5-iodo-2'-deoxyuridin-3'-yl)-1,2,3,4-tetra-*O*-acetyl- $\alpha$ -D-glucopyranos-6-yl phosphate (**9d**)

$^{13}\text{C}$ -RMN (MeOH- $d_4$ , 150.5 MHz)

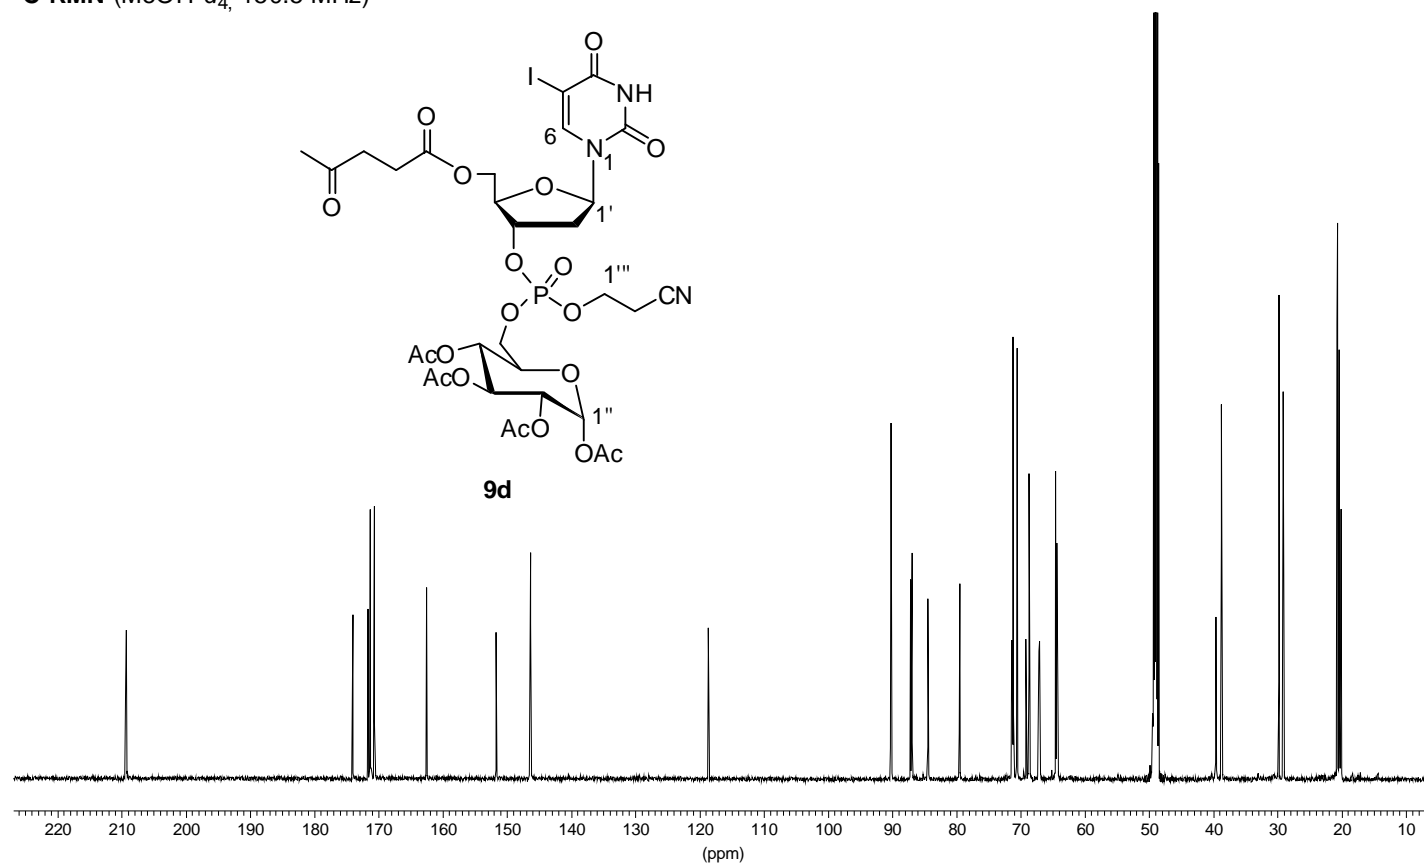

**2-Cyanoethyl-(5'-*O*-levulinyl-5-iodo-2'-deoxyuridin-3'-yl)-1,2,3,4-tetra-*O*-acetyl- $\alpha$ -D-glucopyranos-6-yl phosphate (**9d**)**

DEPT (MeOH-*d*<sub>4</sub>, 150.5 MHz)

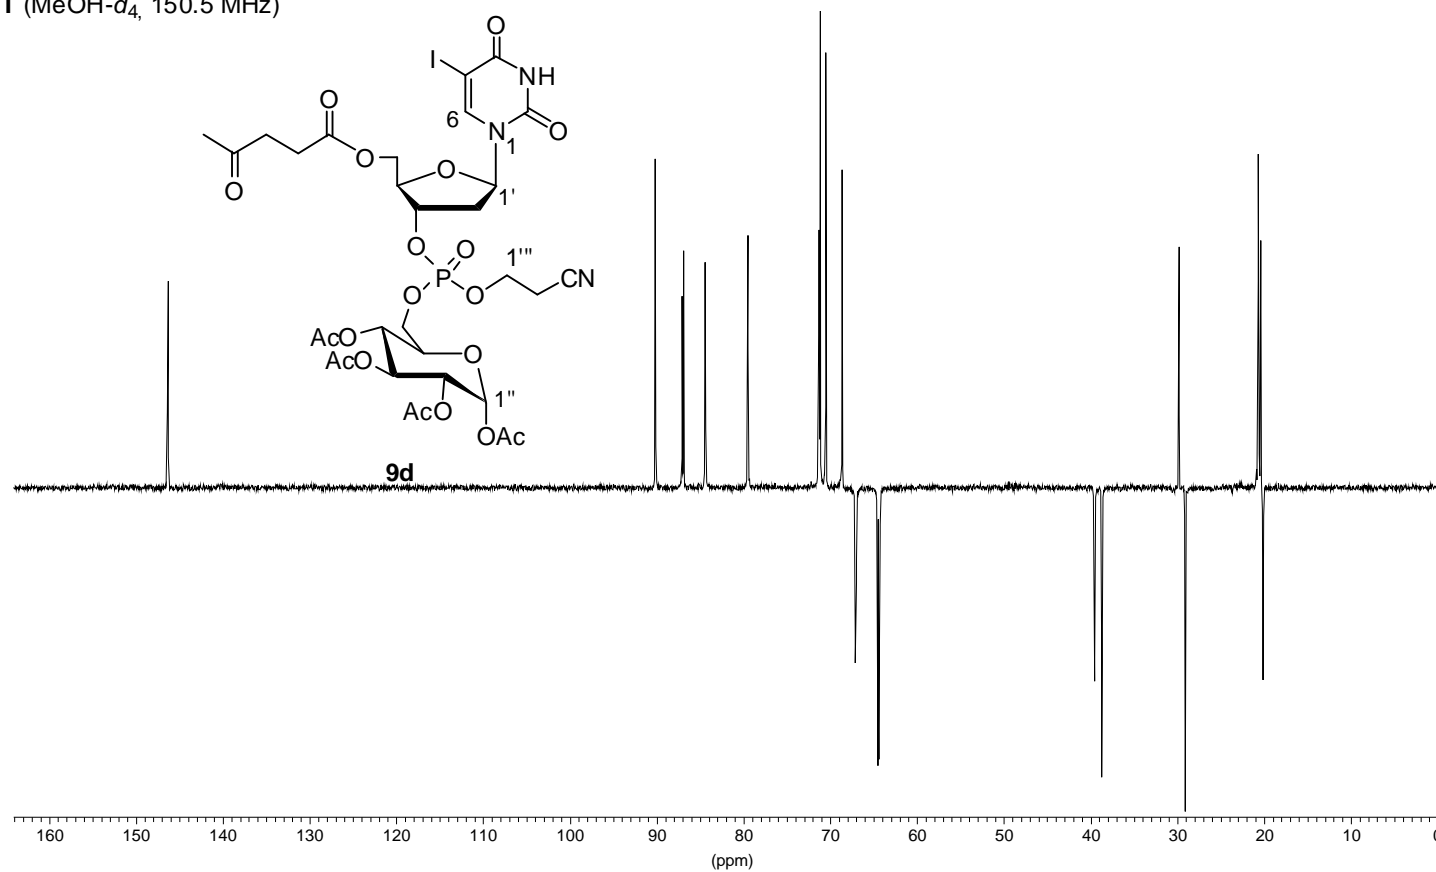

2-Cyanoethyl-(5'-*O*-levulinyl-5-iodo-2'-deoxyuridin-3'-yl)-1,2,3,4-tetra-*O*-acetyl- $\alpha$ -D-glucopyranos-6-yl phosphate (9d)

$^{31}\text{P}$ -RMN (MeOH- $d_4$ , 242.9 MHz)

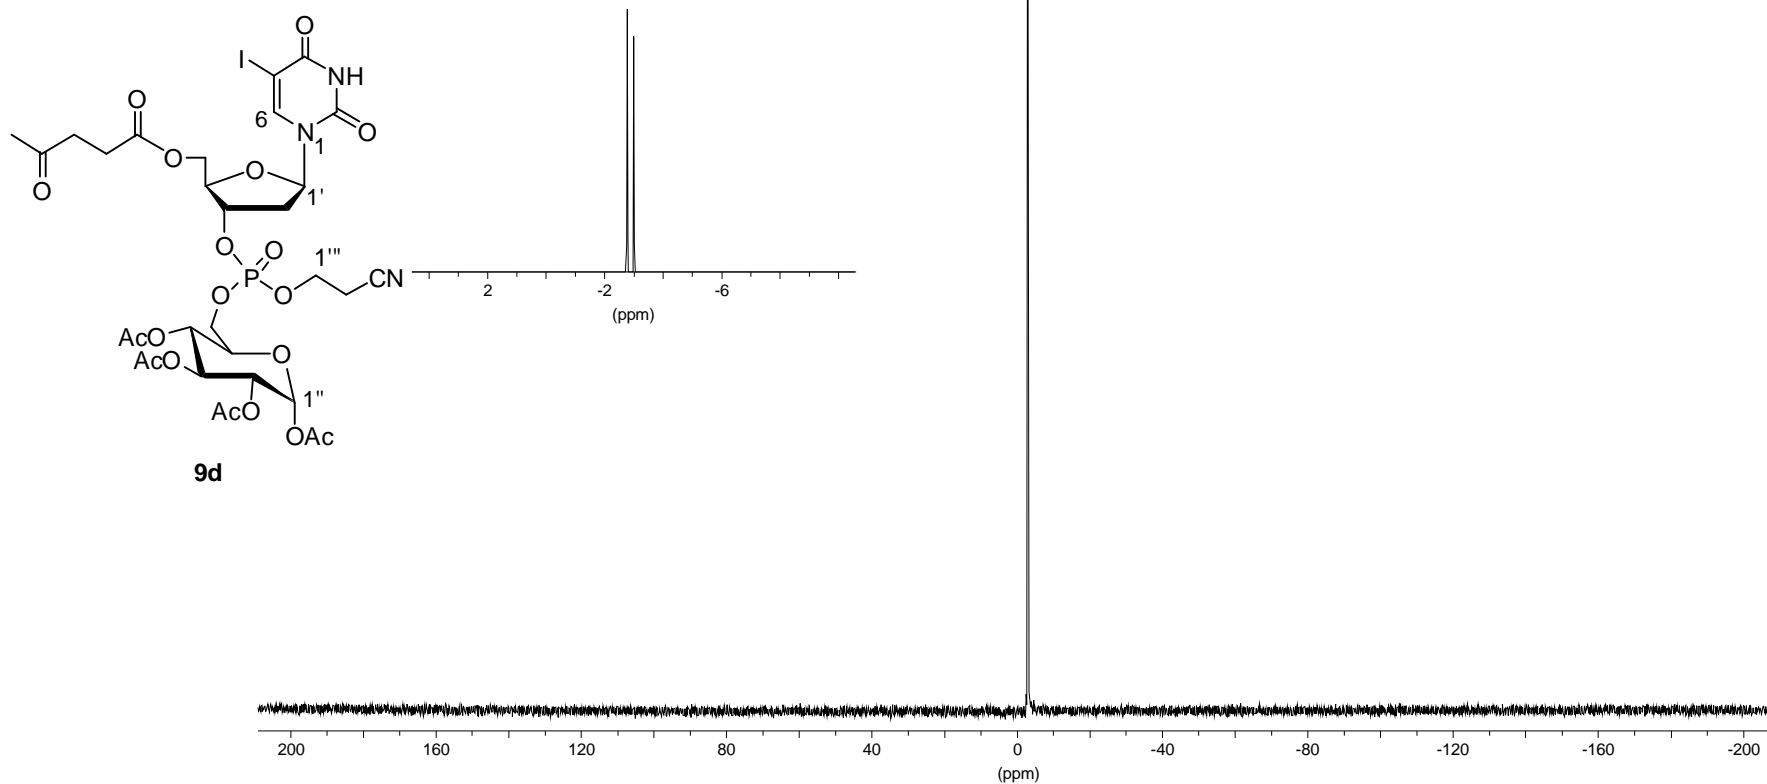

2-Cyanoethyl-(5'-*O*-levulinyl-5-iodo-2'-deoxyuridin-3'-yl)-1,2,3,4-tetra-*O*-acetyl- $\alpha$ -D-glucopyranos-6-yl phosphate (9d)

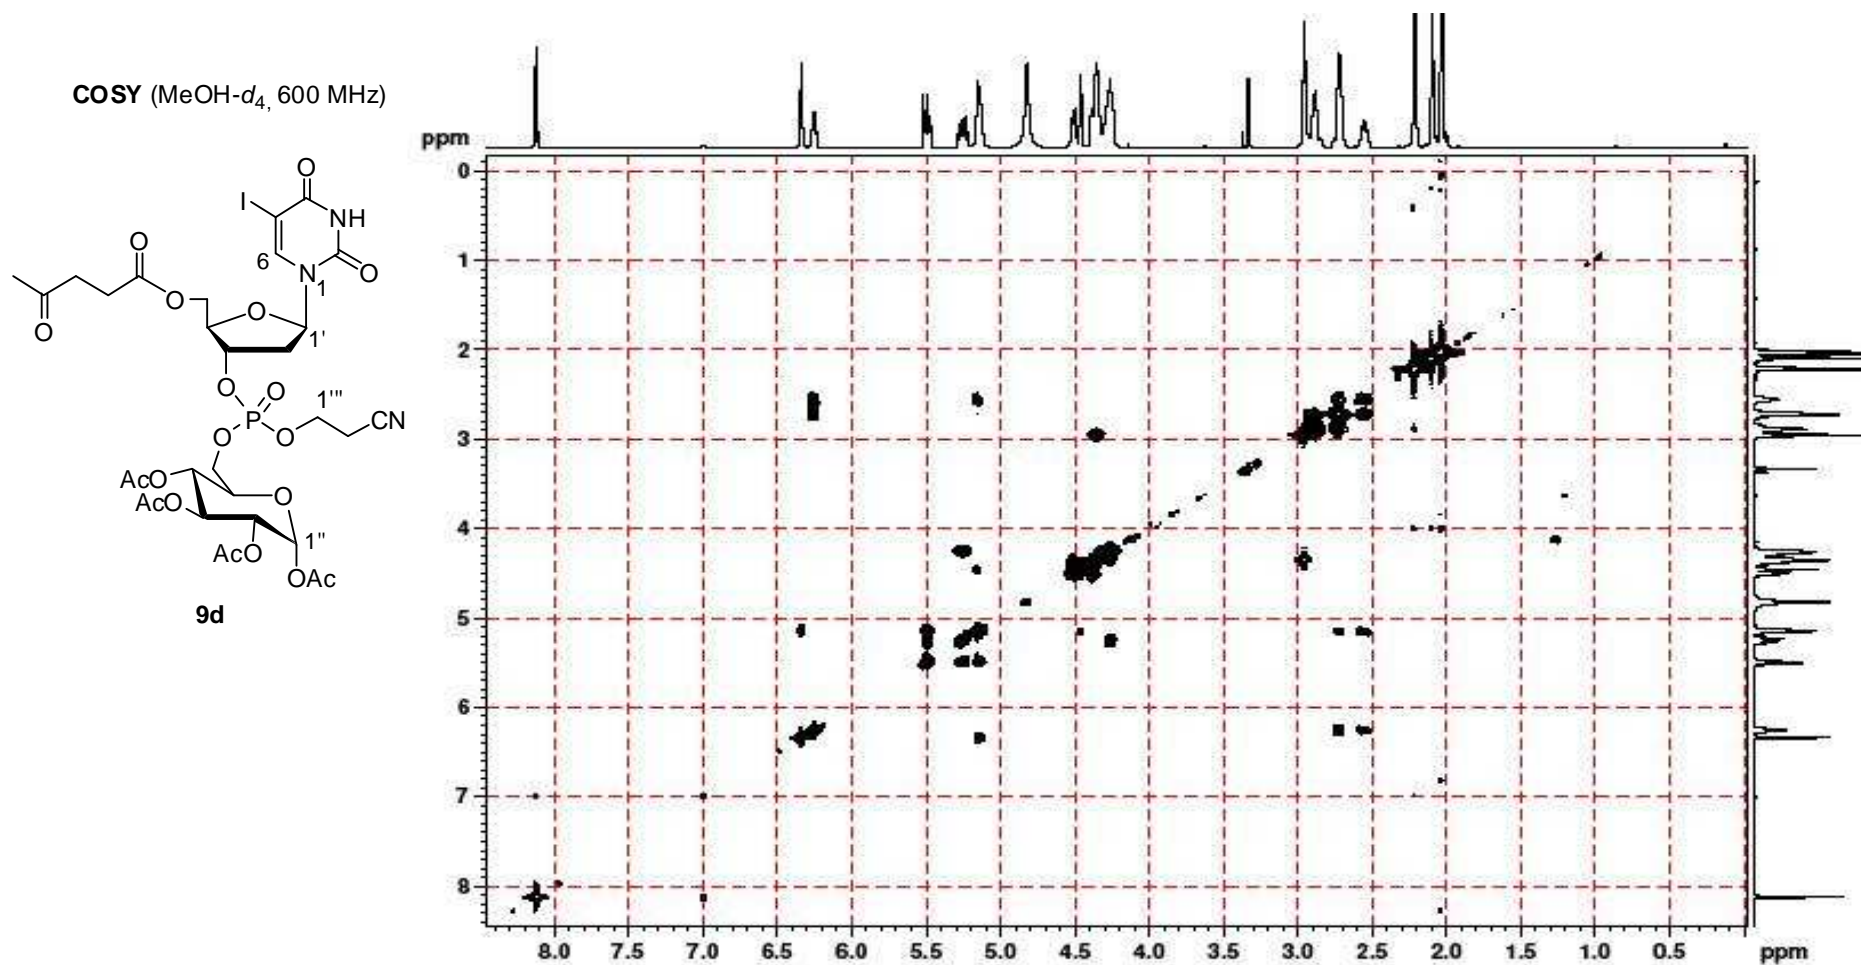

2-Cyanoethyl-(5'-*O*-levulinyl-5-iodo-2'-deoxyuridin-3'-yl)-1,2,3,4-tetra-*O*-acetyl- $\alpha$ -D-glucopyranos-6-yl phosphate (9d)

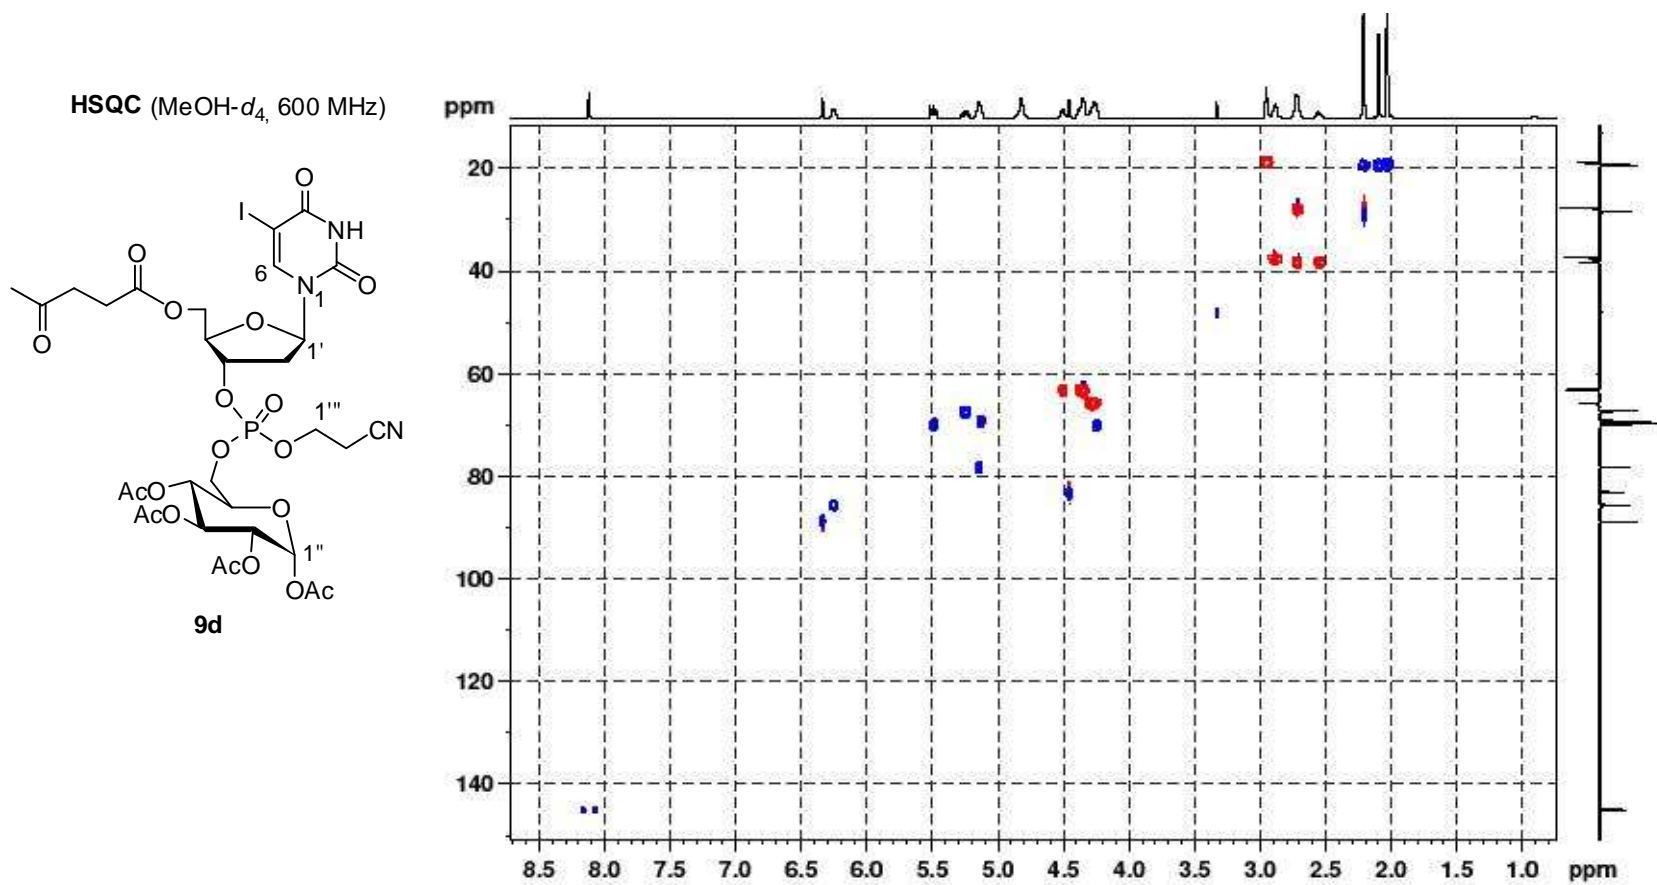

2-Cyanoethyl-(5'-*O*-levulinyl-5-iodo-2'-deoxyuridin-3'-yl)-1,2,3,4-tetra-*O*-acetyl- $\alpha$ -D-glucopyranos-6-yl phosphate (9d)

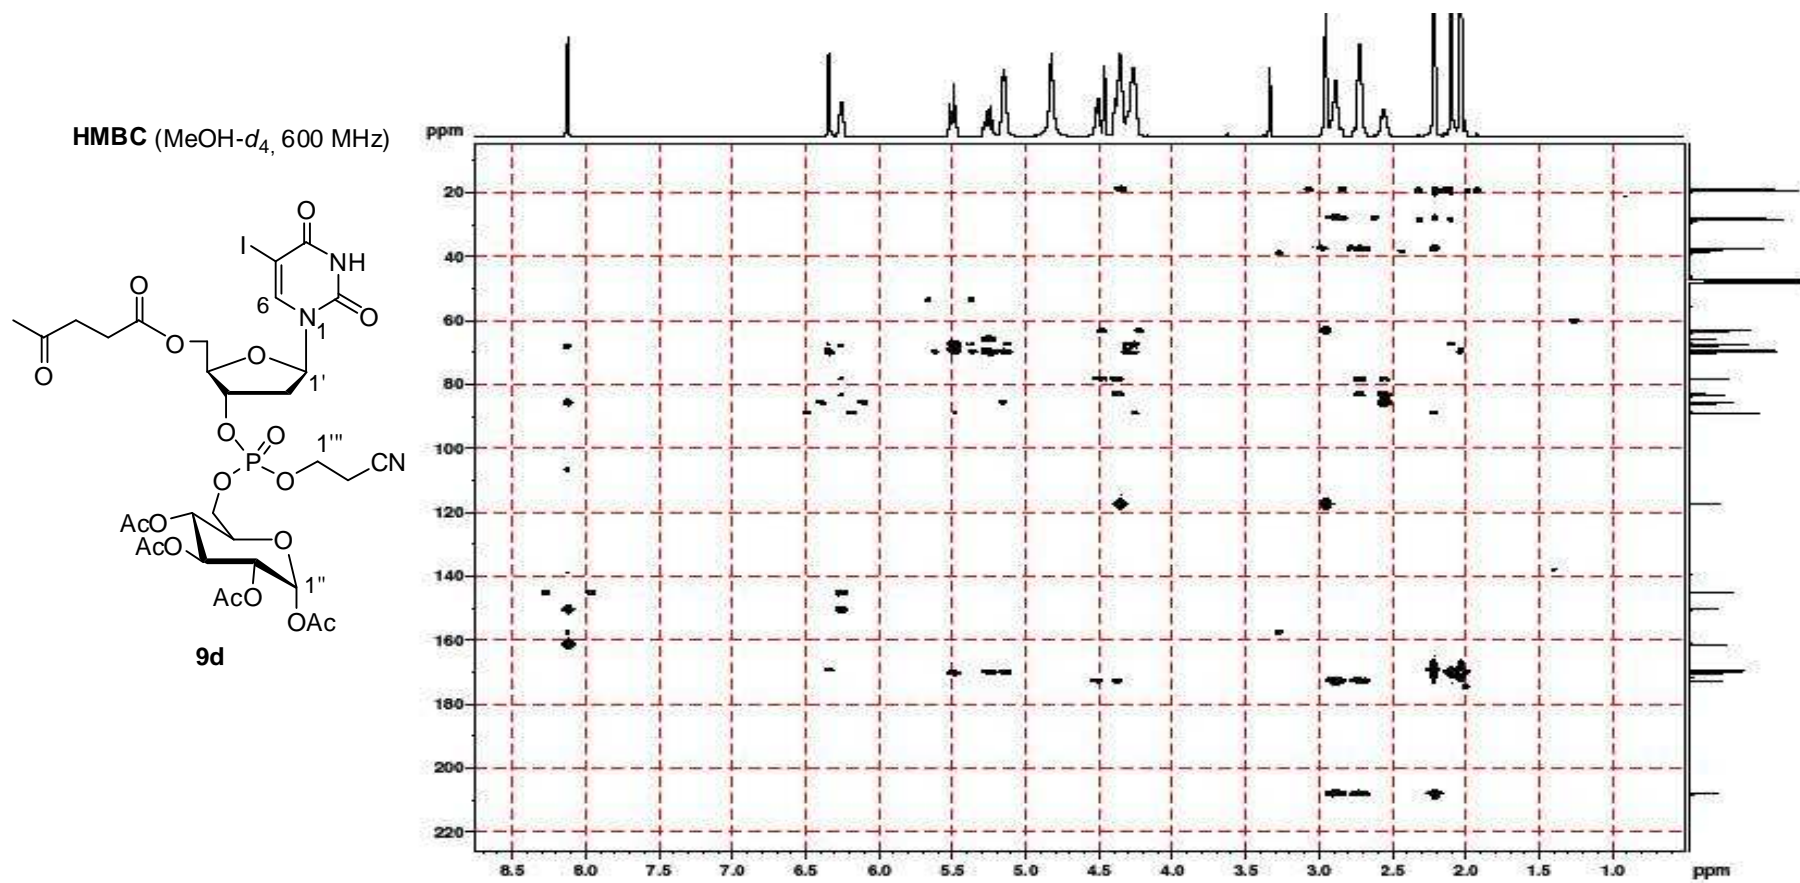

**2-Cyanoethyl-(2',3'-dideoxyinosin-5'-yl)-1,2,3,4-tetra-*O*-acetyl- $\alpha$ -D-glucopyranos-6-yl phosphate (9e)**

<sup>1</sup>H-RMN (MeOH-*d*<sub>4</sub>, 600 MHz)

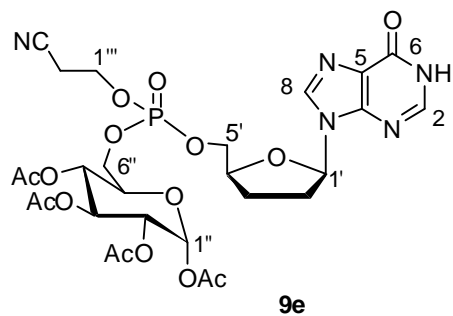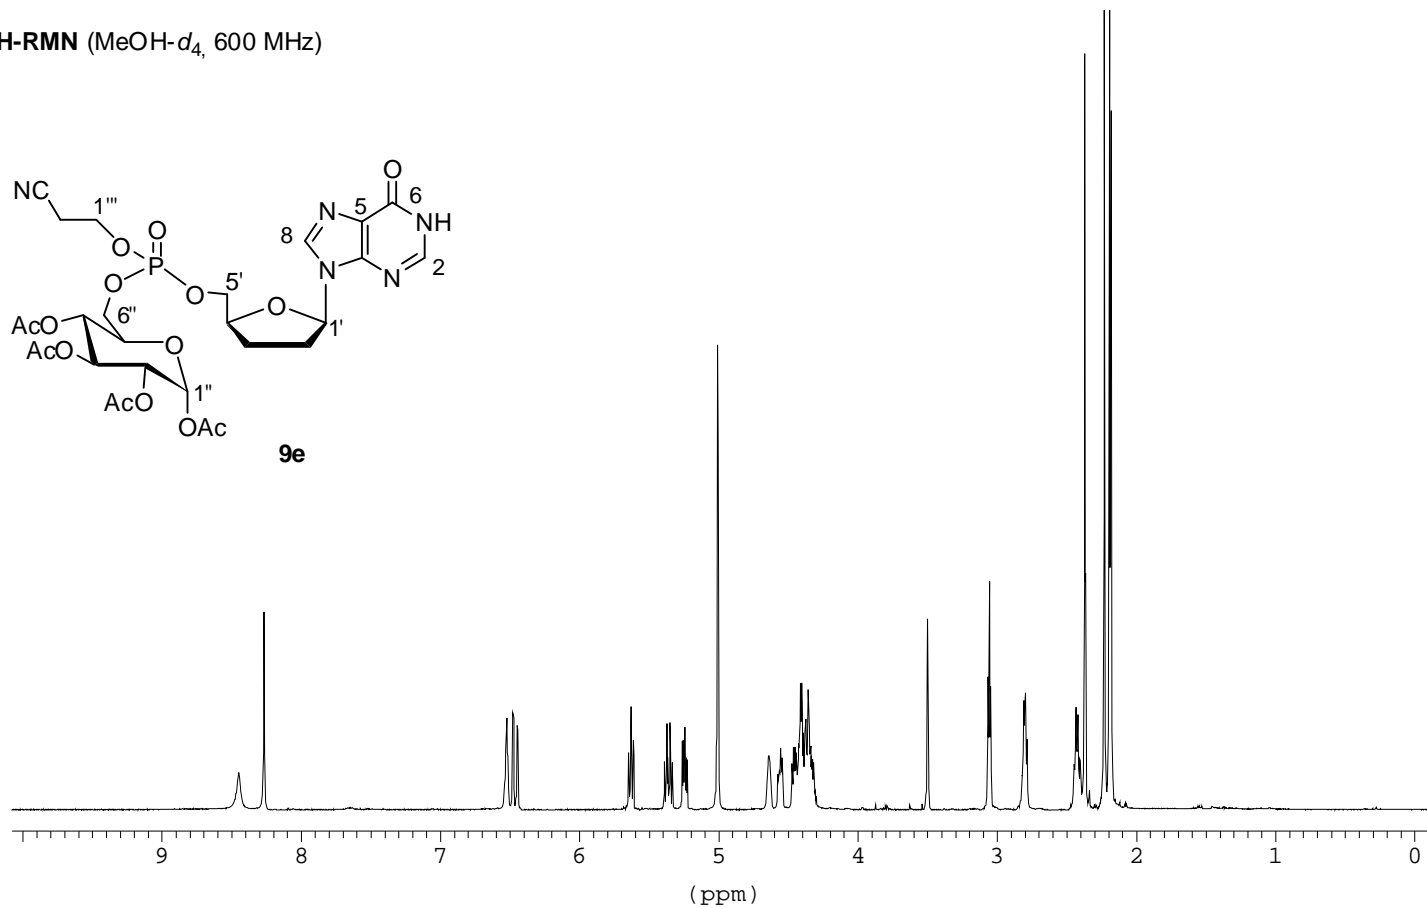



**2-Cyanoethyl-(2',3'-dideoxyinosin-5'-yl)-1,2,3,4-tetra-*O*-acetyl- $\alpha$ -D-glucopyranos-6-yl phosphate (9e)**

$^{13}\text{C}$ -RMN (MeOH- $d_4$ , 150.5 MHz)

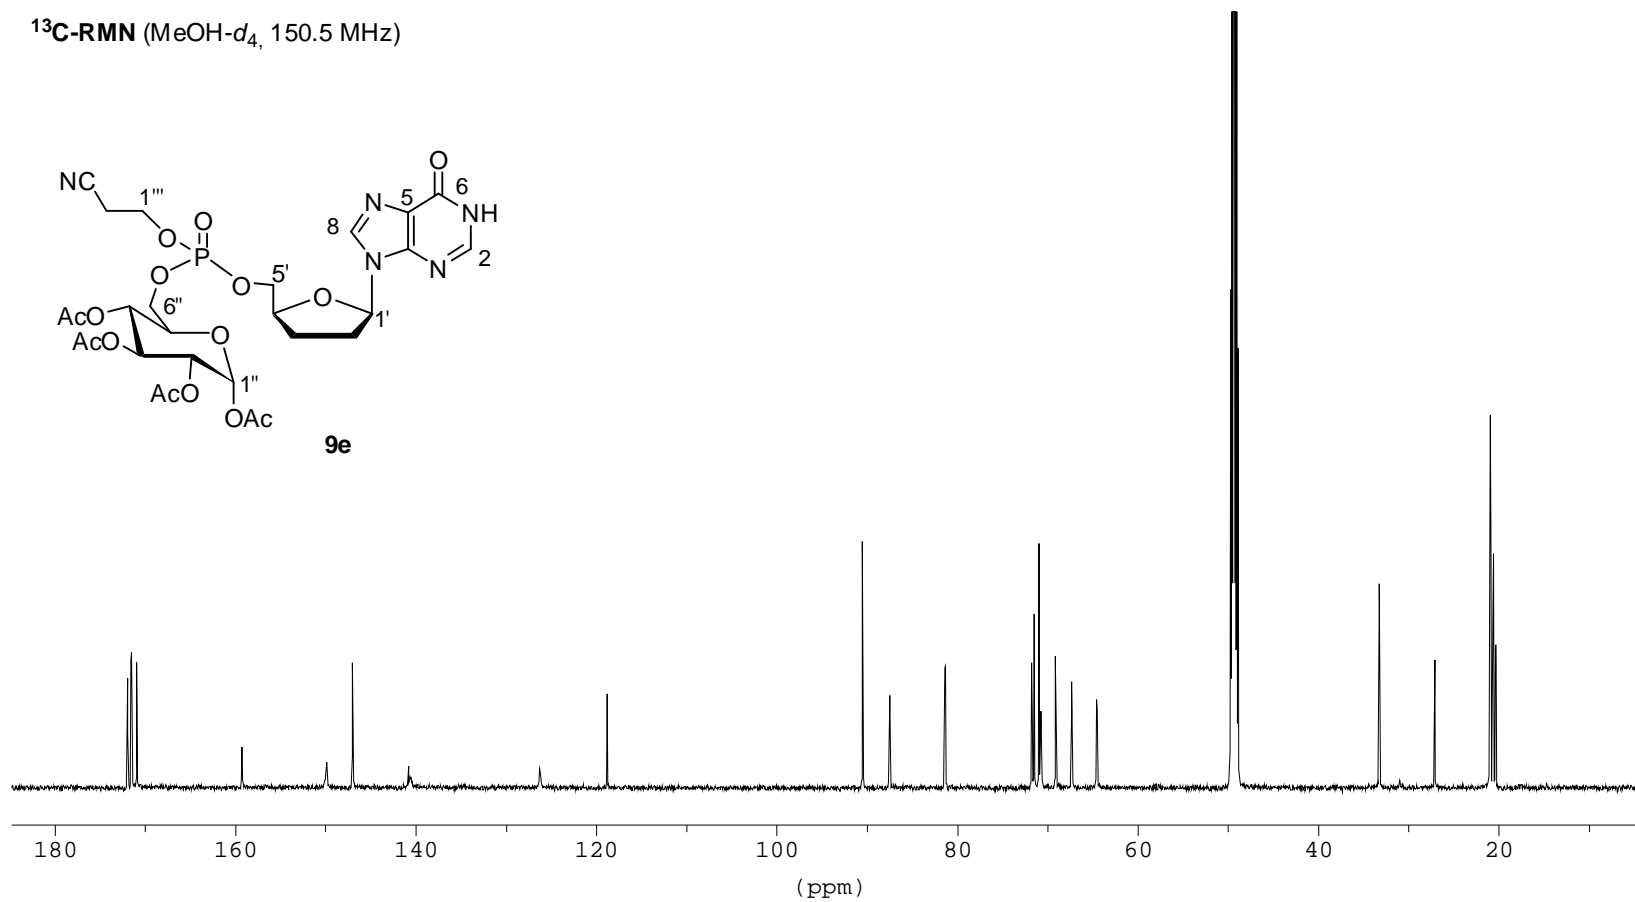

**2-Cyanoethyl-(2',3'-dideoxyinosin-5'-yl)-1,2,3,4-tetra-*O*-acetyl- $\alpha$ -D-glucopyranos-6-yl phosphate (9e)**

DEPT (MeOH- $d_4$ , 150.5 MHz)

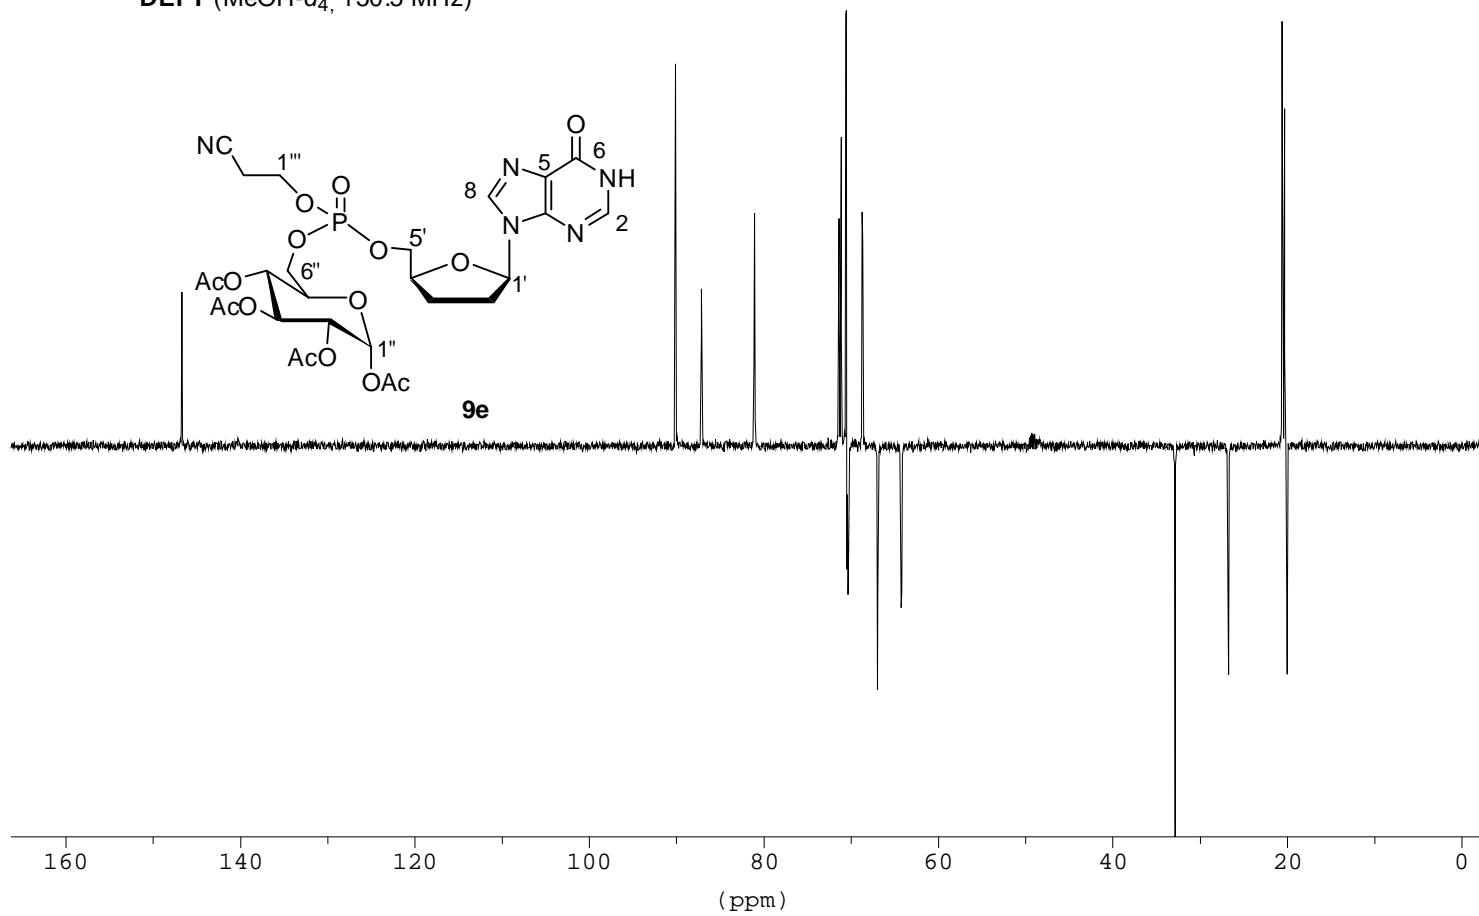

**2-Cyanoethyl-(2',3'-dideoxyinosin-5'-yl)-1,2,3,4-tetra-*O*-acetyl- $\alpha$ -D-glucopyranos-6-yl phosphate (9e)**

$^{31}\text{P}$ -RMN (MeOH- $d_4$ , 242.9 MHz)

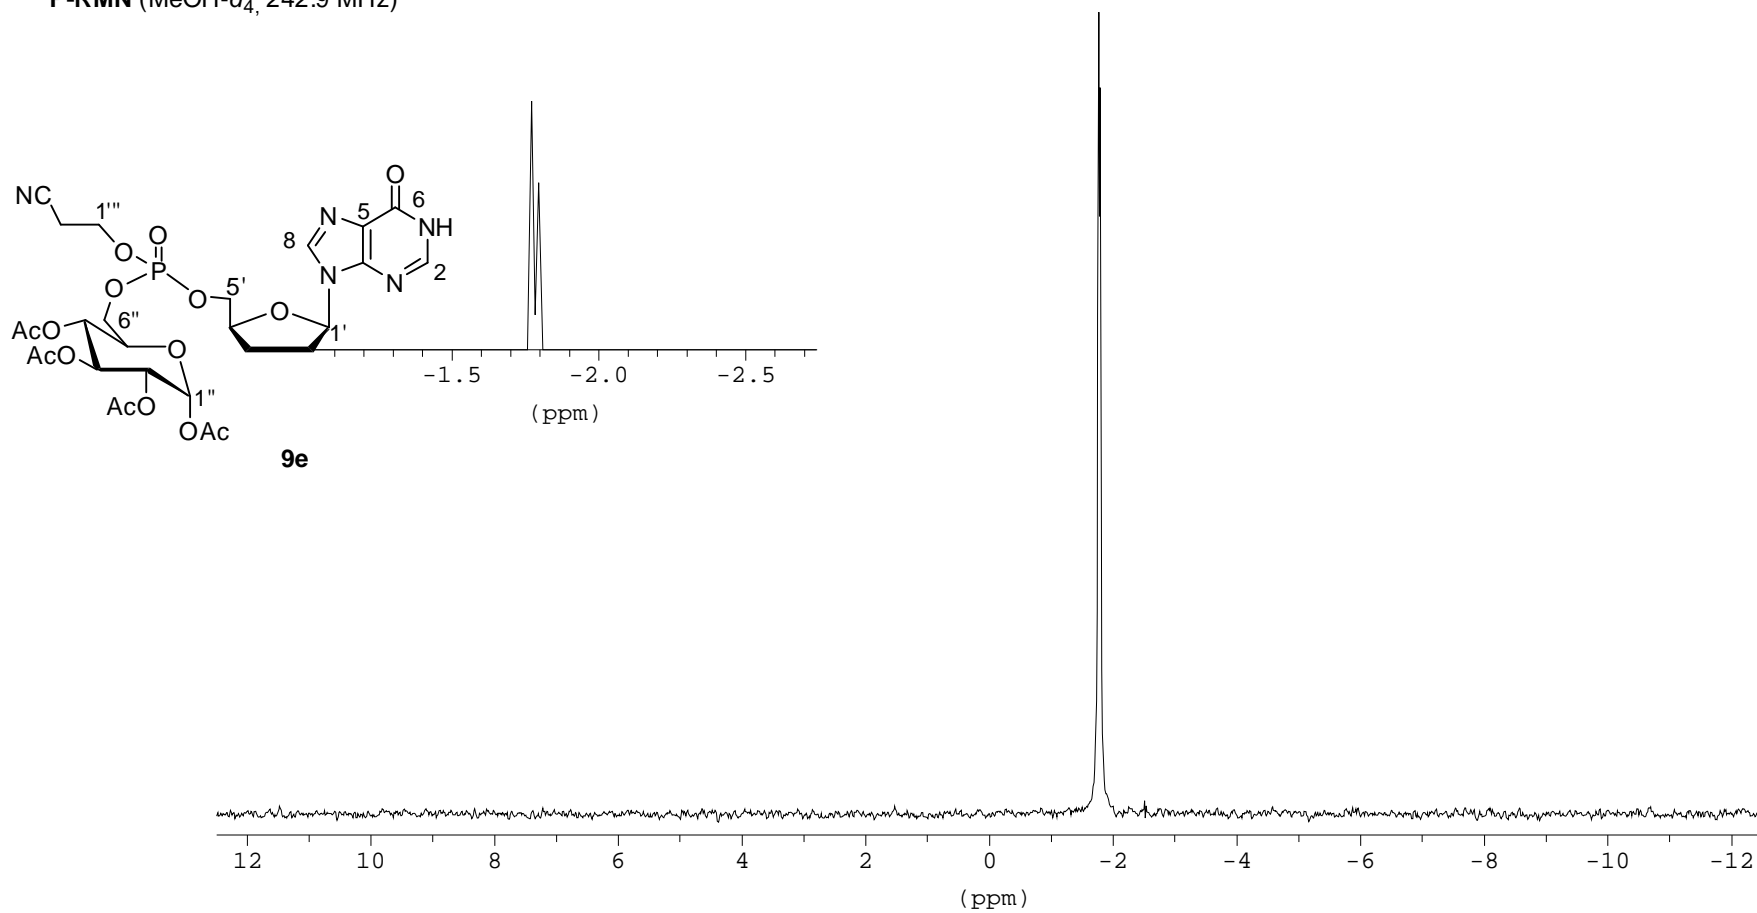

2-Cyanoethyl-(2',3'-dideoxyinosin-5'-yl)-1,2,3,4-tetra-*O*-acetyl- $\alpha$ -D-glucopyranos-6-yl phosphate (9e)

COSY (MeOH-*d*<sub>4</sub>, 600 MHz)

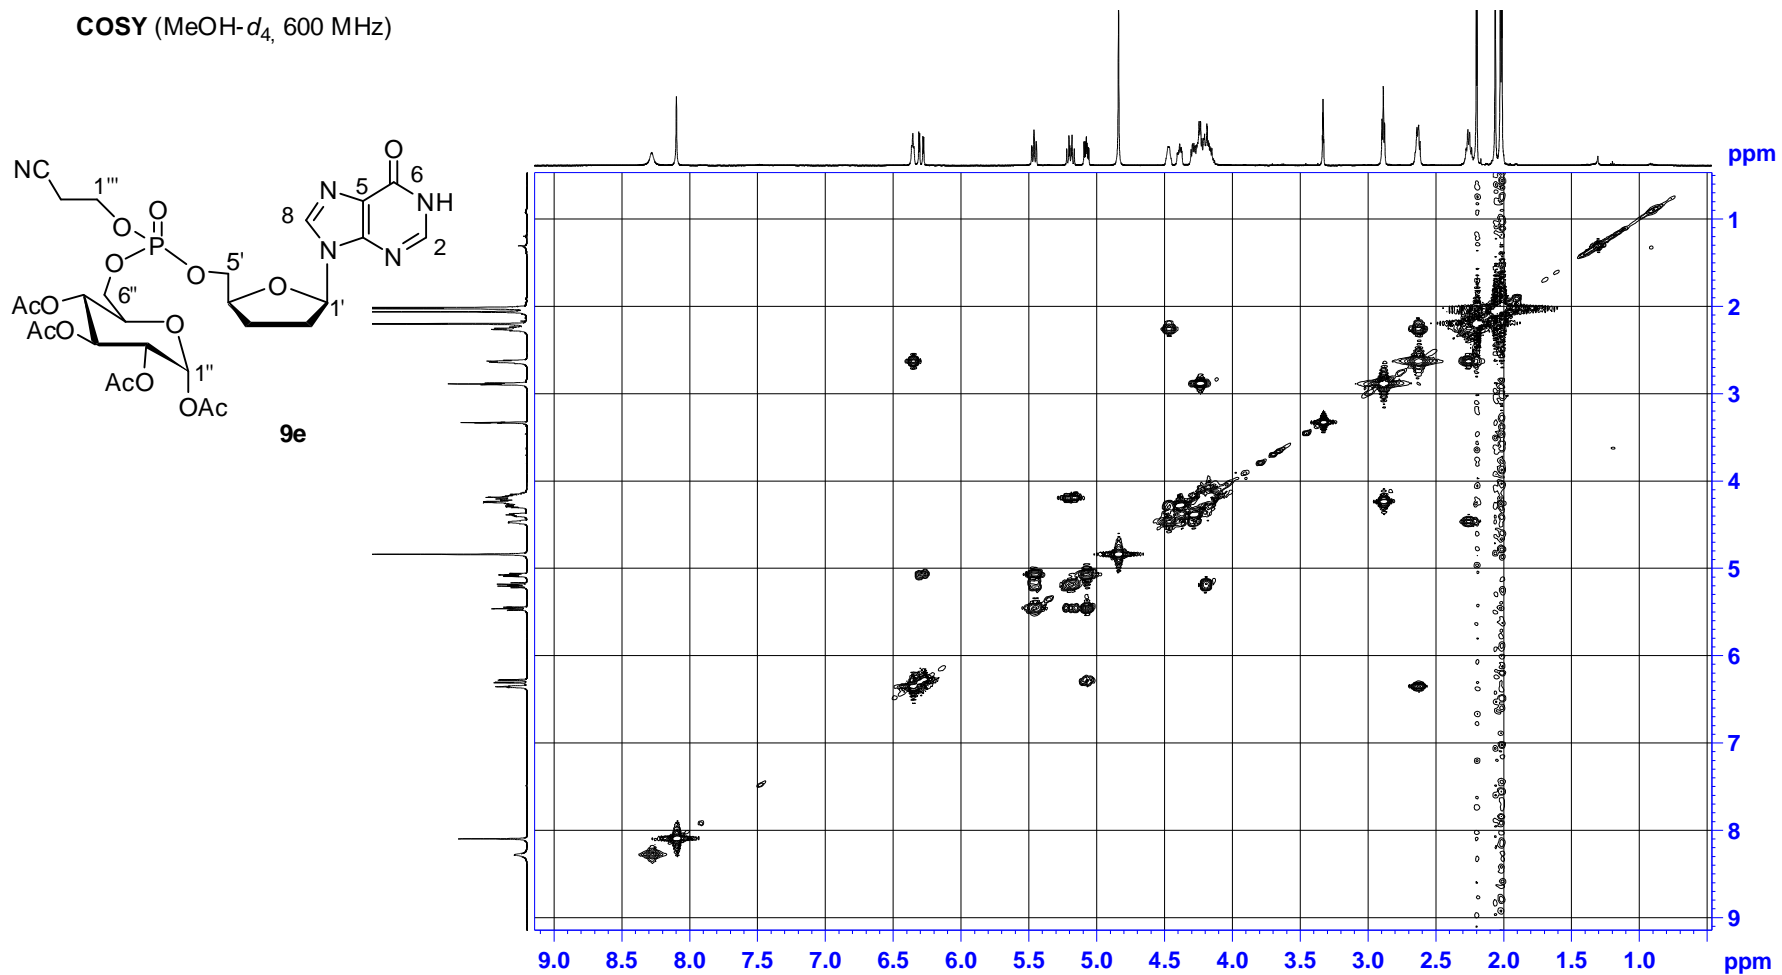

2-Cyanoethyl-(2',3'-dideoxyinosin-5'-yl)-1,2,3,4-tetra-*O*-acetyl- $\alpha$ -D-glucopyranos-6-yl phosphate (9e)

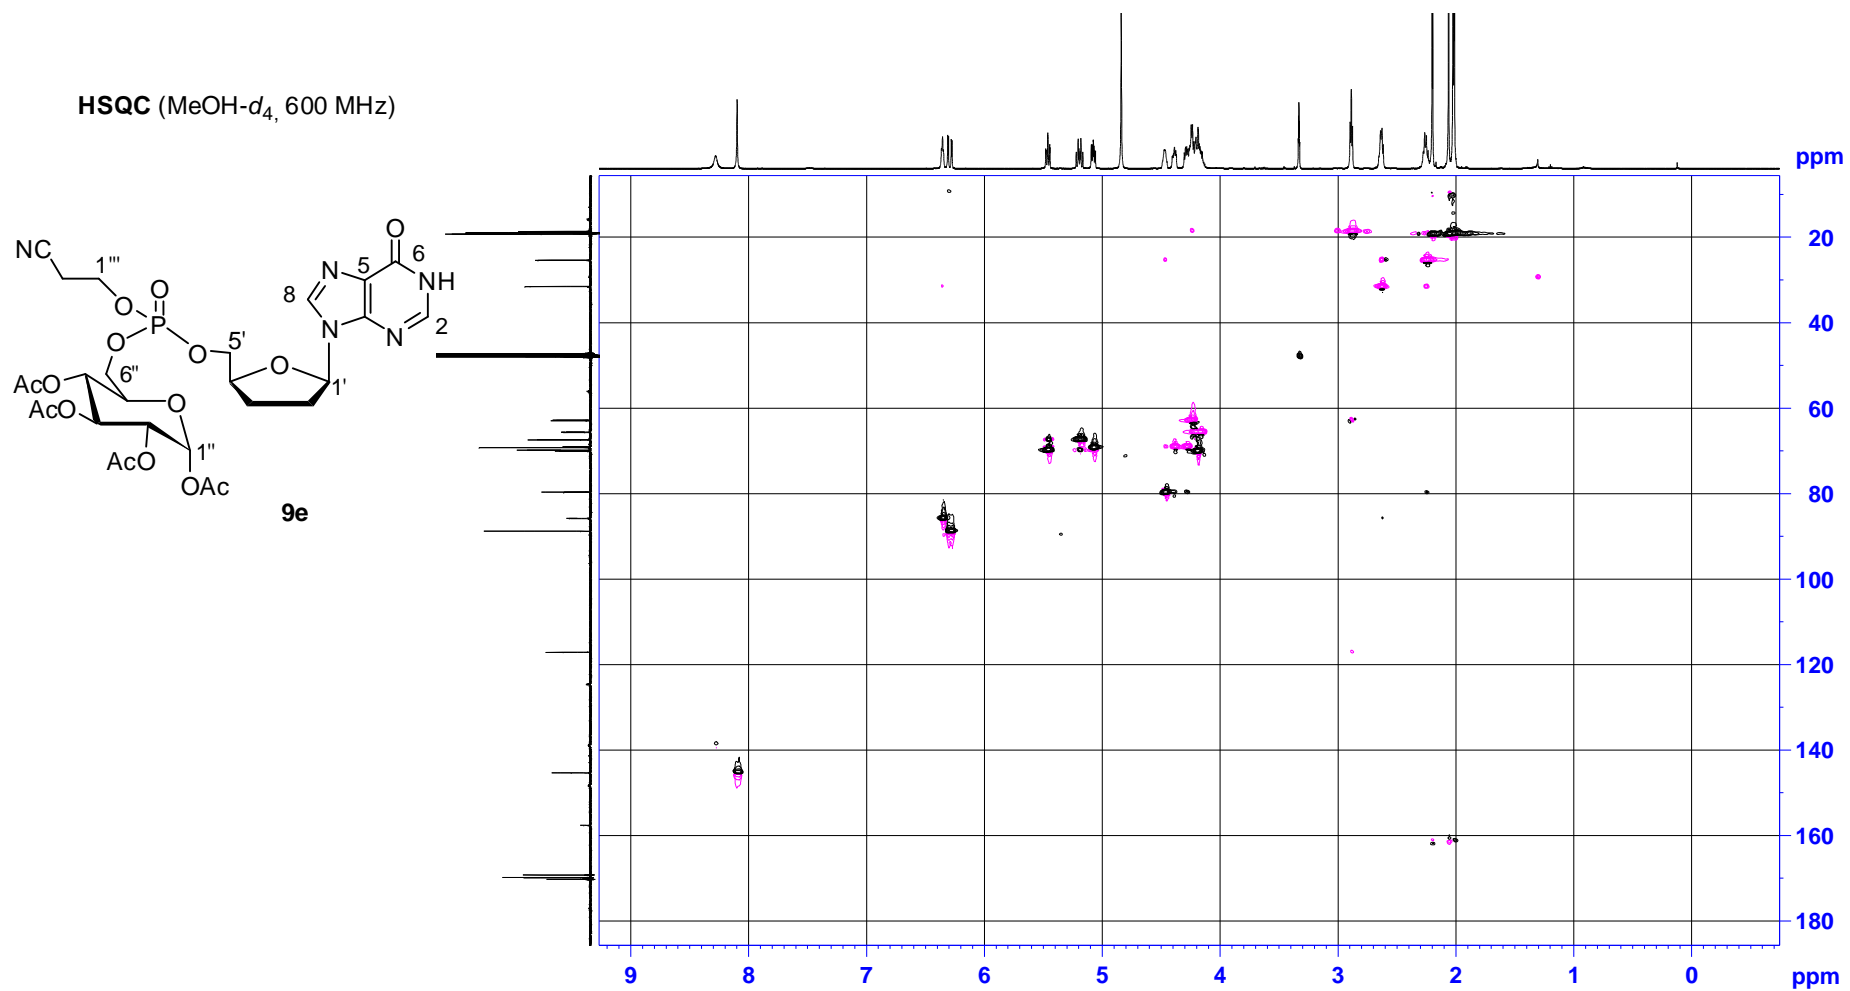

2-Cyanoethyl-(2',3'-dideoxyinosin-5'-yl)-1,2,3,4-tetra-*O*-acetyl- $\alpha$ -D-glucopyranos-6-yl phosphate (9e)

HMBC (MeOH- $d_4$ , 600 MHz)

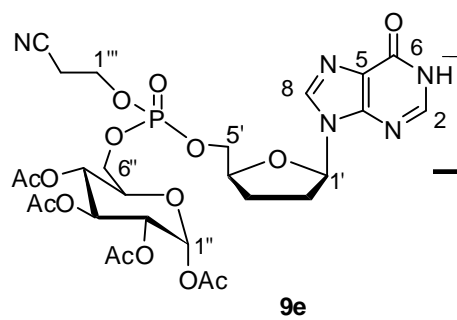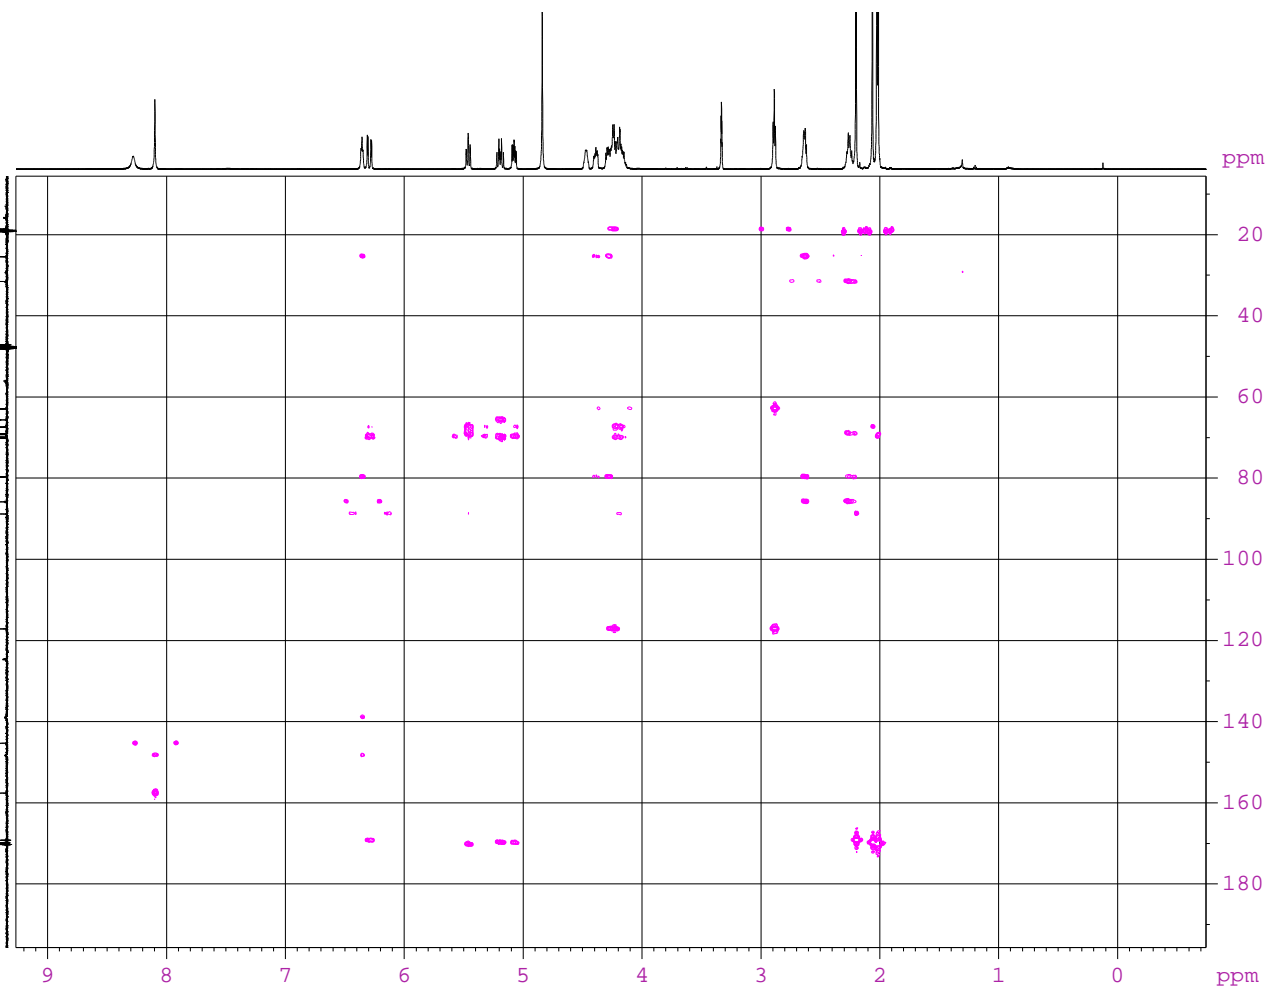

**2-Cyanoethyl-[N<sup>6</sup>-(dimethylamino)methylen-2',3'-dideoxyadenosin-5'-yl]-1,2,3,4-tetra-O-acetyl- $\alpha$ -D-glucopyranos-6-yl phosphate (9f)**

<sup>1</sup>H-RMN (MeOH-d<sub>4</sub>, 600 MHz)

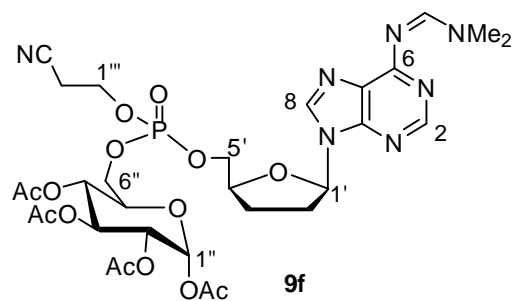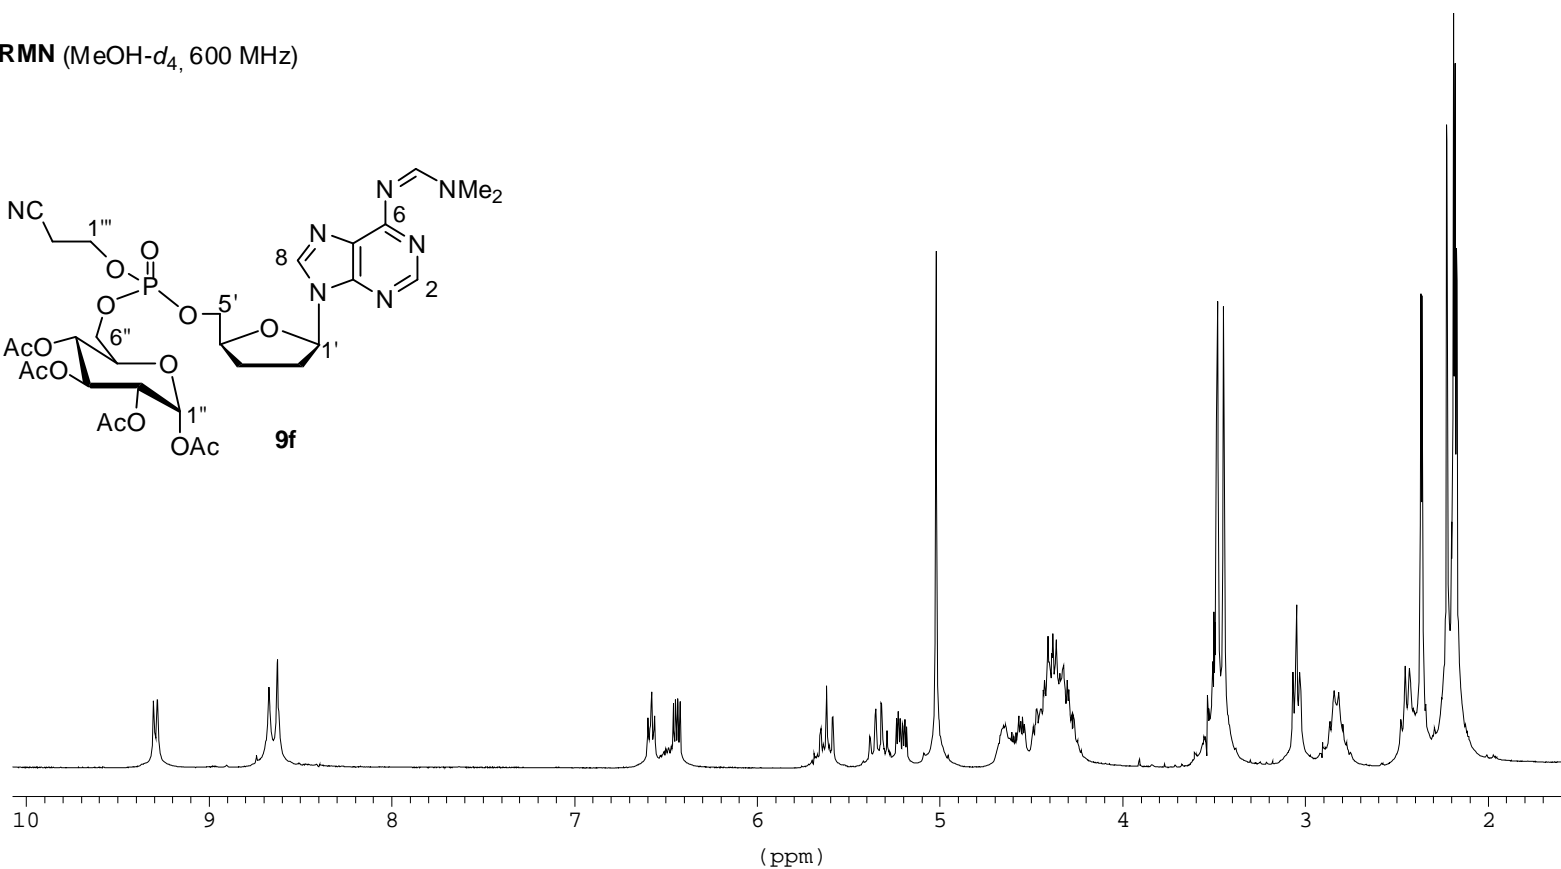

**2-Cyanoethyl-[*N*<sup>6</sup>-(dimethylamino)methylen-2',3'-dideoxyadenosin-5'-yl]-1,2,3,4-tetra-*O*-acetyl- $\alpha$ -D-glucopyranos-6-yl phosphate (9f)**

<sup>13</sup>C-RMN (MeOH-*d*<sub>4</sub>, 150.5 MHz)

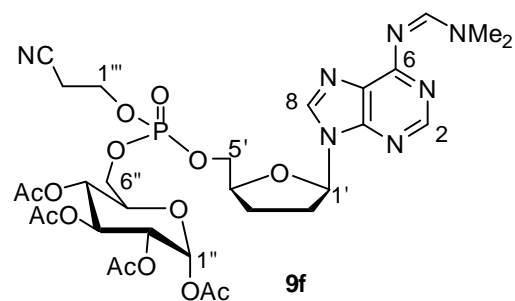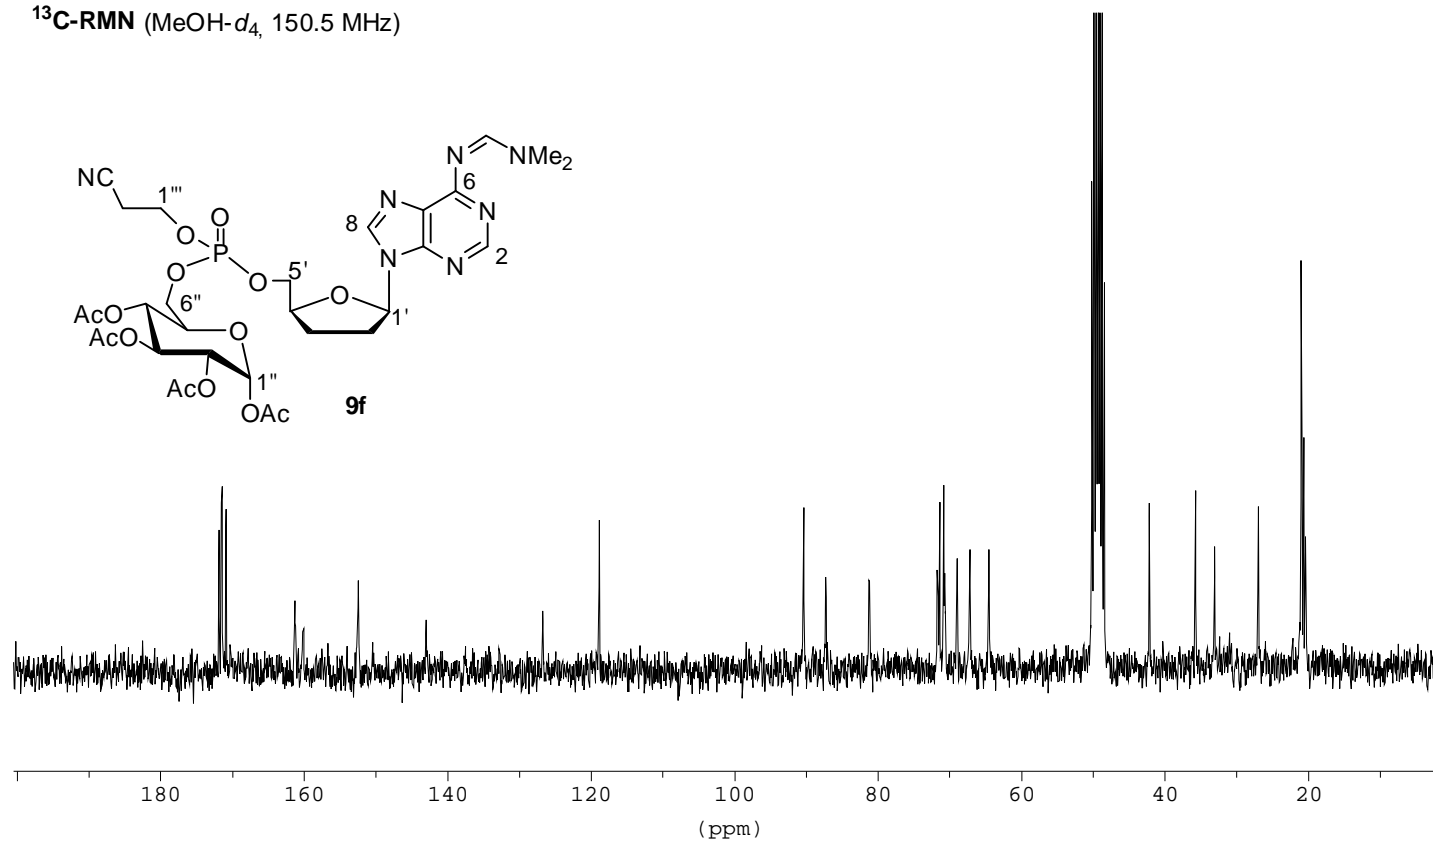



**2-Cyanoethyl-[*N*<sup>6</sup>-(dimethylamino)methylen-2',3'-dideoxyadenosin-5'-yl]-1,2,3,4-tetra-*O*-acetyl- $\alpha$ -D-glucopyranos-6-yl phosphate (**9f**)**

DEPT (MeOH-*d*<sub>4</sub>, 150.5 MHz)

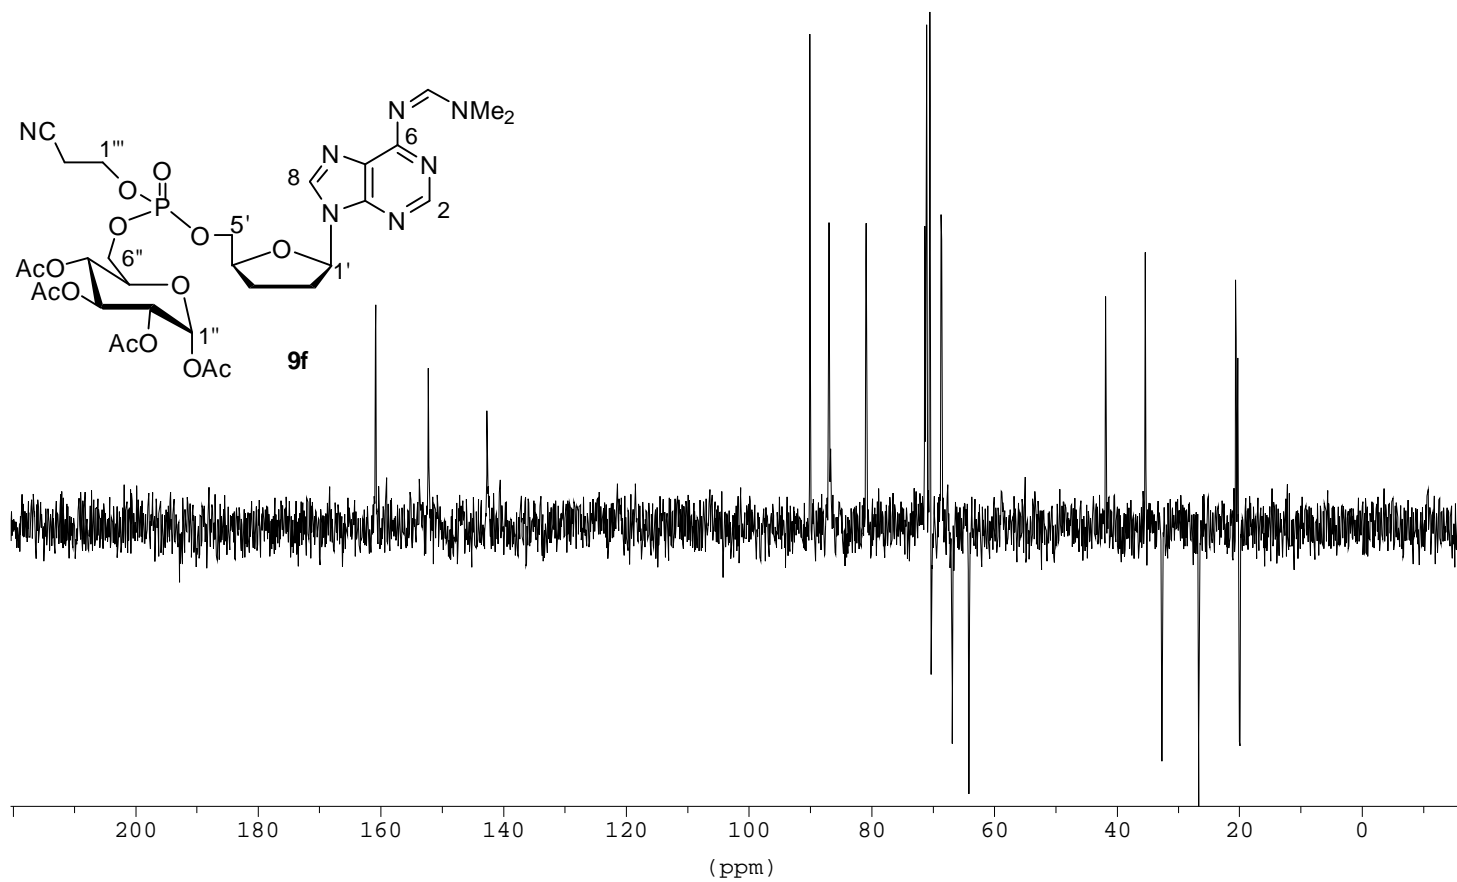

**2-Cyanoethyl-[N<sup>6</sup>-(dimethylamino)methylen-2',3'-dideoxyadenosin-5'-yl]-1,2,3,4-tetra-O-acetyl- $\alpha$ -D-glucopyranos-6-yl phosphate (9f)**

<sup>31</sup>P-RMN (MeOH-d<sub>4</sub>, 242.9 MHz)

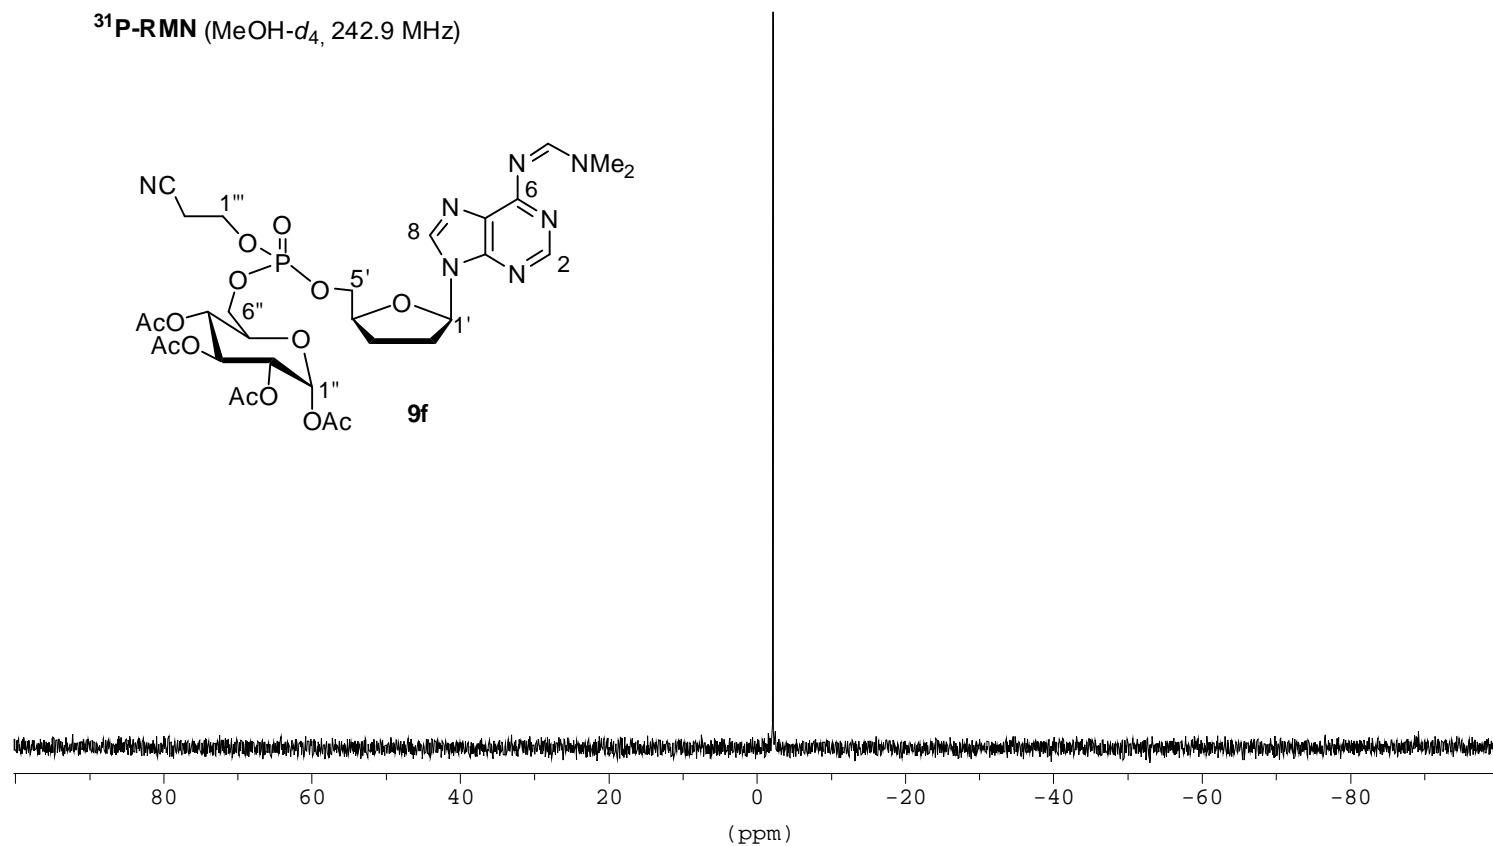

**2-Cyanoethyl-[2',3'-di-*O*-acetyl-1'-(3-carbamoyl-1,2,4-triazoyl)- $\beta$ -D-ribofuranos-5'-yl]-1,2,3,4-tetra-*O*-acetyl- $\alpha$ -D-glucopyranos-6-yl phosphate (9g)**

<sup>1</sup>H-RMN (MeOH-*d*<sub>4</sub>, 600 MHz)

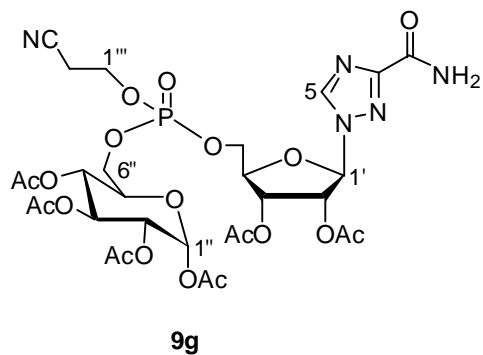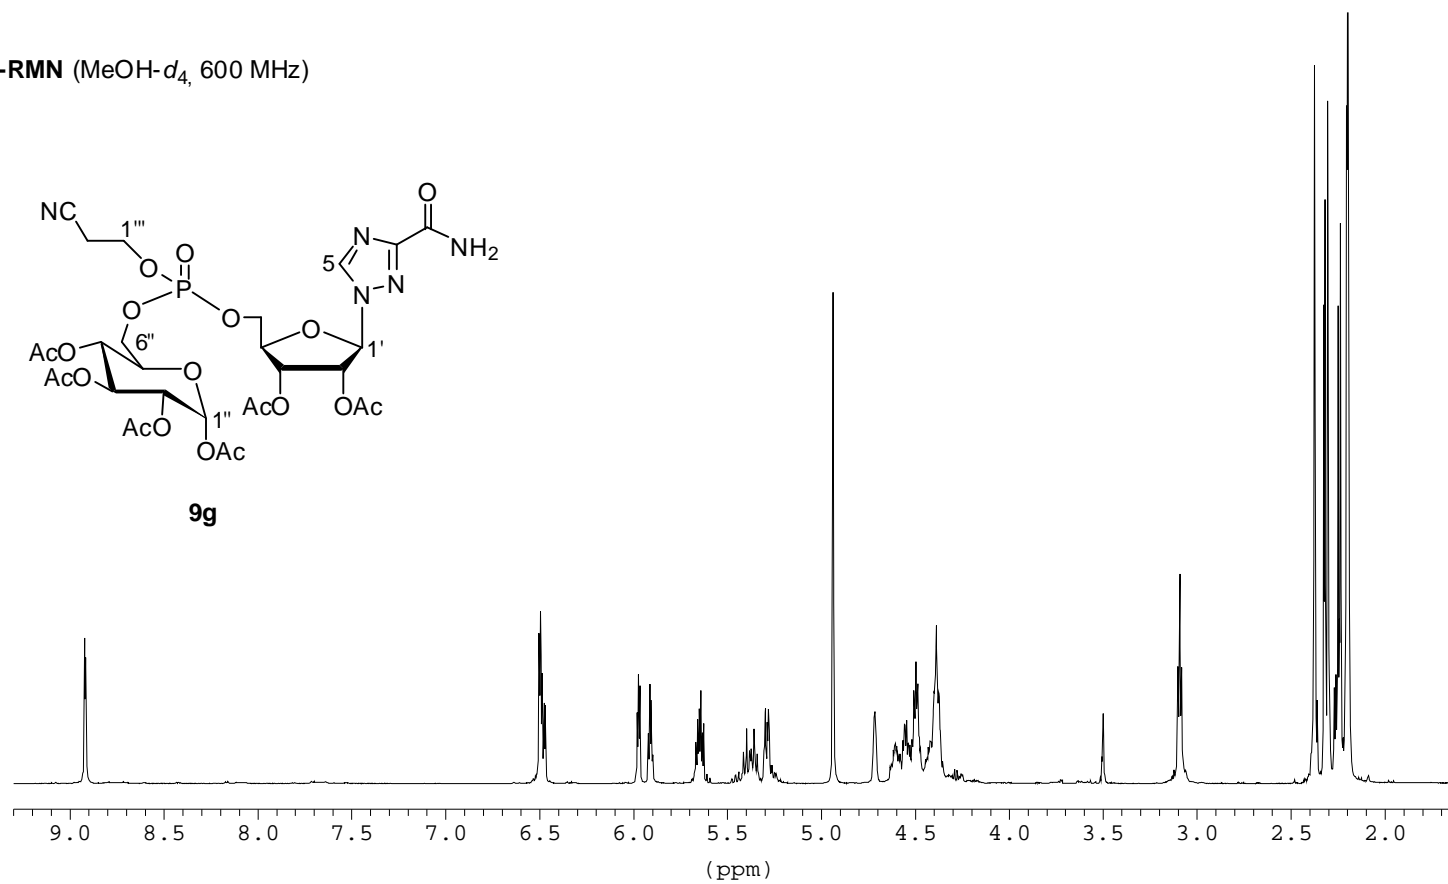

2-Cyanoethyl-[2',3'-di-*O*-acetyl-1'-(3-carbamoyl-1,2,4-triazoyl)- $\beta$ -D-ribofuranos-5'-yl]-1,2,3,4-tetra-*O*-acetyl- $\alpha$ -D-glucopyranos-6-yl phosphate (9g)

$^{13}\text{C}$ -RMN (MeOH- $d_4$ , 150.5 MHz)

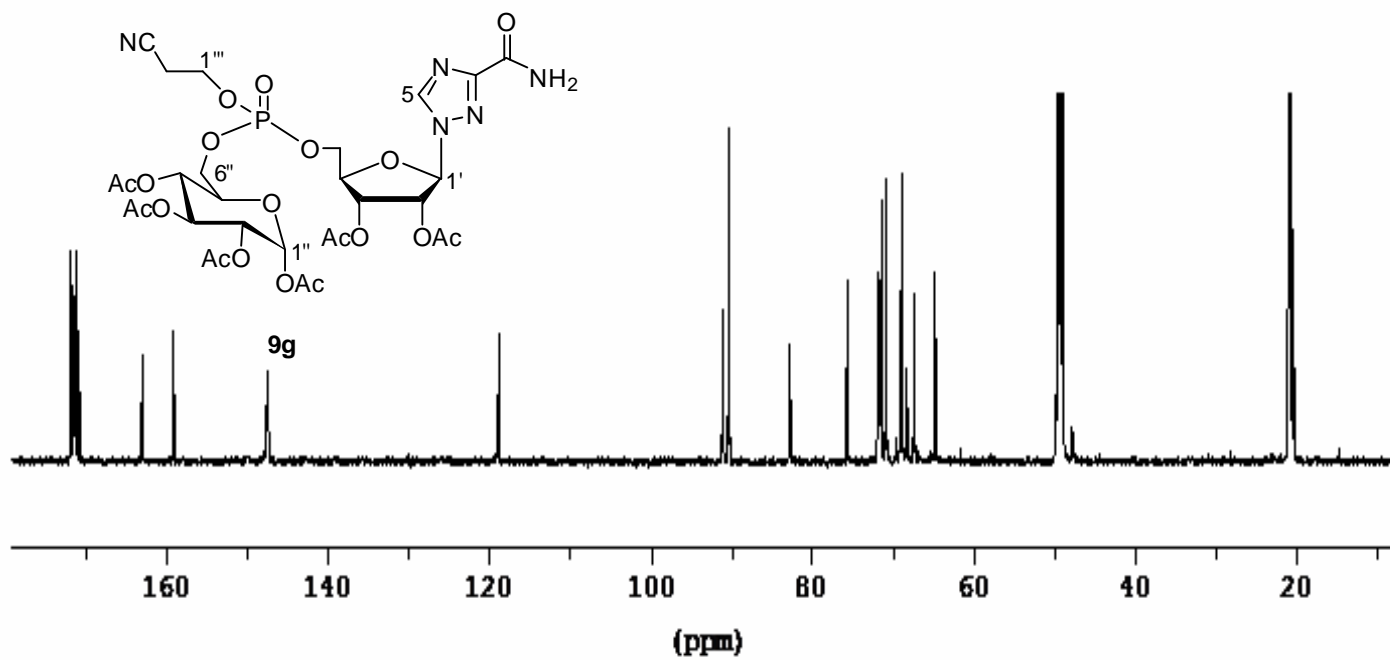

**2-Cyanoethyl-[2',3'-di-O-acetyl-1'-(3-carbamoyl-1,2,4-triazoyl)-β-D-ribofuranos-5'-yl]-1,2,3,4-tetra-O-acetyl-α-D-glucopyranos-6-yl phosphate (9g)**

DEPT (MeOH-*d*<sub>4</sub>, 150.5 MHz)

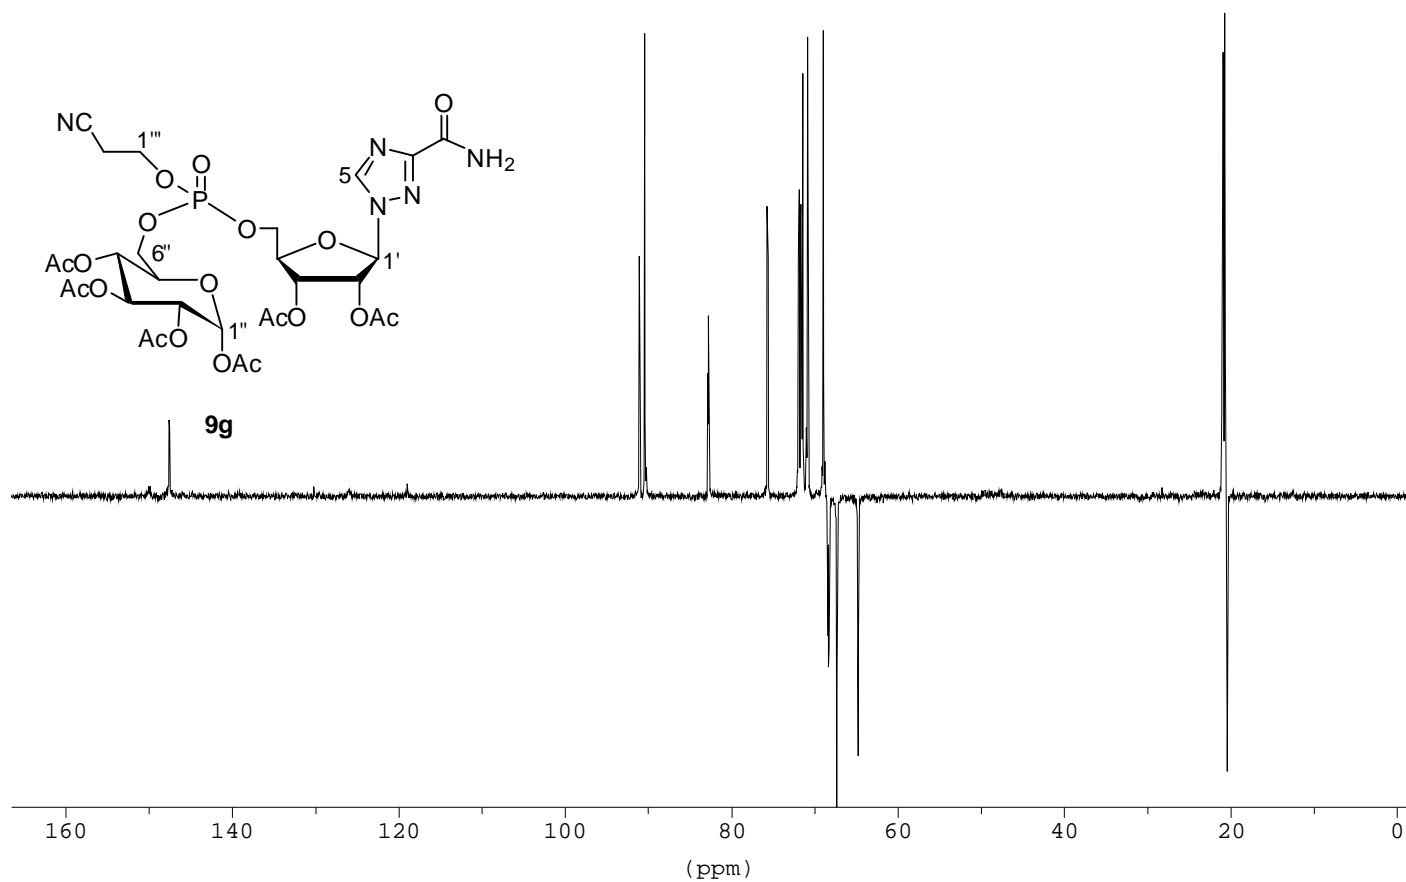

**2-Cyanoethyl-[2',3'-di-*O*-acetyl-1'-(3-carbamoyl-1,2,4-triazoyl)- $\beta$ -D-ribofuranos-5'-yl]-1,2,3,4-tetra-*O*-acetyl- $\alpha$ -D-glucopyranos-6-yl phosphate (9g)**

$^{31}\text{P}$ -RMN (MeOH- $d_4$ , 242.9 MHz)

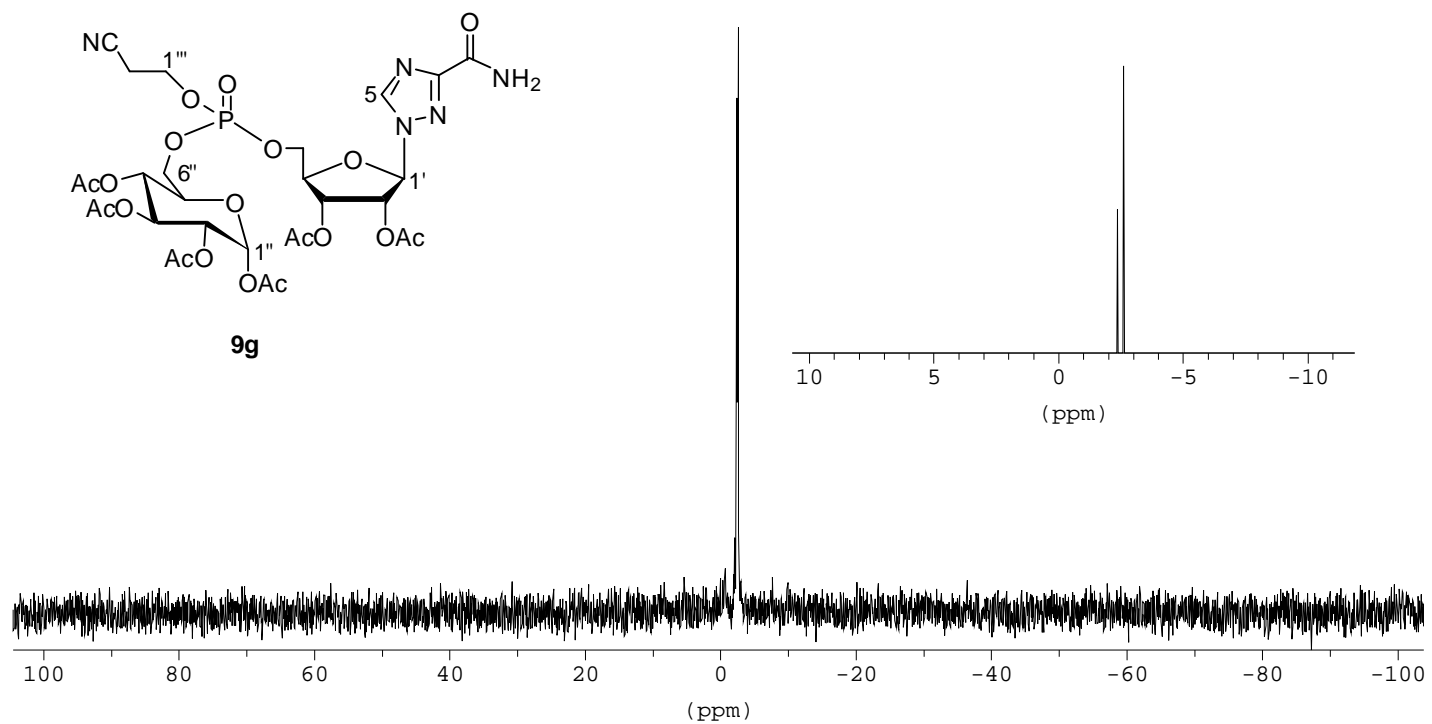

2-Cyanoethyl-[2',3'-di-*O*-acetyl-1'-(3-carbamoyl-1,2,4-triazoyl)- $\beta$ -D-ribofuranos-5'-yl]-1,2,3,4-tetra-*O*-acetyl- $\alpha$ -D-glucopyranos-6-yl phosphate (9g)

COSY (MeOH-*d*<sub>4</sub>, 600 MHz)

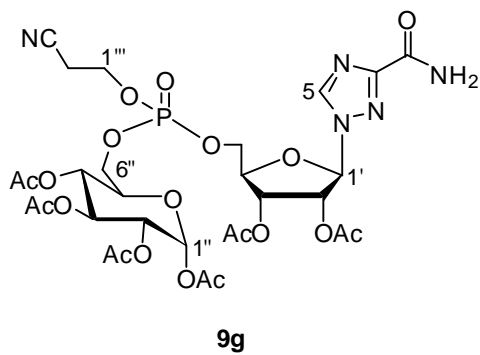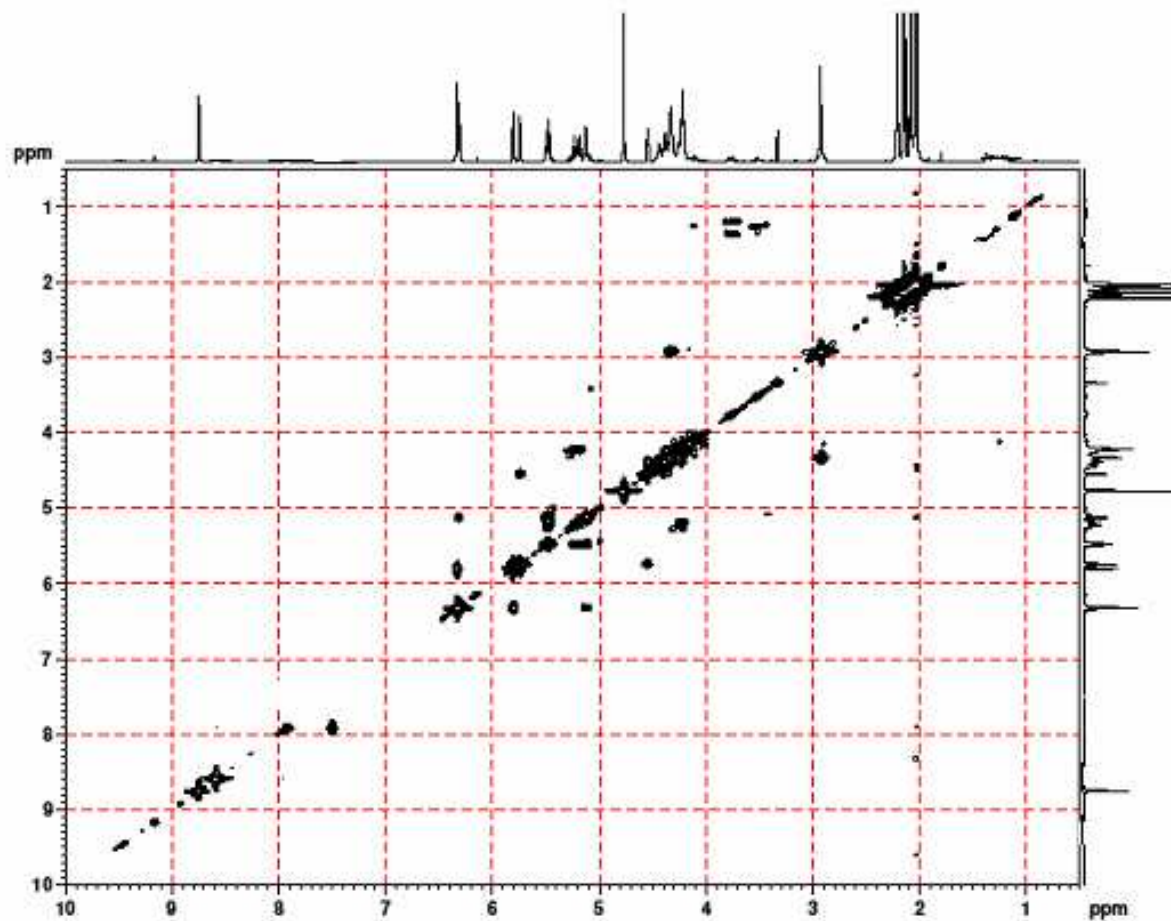

2-Cyanoethyl-[2',3'-di-*O*-acetyl-1'-(3-carbamoyl-1,2,4-triazoyl)- $\beta$ -D-ribofuranos-5'-yl]-1,2,3,4-tetra-*O*-acetyl- $\alpha$ -D-glucopyranos-6-yl phosphate (9g)

HSQC (MeOH-*d*<sub>4</sub>, 600 MHz)

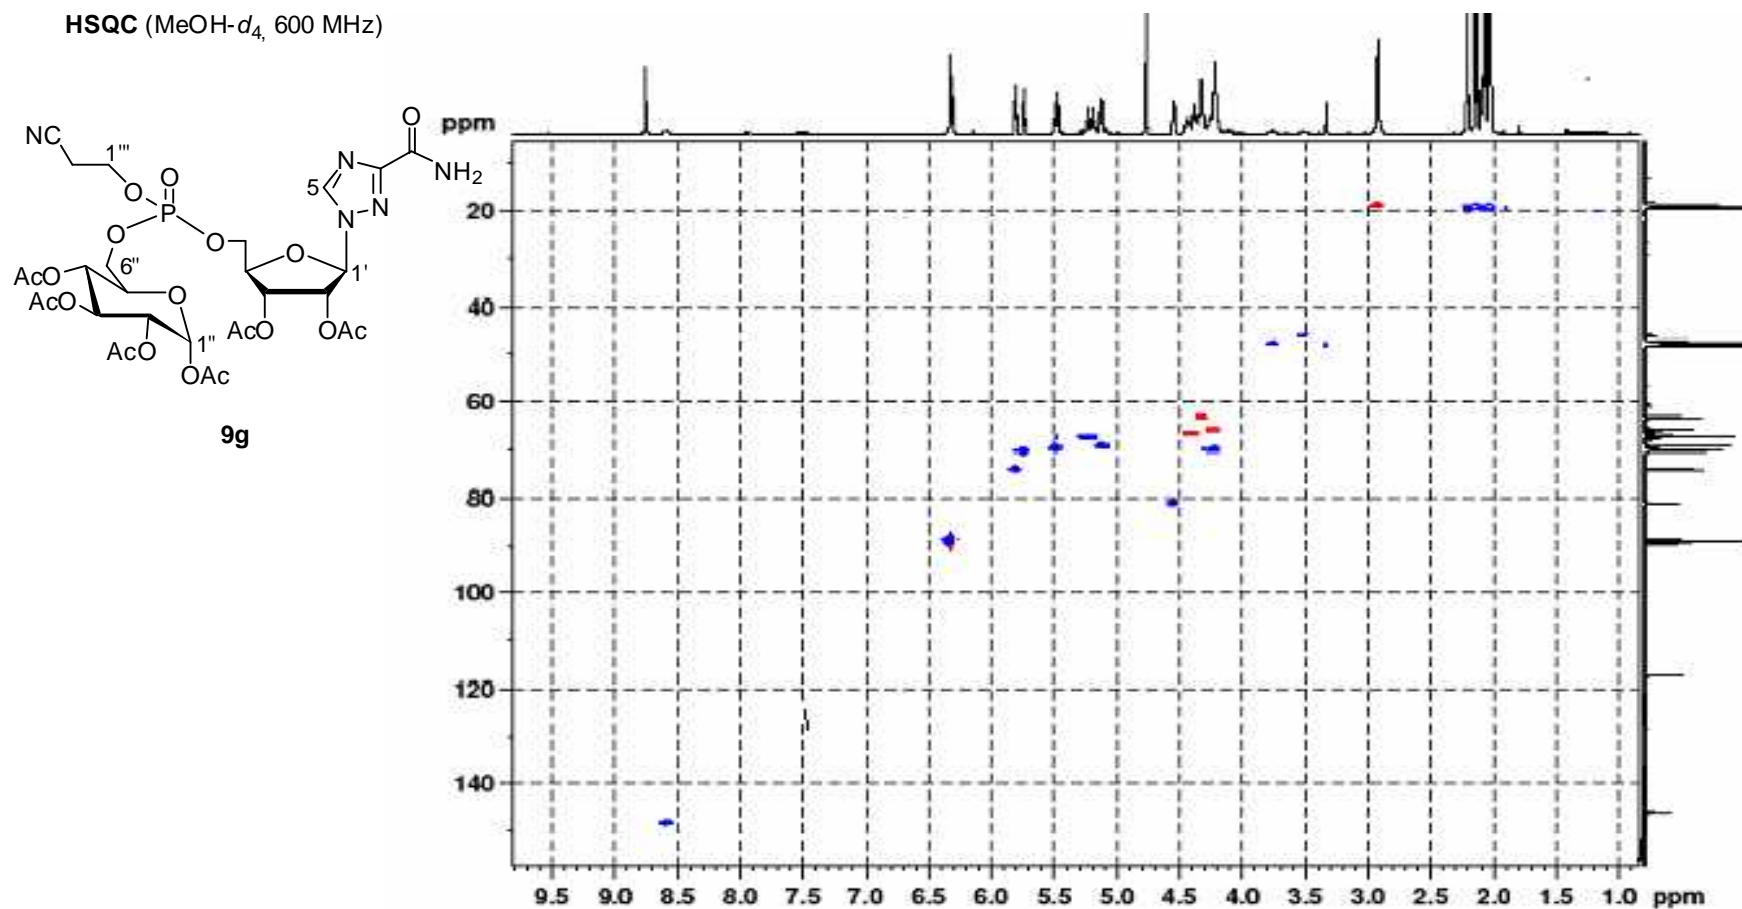



2-Cyanoethyl-[2',3'-di-*O*-acetyl-1'-(3-carbamoyl-1,2,4-triazoyl)- $\beta$ -D-ribofuranos-5'-yl]-1,2,3,4-tetra-*O*-acetyl- $\alpha$ -D-glucopyranos-6-yl phosphate (9g)  
HMBC (MeOH- $d_4$ , 600 MHz)

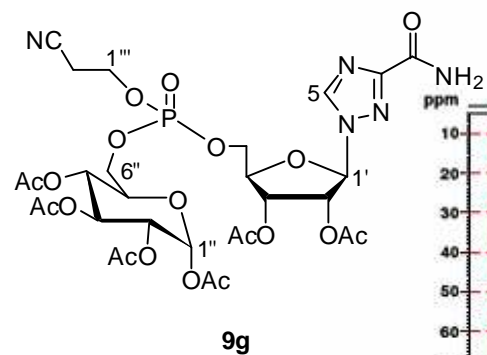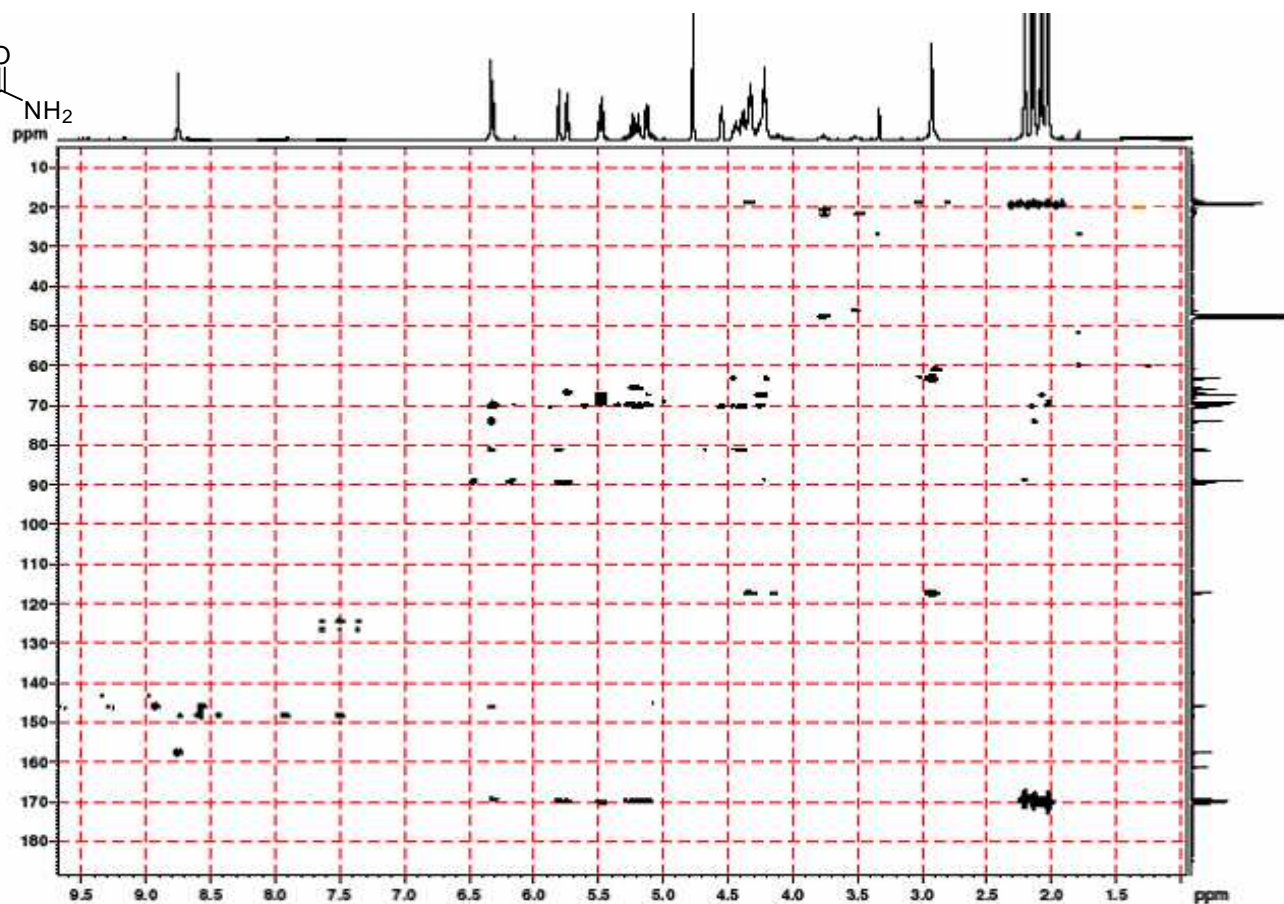

**2-Cyanoethyl-[2',3'-di-O-acetyl-1'-(N<sup>6</sup>-benzoyladeninyl)-β-D-arabinofuranos-5'-yl]-1,2,3,4-tetra-O-acetyl-α-D-glucopyranos-6-yl phosphate (9h)**

<sup>1</sup>H-RMN (CD<sub>3</sub>CN, 600 MHz)

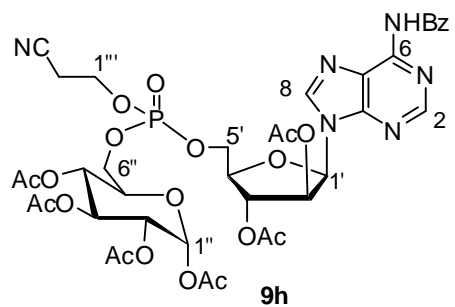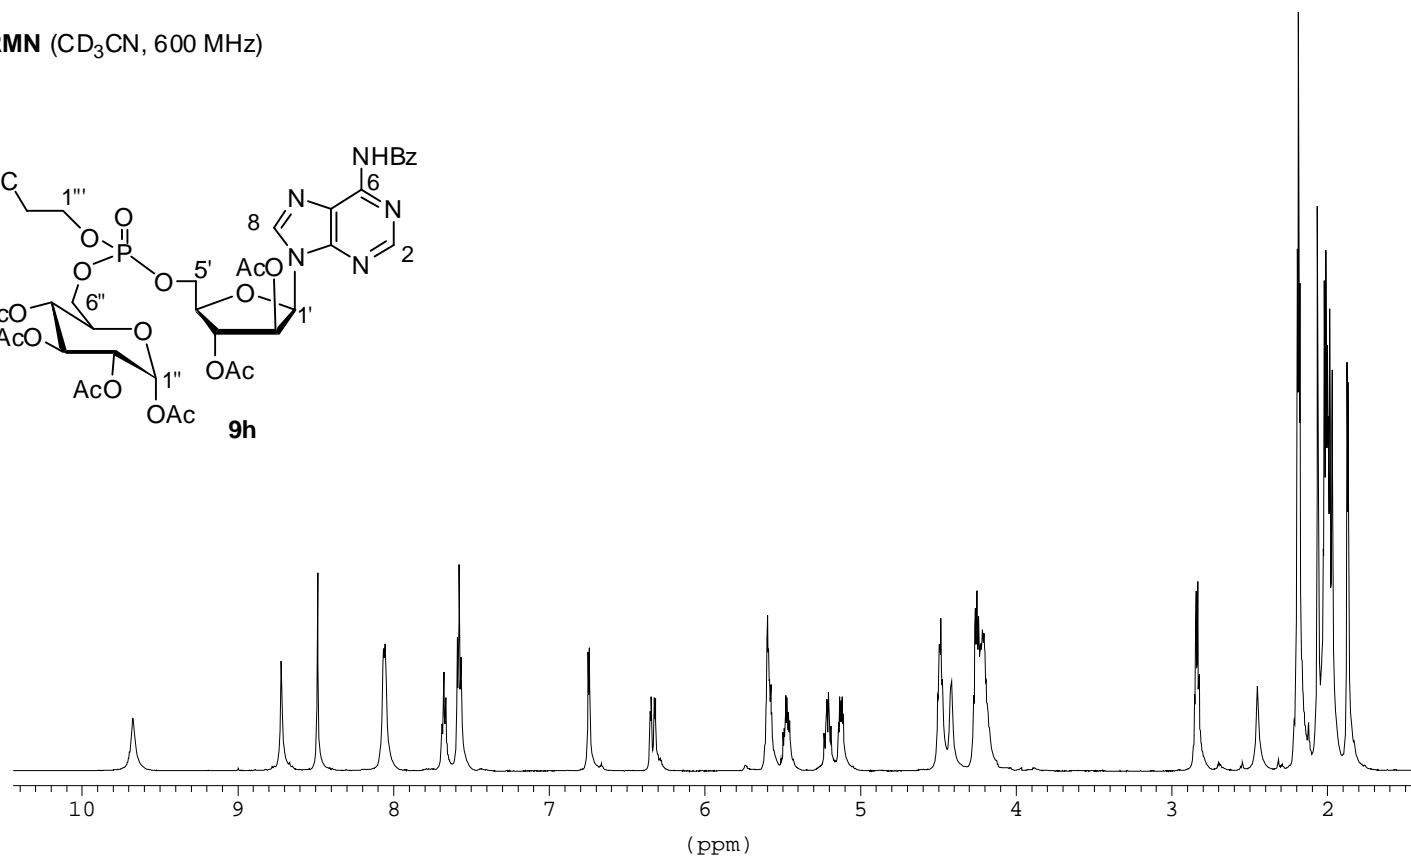

**2-Cyanoethyl-[2',3'-di-O-acetyl-1'-(N<sup>6</sup>-benzoyladeninyl)-β-D-arabinofuranos-5'-yl]-1,2,3,4-tetra-O-acetyl-α-D-glucopyranos-6-yl phosphate (9h)**

<sup>13</sup>C-RMN (CD<sub>3</sub>CN, 150.5 MHz)

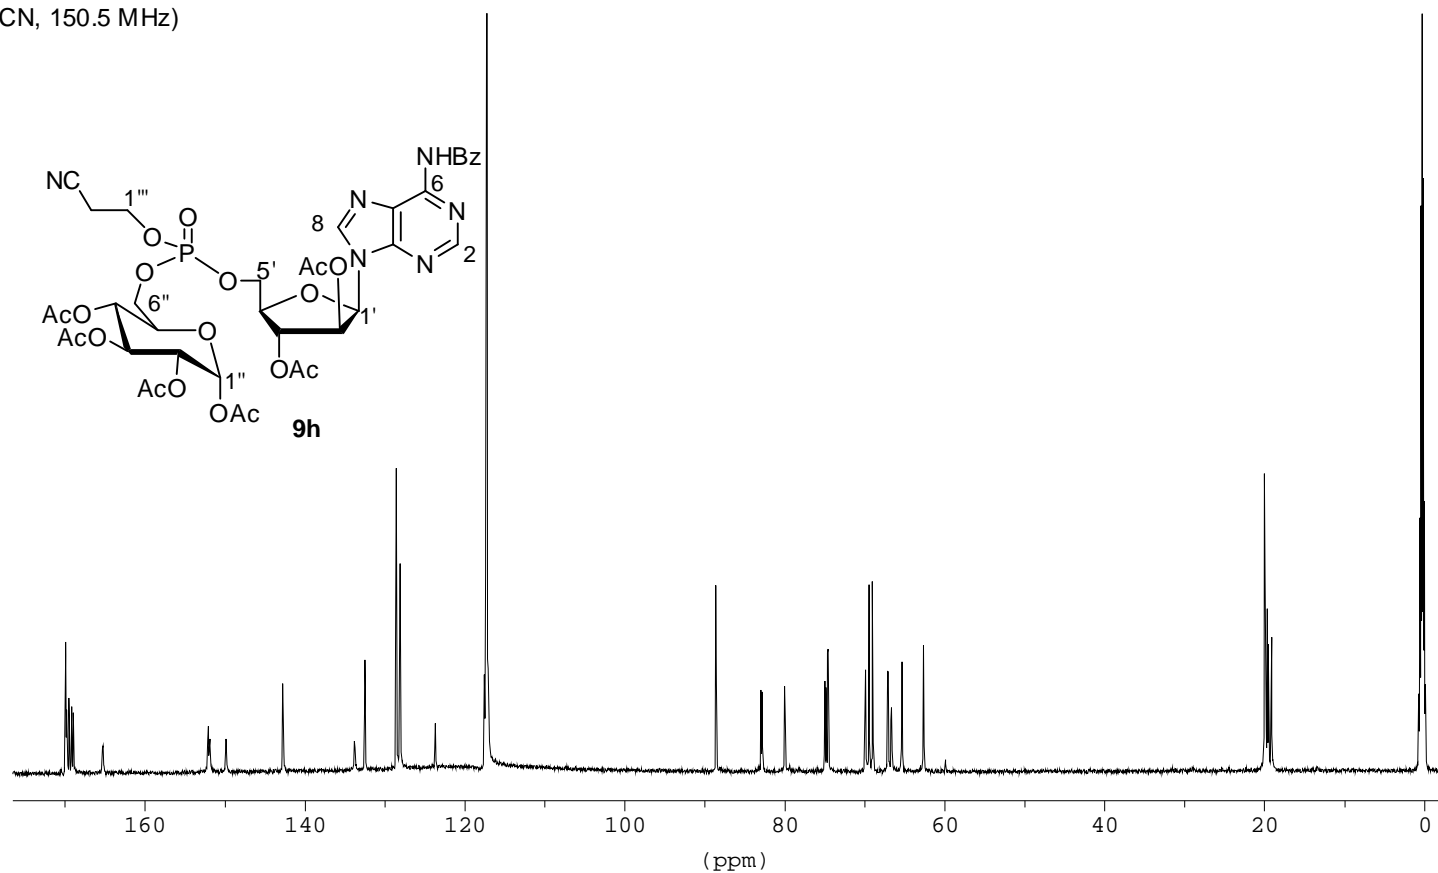

**2-Cyanoethyl-[2',3'-di-*O*-acetyl-1'-(*N*<sup>6</sup>-benzoyladeninyl)- $\beta$ -D-arabinofuranos-5'-yl]-1,2,3,4-tetra-*O*-acetyl- $\alpha$ -D-glucopyranos-6-yl phosphate (9h)**  
DEPT (CD<sub>3</sub>CN, 150.5 MHz)

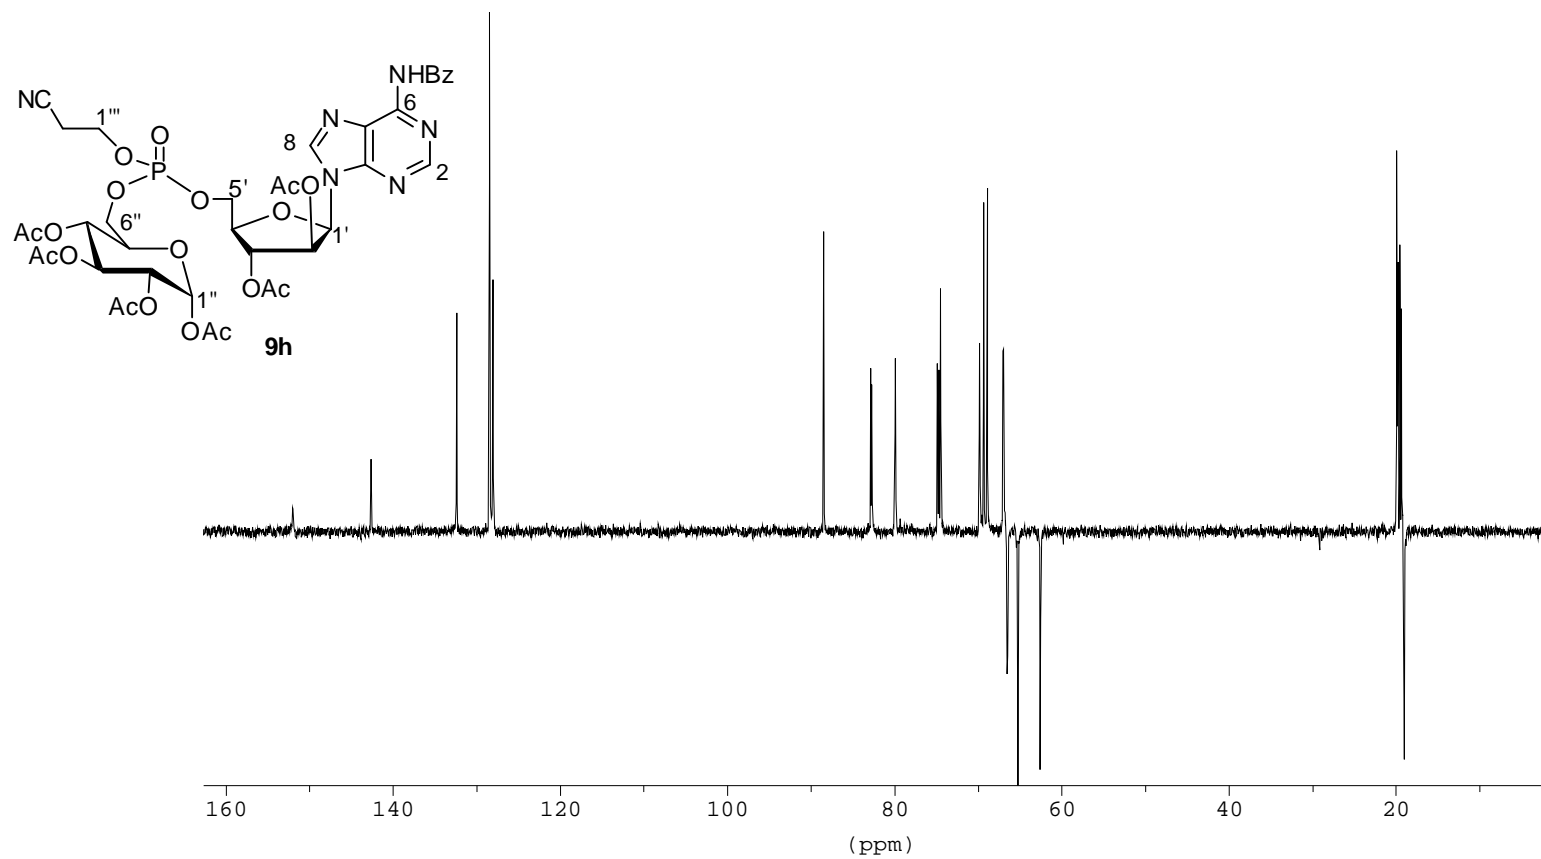

**2-Cyanoethyl-[2',3'-di-O-acetyl-1'-(N<sup>6</sup>-benzoyladeninyl)-β-D-arabinofuranos-5'-yl]-1,2,3,4-tetra-O-acetyl-α-D-glucopyranos-6-yl phosphate (9h)**

<sup>31</sup>P-RMN (CD<sub>3</sub>CN, 242.9 MHz)

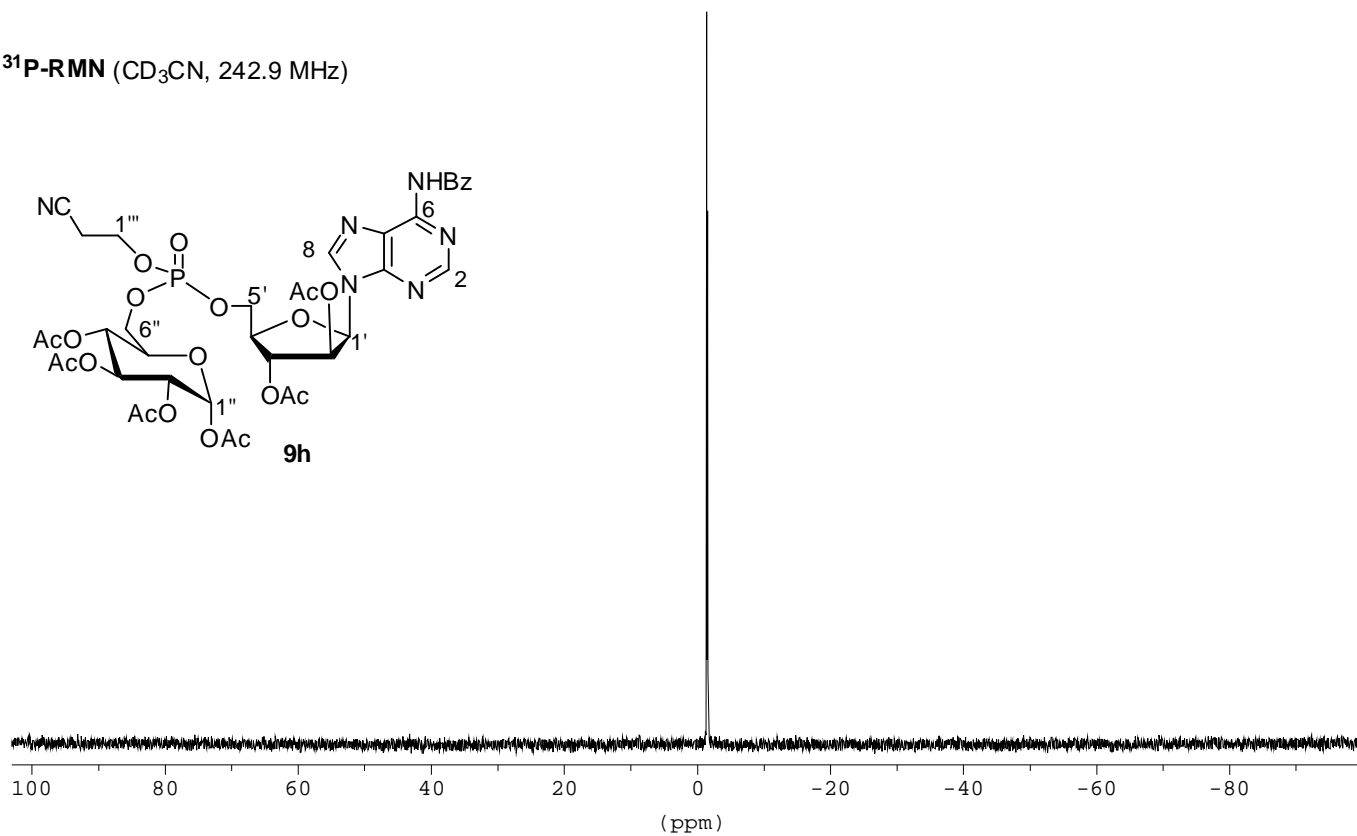

2-Cyanoethyl-[2',3'-di-*O*-acetyl-1'-(*N*<sup>6</sup>-benzoyladeninyl)- $\beta$ -D-arabinofuranos-5'-yl]-1,2,3,4-tetra-*O*-acetyl- $\alpha$ -D-glucopyranos-6-yl phosphate (9h)

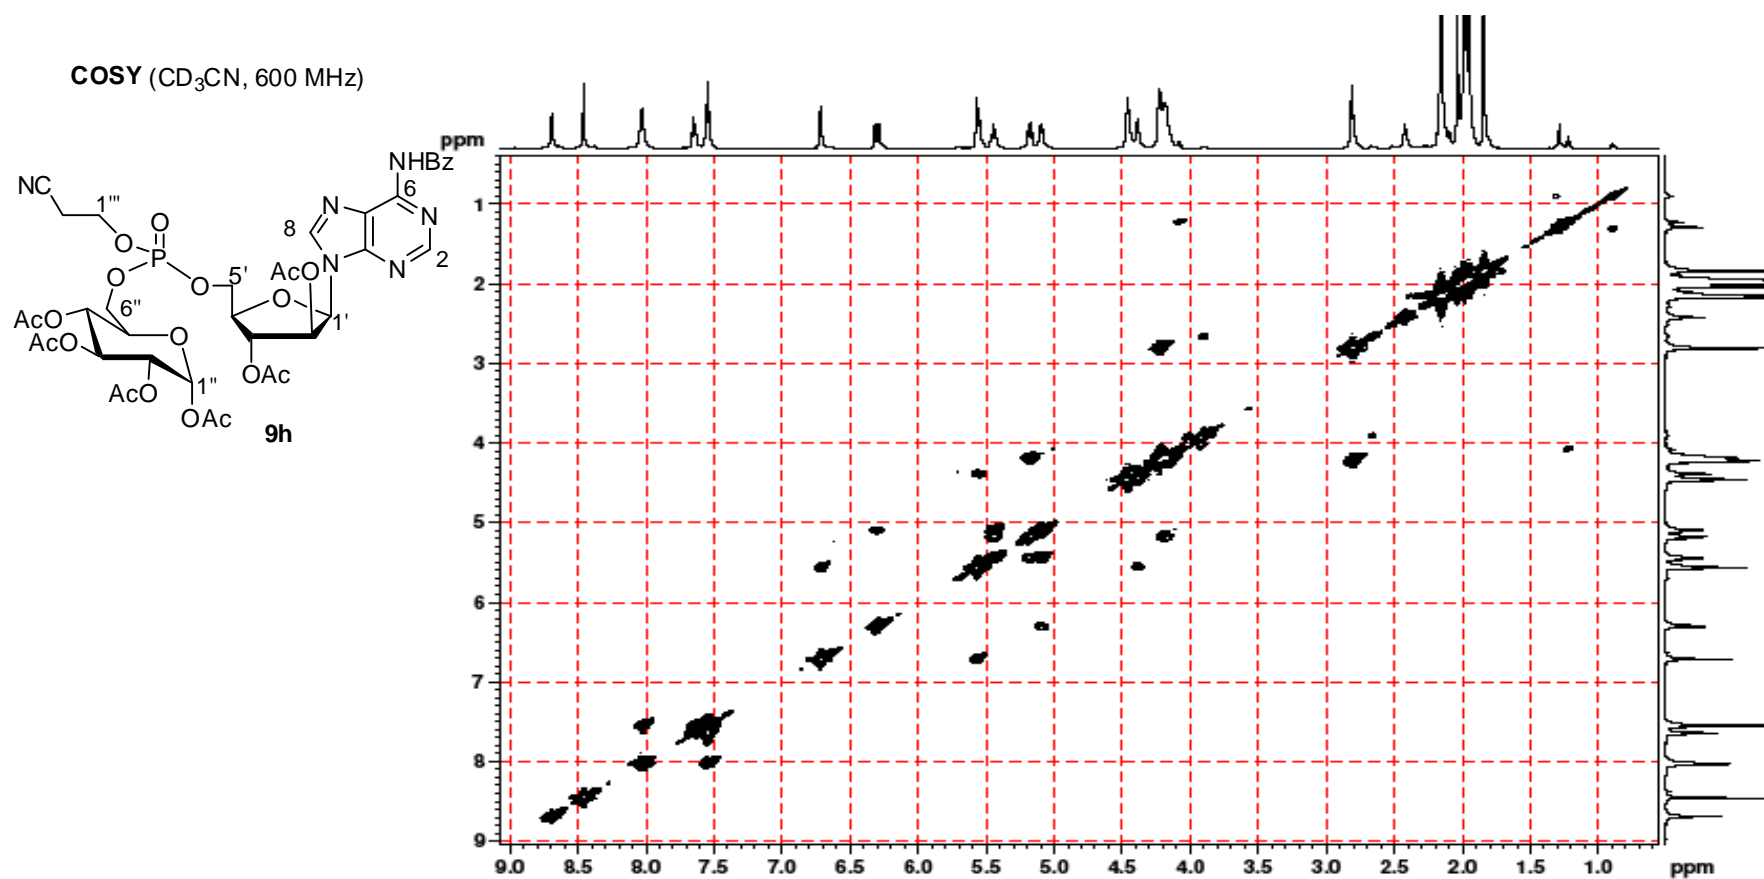

2-Cyanoethyl-[2',3'-di-O-acetyl-1'-(N<sup>6</sup>-benzoyladeninyl)-β-D-arabinofuranos-5'-yl]-1,2,3,4-tetra-O-acetyl-α-D-glucopyranos-6-yl phosphate (9h)

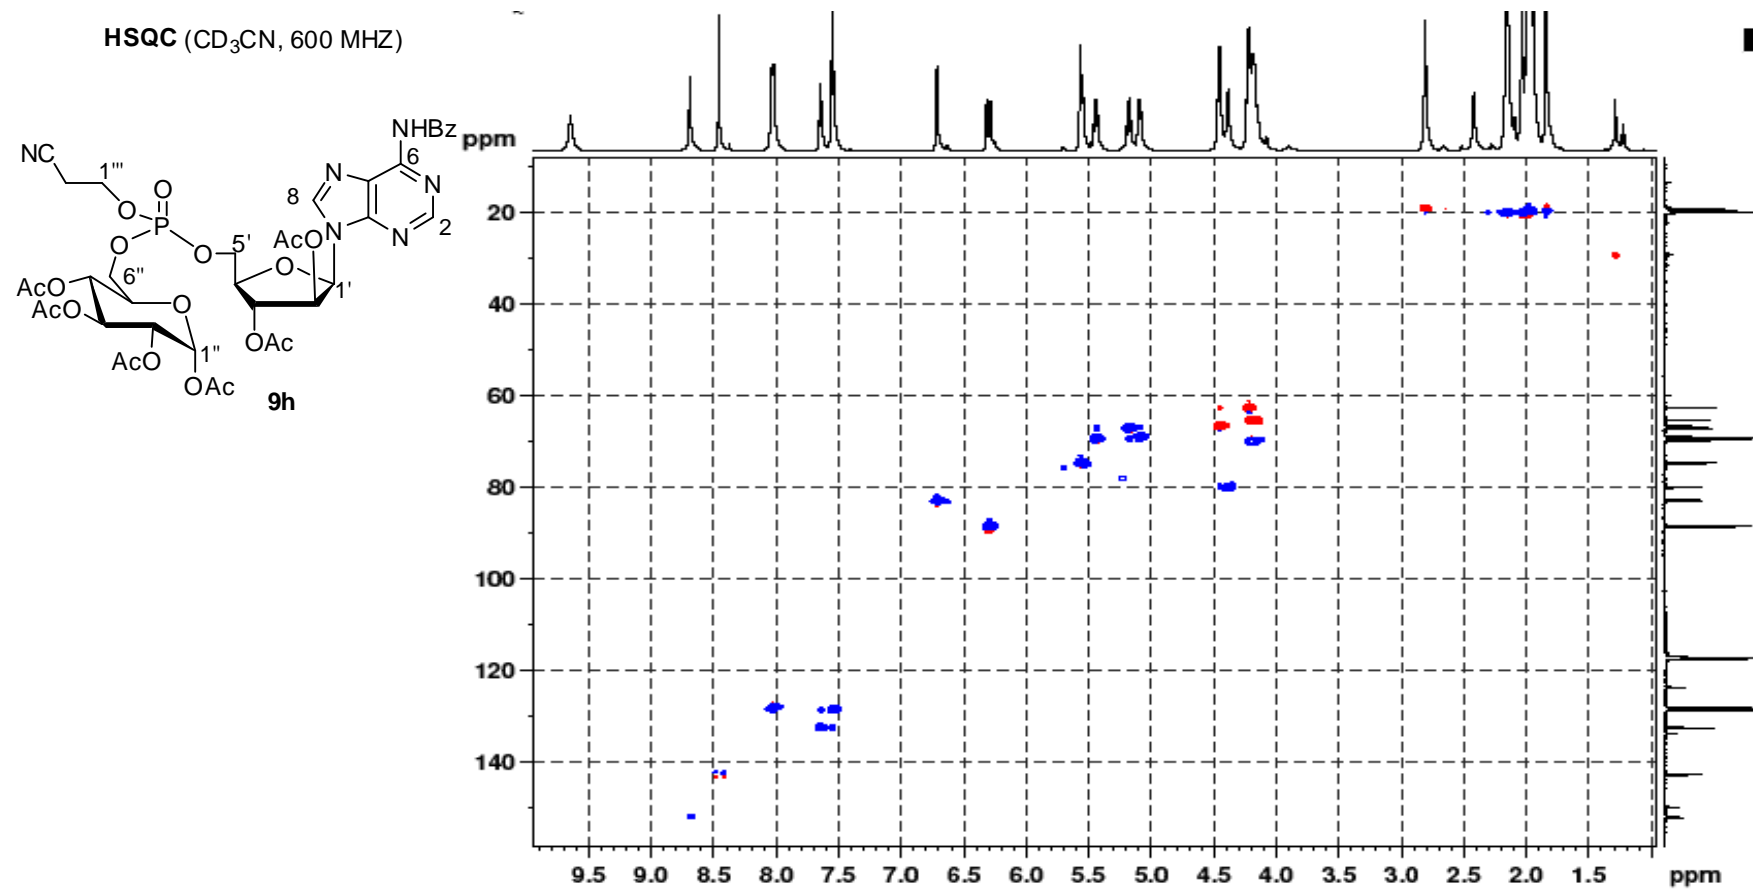

2-Cyanoethyl-[2',3'-di-*O*-acetyl-1'-(*N*<sup>6</sup>-benzoyladeninyl)- $\beta$ -D-arabinofuranos-5'-yl]-1,2,3,4-tetra-*O*-acetyl- $\alpha$ -D-glucopyranos-6-yl phosphate (9h)

HMBC (CD<sub>3</sub>CN, 600 MHz)

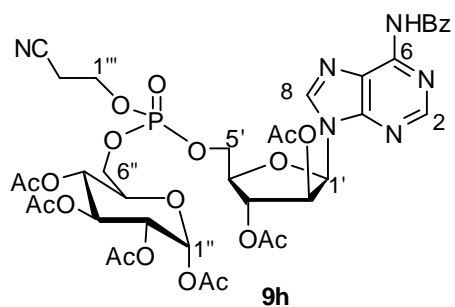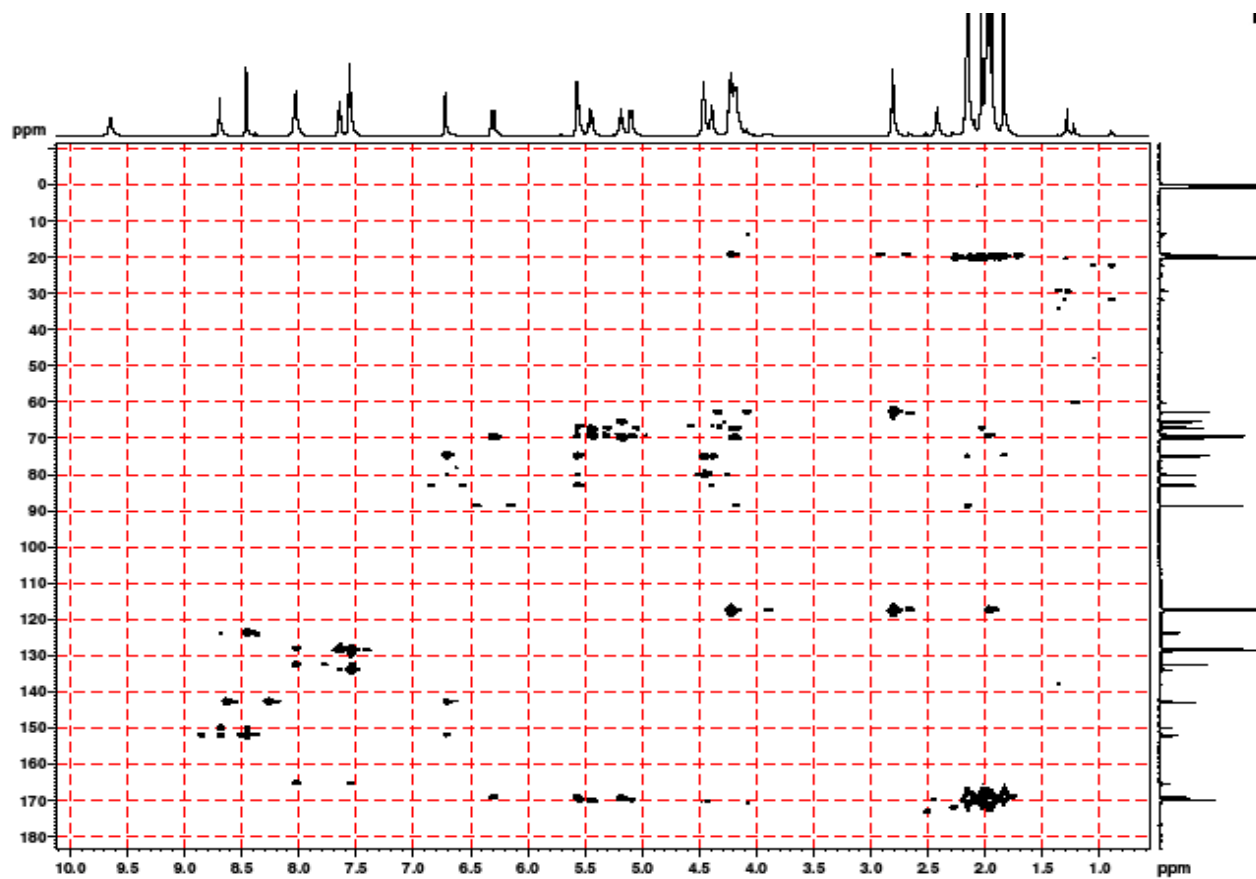



**2-Cyanoethyl-[2',3'-di-*O*-acetyl-1'-(*N*<sup>4</sup>-benzoylcytosinyl)- $\beta$ -D-arabinofuranos-5'-yl]-1,2,3,4-tetra-*O*-acetyl- $\alpha$ -D-glucopyranos-6-yl phosphate (**9i**)**

<sup>1</sup>H-RMN (CD<sub>3</sub>CN, 600 MHz)

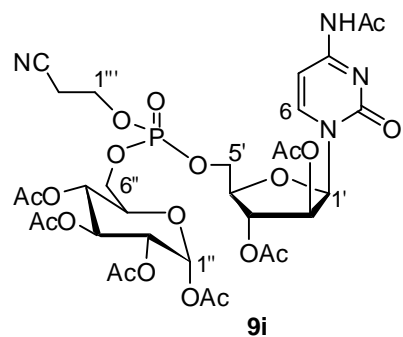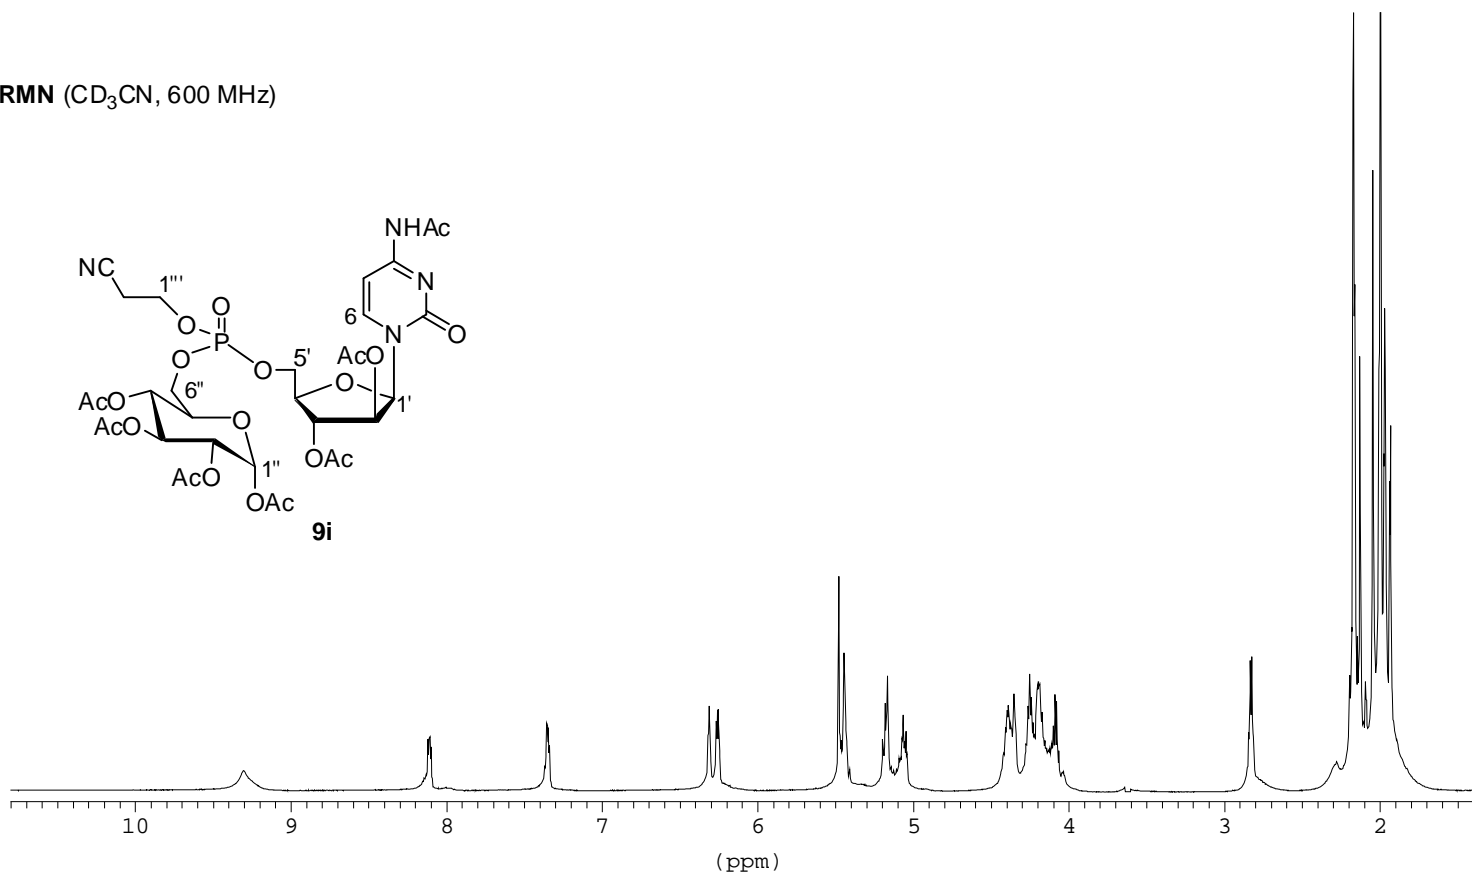

**2-Cyanoethyl-[2',3'-di-*O*-acetyl-1'-(*N*<sup>4</sup>-benzoylcytosinyl)- $\beta$ -D-arabinofuranos-5'-yl]-1,2,3,4-tetra-*O*-acetyl- $\alpha$ -D-glucopyranos-6-yl phosphate (**9i**)**

<sup>13</sup>C-RMN (CD<sub>3</sub>CN, 150.5 MHz)

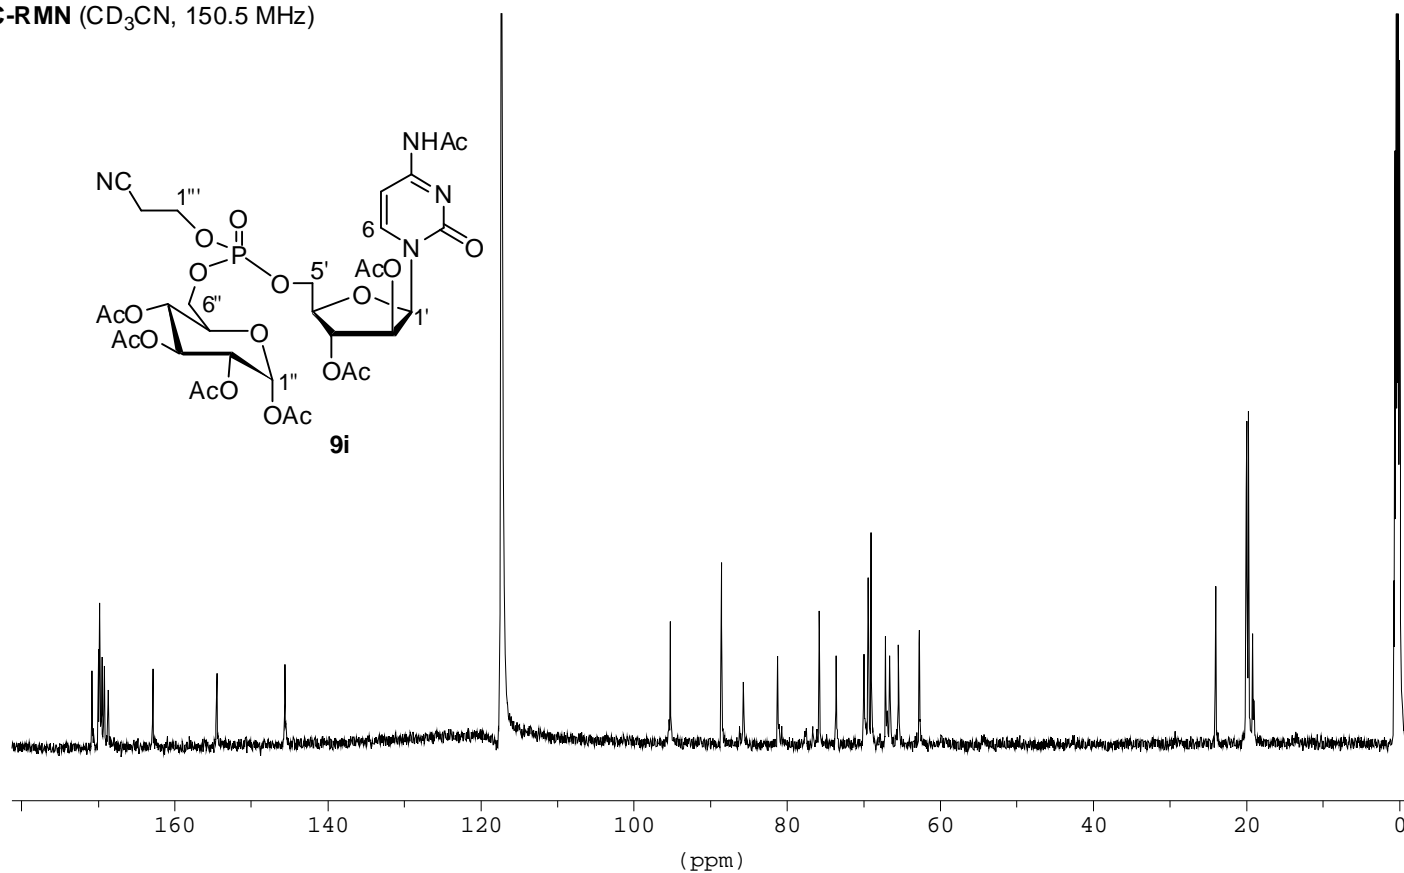

**2-Cyanoethyl-[2',3'-di-O-acetyl-1'-(*N*<sup>4</sup>-benzoylcytosinyl)- $\beta$ -D-arabinofuranos-5'-yl]-1,2,3,4-tetra-O-acetyl- $\alpha$ -D-glucopyranos-6-yl phosphate (**9i**)**

DEPT (CD<sub>3</sub>CN, 150.5 MHz)

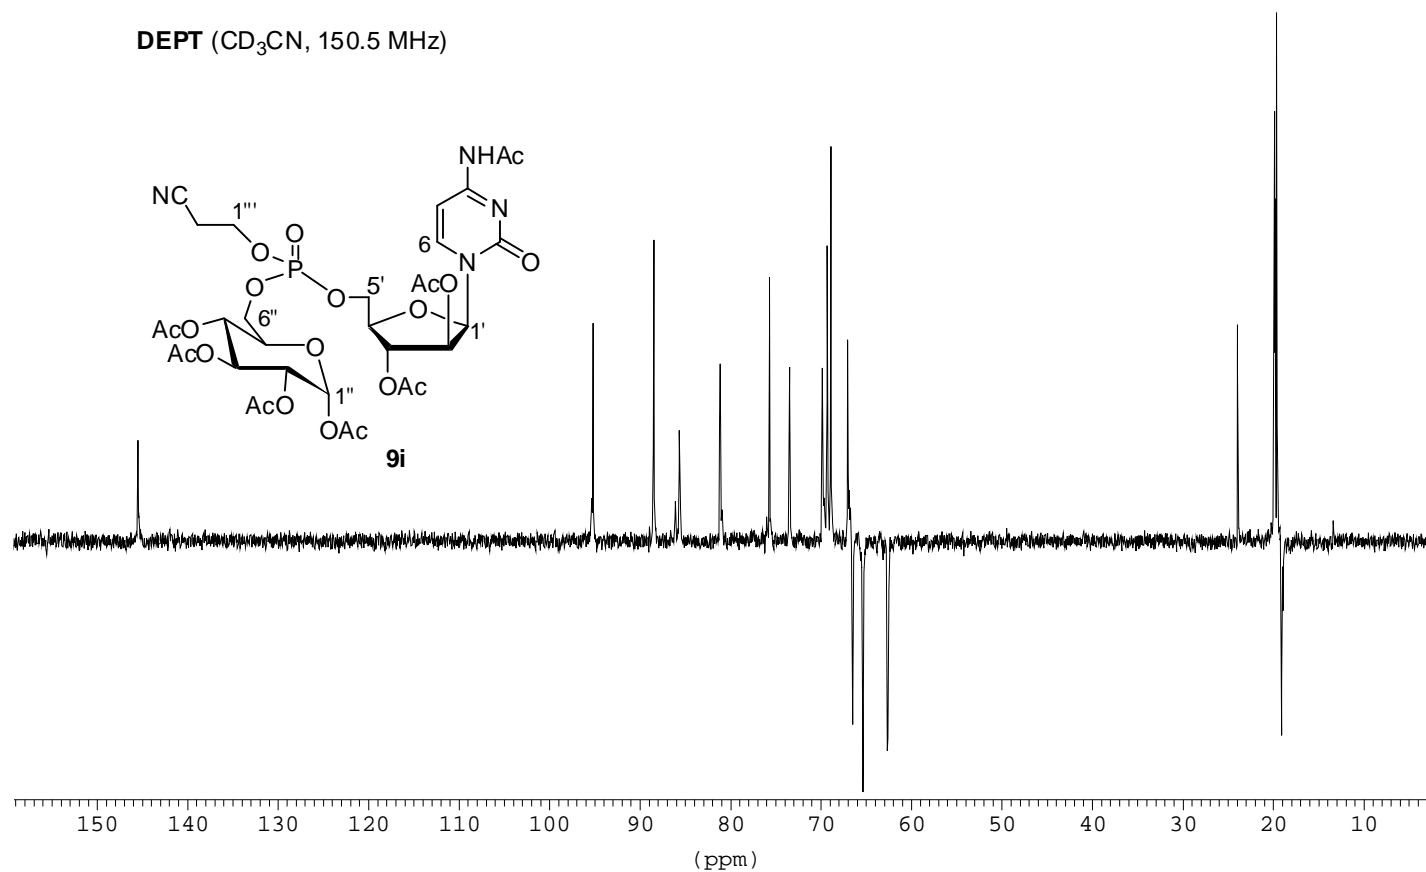

**2-Cyanoethyl-[2',3'-di-*O*-acetyl-1'-(*N*<sup>4</sup>-benzoylcytosinyl)- $\beta$ -D-arabinofuranos-5'-yl]-1,2,3,4-tetra-*O*-acetyl- $\alpha$ -D-glucopyranos-6-yl phosphate (**9i**)**

<sup>31</sup>P-RMN (CD<sub>3</sub>CN, 242.9 MHz)

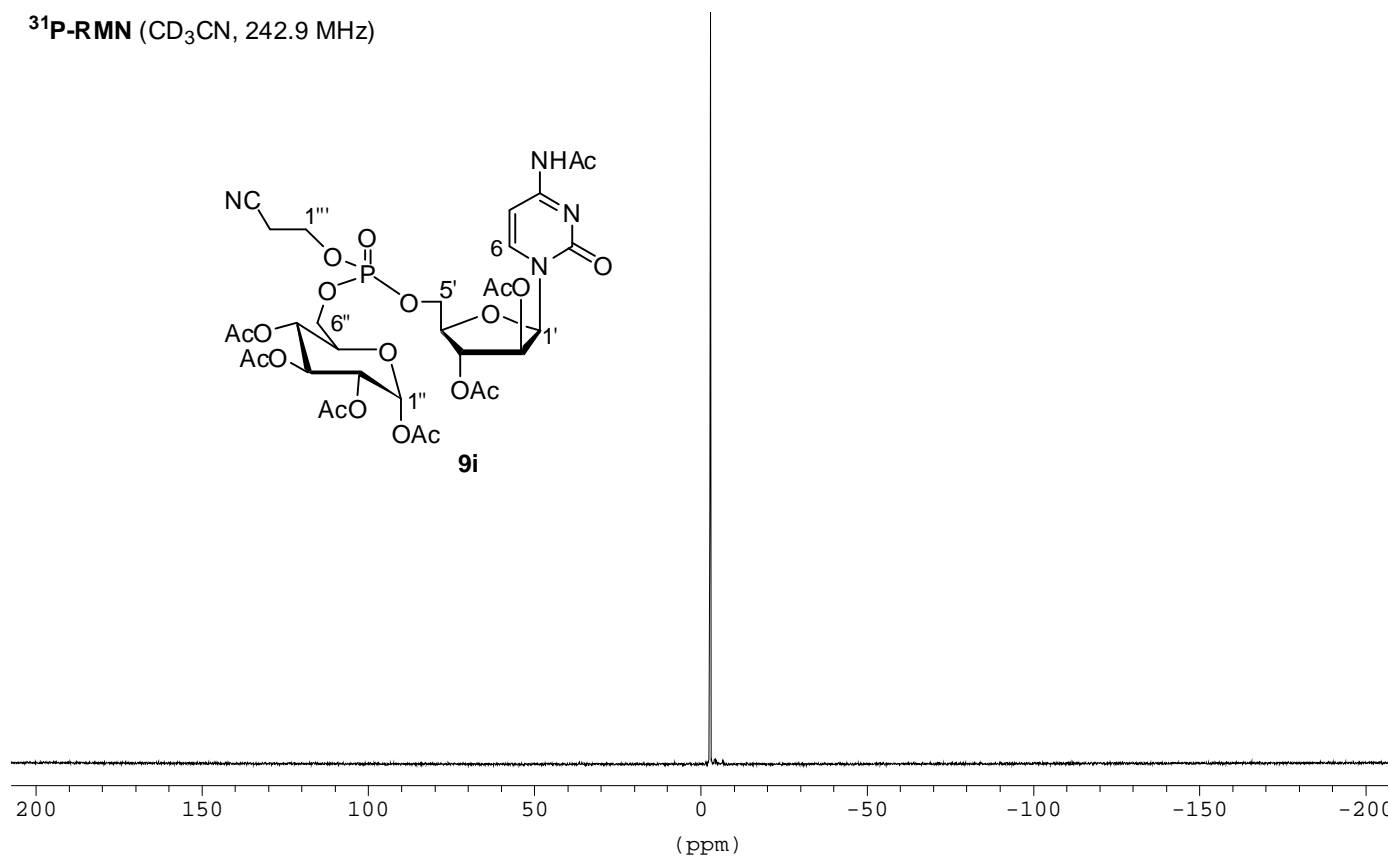

2-Cyanoethyl-[2',3'-di-*O*-acetyl-1'-(*N*<sup>4</sup>-benzoylcytosinyl)- $\beta$ -D-arabinofuranos-5'-yl]-1,2,3,4-tetra-*O*-acetyl- $\alpha$ -D-glucopyranos-6-yl phosphate (9i)

HSQC (CD<sub>3</sub>CN, 600 MHz)

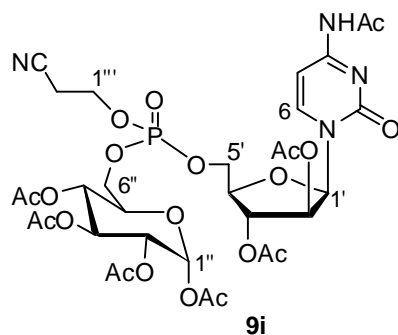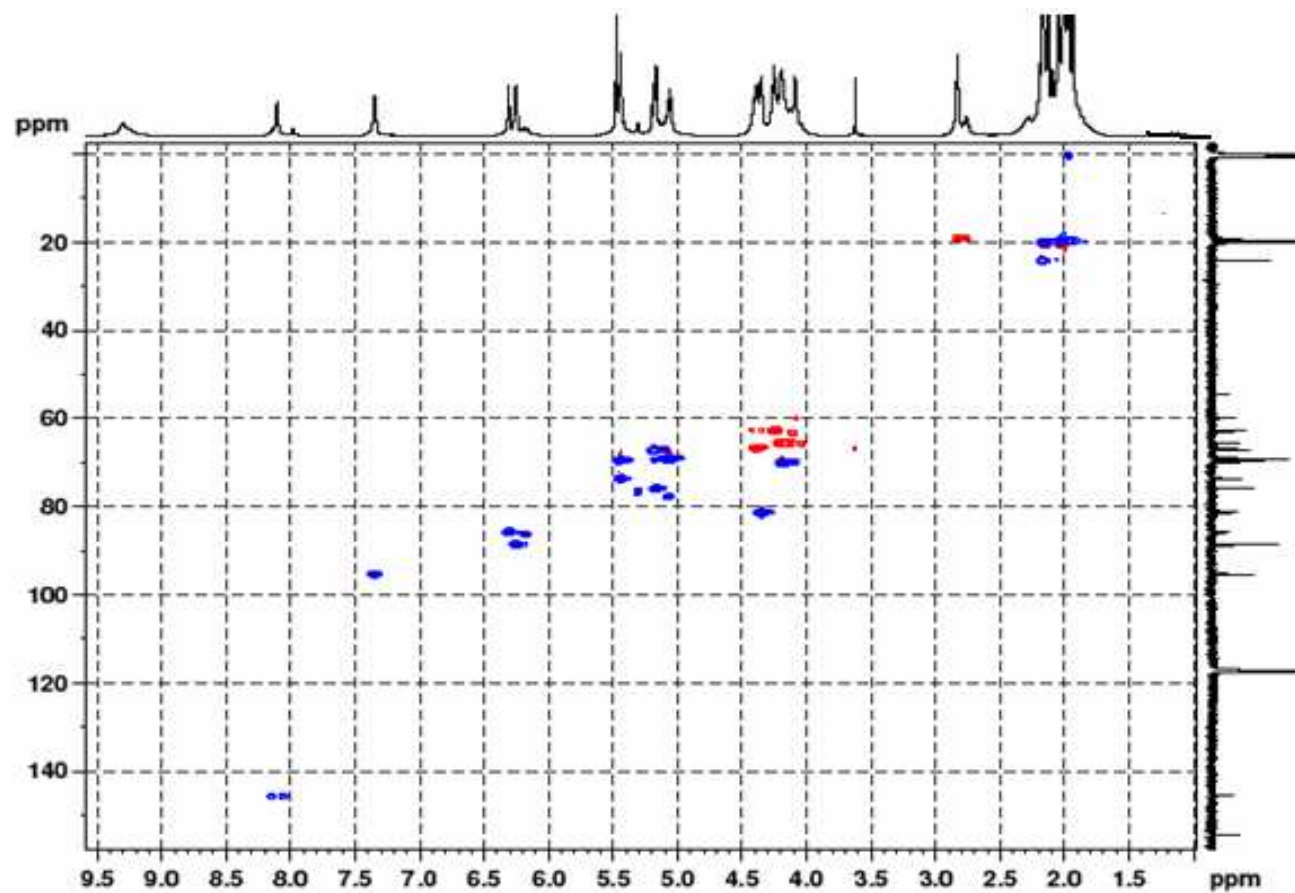

2-Cyanoethyl-[2',3'-di-*O*-acetyl-1'-(*N*<sup>4</sup>-benzoylcytosinyl)- $\beta$ -D-arabinofuranos-5'-yl]-1,2,3,4-tetra-*O*-acetyl- $\alpha$ -D-glucopyranos-6-yl phosphate (9i)

HMBC (CD<sub>3</sub>CN, 600 MHz)

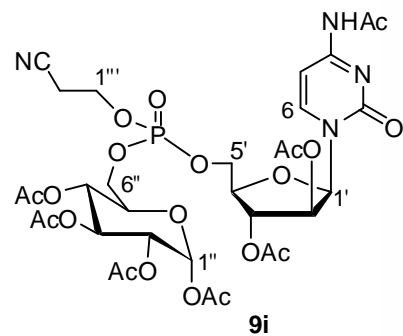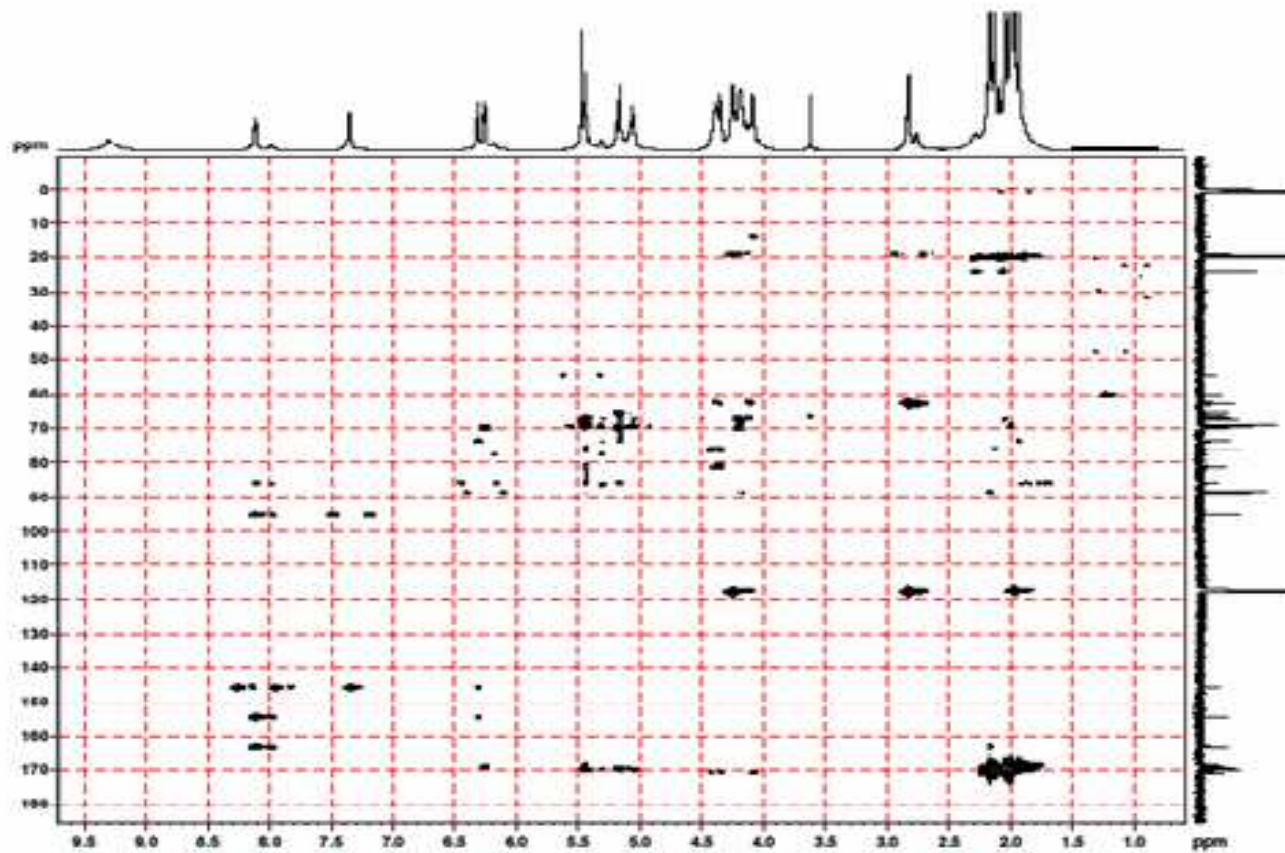

2-Cyanoethyl-[2',3'-di-*O*-acetyl-1'-(*N*<sup>4</sup>-benzoylcytosinyl)- $\beta$ -D-arabinofuranos-5'-yl]-1,2,3,4-tetra-*O*-acetyl- $\alpha$ -D-glucopyranos-6-yl phosphate (9i)

NOESY (CD<sub>3</sub>CN, 600 MHz)

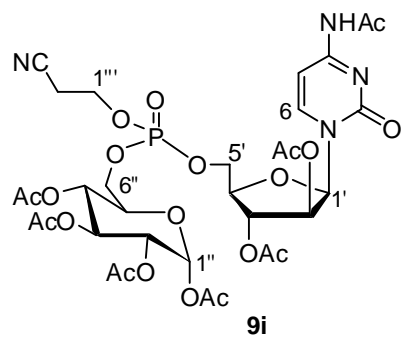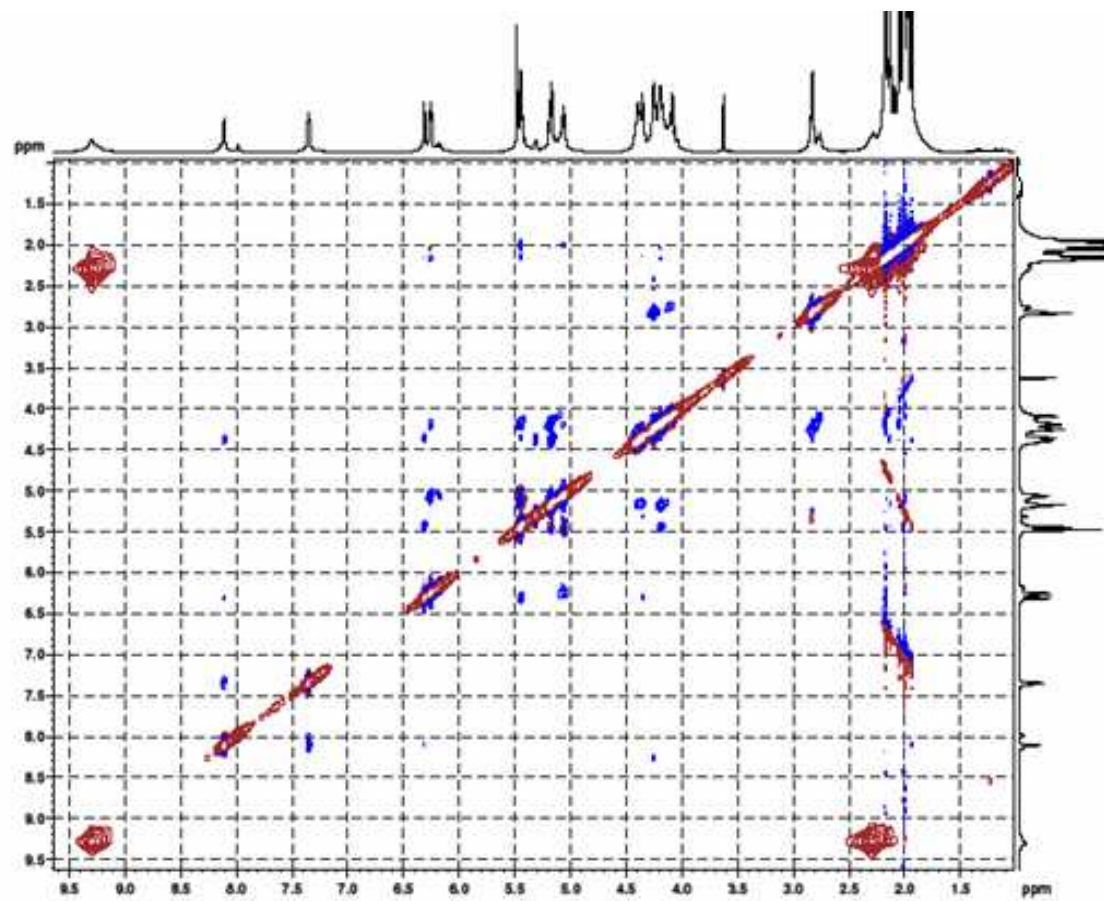

**2',3'-Didehydro-2',3'-dideoxyuridine 5'-( $\alpha/\beta$ -D-glucopyranos-6-yl) phosphate (10a)**

$^1\text{H-RMN}$  ( $\text{D}_2\text{O}$ , 400 MHz)

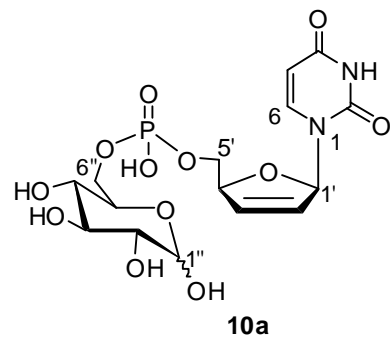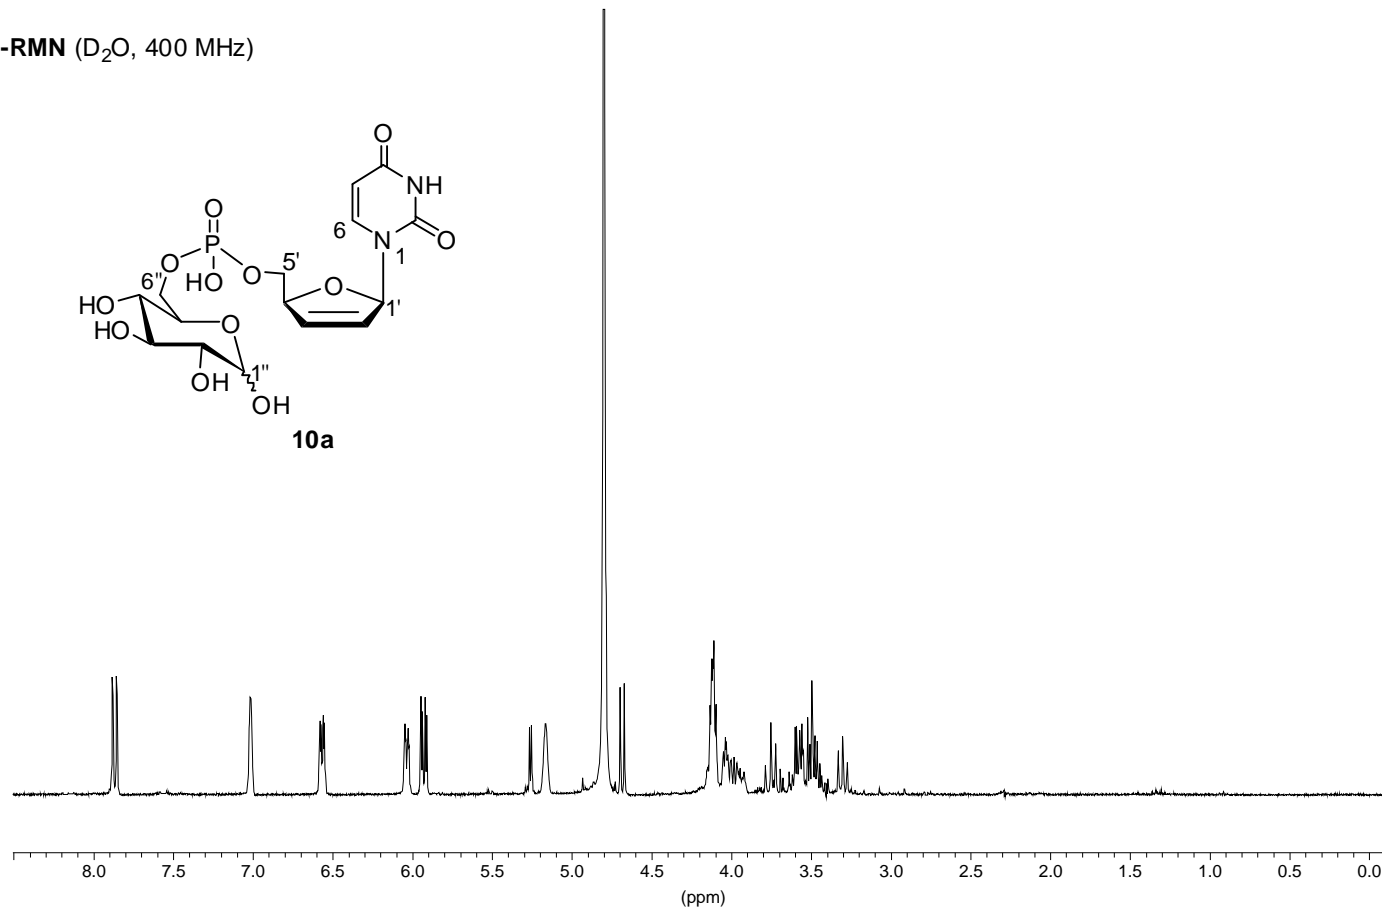



**2',3'-Didehydro-2',3'-dideoxyuridine 5'-( $\alpha/\beta$ -D-glucopyranos-6-yl) phosphate (10a)**

$^{13}\text{C}$ -RMN ( $\text{D}_2\text{O}$ , 100.6 MHz)

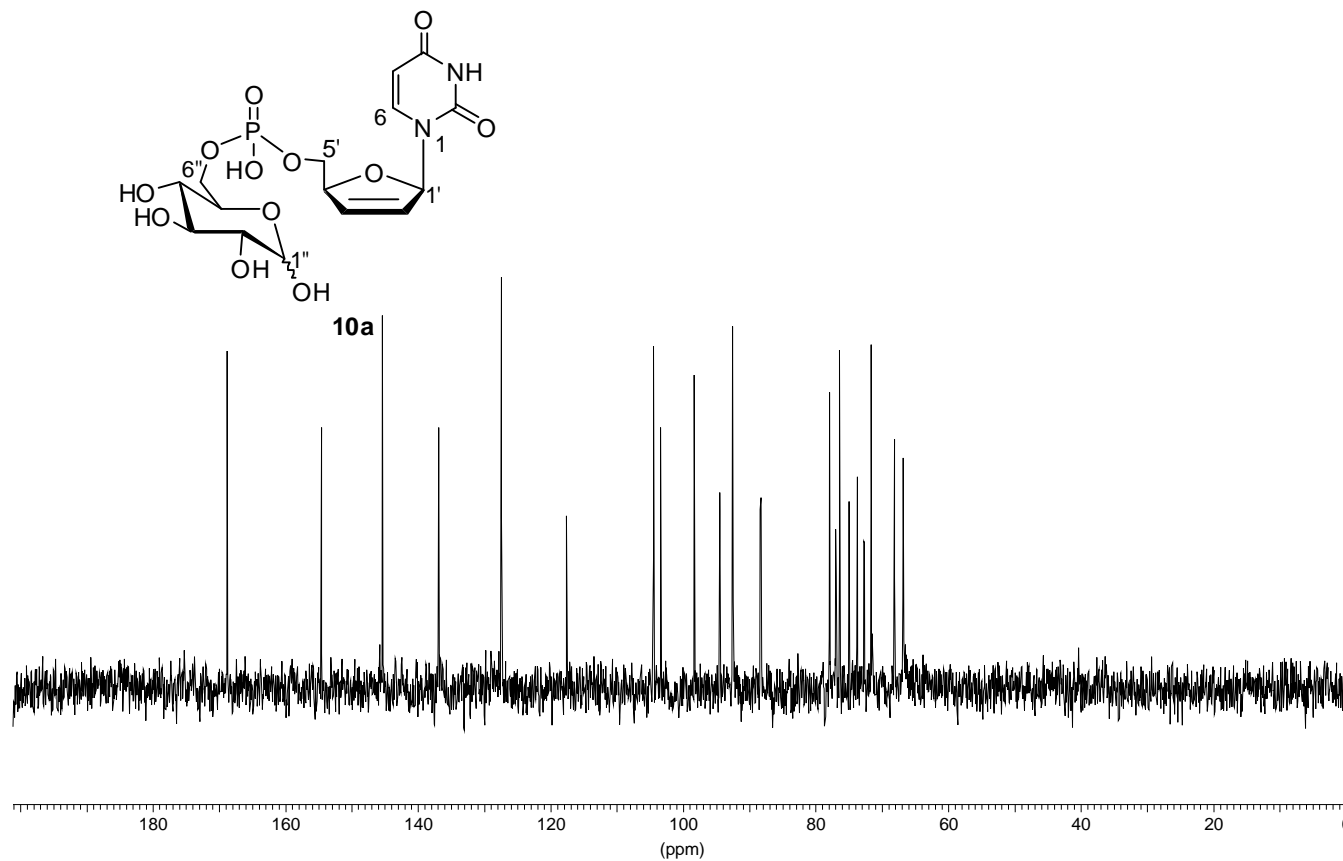

**2',3'-Didehydro-2',3'-dideoxyuridine 5'-( $\alpha/\beta$ -D-glucopyranos-6-yl) phosphate (10a)**

DEPT ( $D_2O$ , 100.6 MHz)

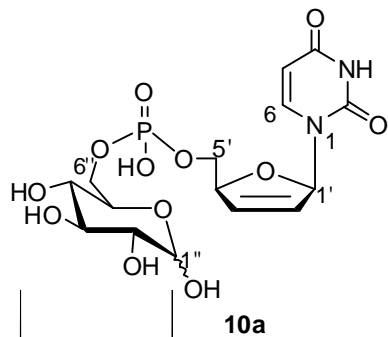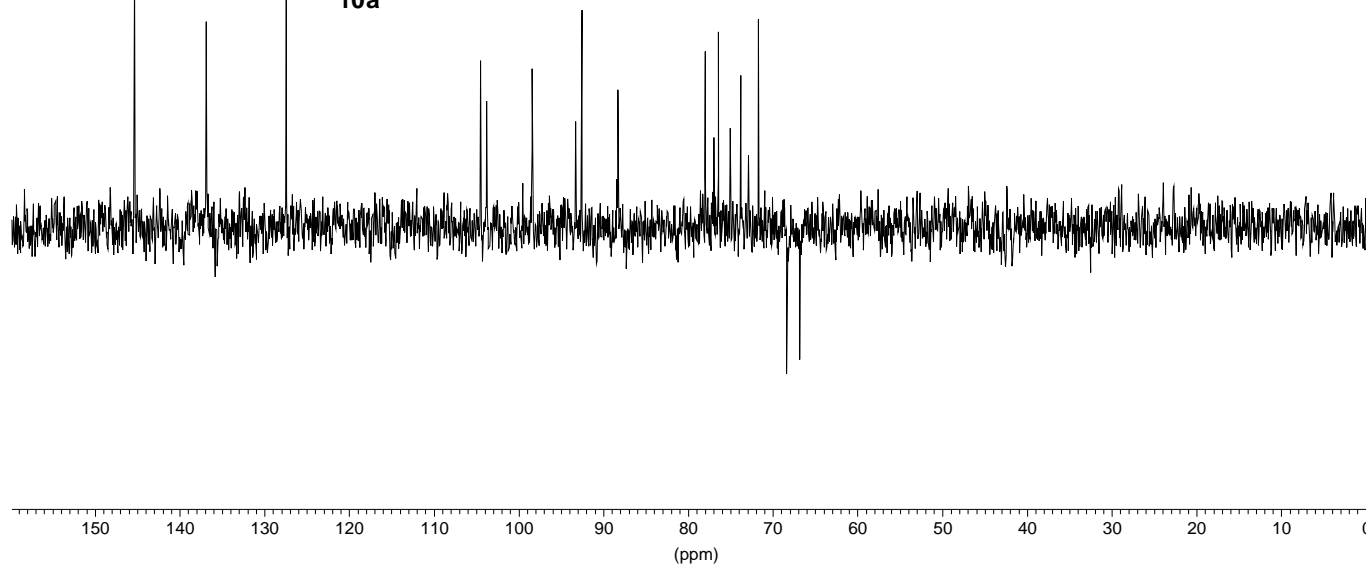

**2',3'-Didehydro-2',3'-dideoxyuridine 5'-( $\alpha/\beta$ -D-glucopyranos-6-yl) phosphate (10a)**

**$^{31}\text{P}$ -RMN** ( $\text{D}_2\text{O}$ , 161.9 MHz)

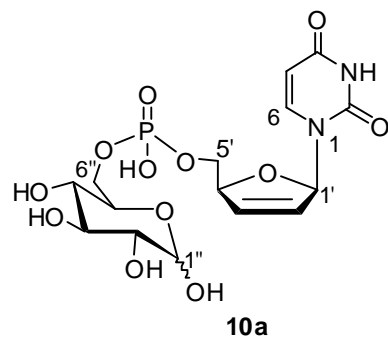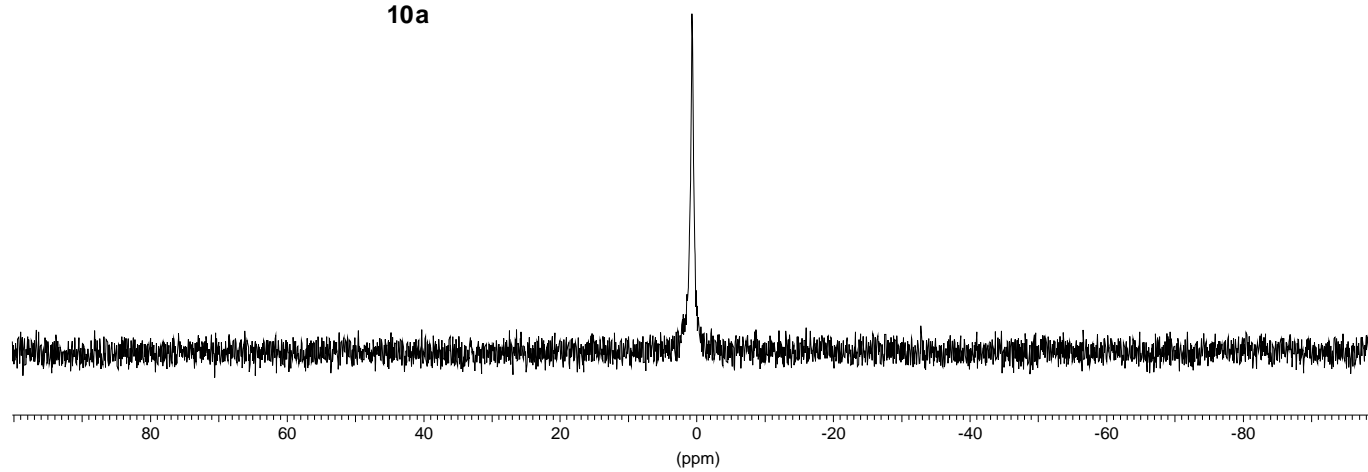

2',3'-Didehydro-2',3'-dideoxyuridine 5'-( $\alpha/\beta$ -D-glucopyranos-6-yl) phosphate (10a)

COSY (D<sub>2</sub>O, 400 MHz)

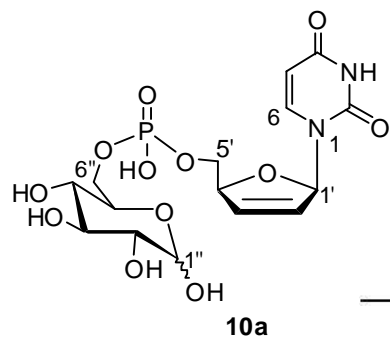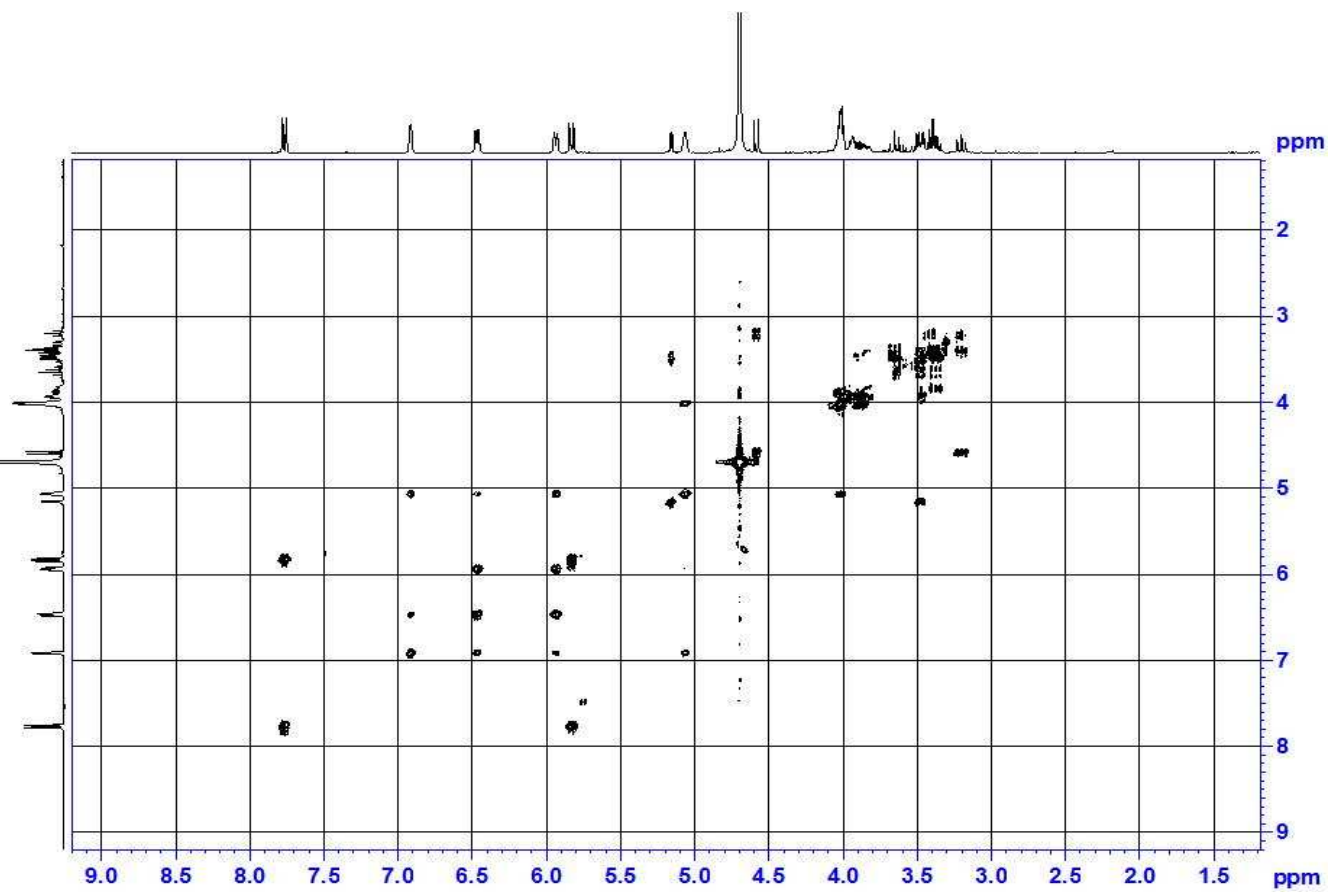

**2',3'-Didehydro-2',3'-dideoxythymidine 5'-( $\alpha/\beta$ -D-glucopyranos-6-yl) phosphate (10b)**

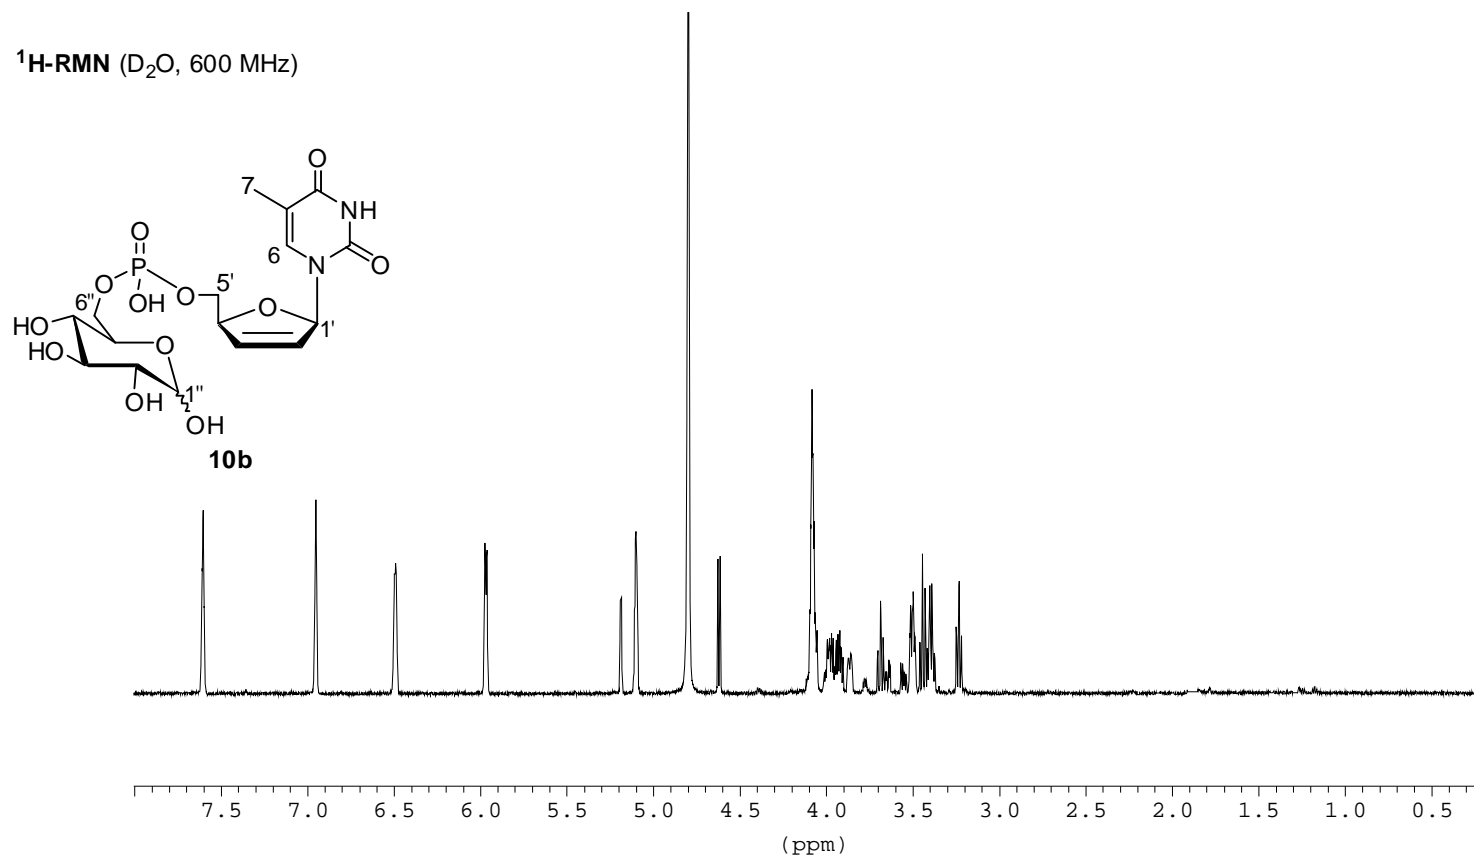

**2',3'-Didehydro-2',3'-dideoxythymidine 5'-( $\alpha/\beta$ -D-glucopyranos-6-yl) phosphate (10b)**

$^{13}\text{C}$ -RMN ( $\text{D}_2\text{O}$ , 150.5 MHz)

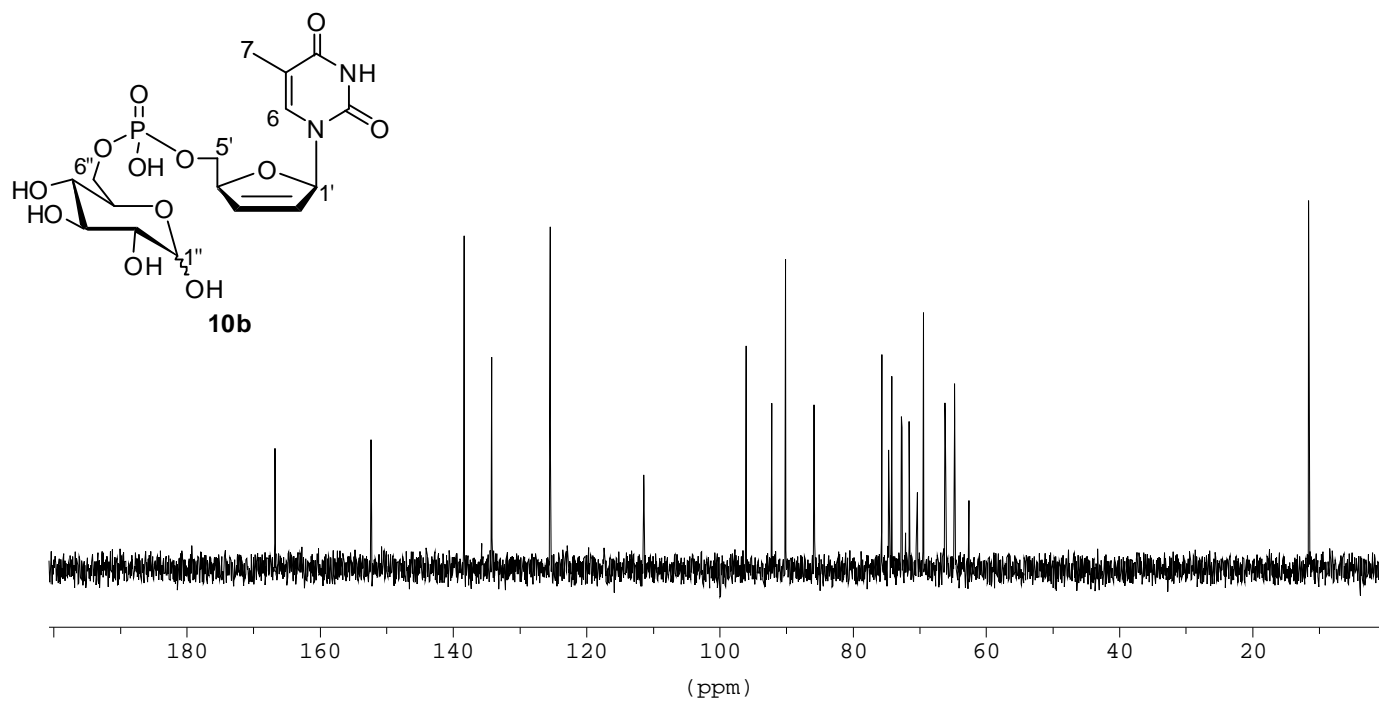

**2',3'-Didehydro-2',3'-dideoxythymidine 5'-( $\alpha/\beta$ -D-glucopyranos-6-yl) phosphate (10b)**

DEPT(D<sub>2</sub>O, 150.5 MHz)

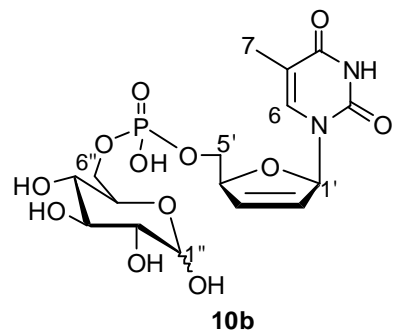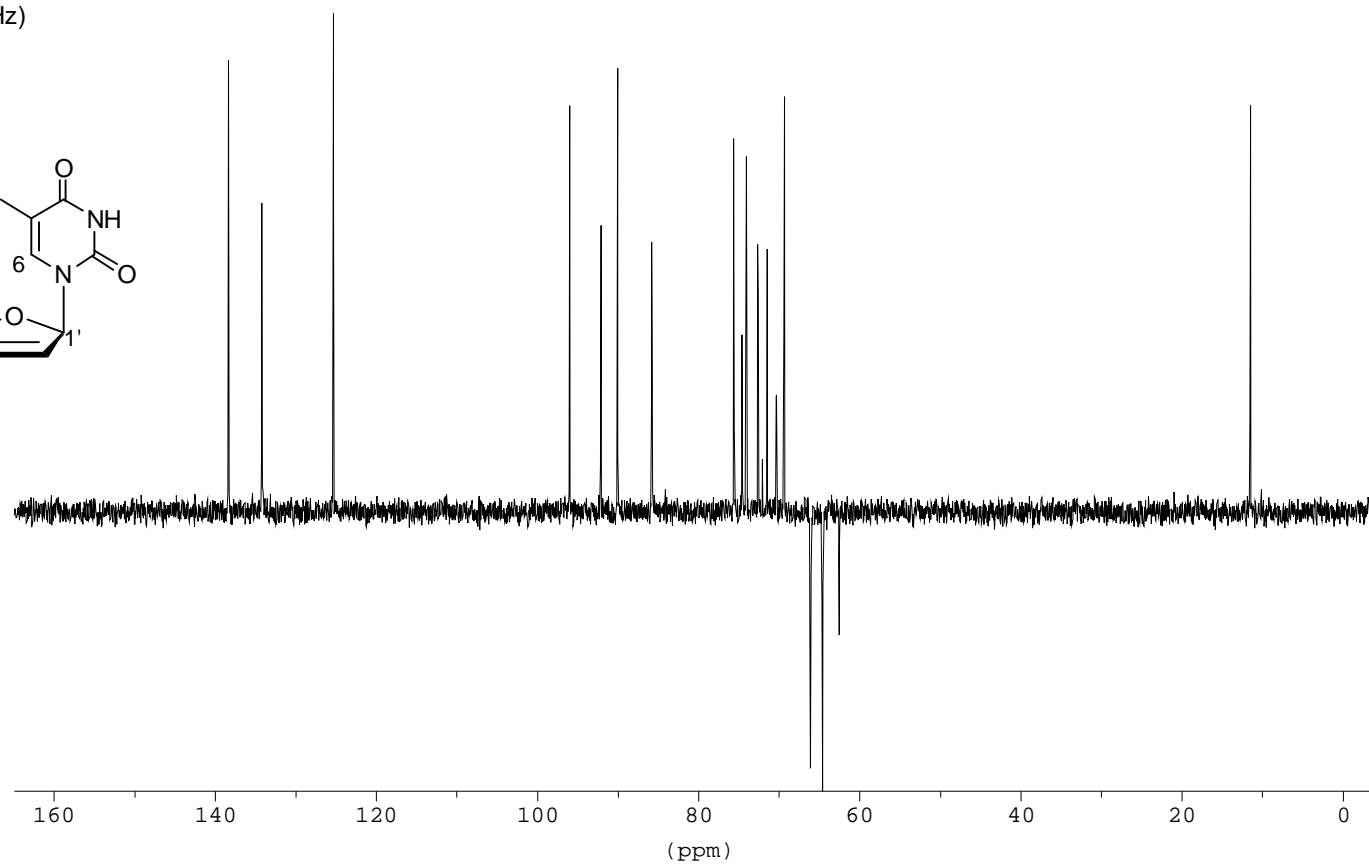

**2',3'-Didehydro-2',3'-dideoxythymidine 5'-( $\alpha/\beta$ -D-glucopyranos-6-yl) phosphate (10b)**

**$^{31}\text{P}$ -RMN (D<sub>2</sub>O, 242.9 MHz)**

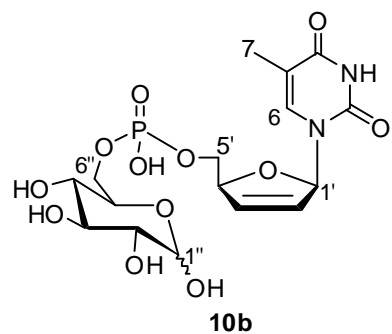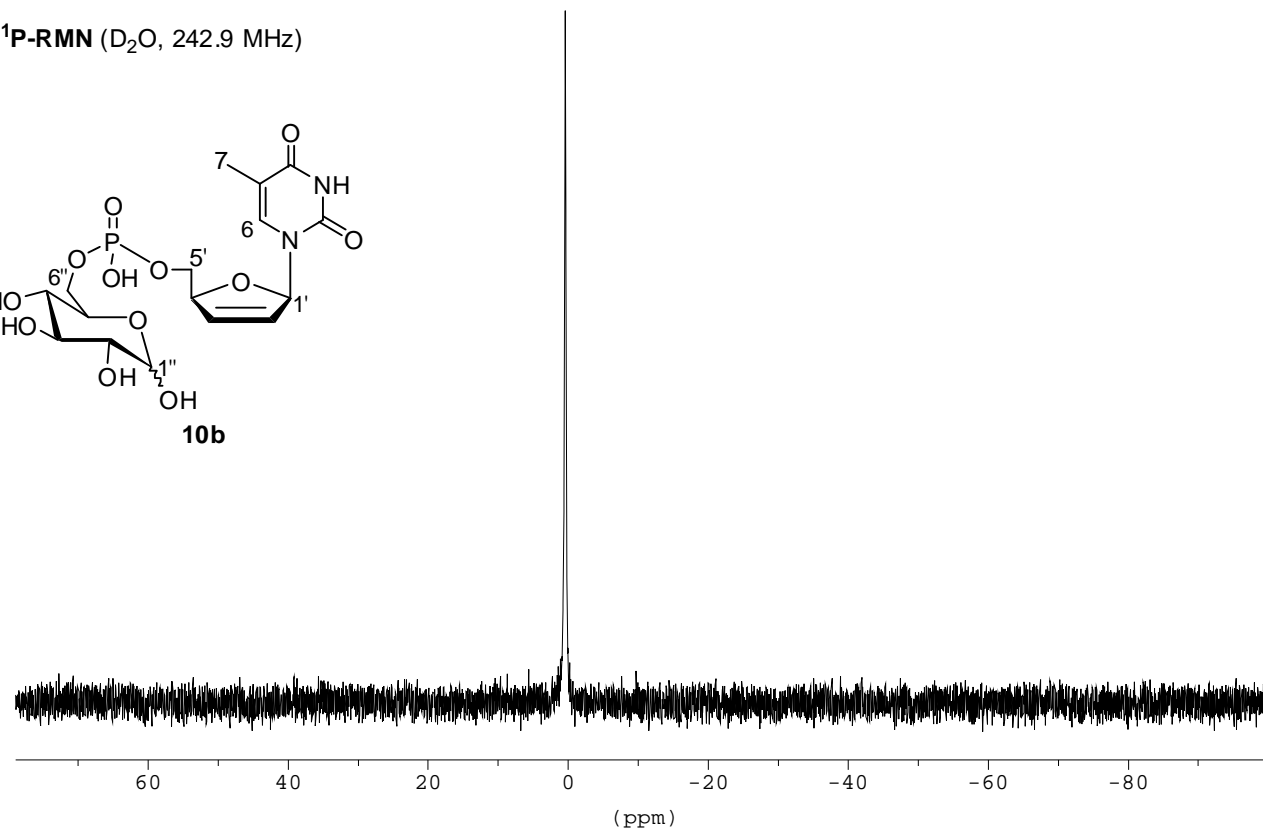



2',3'-Didehydro-2',3'-dideoxythymidine 5'-( $\alpha/\beta$ -D-glucopyranos-6-yl) phosphate (10b)

COSY (D<sub>2</sub>O, 600 MHz)

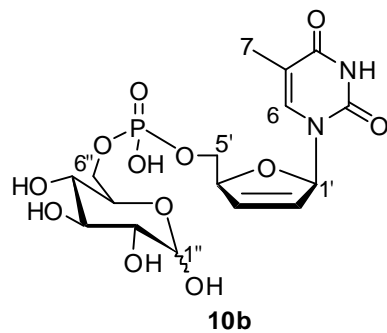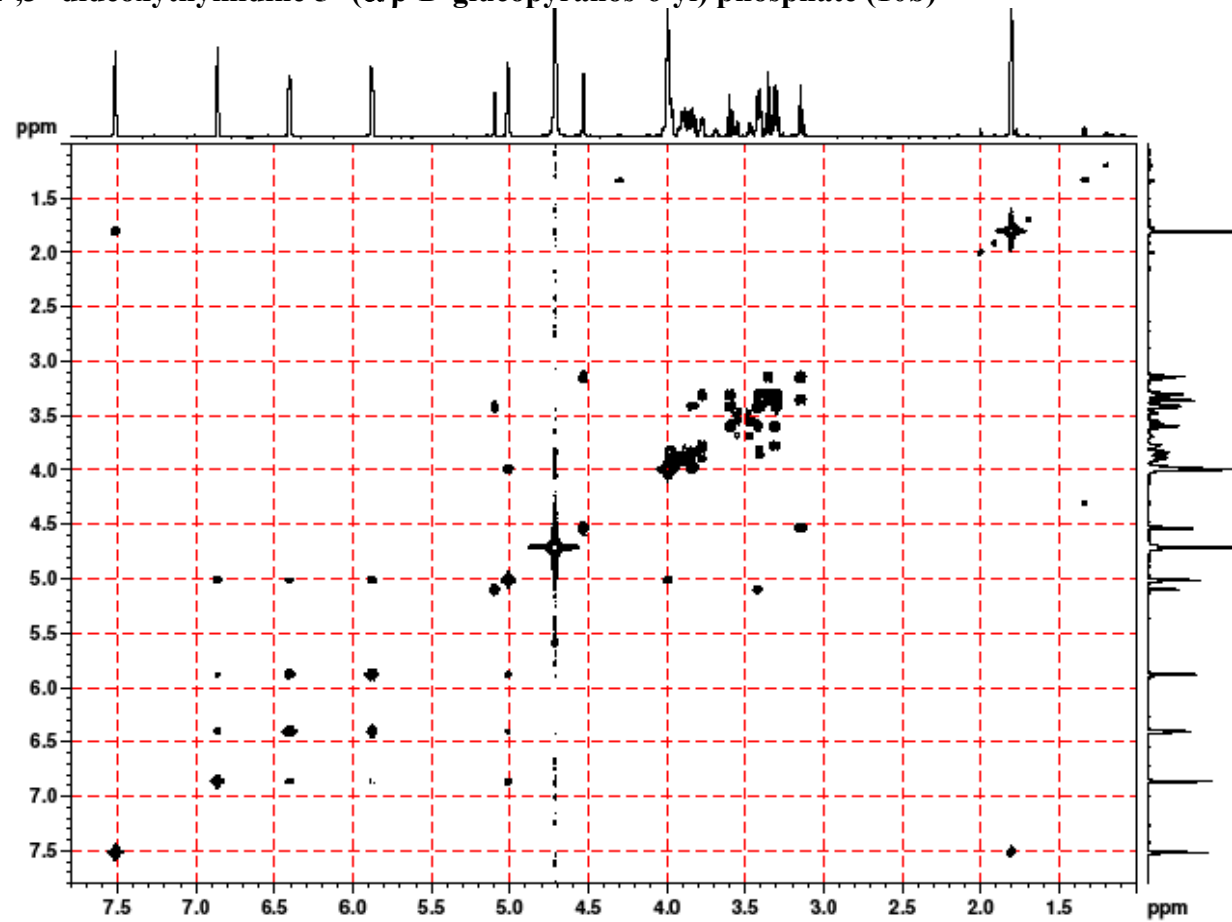

2',3'-Dideohydro-2',3'-dideoxythymidine 5'-( $\alpha/\beta$ -D-glucopyranos-6-yl) phosphate (10b)

HSQC ( $D_2O$ , 600 MHz)

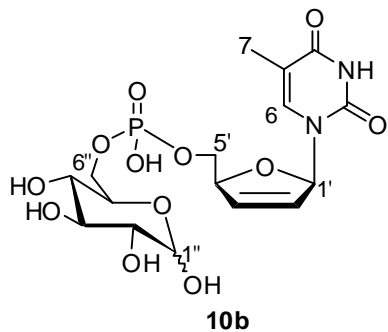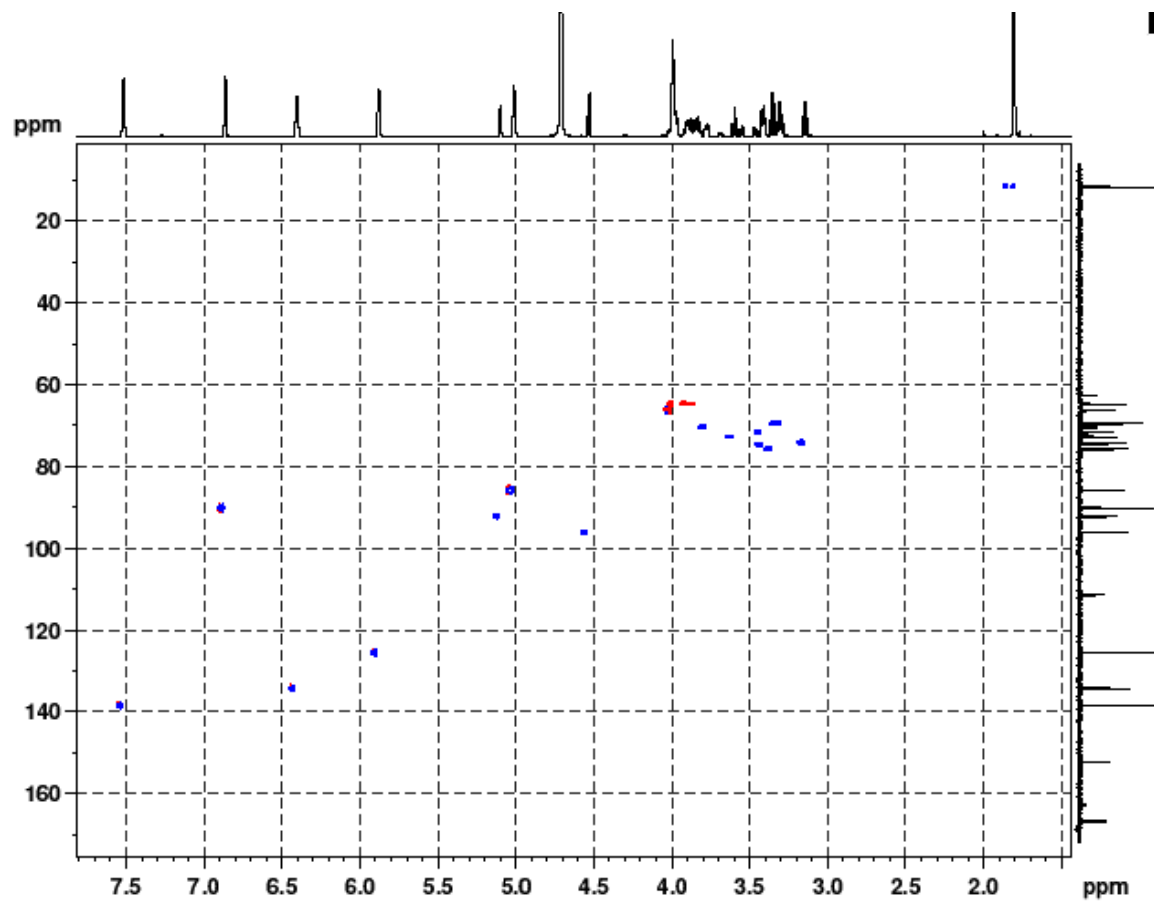

**2'-Deoxy-5-iodouridine 5'-( $\alpha/\beta$ -D-glucopyranos-6-yl) phosphate (10c)**

**$^1\text{H-RMN}$**  ( $\text{D}_2\text{O}$ , 400 MHz)

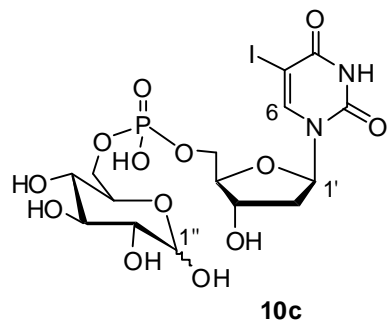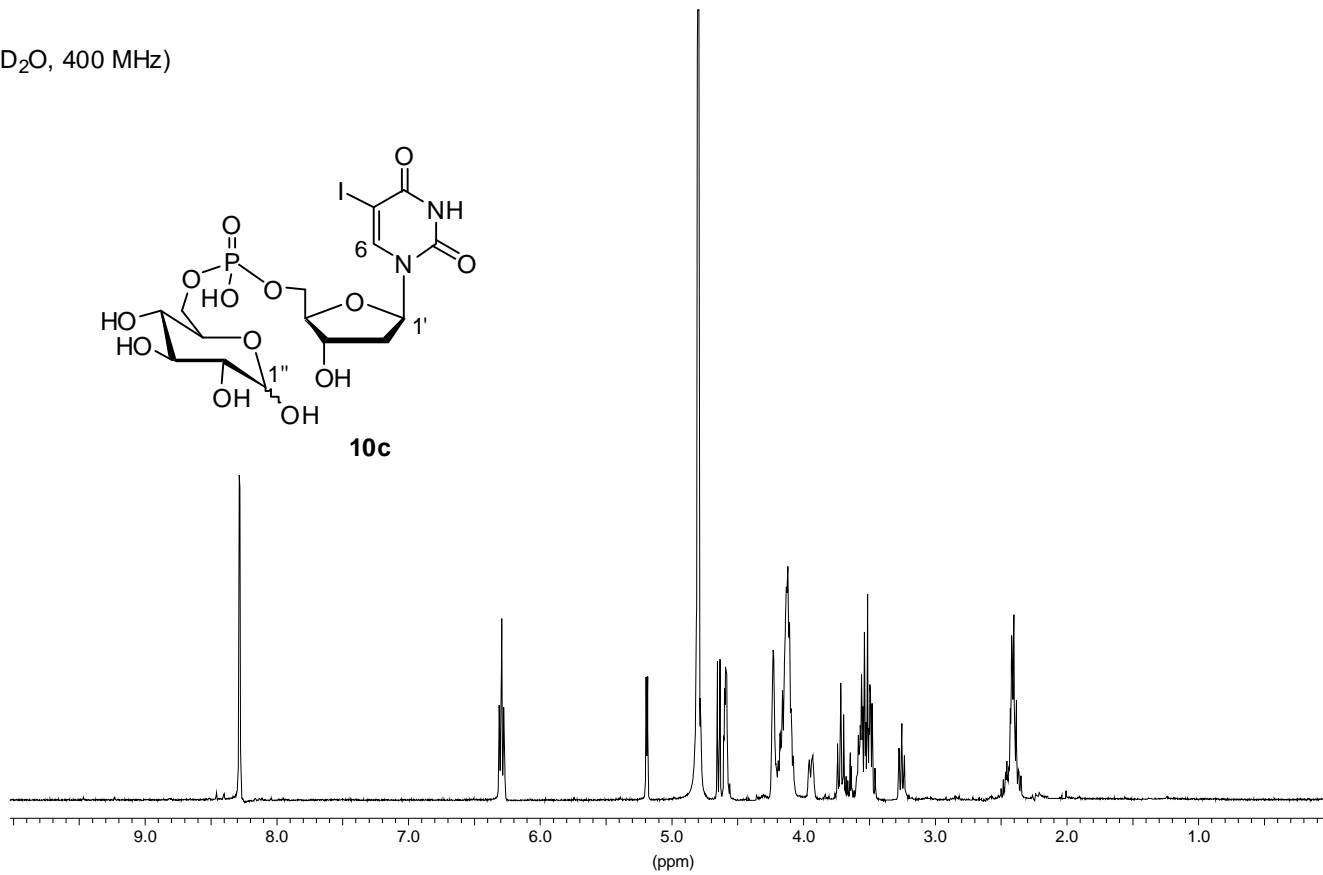

**2'-Deoxy-5-iodouridine 5'-( $\alpha/\beta$ -D-glucopyranos-6-yl) phosphate (10c)**

$^{13}\text{C}$ -RMN ( $\text{D}_2\text{O}$ , 100.6 MHz)

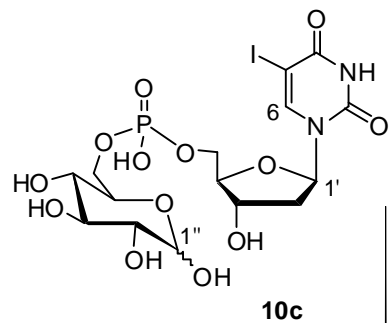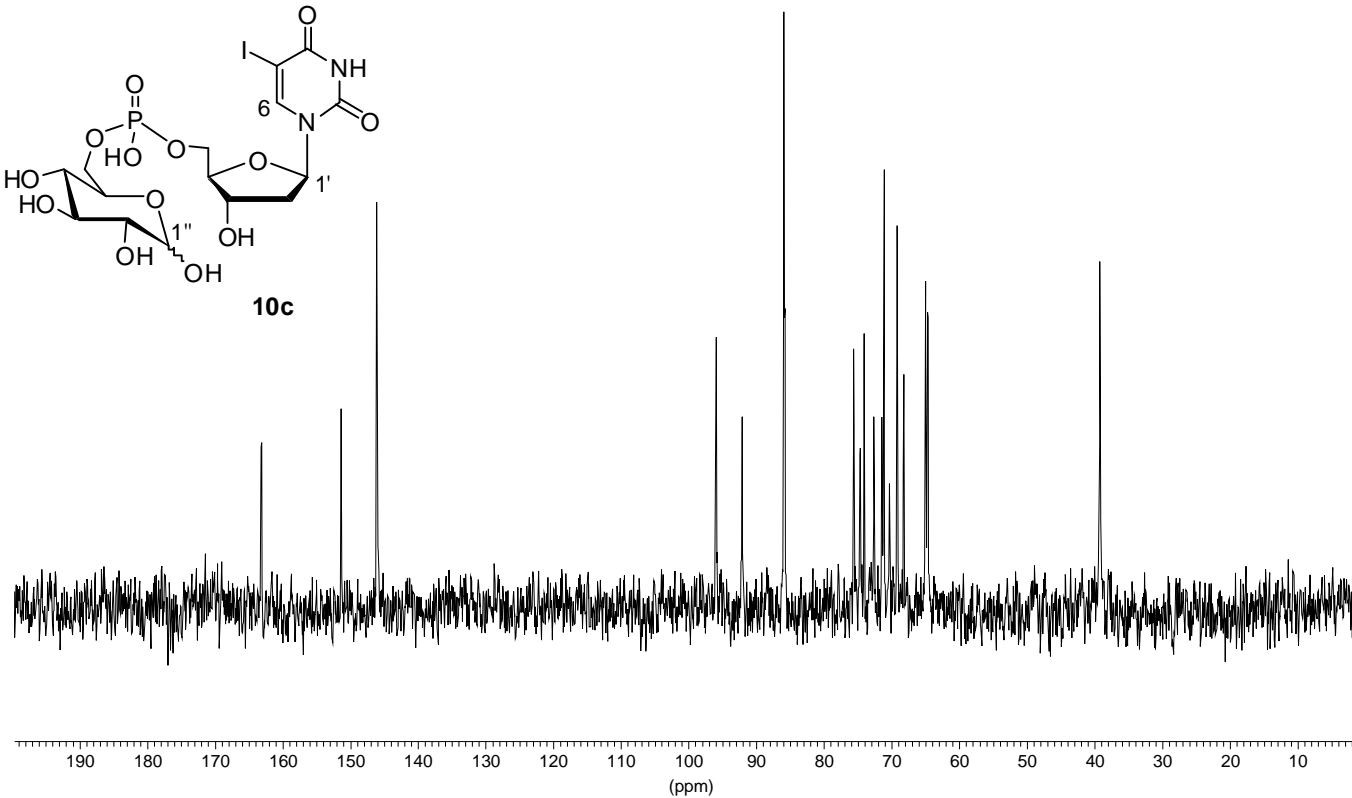

**2'-Deoxy-5-iodouridine 5'-( $\alpha/\beta$ -D-glucopyranos-6-yl) phosphate (10c)**

DEPT (D<sub>2</sub>O, 100.6 MHz)

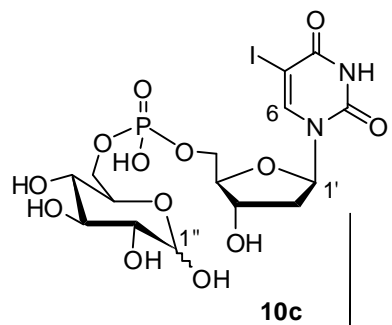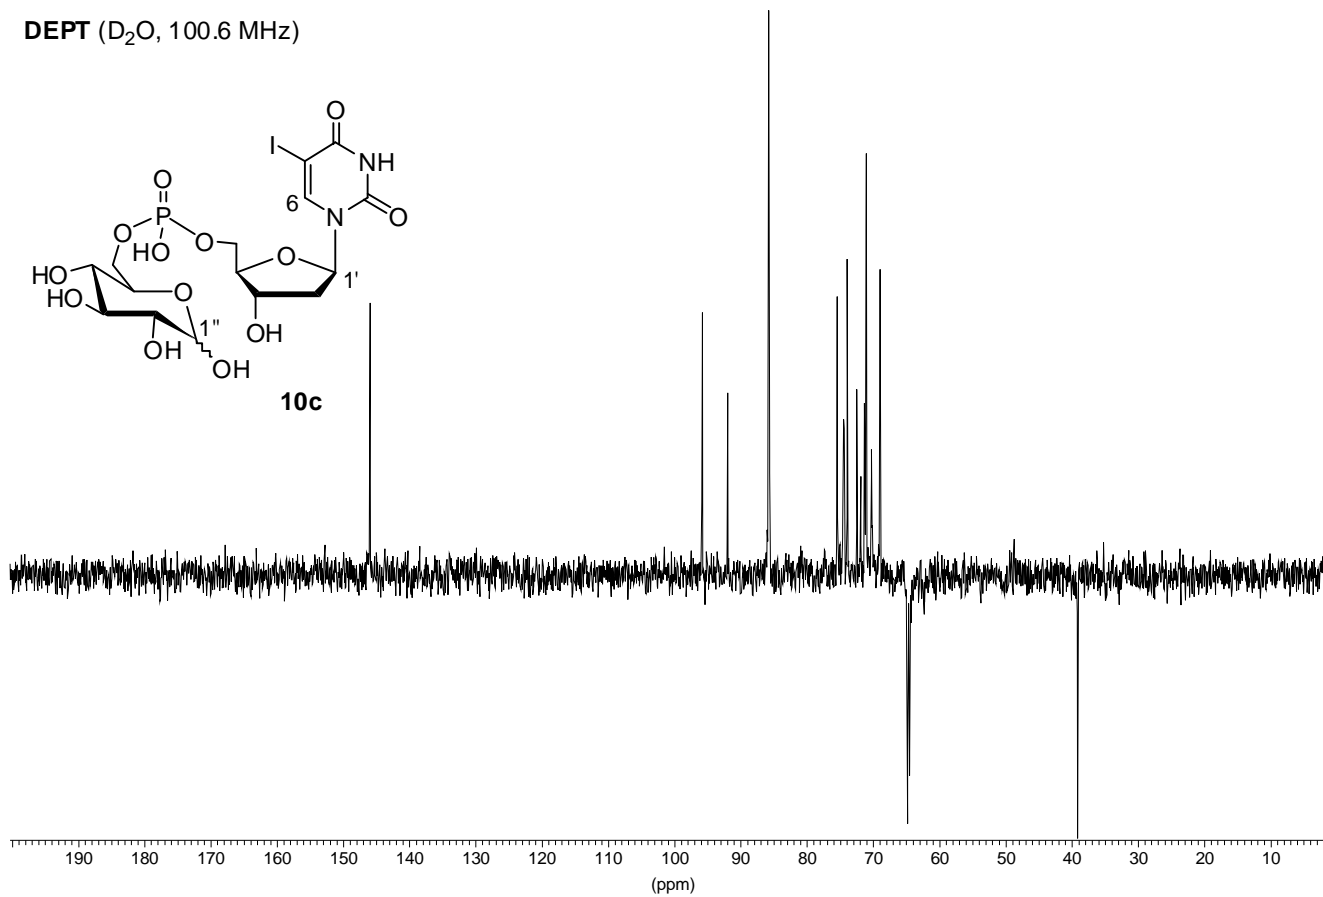

**2'-Deoxy-5-iodouridine 5'-( $\alpha/\beta$ -D-glucopyranos-6-yl) phosphate (10c)**

**$^{31}\text{P}$ -RMN** ( $\text{D}_2\text{O}$ , 161.9 MHz)

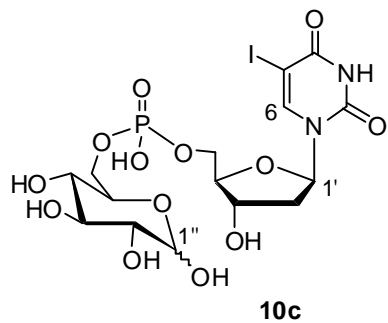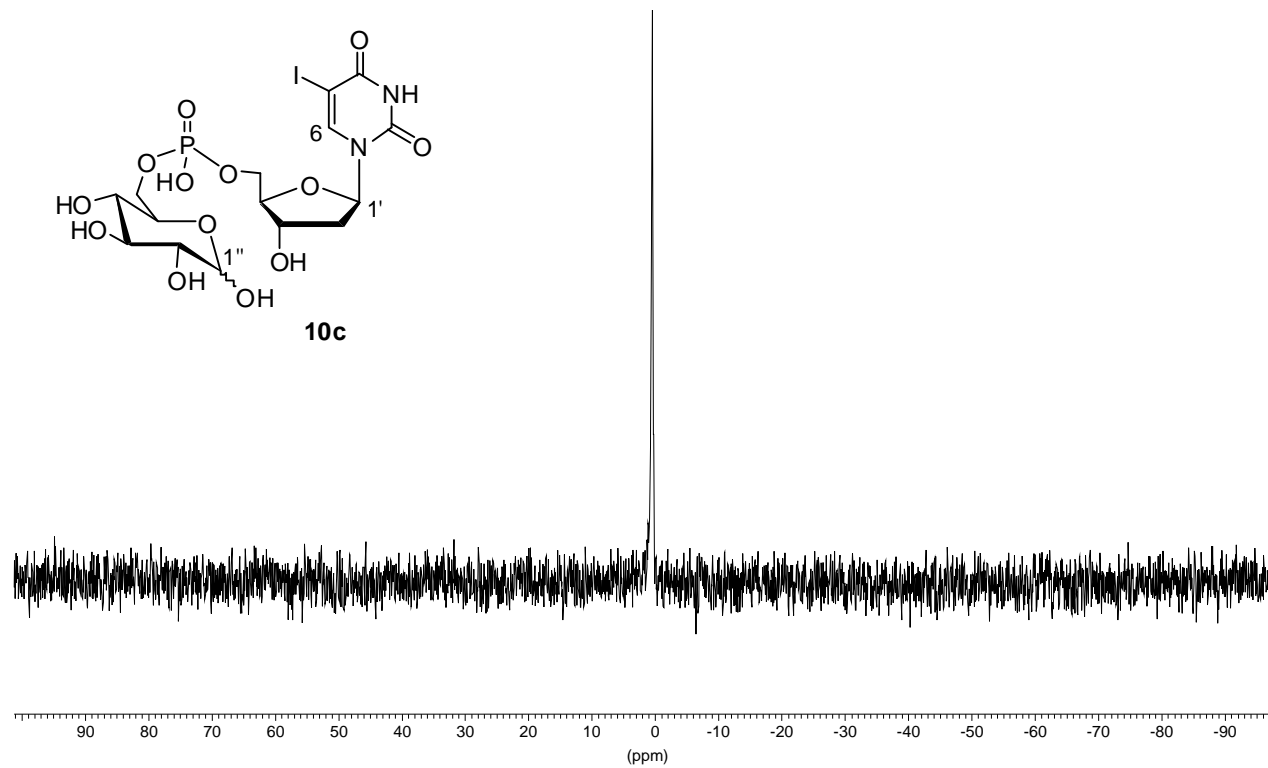

2'-Deoxy-5-iodouridine 5'-( $\alpha/\beta$ -D-glucopyranos-6-yl) phosphate (10c)

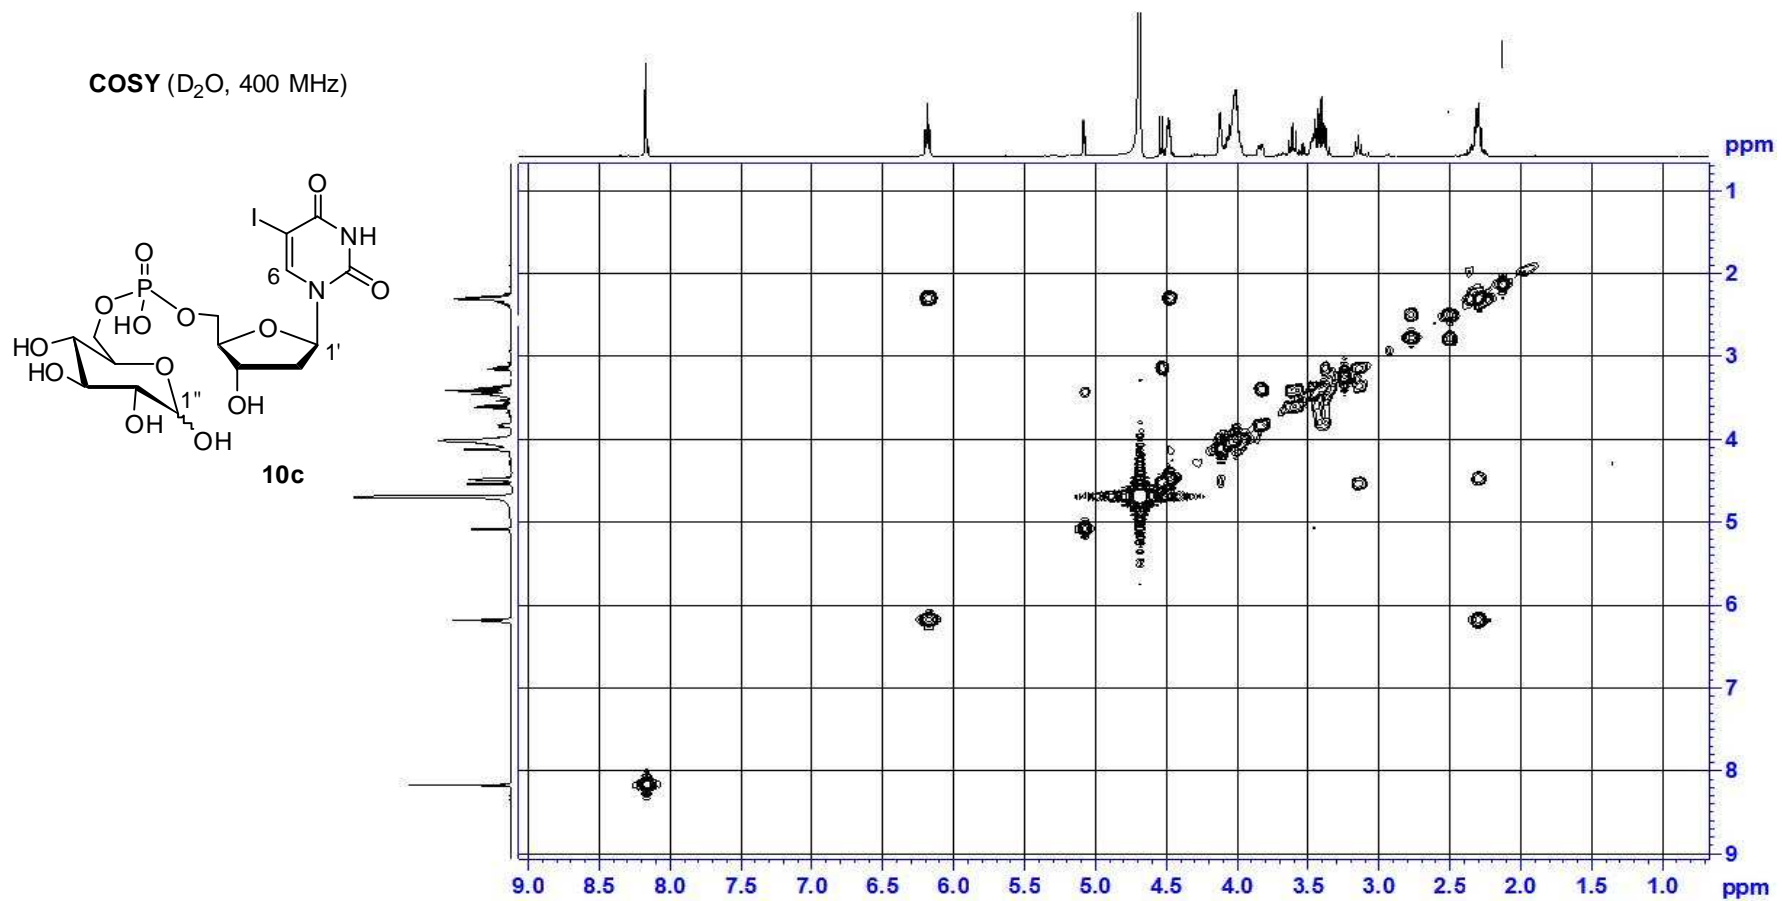

**2'-Deoxy-5-iodouridine 3'-( $\alpha/\beta$ -D-glucopyranos-6-yl) phosphate (10d)**

$^1\text{H-RMN}$  ( $\text{D}_2\text{O}$ , 400 MHz)

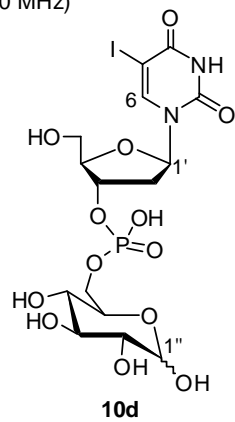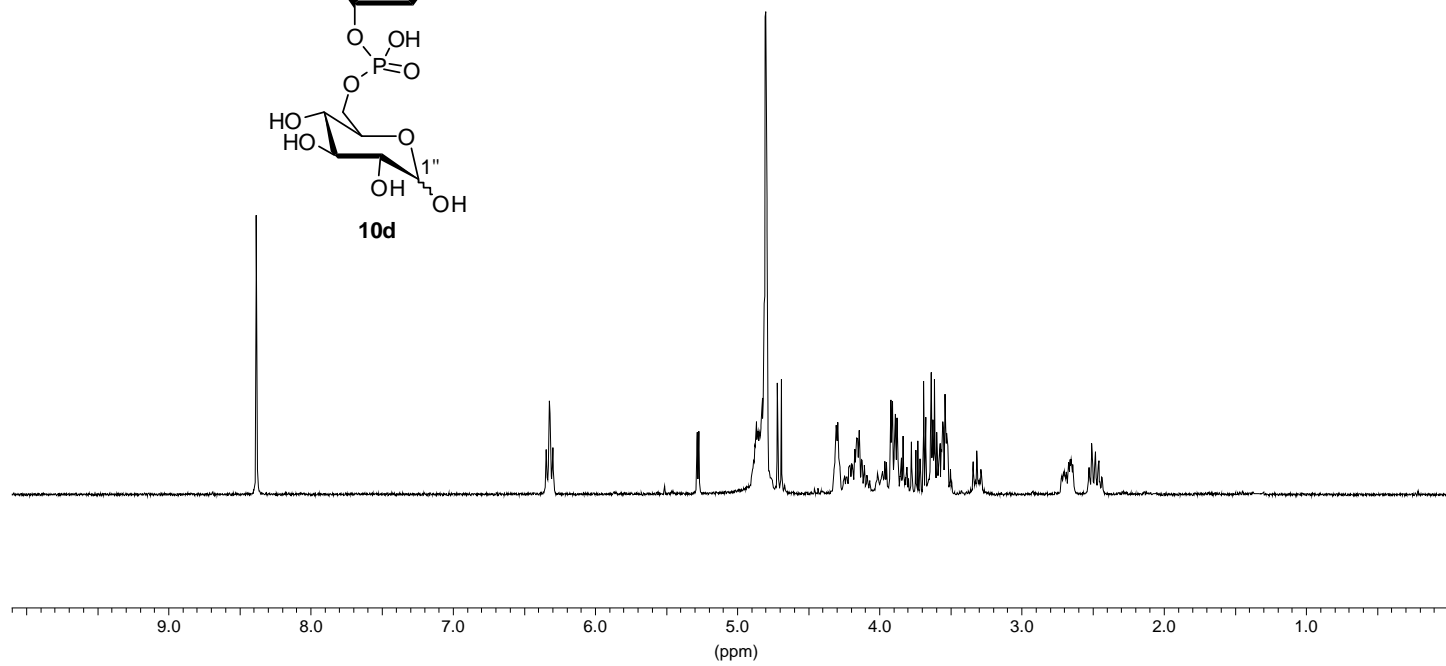



**2'-Deoxy-5-iodouridine 3'-( $\alpha/\beta$ -D-glucopyranos-6-yl) phosphate (10d)**

<sup>13</sup>C-RMN (D<sub>2</sub>O, 100.6 MHz)

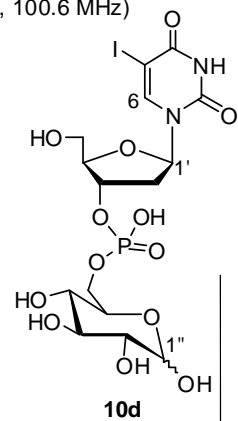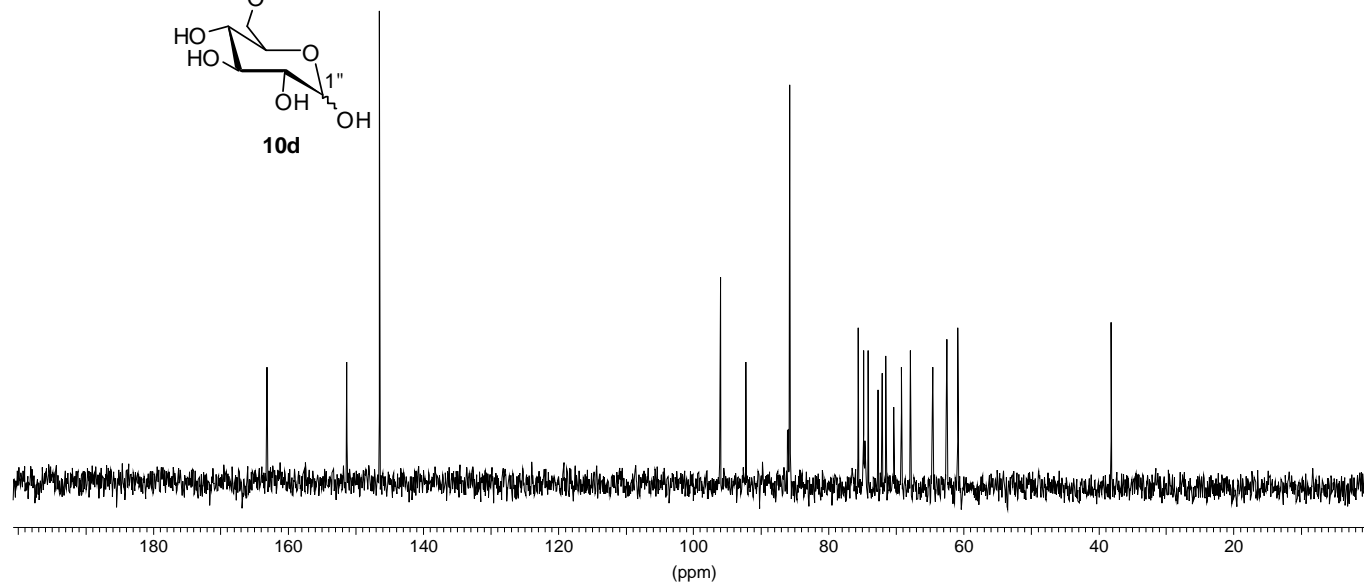

**2'-Deoxy-5-iodouridine 3'-( $\alpha/\beta$ -D-glucopyranos-6-yl) phosphate (10d)**

DEPT ( $D_2O$ , 100.6 MHz)

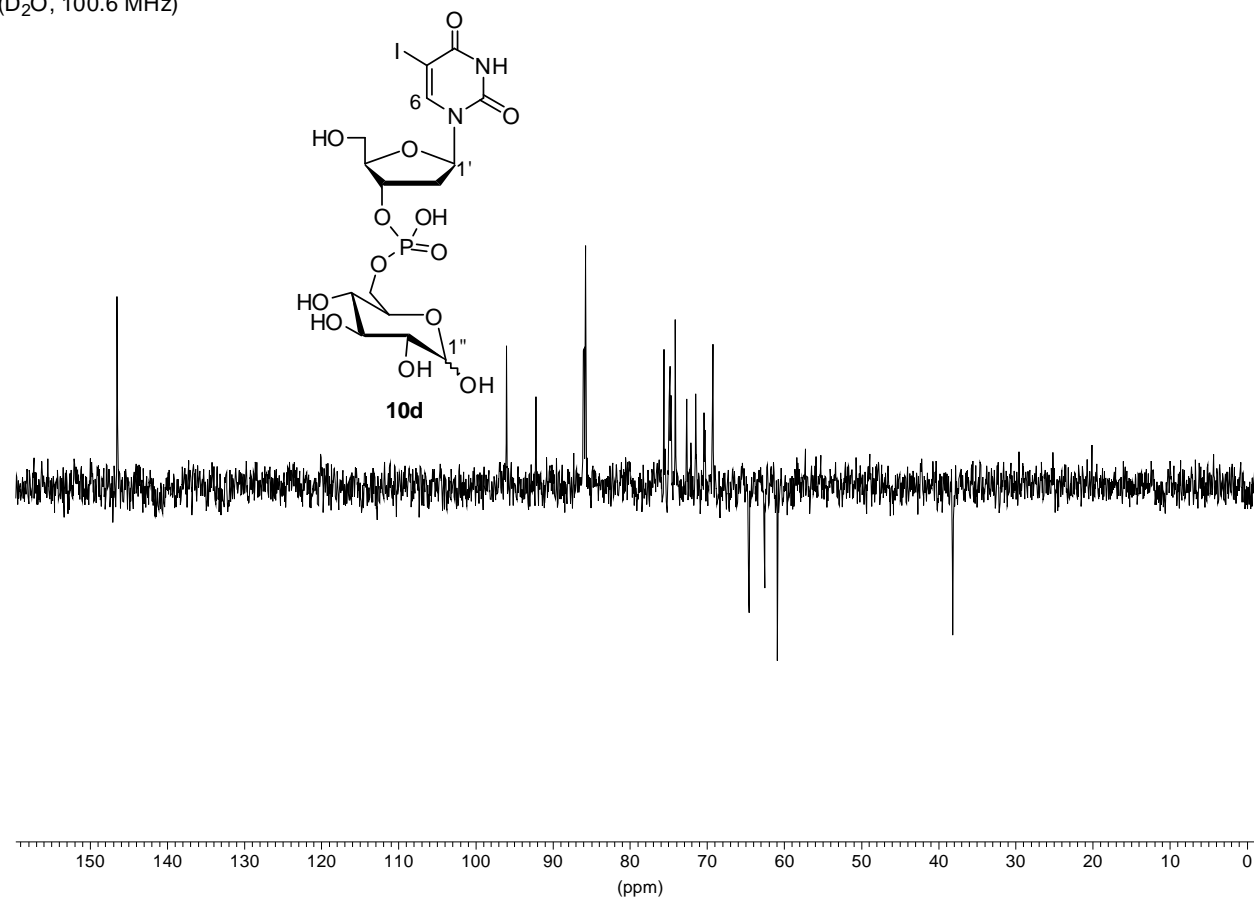

**2'-Deoxy-5-iodouridine 3'-( $\alpha/\beta$ -D-glucopyranos-6-yl) phosphate (10d)**

$^{31}\text{P}$ -RMN ( $\text{D}_2\text{O}$ , 161.9 MHz)

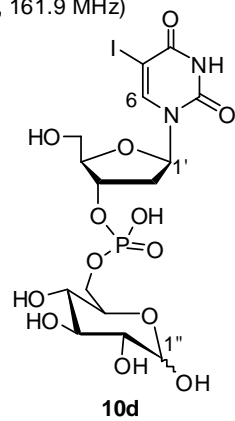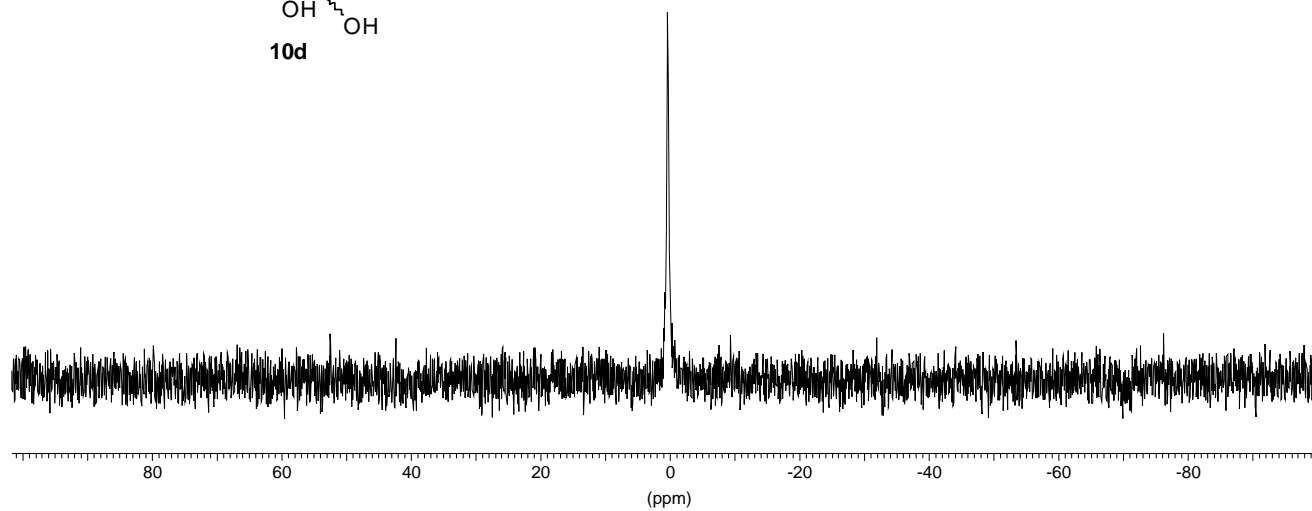

2'-Deoxy-5-iodouridine 3'-( $\alpha/\beta$ -D-glucopyranos-6-yl) phosphate (10d)

COSY (D<sub>2</sub>O, 400 MHz)

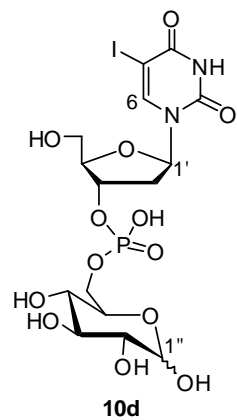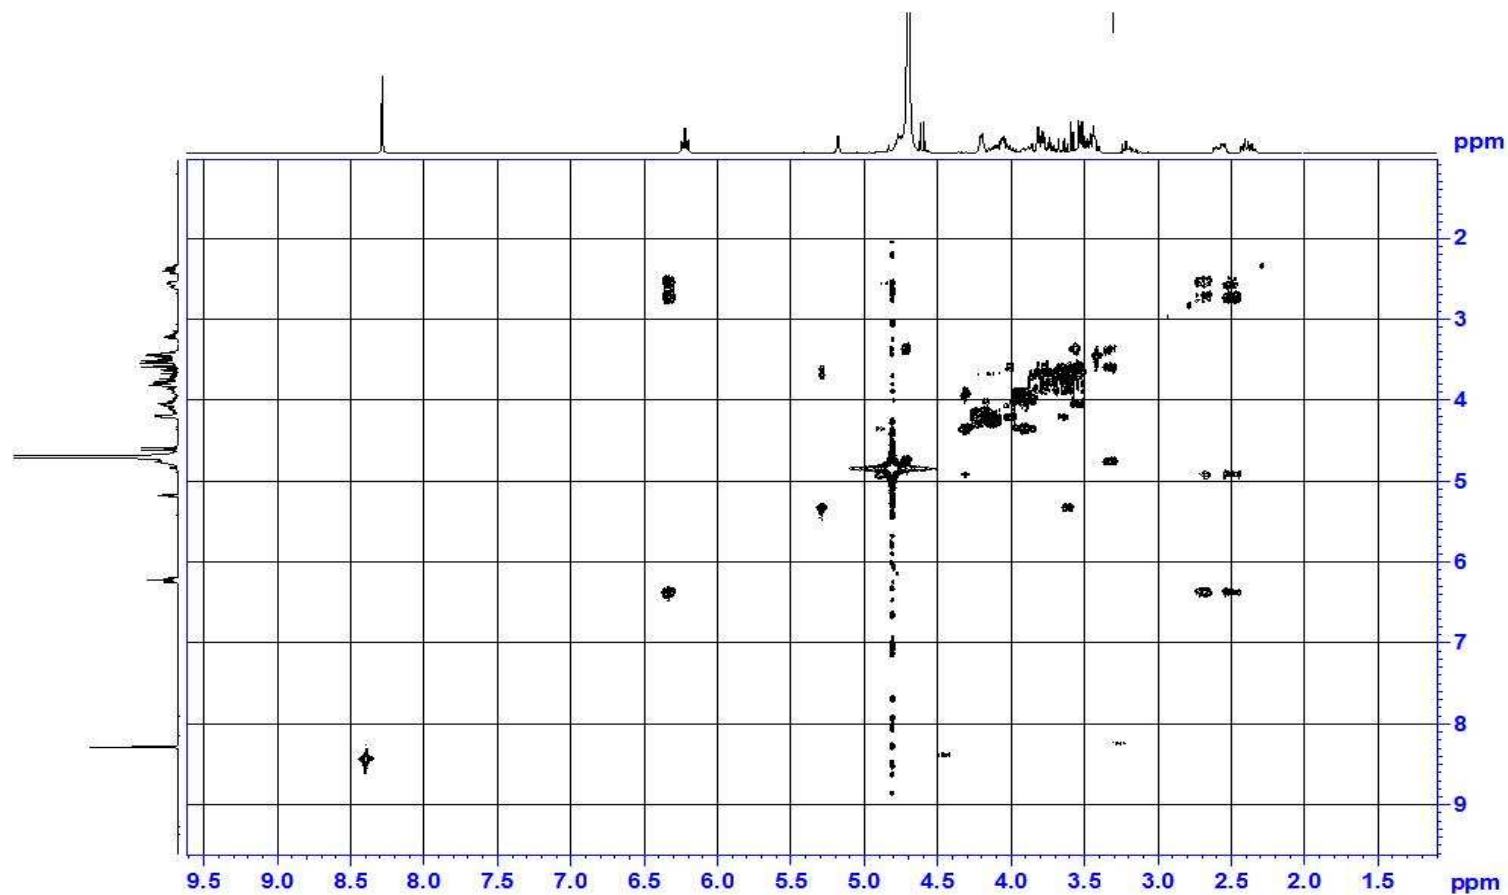

**2',3'-Dideoxyinosine 5'-( $\alpha/\beta$ -D-glucopyranos-6-yl) phosphate (10e)**

<sup>1</sup>H-RMN (D<sub>2</sub>O, 400 MHz)

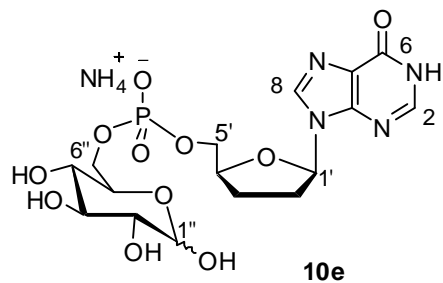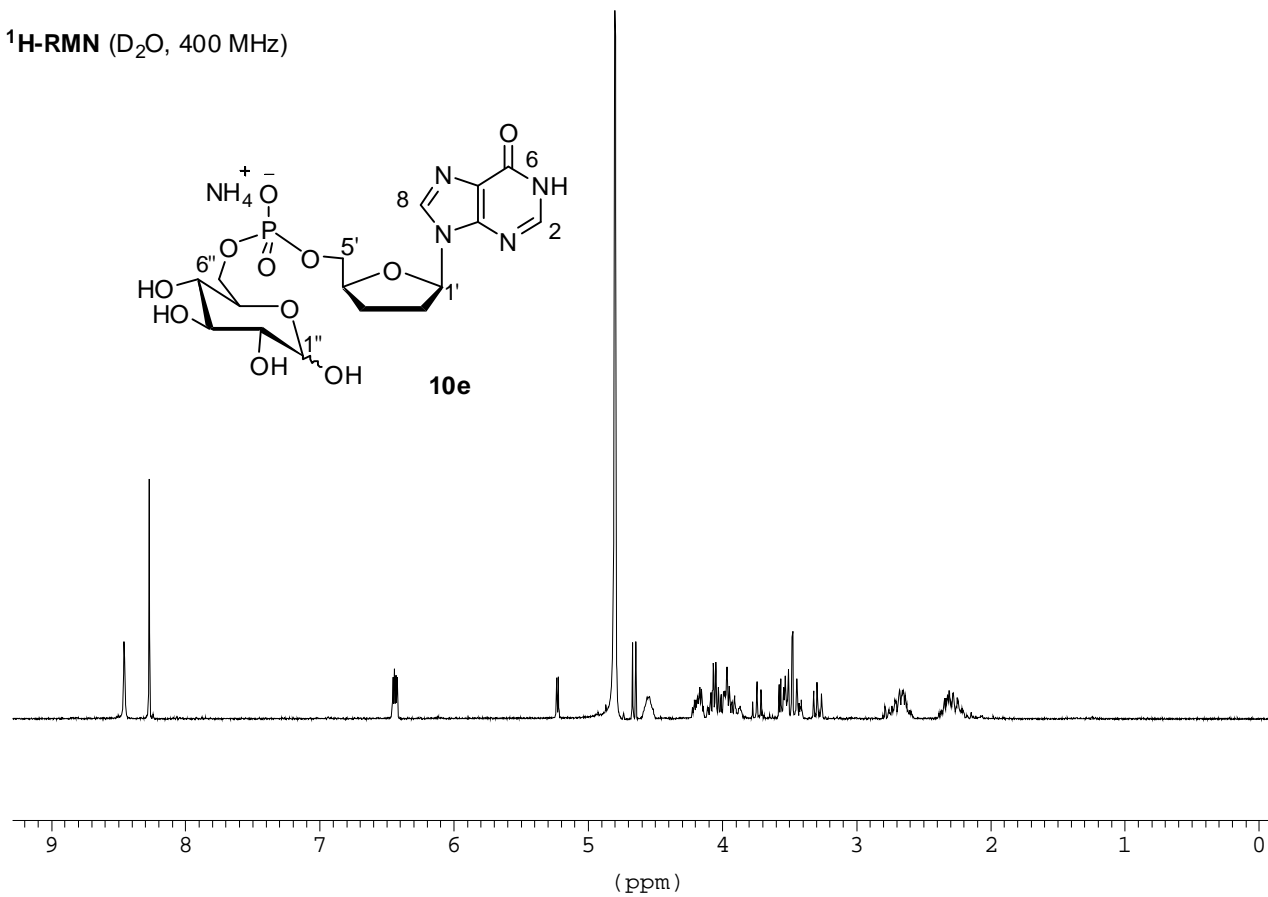

**2',3'-Dideoxyinosine 5'-( $\alpha/\beta$ -D-glucopyranos-6-yl) phosphate (10e)**

$^{13}\text{C}$ -RMN ( $\text{D}_2\text{O}$ , 100.6 MHz)

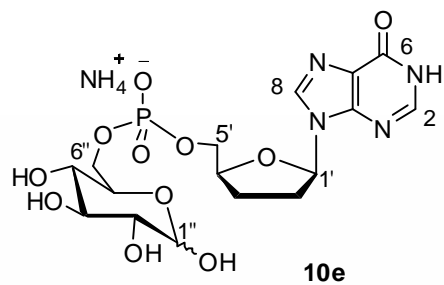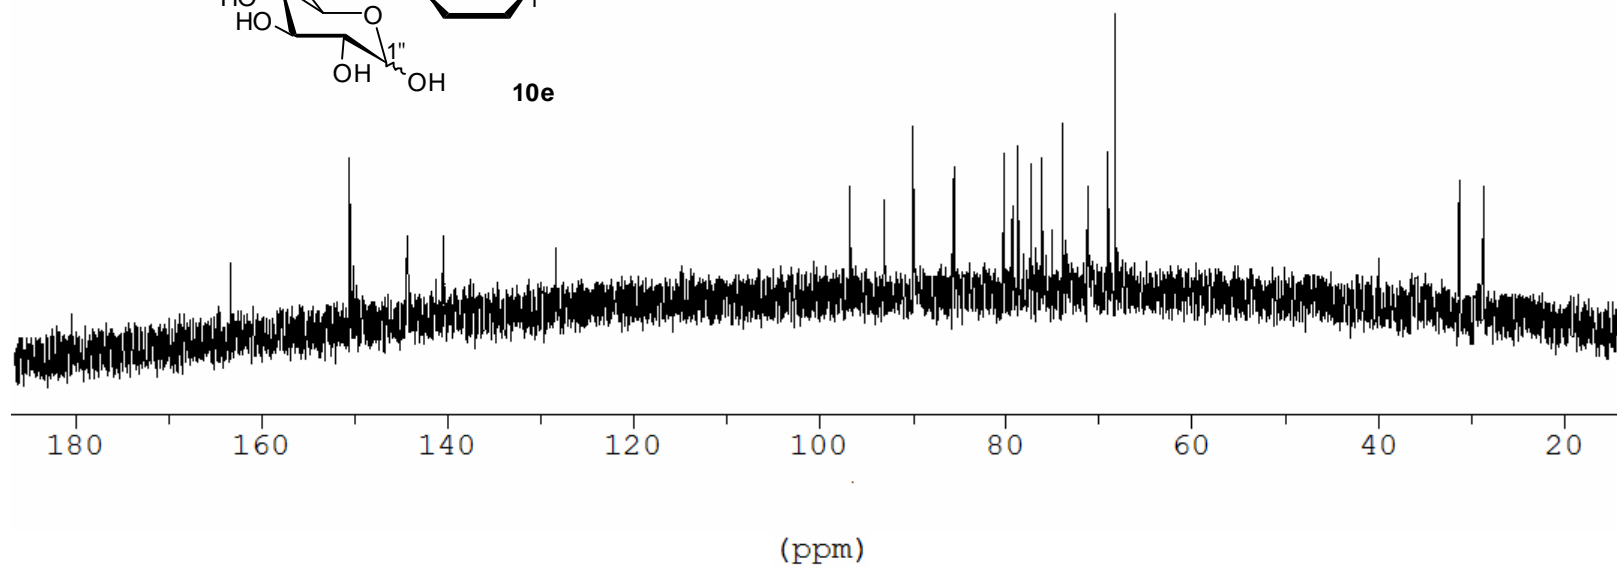

**2',3'-Dideoxyinosine 5'-( $\alpha/\beta$ -D-glucopyranos-6-yl) phosphate (10e)**

DEPT (D<sub>2</sub>O, 100.6 MHz)

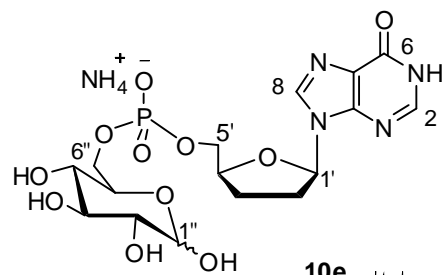

10e

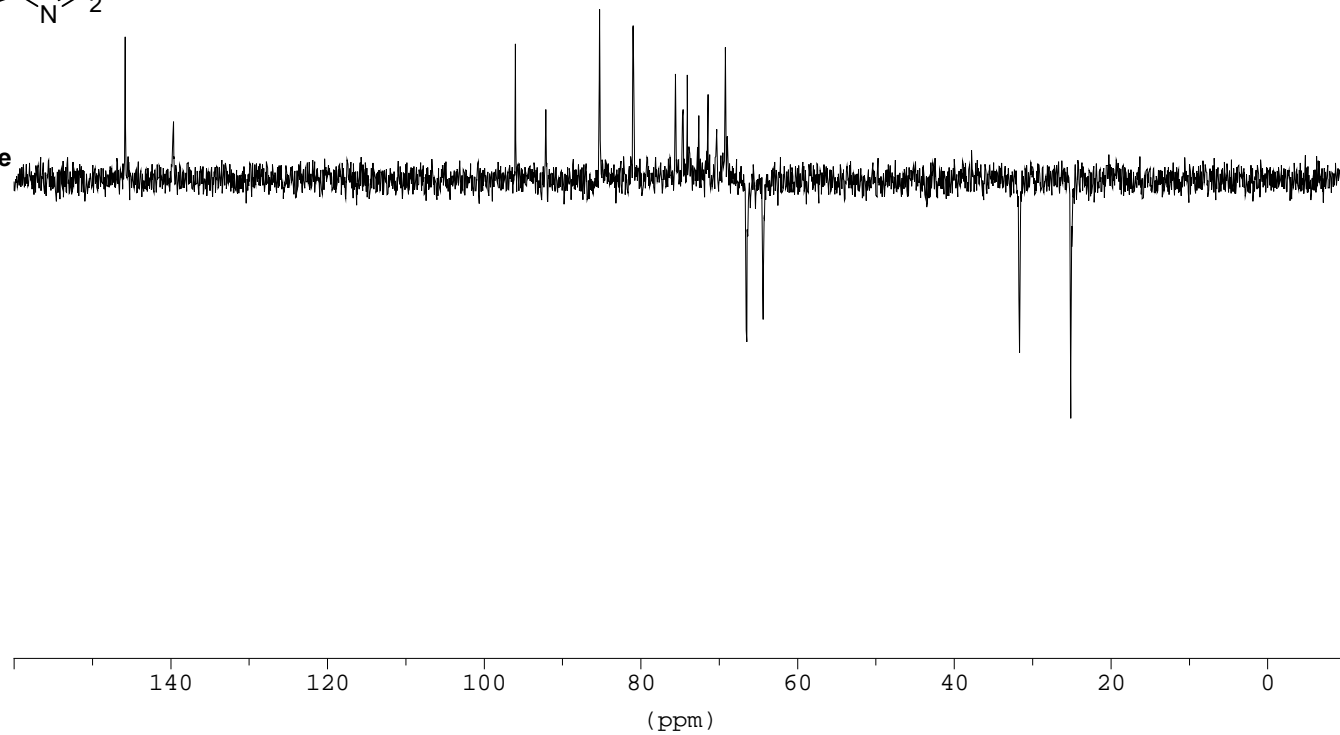

**2',3'-Dideoxyinosine 5'-( $\alpha/\beta$ -D-glucopyranos-6-yl) phosphate (10e)**

$^{31}\text{P}$ -RMN ( $\text{D}_2\text{O}$ , 161.9 MHz)

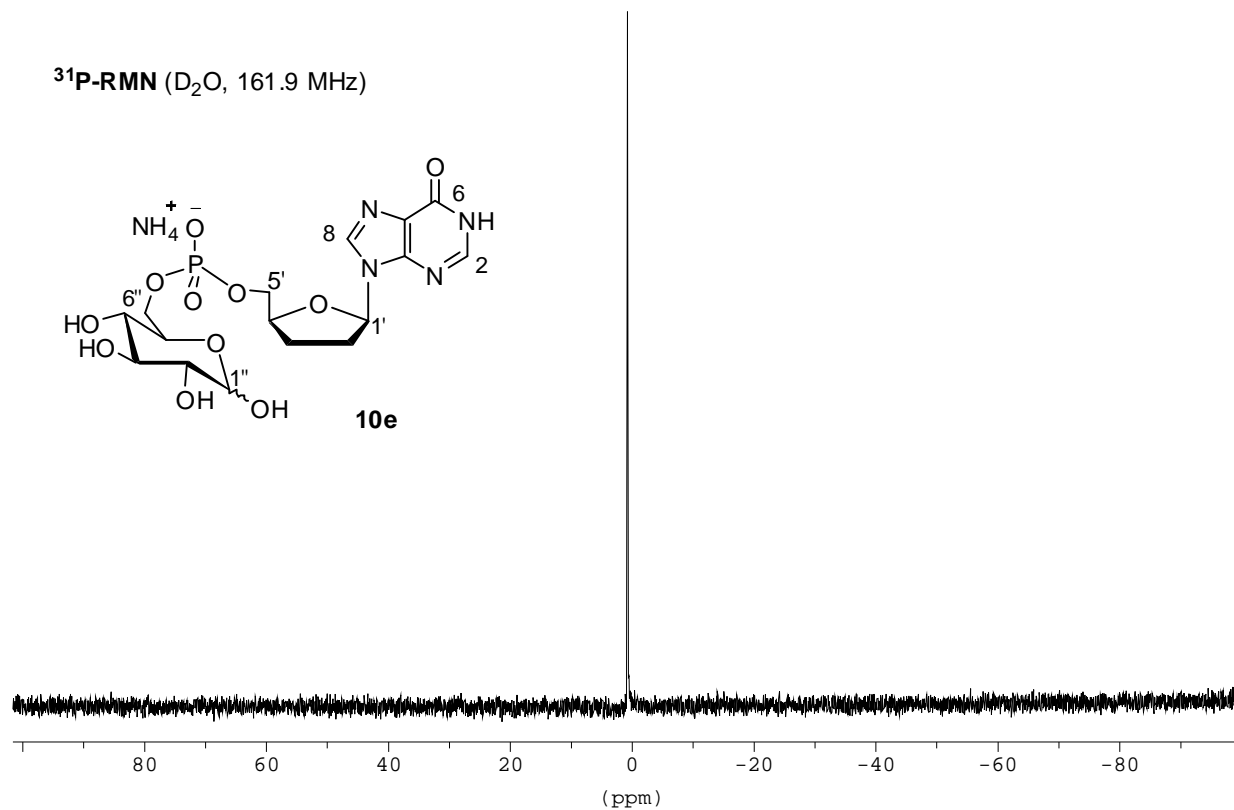



2',3'-Dideoxyinosine 5'-( $\alpha/\beta$ -D-glucopyranos-6-yl) phosphate (10e)

COSY (D<sub>2</sub>O, 400 MHz)

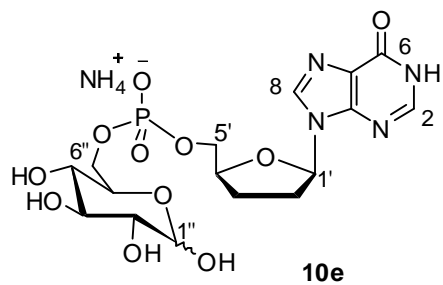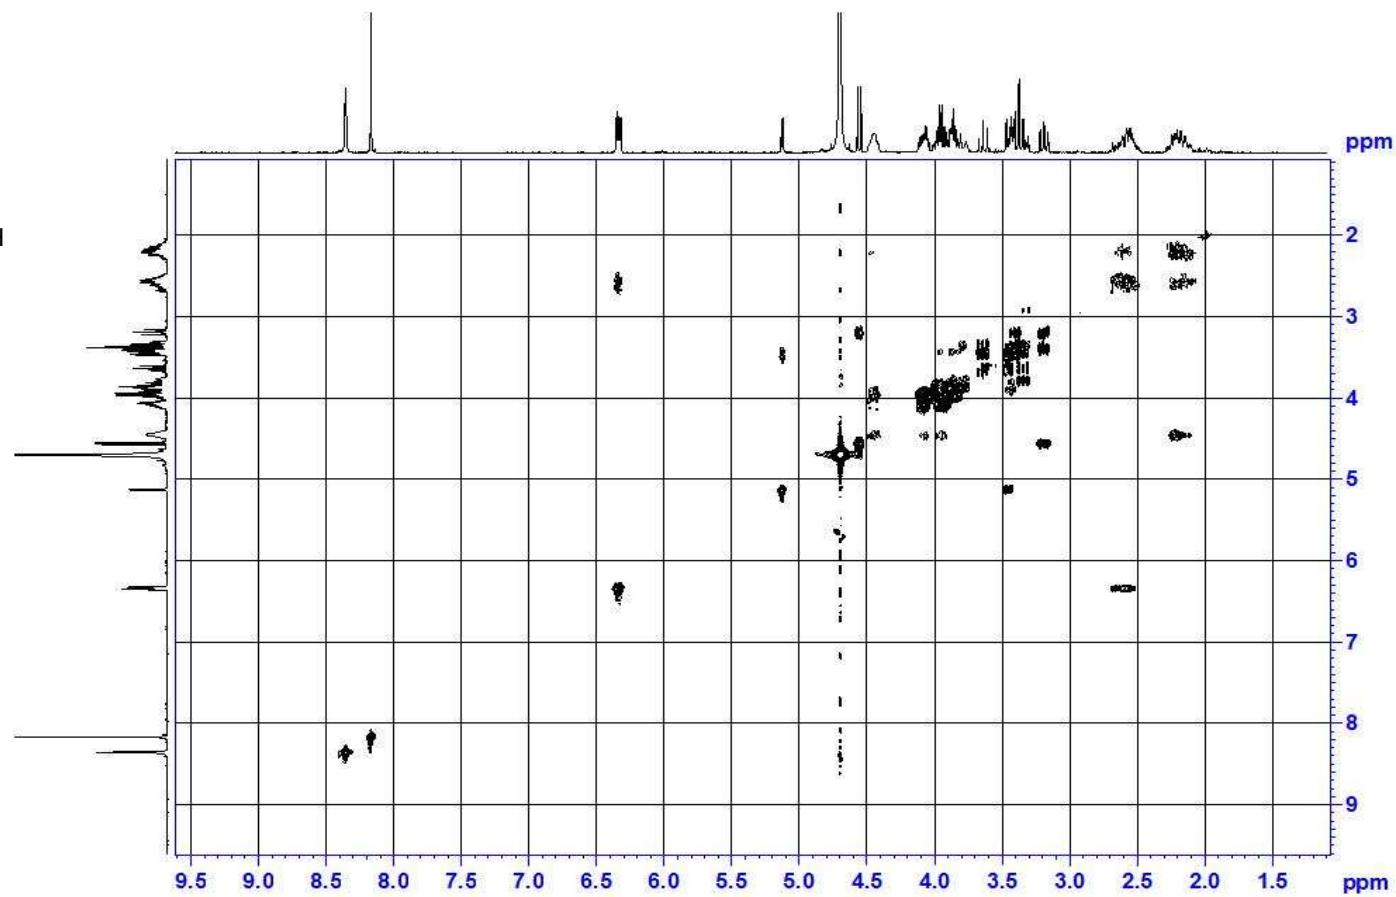

**2',3'-Dideoxyadenosine 5'-( $\alpha/\beta$ -D-glucopyranos-6-yl) phosphate (10f)**

**$^1\text{H-RMN}$**  ( $\text{D}_2\text{O}$ , 600 MHz)

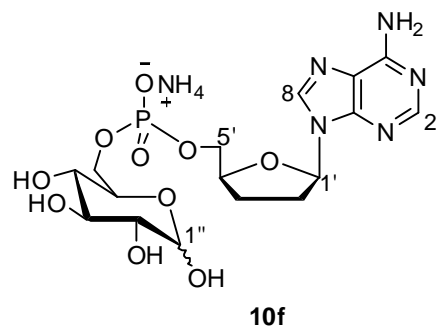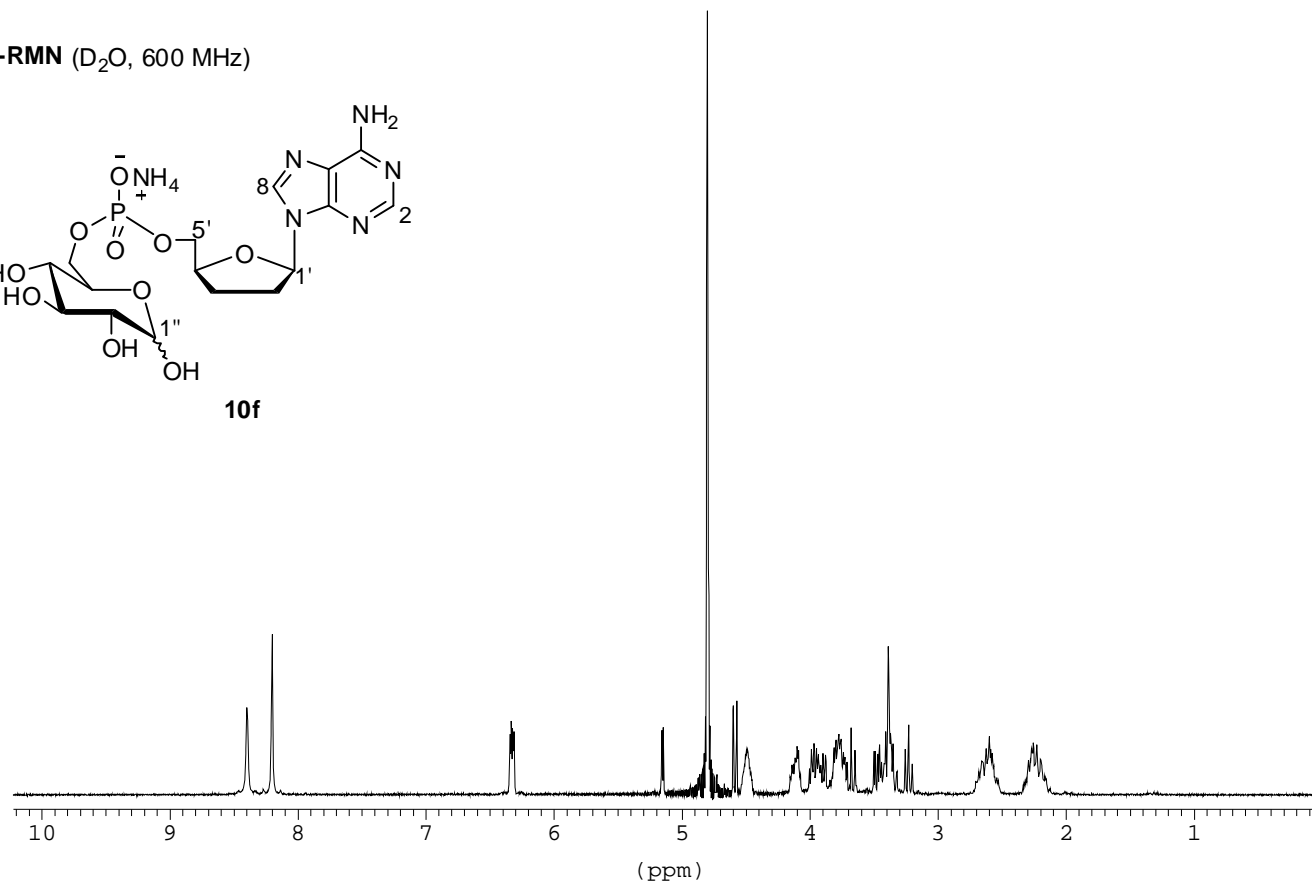

**2',3'-Dideoxyadenosine 5'-( $\alpha/\beta$ -D-glucopyranos-6-yl) phosphate (10f)**

$^{13}\text{C}$ -RMN ( $\text{D}_2\text{O}$ , 150.5 MHz)

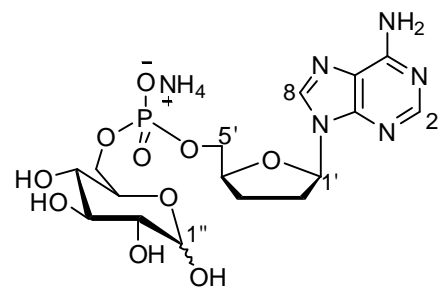

**10f**

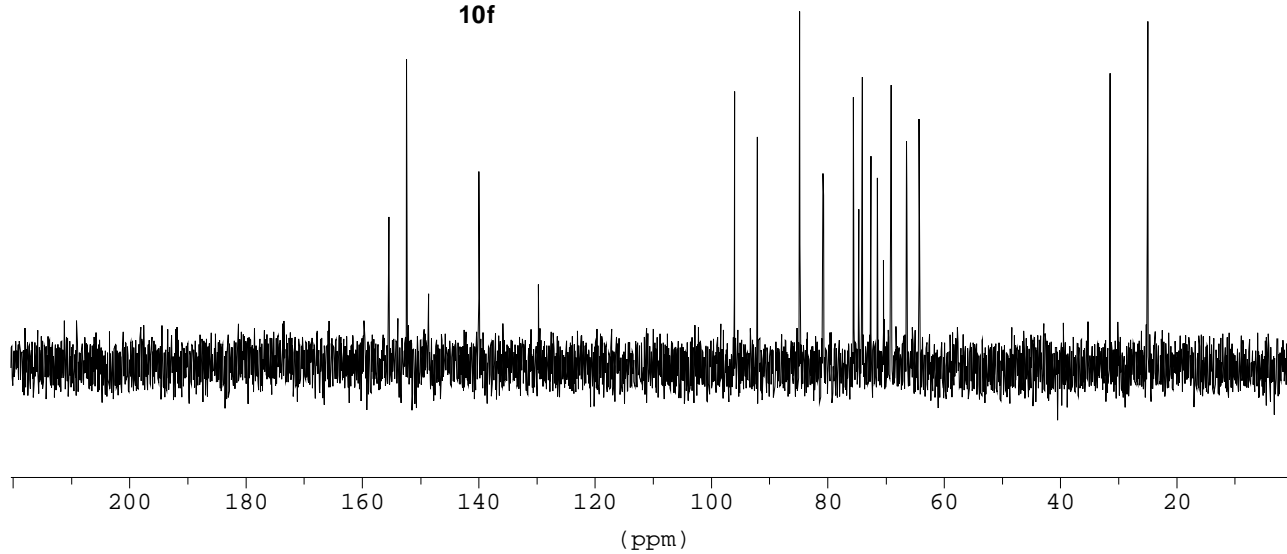

**2',3'-Dideoxyadenosine 5'-( $\alpha/\beta$ -D-glucopyranos-6-yl) phosphate (10f)**  
DEPT ( $D_2O$ , 150.5 MHz)

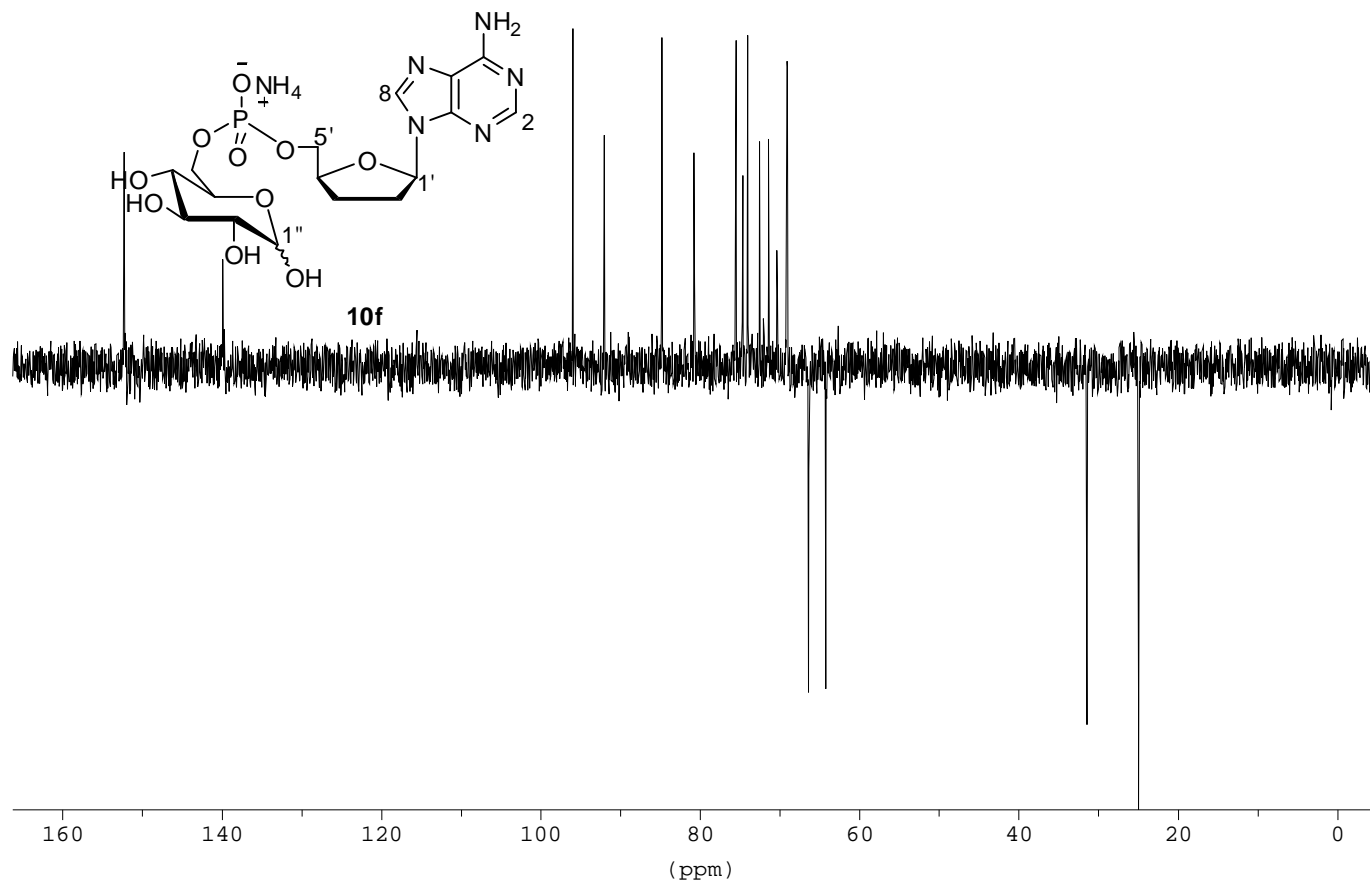

**2',3'-Dideoxyadenosine 5'-( $\alpha/\beta$ -D-glucopyranos-6-yl) phosphate (10f)**

<sup>31</sup>P-RMN (D<sub>2</sub>O, 242.9 MHz)

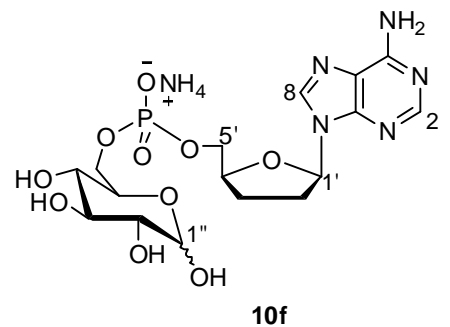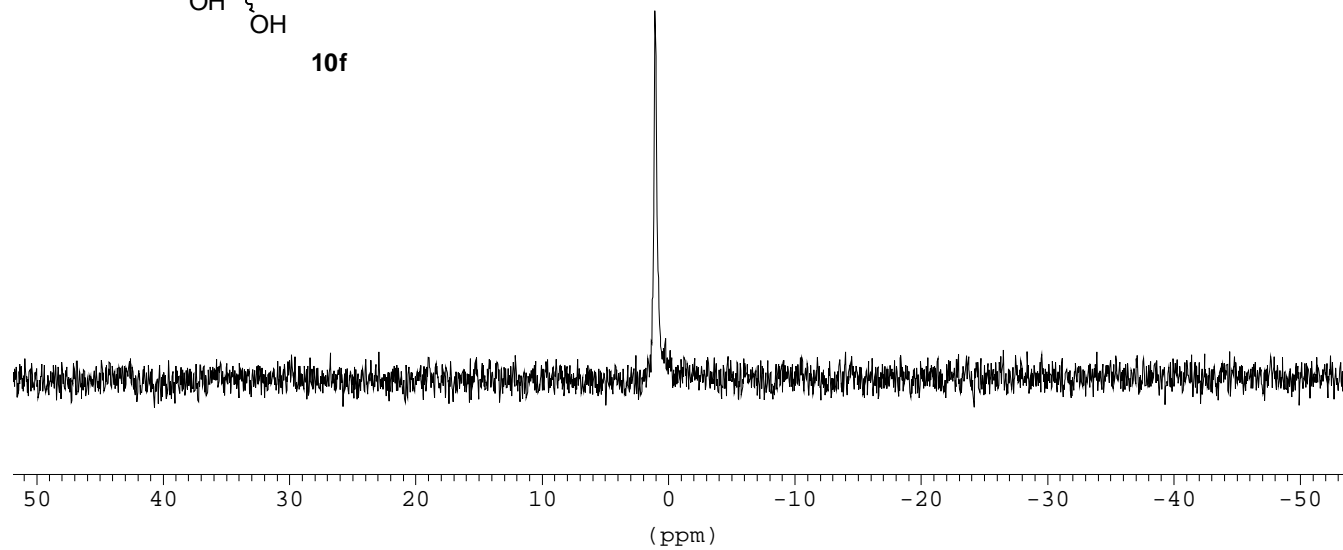

2',3'-Dideoxyadenosine 5'-( $\alpha/\beta$ -D-glucopyranos-6-yl) phosphate (10f)

COSY (D<sub>2</sub>O, 600 MHz)

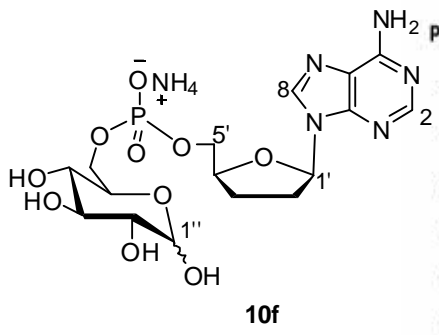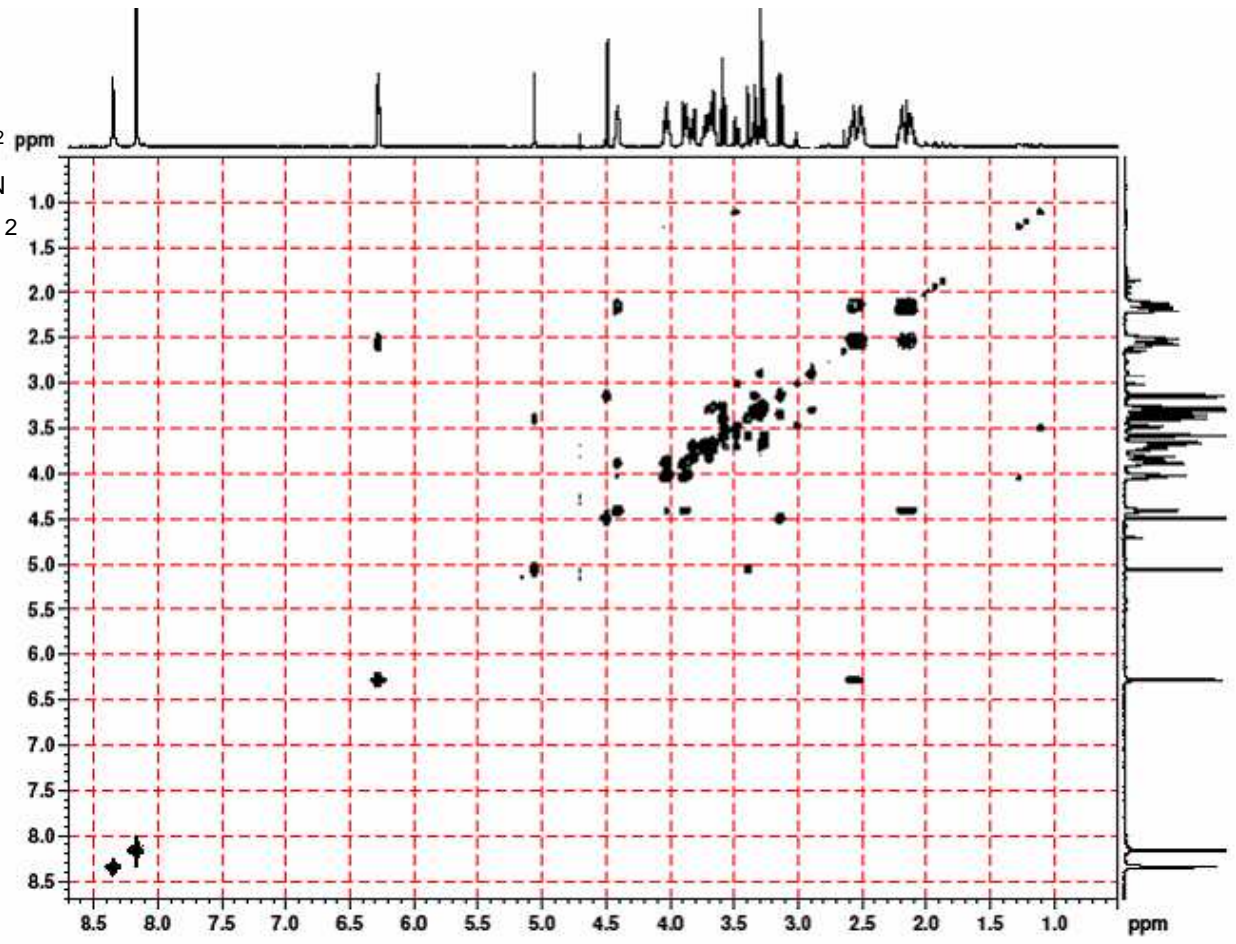

**1'-(3-Carbamoyl-1,2,4-triazoyl)- $\beta$ -D-ribofuranose 5'-( $\alpha/\beta$ -D-glucopyranos-6-yl) phosphate (10g)**

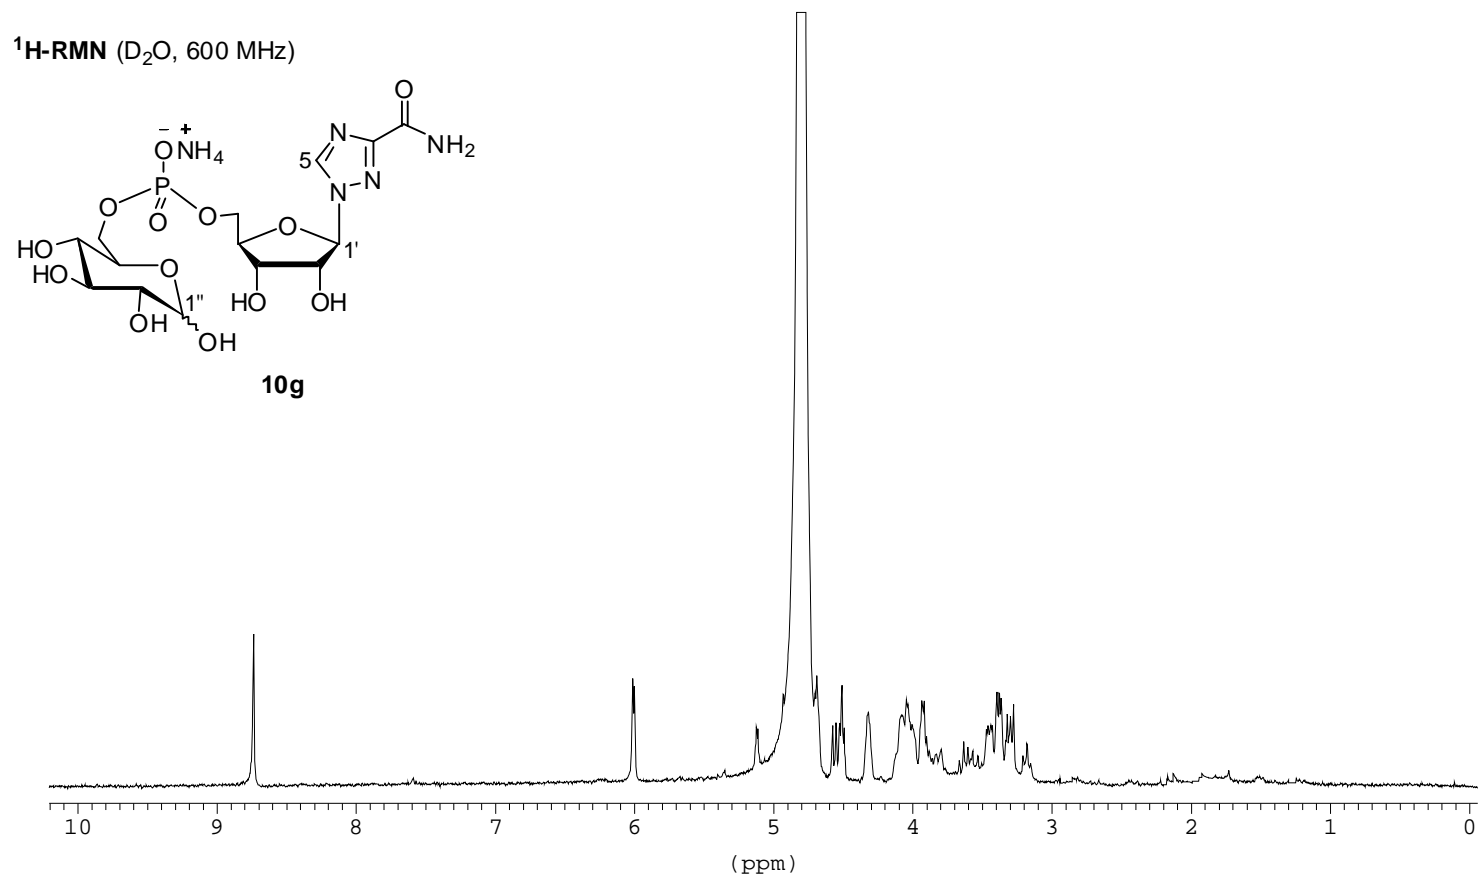

**1'-(3-Carbamoyl-1,2,4-triazoyl)- $\beta$ -D-ribofuranose 5'-( $\alpha/\beta$ -D-glucopyranos-6-yl) phosphate (10g)**

$^{13}\text{C}$ -RMN ( $\text{D}_2\text{O}$ , 150.5 MHz)

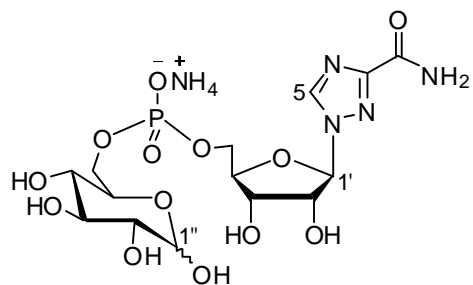

**10g**

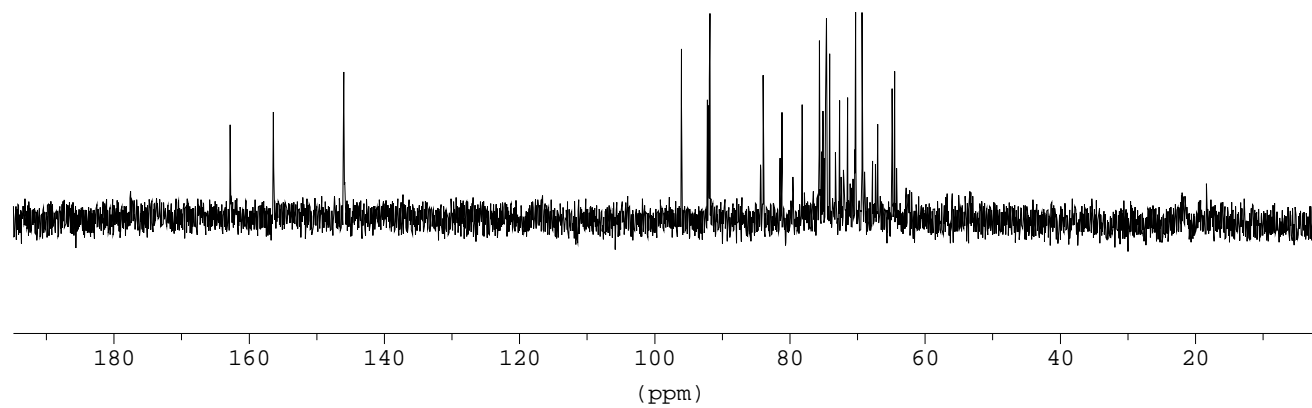



**1'-(3-Carbamoyl-1,2,4-triazoyl)-β-D-ribofuranose 5'-(α/β-D-glucopyranos-6-yl) phosphate (10g)**

DEPT (D<sub>2</sub>O, 150.5 MHz)

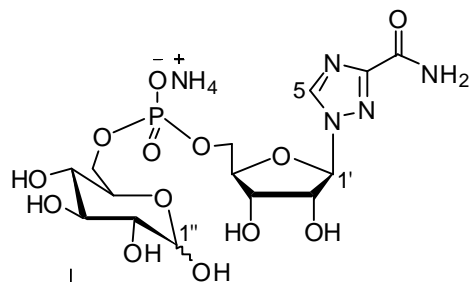

10g

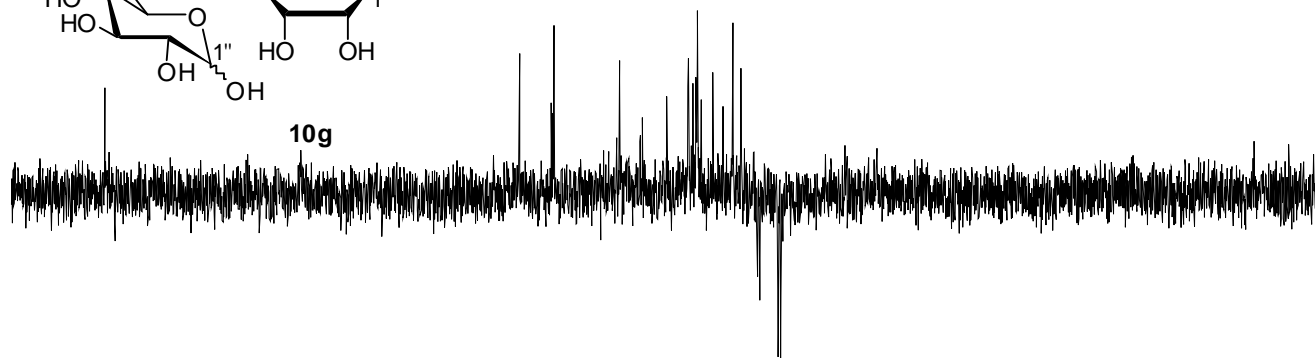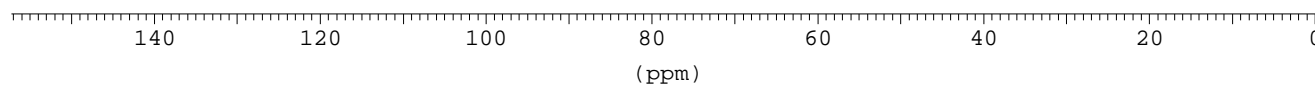

**1'-(3-Carbamoyl-1,2,4-triazoyl)- $\beta$ -D-ribofuranose 5'-( $\alpha/\beta$ -D-glucopyranos-6-yl) phosphate (10g)**

$^{31}\text{P}$ -RMN ( $\text{D}_2\text{O}$ , 242.9 MHz)

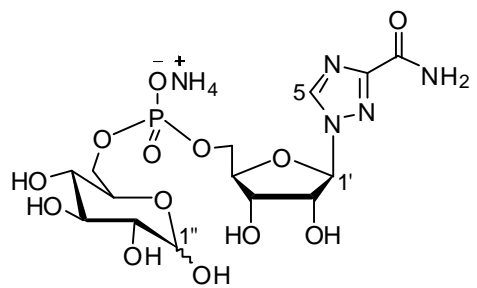

**10g**

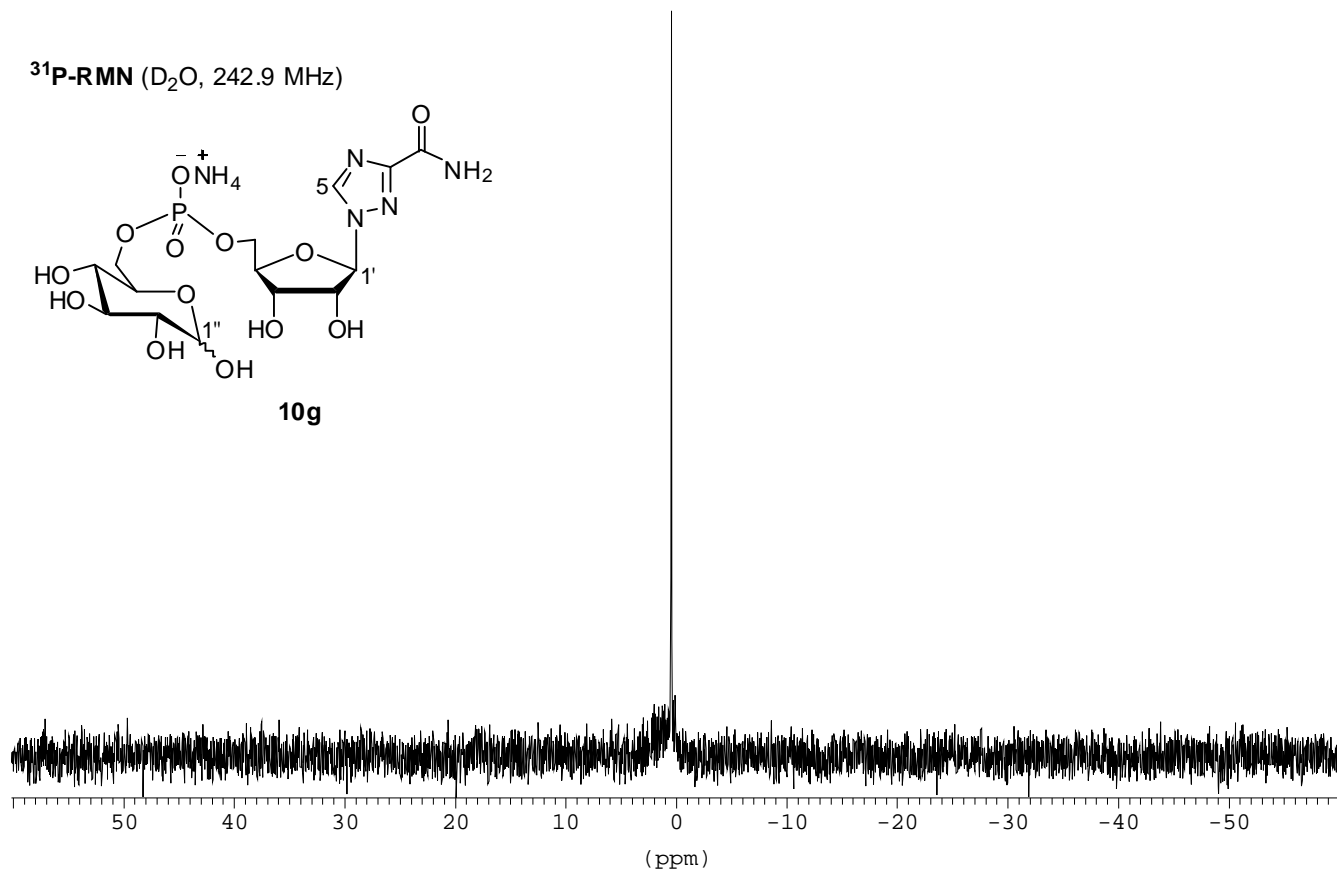

**1'-Adeniny-β-D-arabinofuranose 5'-(α/β-D-glucopyranos-6-yl) phosphate (10h)**

<sup>1</sup>H-RMN (D<sub>2</sub>O, 600 MHz)

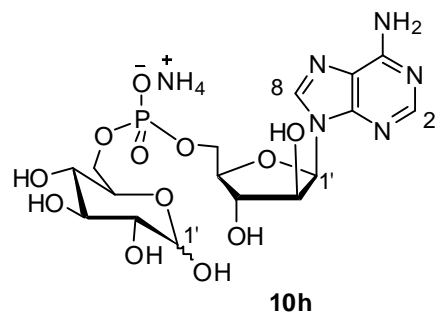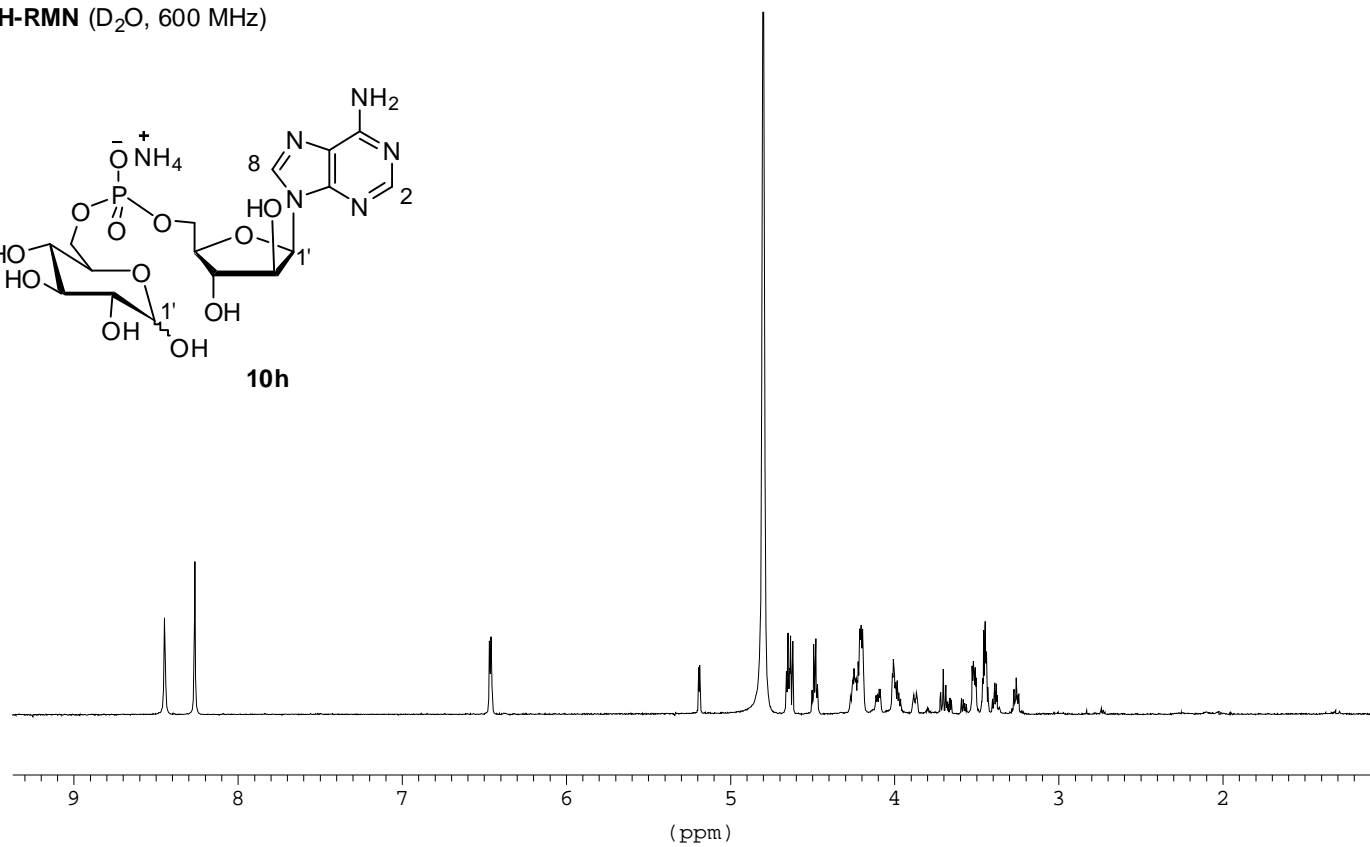

**1'-AdeninyI-β-D-arabinofuranose 5'-(α/β-D-glucopyranos-6-yl) phosphate (10h)**

<sup>13</sup>C-RMN (D<sub>2</sub>O, 150.5 MHz)

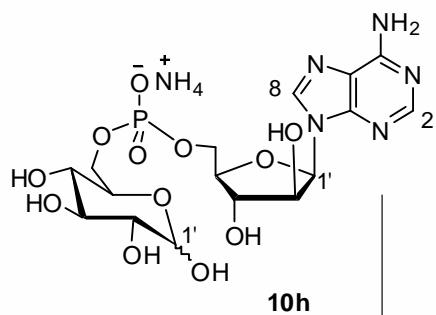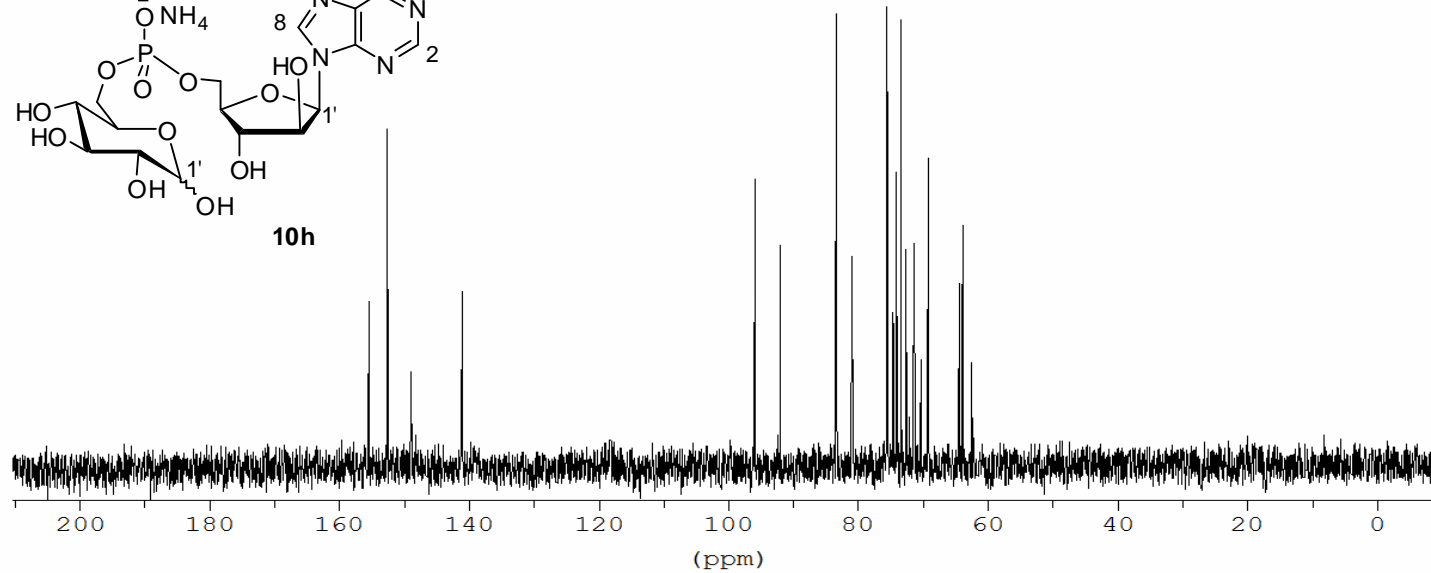

**1'-Adeniny-β-D-arabinofuranose 5'-(α/β-D-glucopyranos-6-yl) phosphate (10h)**

DEPT (D<sub>2</sub>O, 150.5 MHz)

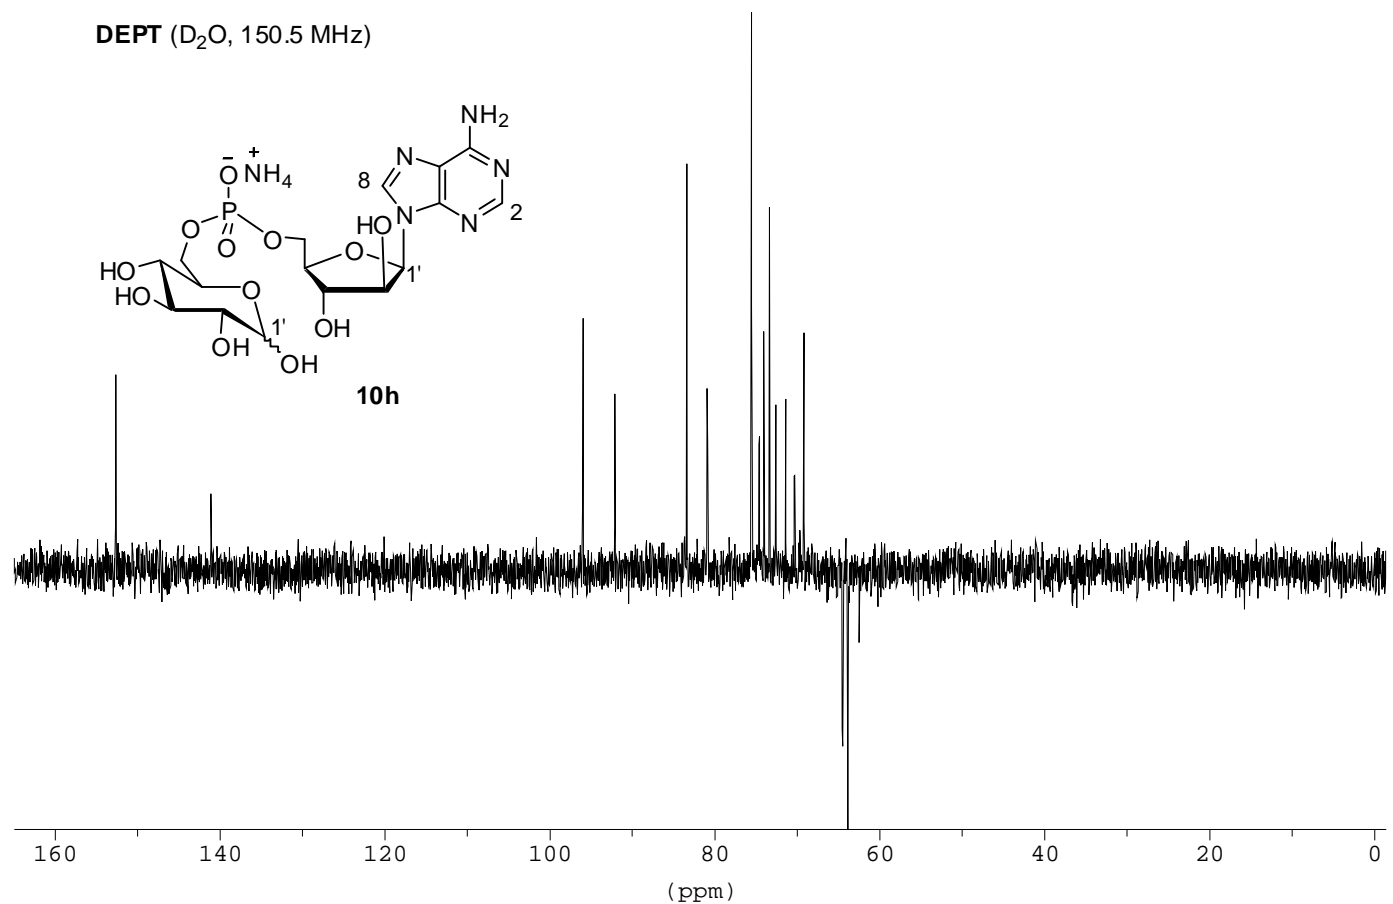

**1'-Adeniny-β-D-arabinofuranose 5'-(α/β-D-glucopyranos-6-yl) phosphate (10h)**

<sup>31</sup>P-RMN (D<sub>2</sub>O, 242.9 MHz)

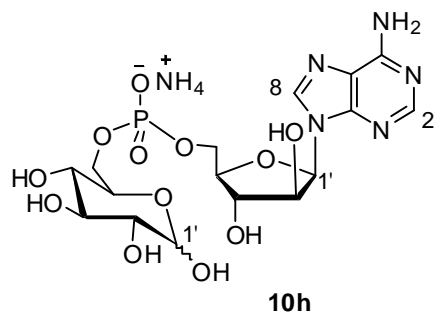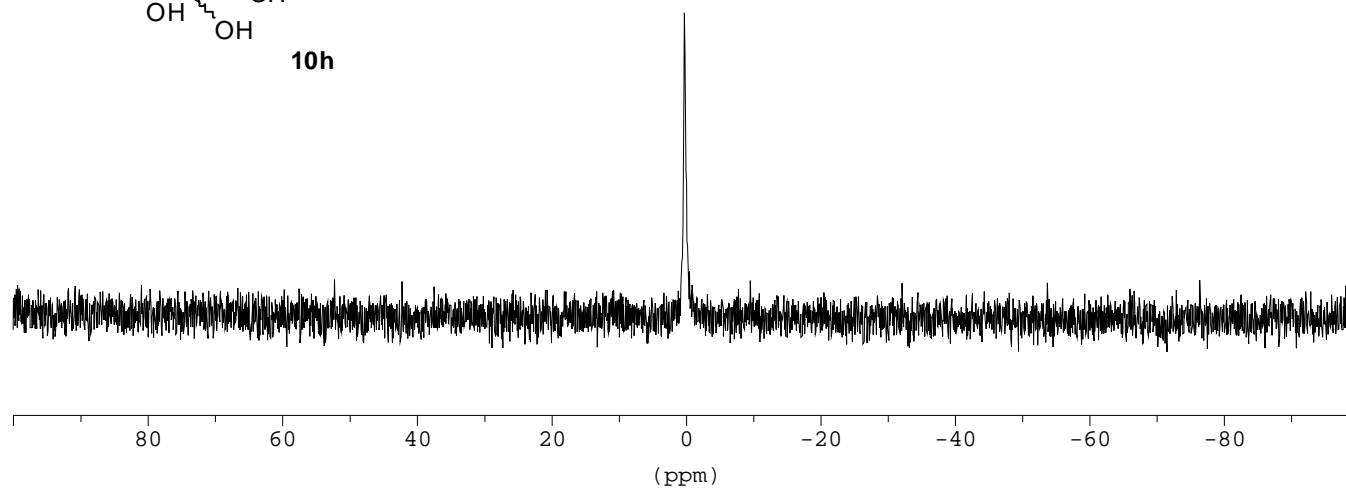

1'-Adeniny-β-D-arabinofuranose 5'-(α/β-D-glucopyranos-6-yl) phosphate (10h)

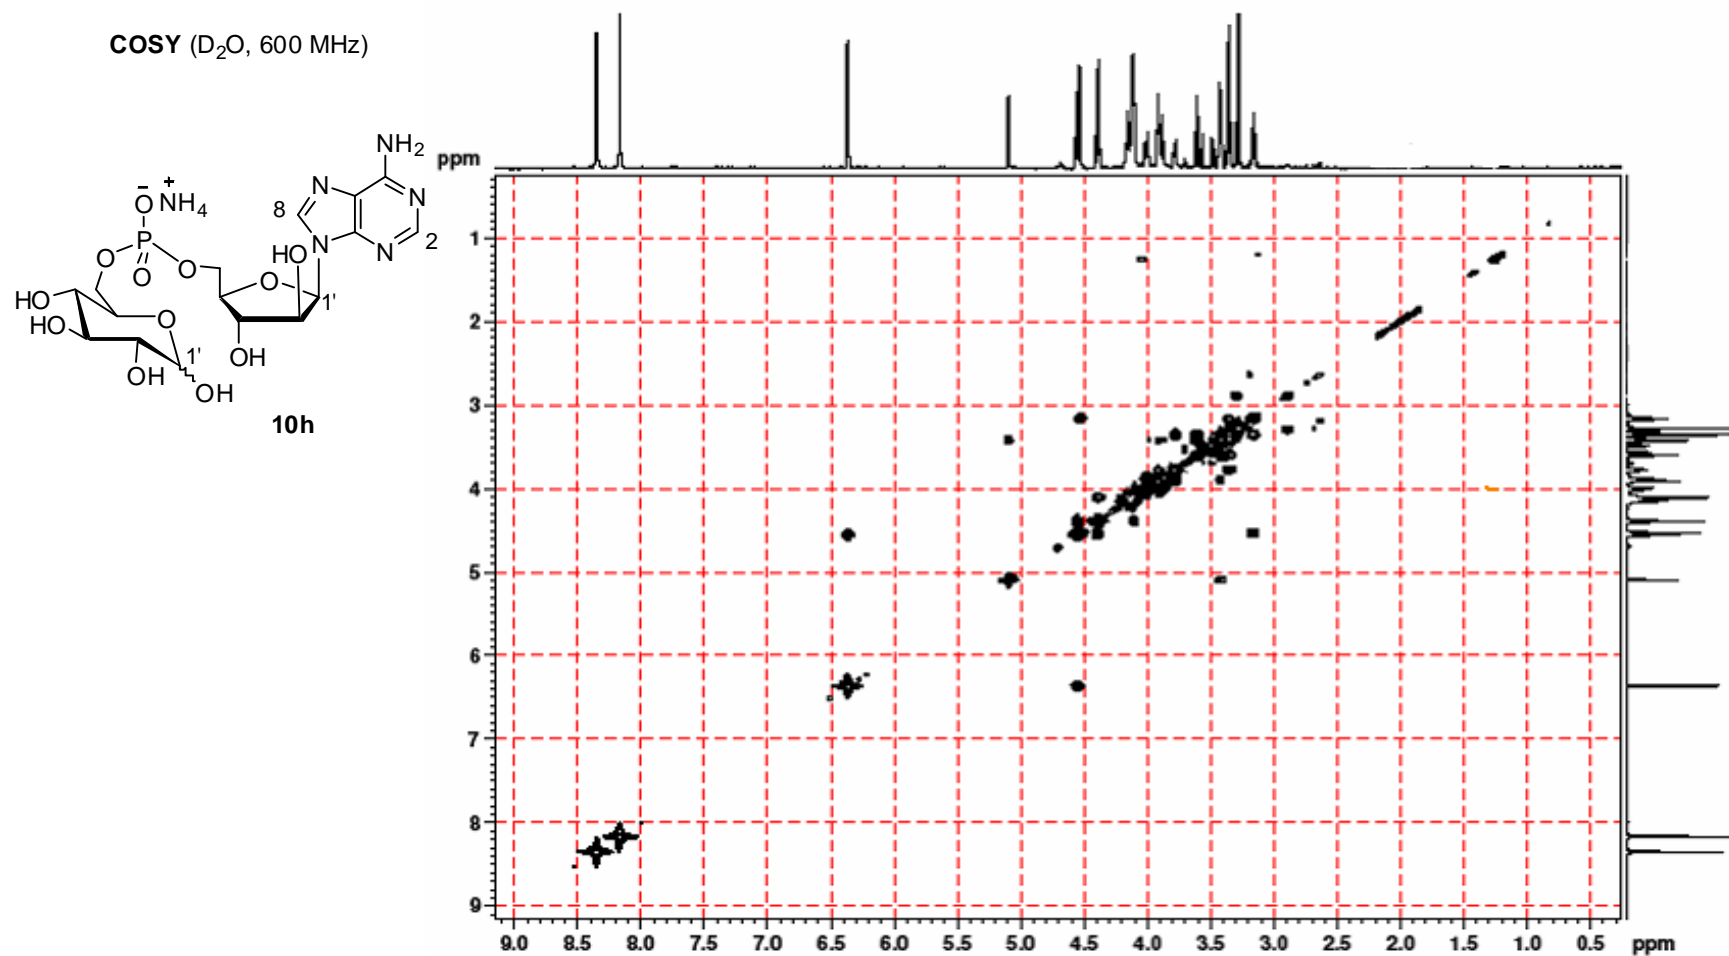

**1'-Cytosinyl-β-D-arabinofuranose 5'-(α/β-D-glucopyranos-6-yl) phosphate (10i)**

**<sup>1</sup>H-RMN** (D<sub>2</sub>O, 400 MHz)

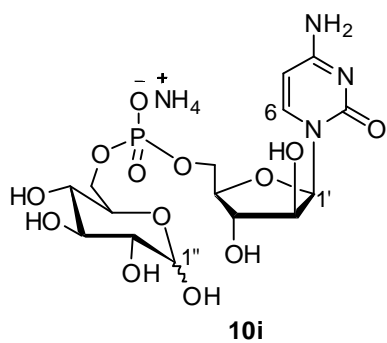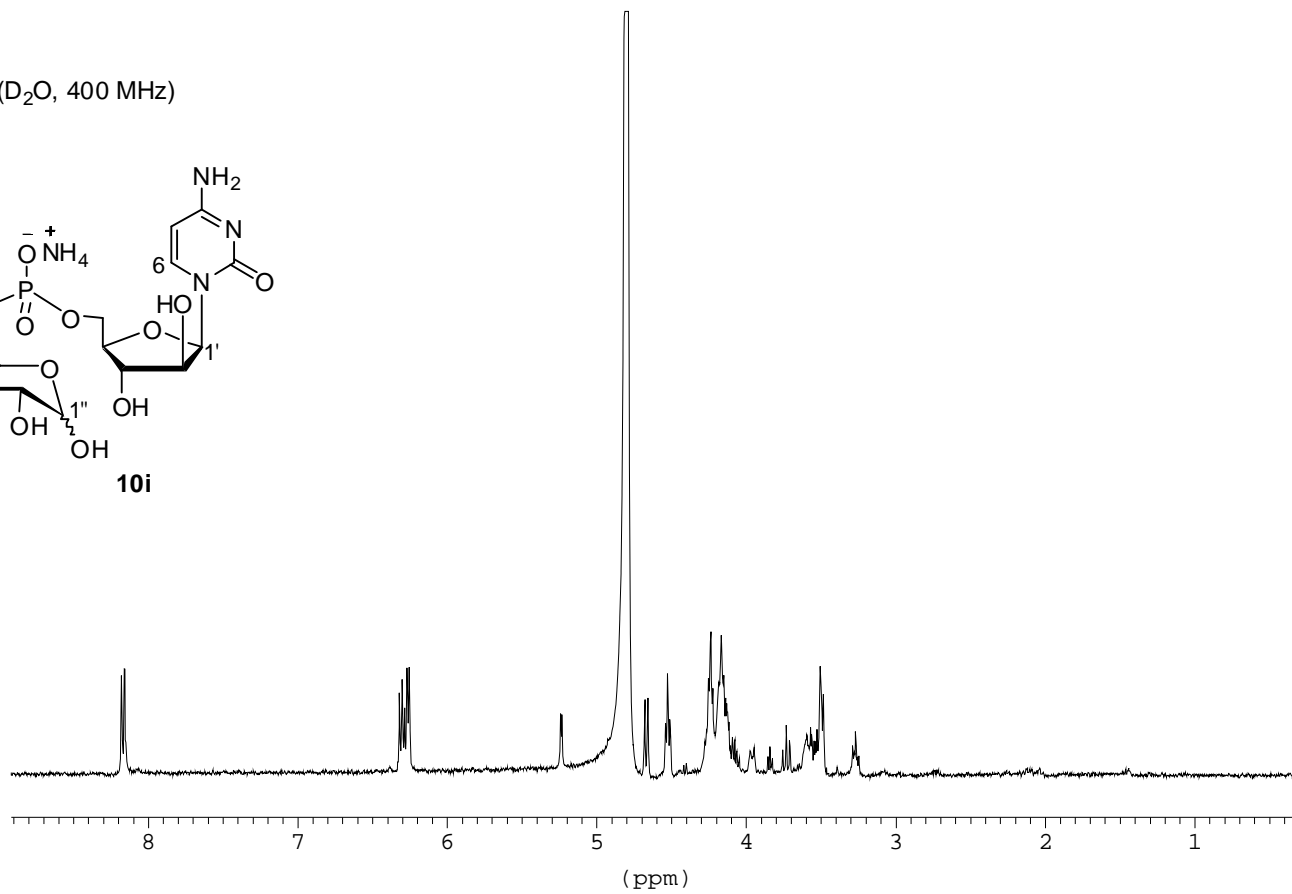



**1'-Cytosinyl-β-D-arabinofuranose 5'-(α/β-D-glucopyranos-6-yl) phosphate (10i)**

<sup>13</sup>C-RMN (D<sub>2</sub>O, 100.6 MHz)

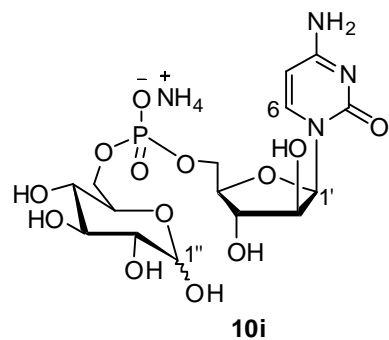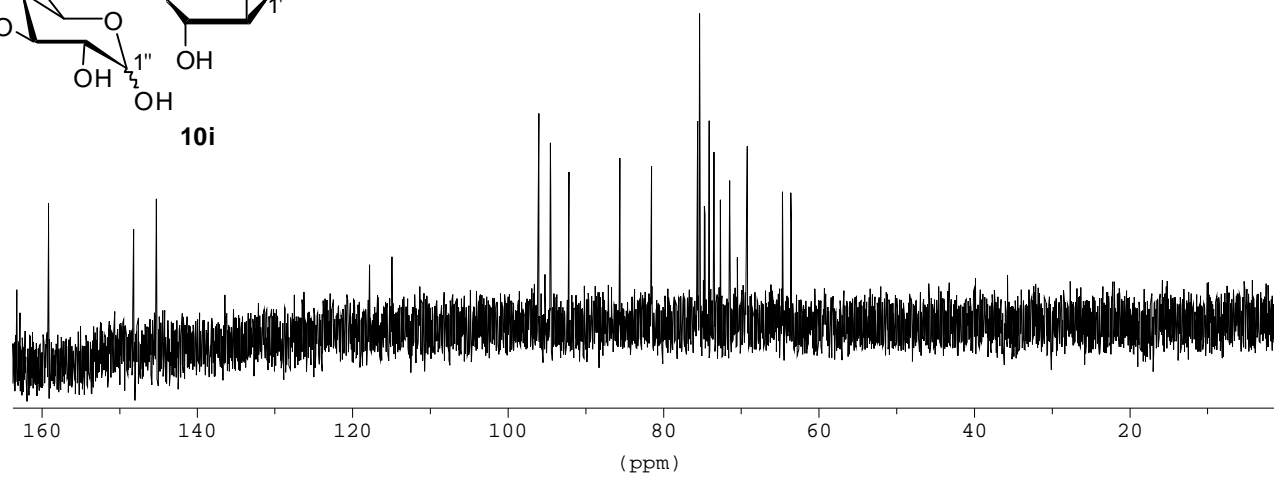

**1'-Cytosinyl-β-D-arabinofuranose 5'-(α/β-D-glucopyranos-6-yl) phosphate (10i)**

DEPT (D<sub>2</sub>O, 100.6 MHz)

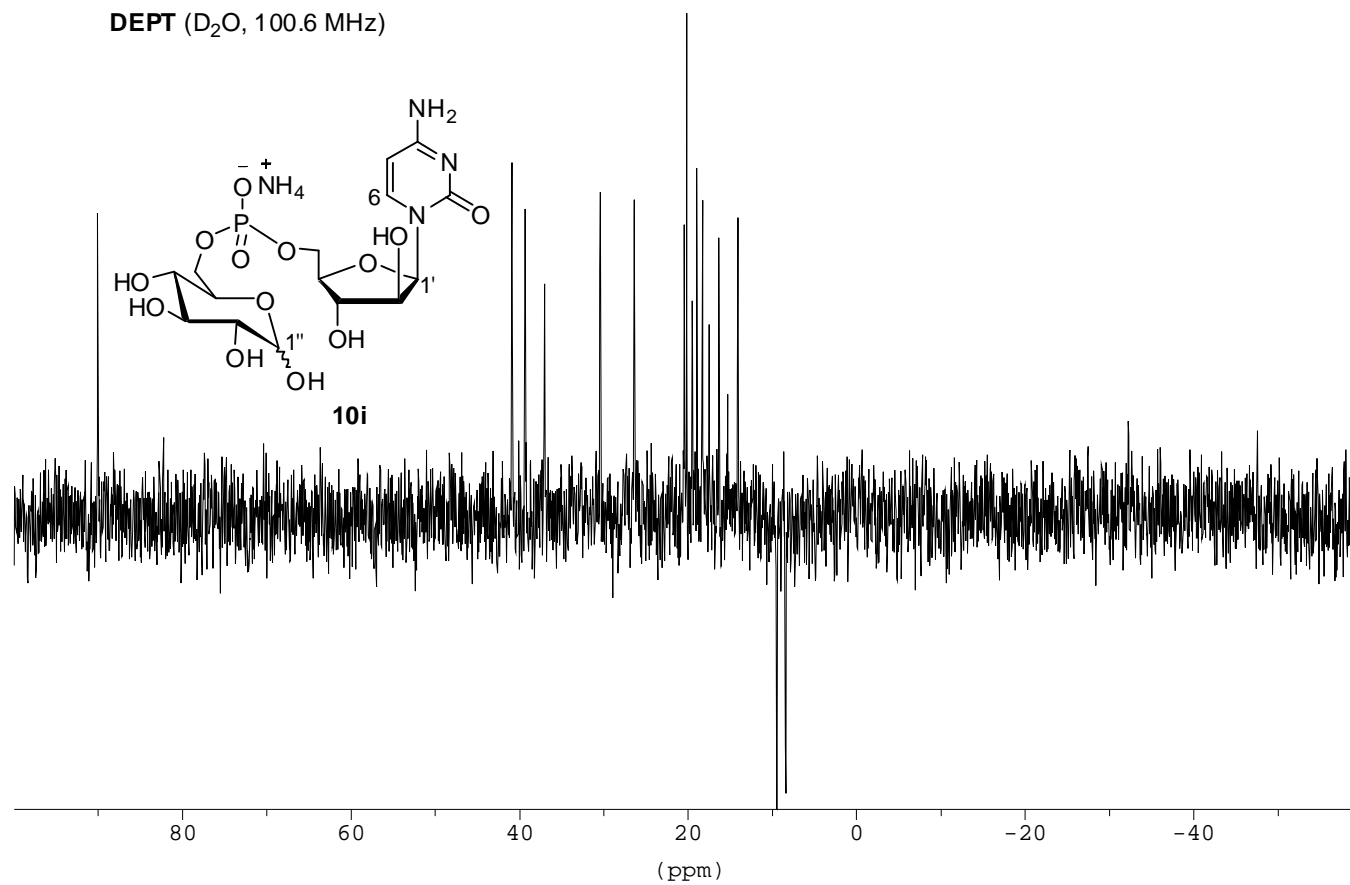

**1'-Cytosinyl-β-D-arabinofuranose 5'-(α/β-D-glucopyranos-6-yl) phosphate (10i)**

<sup>31</sup>P-RMN (D<sub>2</sub>O, 161.9 MHz)

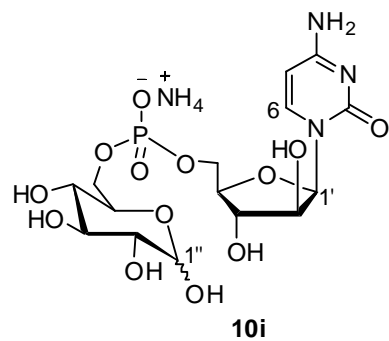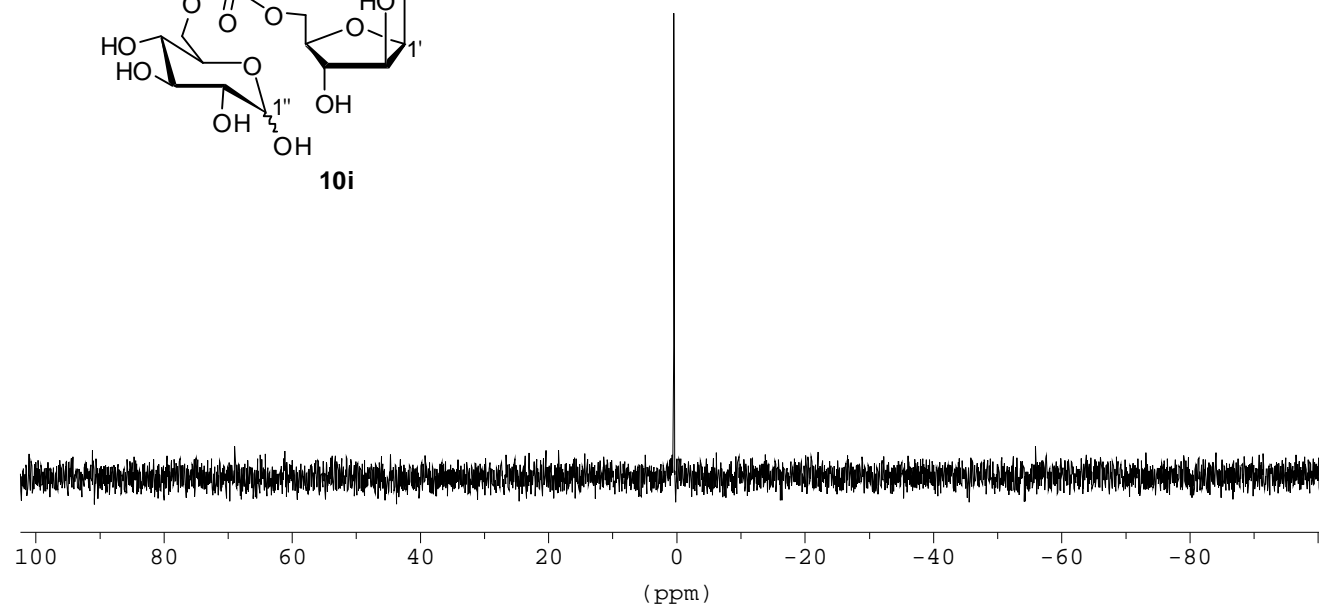

1'-Cytosinyl-β-D-arabinofuranose 5'-(α/β-D-glucopyranos-6-yl) phosphate (10i)

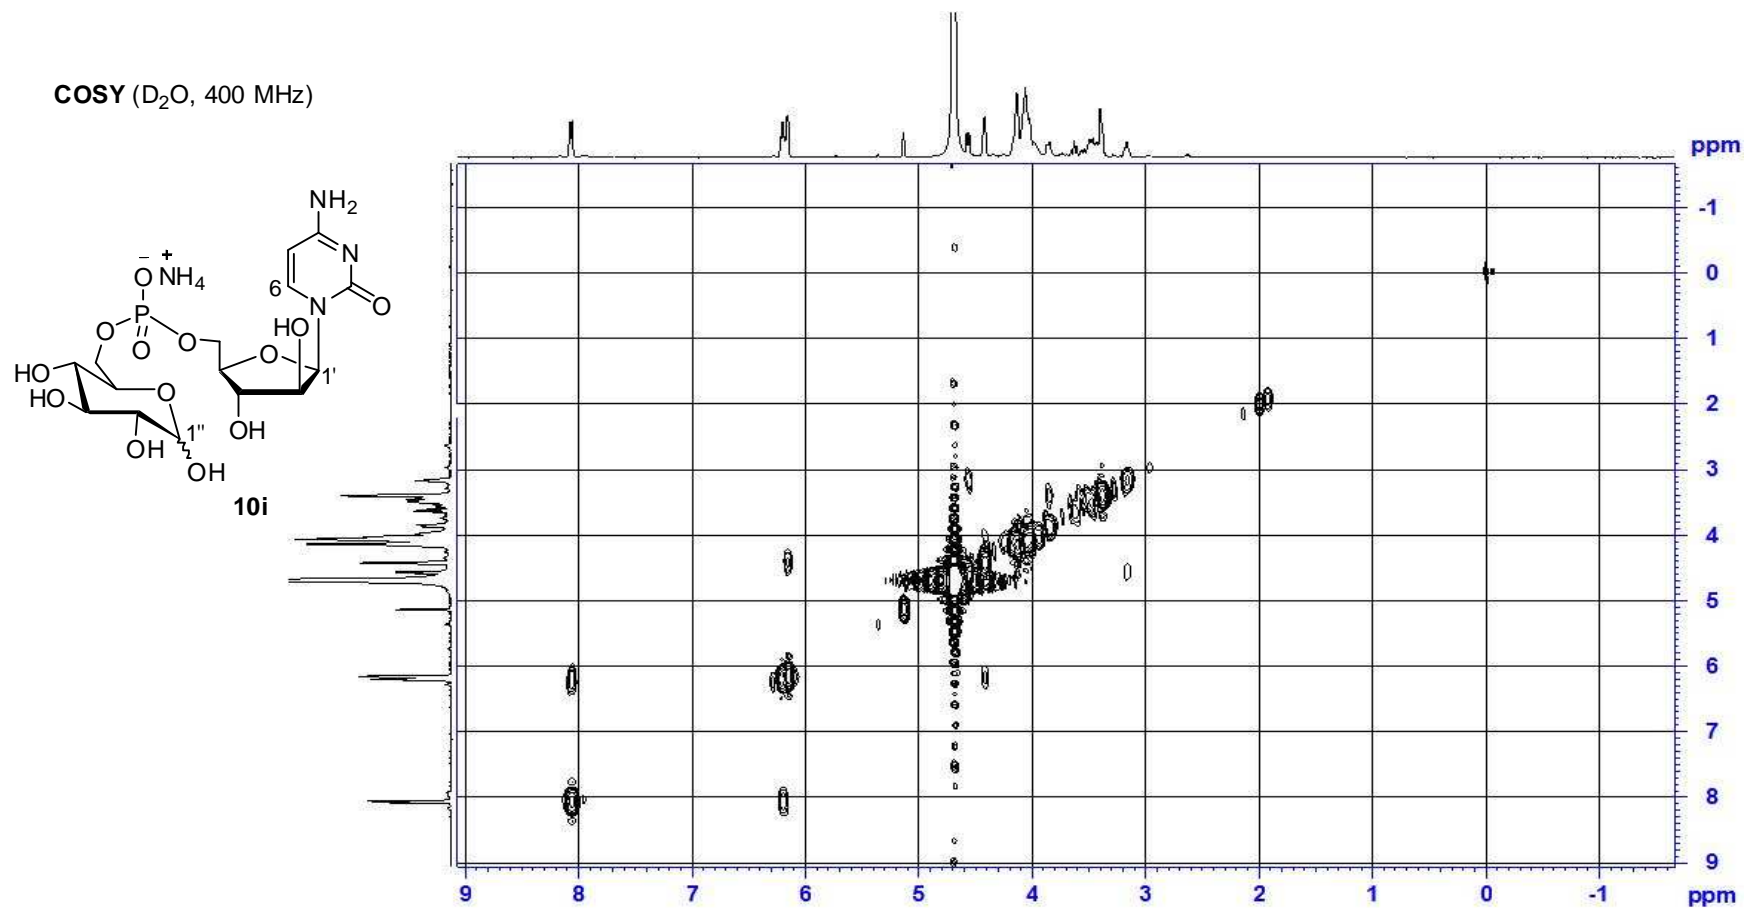

**1-(5'-*O*-dimethoxytrityl- $\beta$ -D-ribofuranosyl)-1,2,4-triazole-3-carboxamide (14)**

**$^1\text{H-RMN}$**  (MeOH- $d_4$ , 300 MHz)

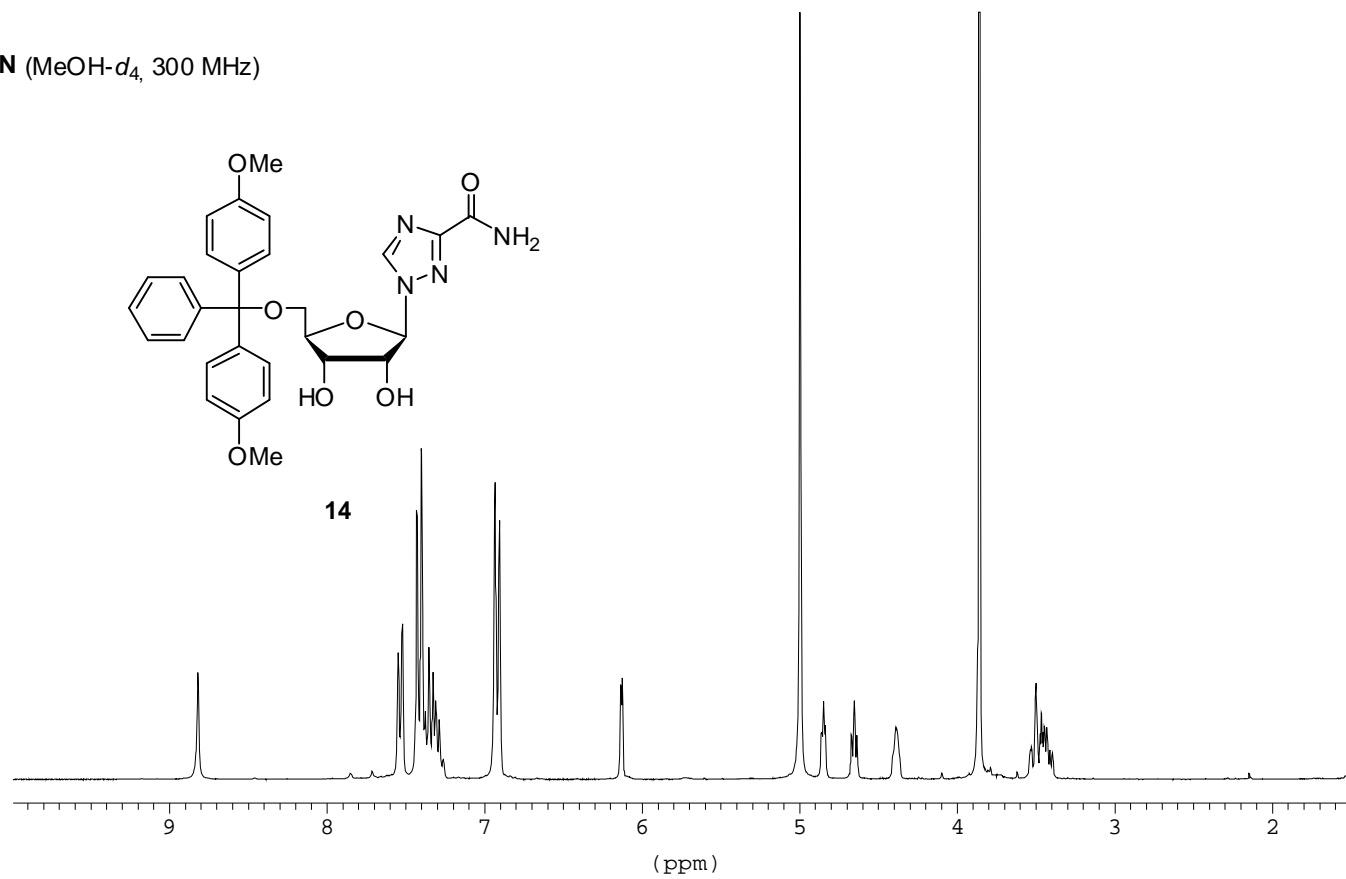

**1-(5'-*O*-dimethoxytrityl- $\beta$ -D-ribofuranosyl)-1,2,4-triazole-3-carboxamide (14)**

$^{13}\text{C}$ -RMN (MeOH- $d_4$ , 75.5 MHz)

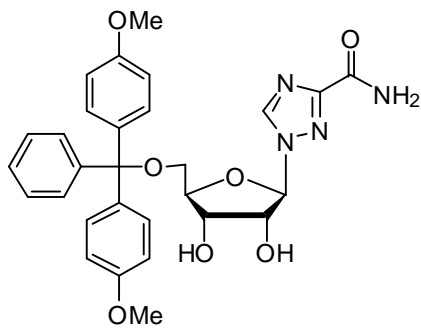

**14**

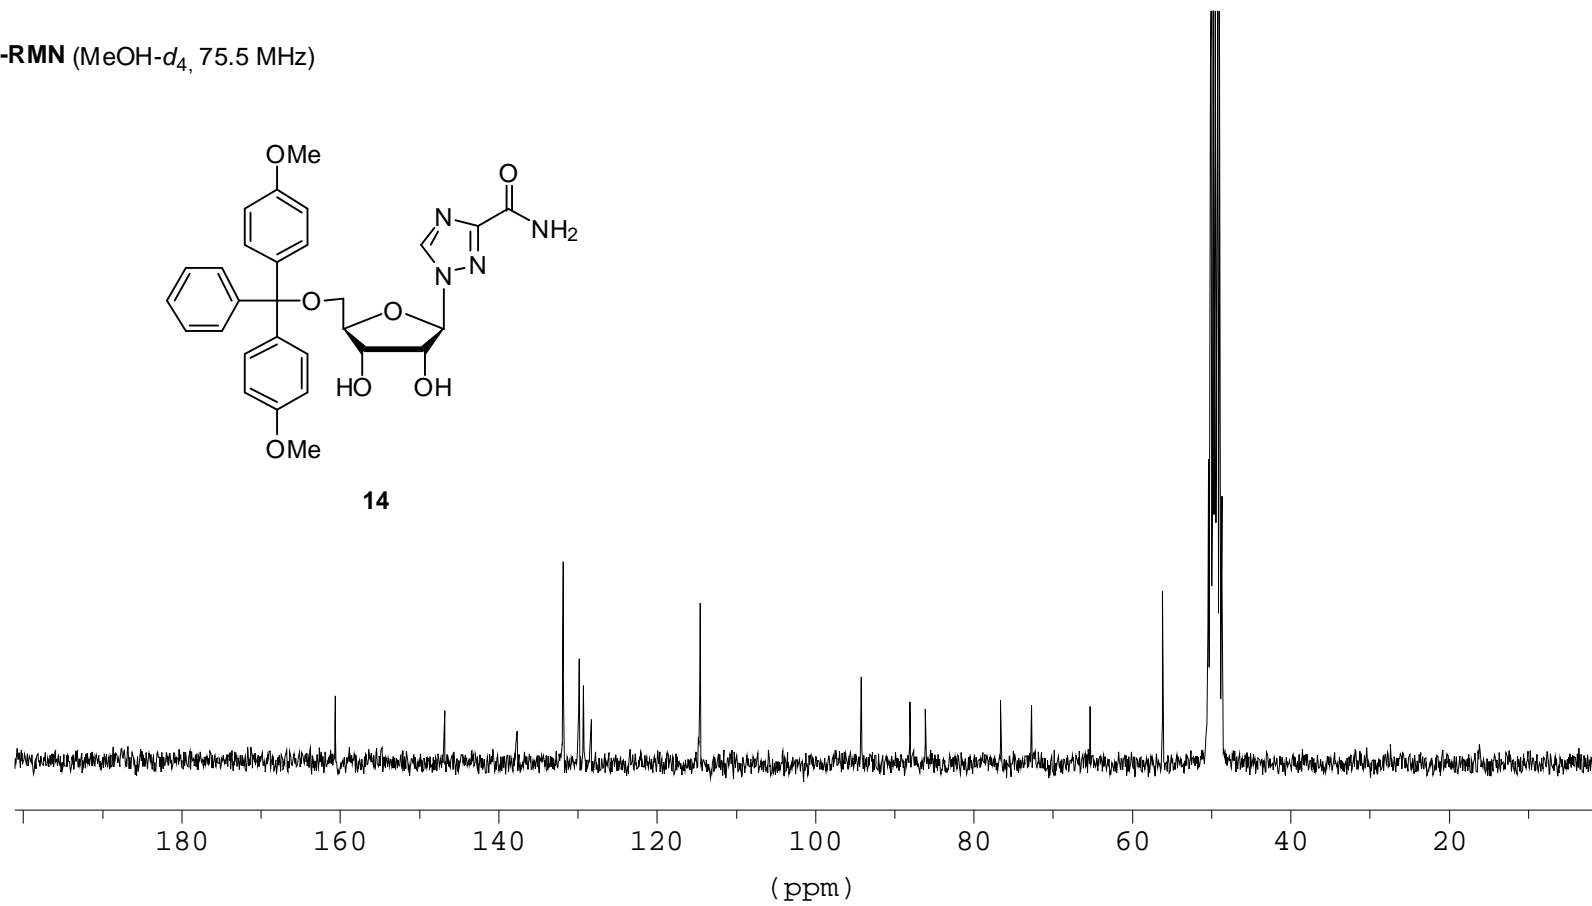

**1-(5'-*O*-dimethoxytrityl- $\beta$ -D-ribofuranosyl)-1,2,4-triazole-3-carboxamide (14)**

DEPT (MeOH- $d_4$ , 75.5 MHz)

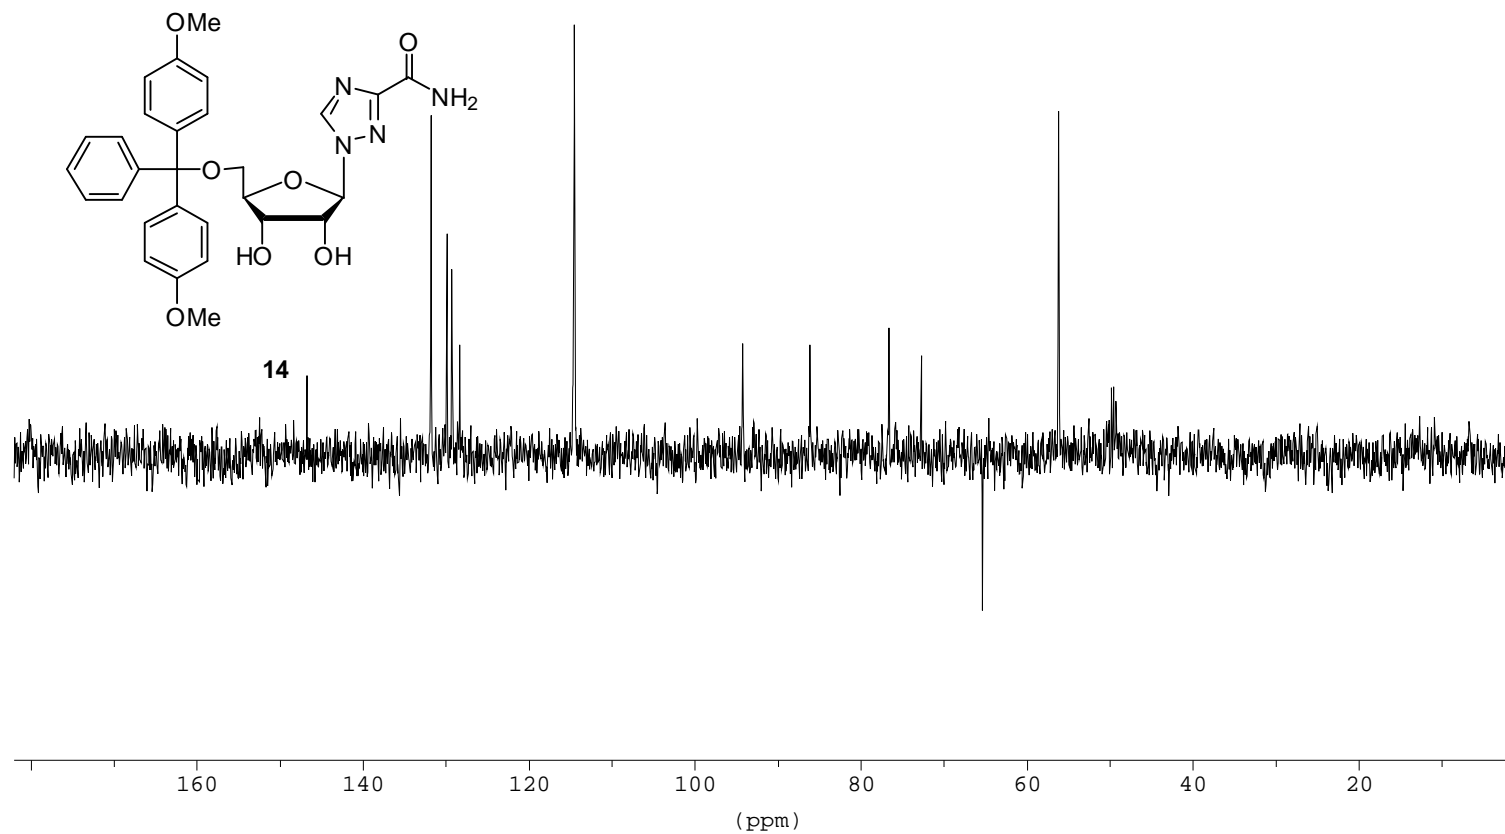

**1-(2',3'-di-*O*-acetyl-5'-*O*-dimethoxytrityl- $\beta$ -D-ribofuranosyl)-1,2,4-triazole-3-carboxamide (15).**

<sup>1</sup>H-RMN (MeOH-*d*<sub>4</sub>, 300 MHz)

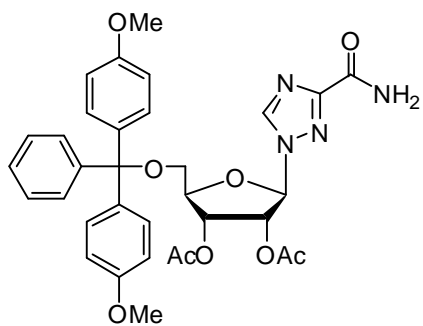

**15**

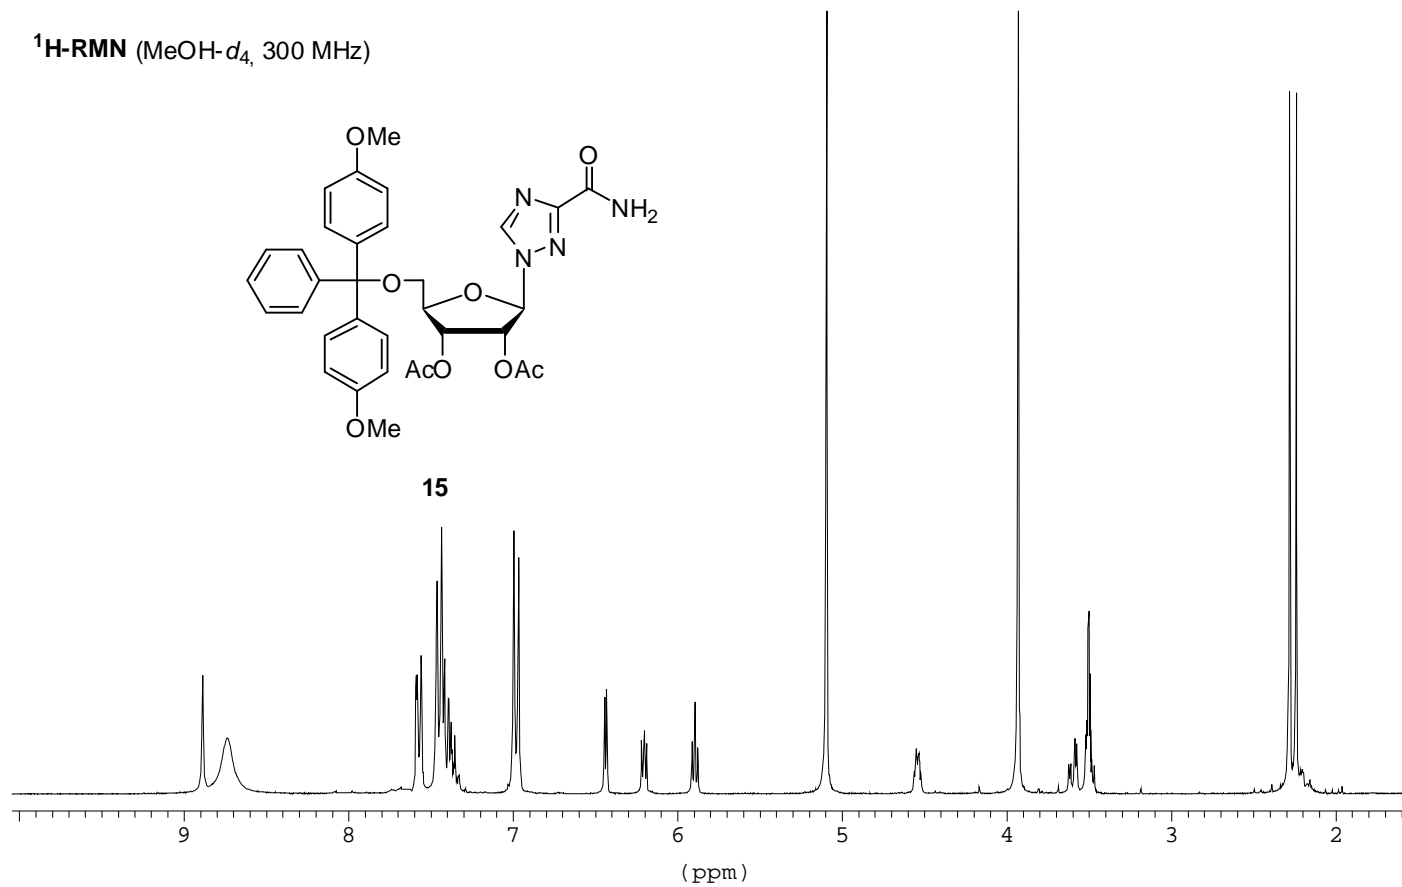



1-(2',3'-di-*O*-acetyl-5'-*O*-dimethoxytrityl- $\beta$ -D-ribofuranosyl)-1,2,4-triazole-3-carboxamide (15).

$^{13}\text{C}$ -RMN (MeOH- $d_4$ , 75.5 MHz)

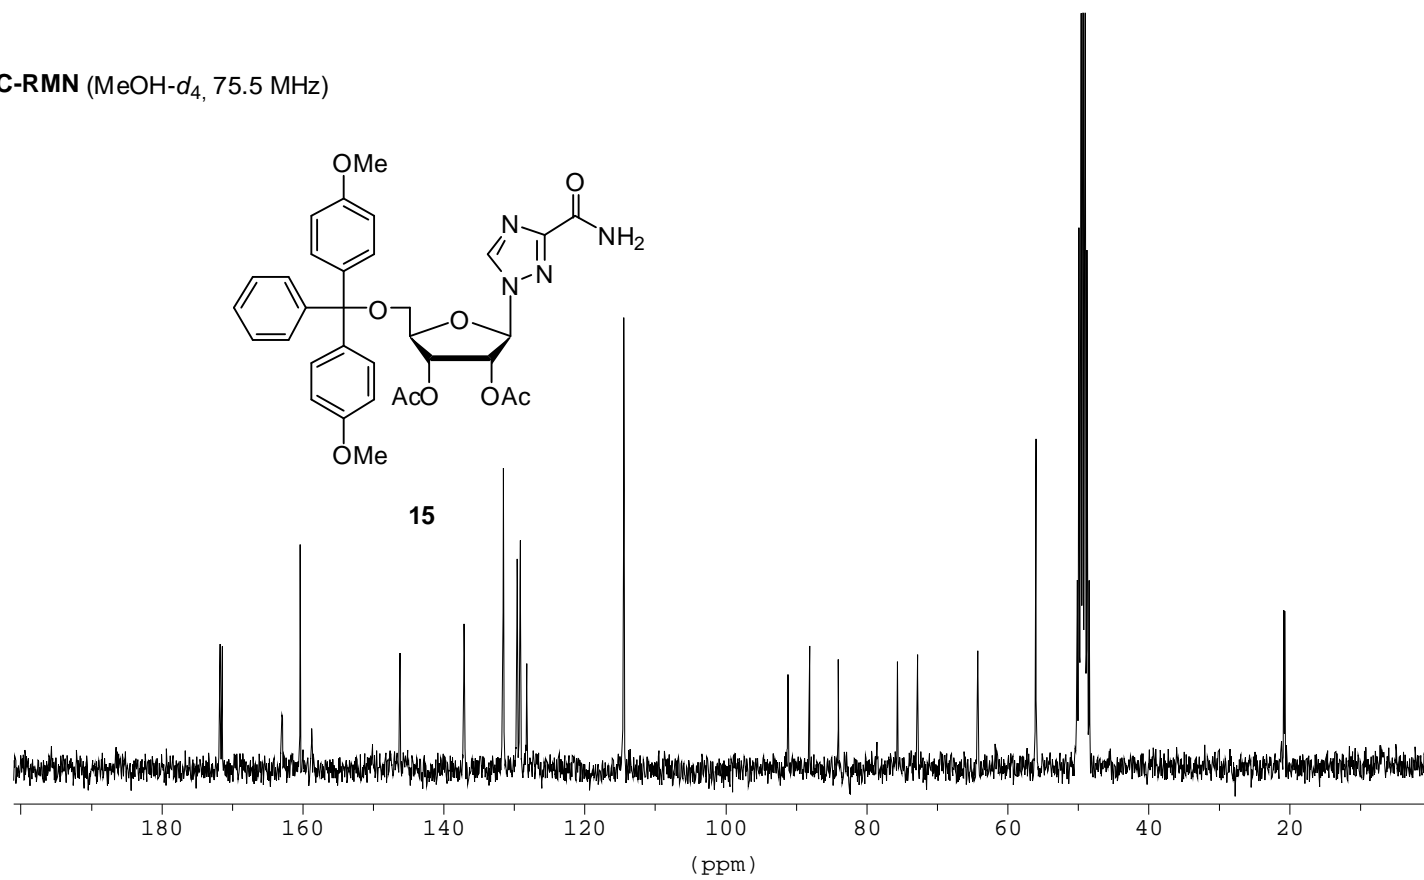

**1-(2',3'-di-*O*-acetyl-5'-*O*-dimethoxytrityl-β-D-ribofuranosyl)-1,2,4-triazole-3-carboxamide (15).**

DEPT (MeOH-*d*<sub>4</sub>, 75.5 MHz)

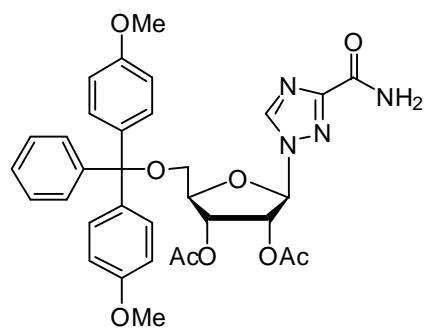

15

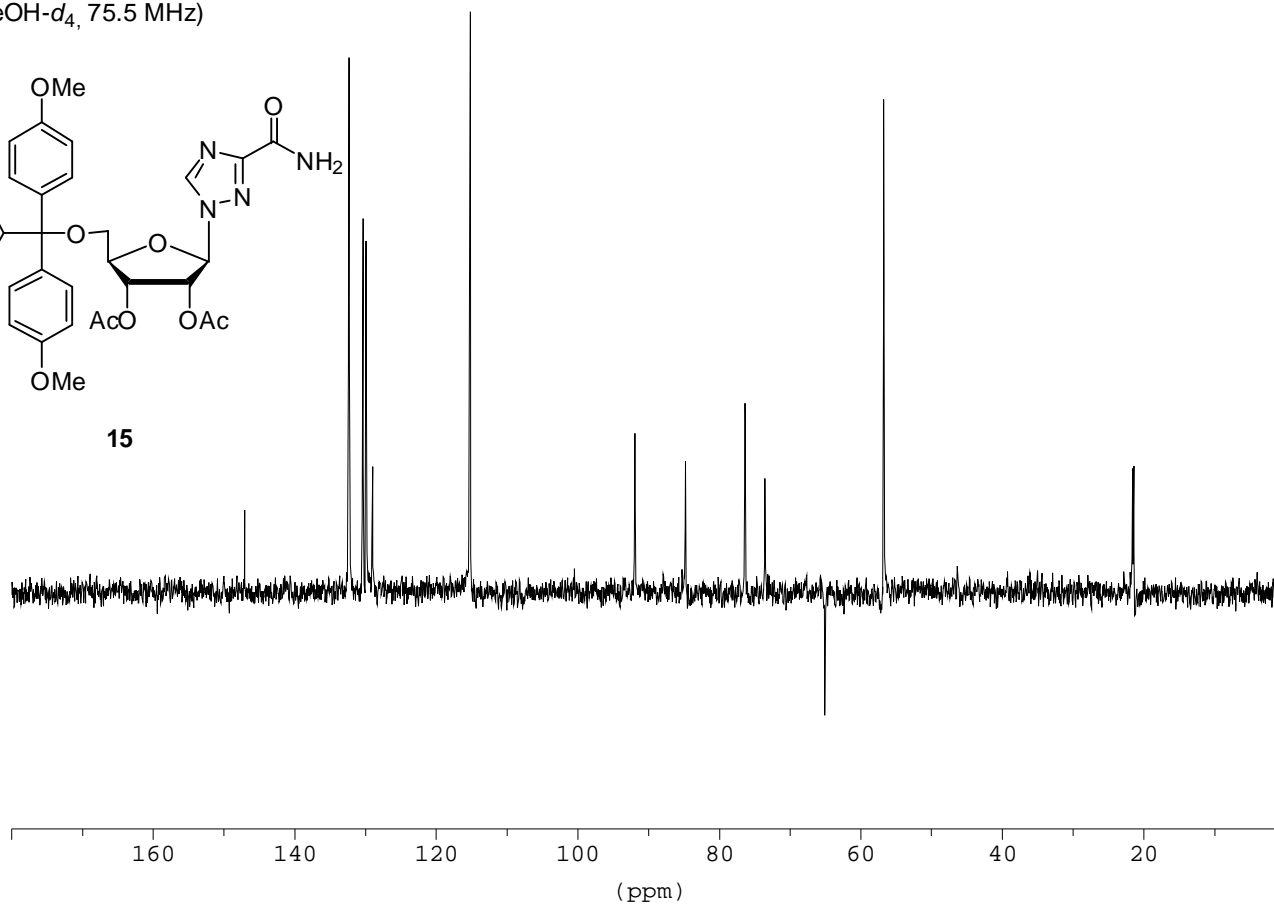

**9-( $\beta$ -D-arabinofuranosyl)- $N^6$ -benzoyladenine (17)**

**$^1\text{H-RMN}$**  (DMSO- $d_6$ , 300 MHz)

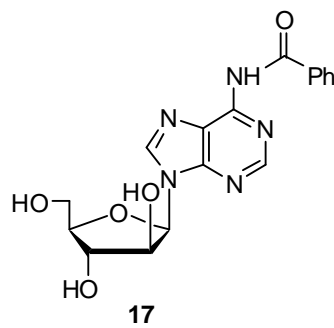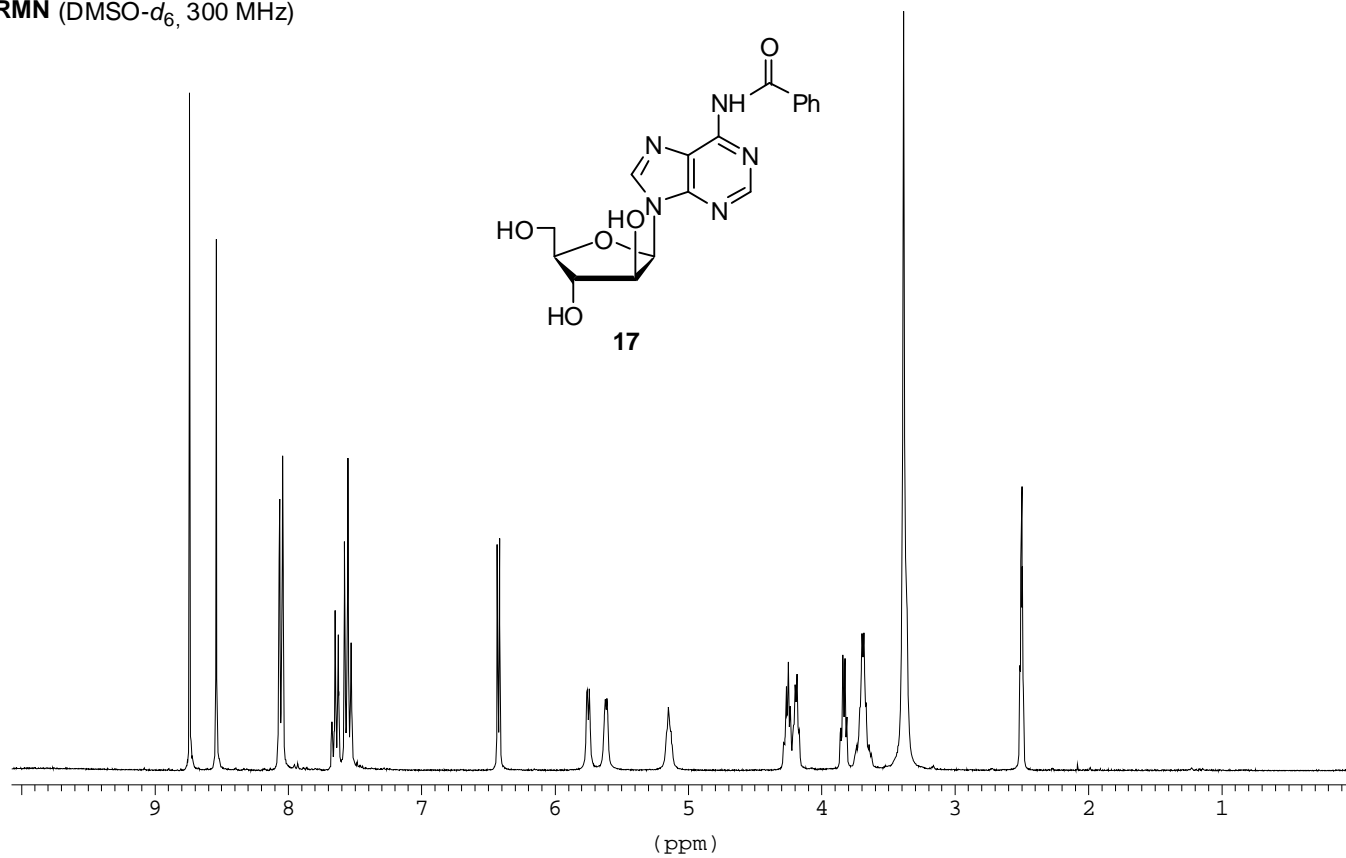

**9-( $\beta$ -D-arabinofuranosyl)- $N^6$ -benzoyladenine (17)**

$^{13}\text{C}$ -RMN (DMSO- $d_6$ , 75.5 MHz)

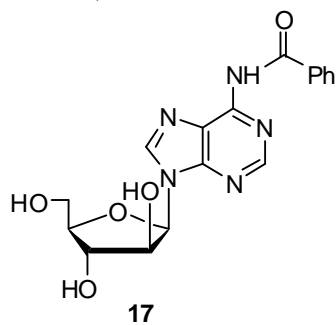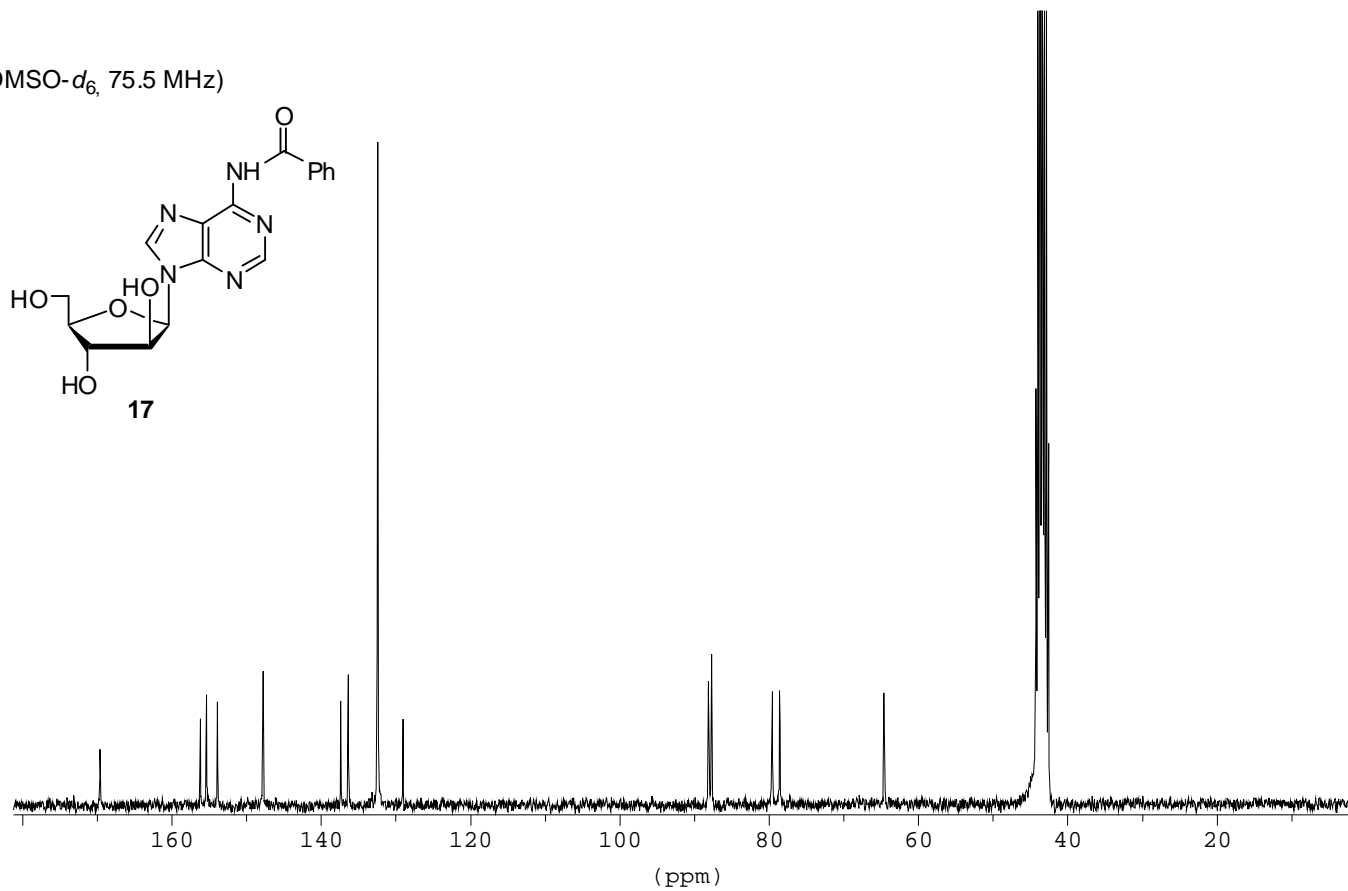

# 9-( $\beta$ -D-arabinofuranosyl)- $N^6$ -benzoyladenine (17)

DEPT(DMSO- $d_6$ , 75.5 MHz)

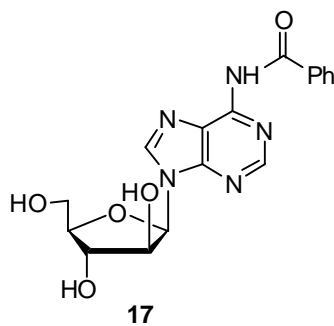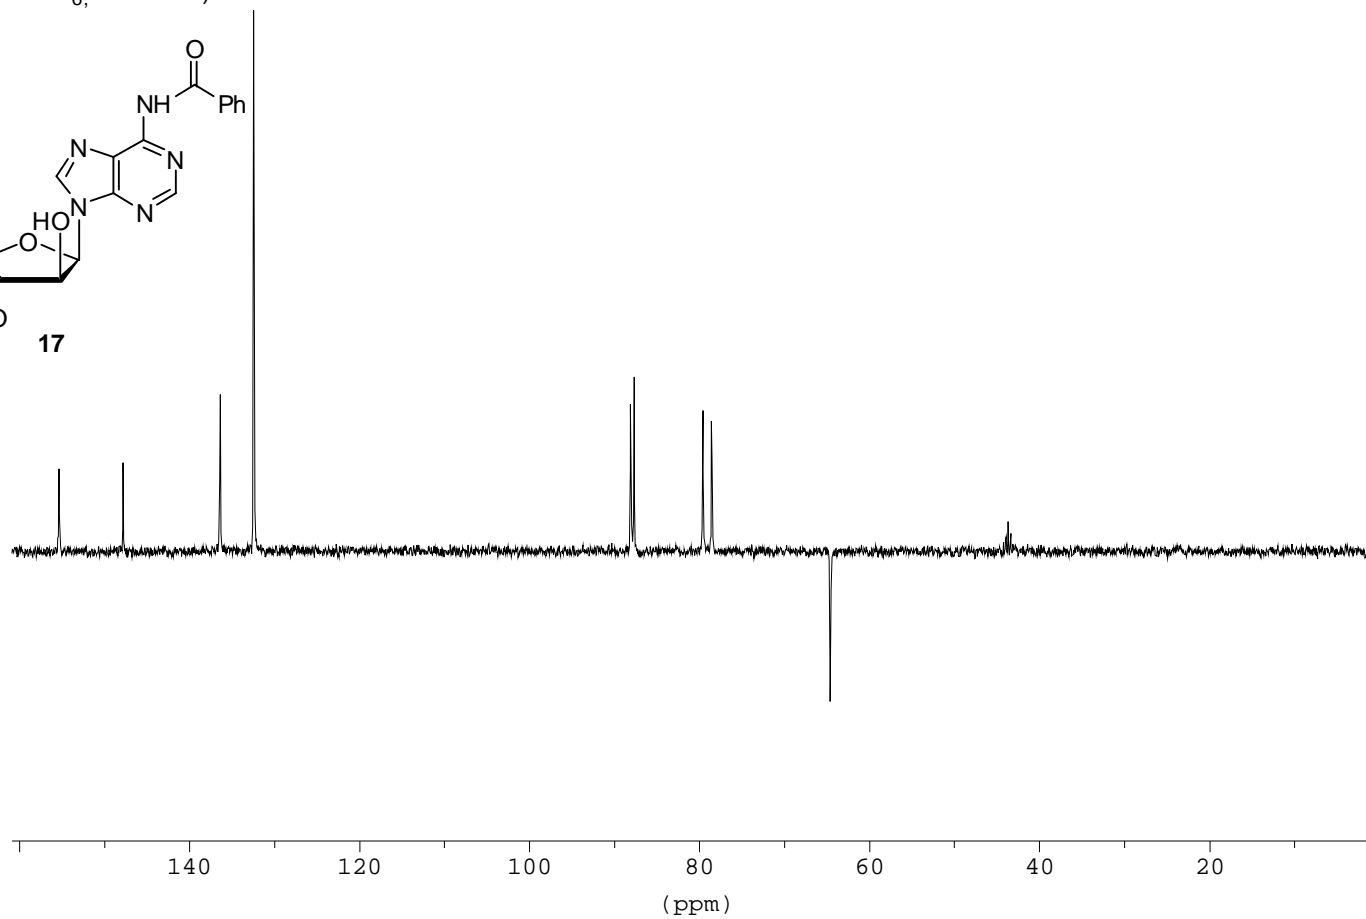

### Synthesis of *N*<sup>6</sup>-benzoyl-9-(5'-*O*-dimethoxytrityl-β-D-arabinofuranosyl)adenine (18)

<sup>1</sup>H-RMN (MeOH-*d*<sub>4</sub>, 300 MHz)

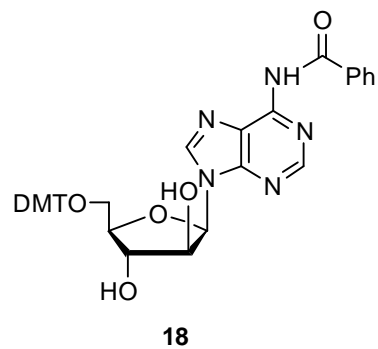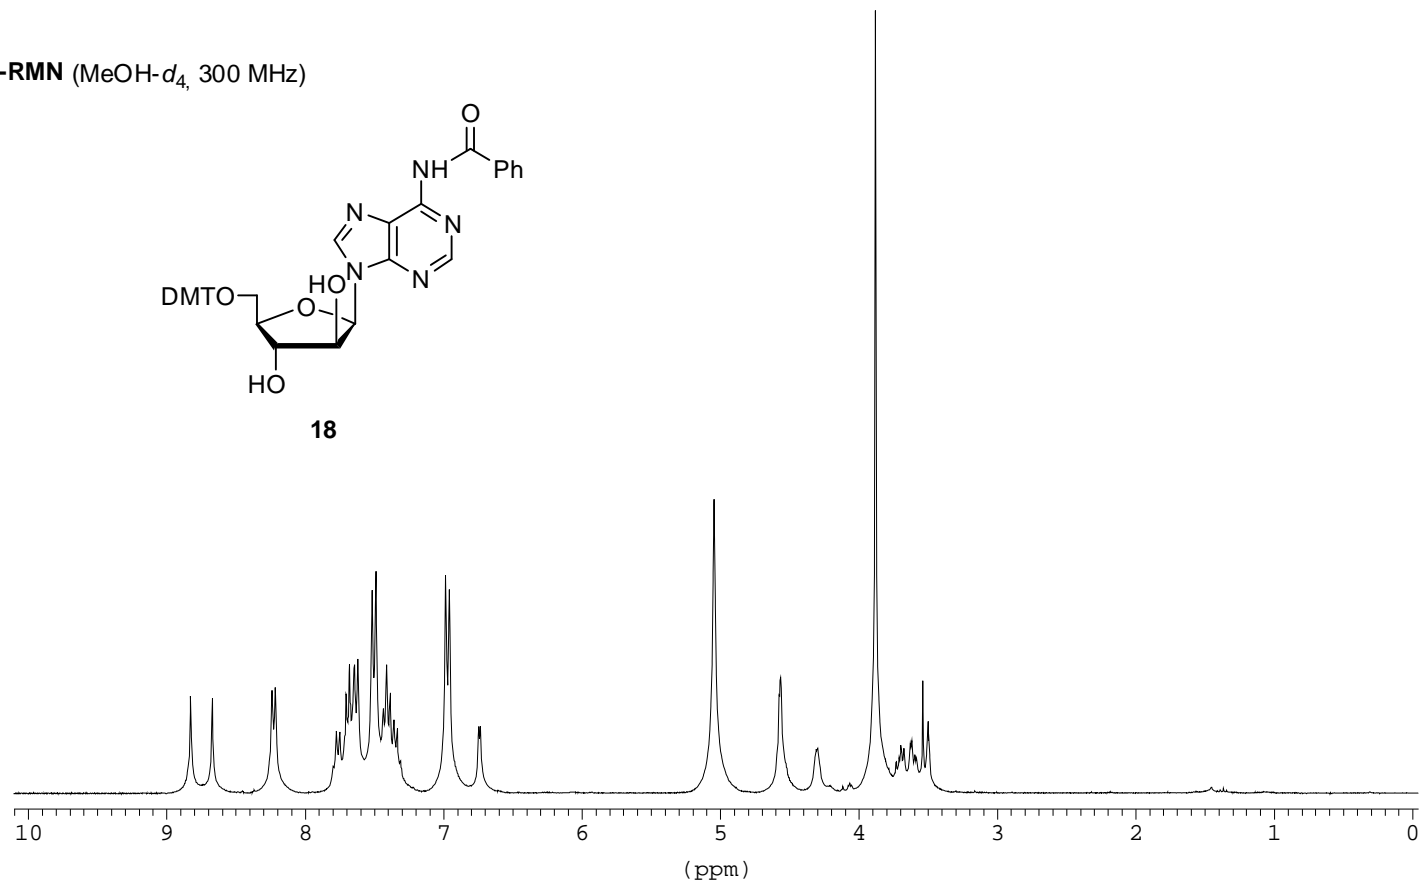

### Synthesis of *N*<sup>6</sup>-benzoyl-9-(5'-*O*-dimethoxytrityl-β-*D*-arabinofuranosyl)adenine (18)

<sup>13</sup>C-RMN (MeOH-*d*<sub>4</sub>, 75.5 MHz)

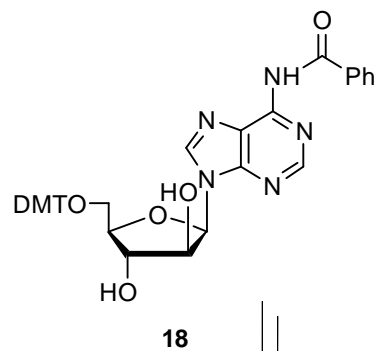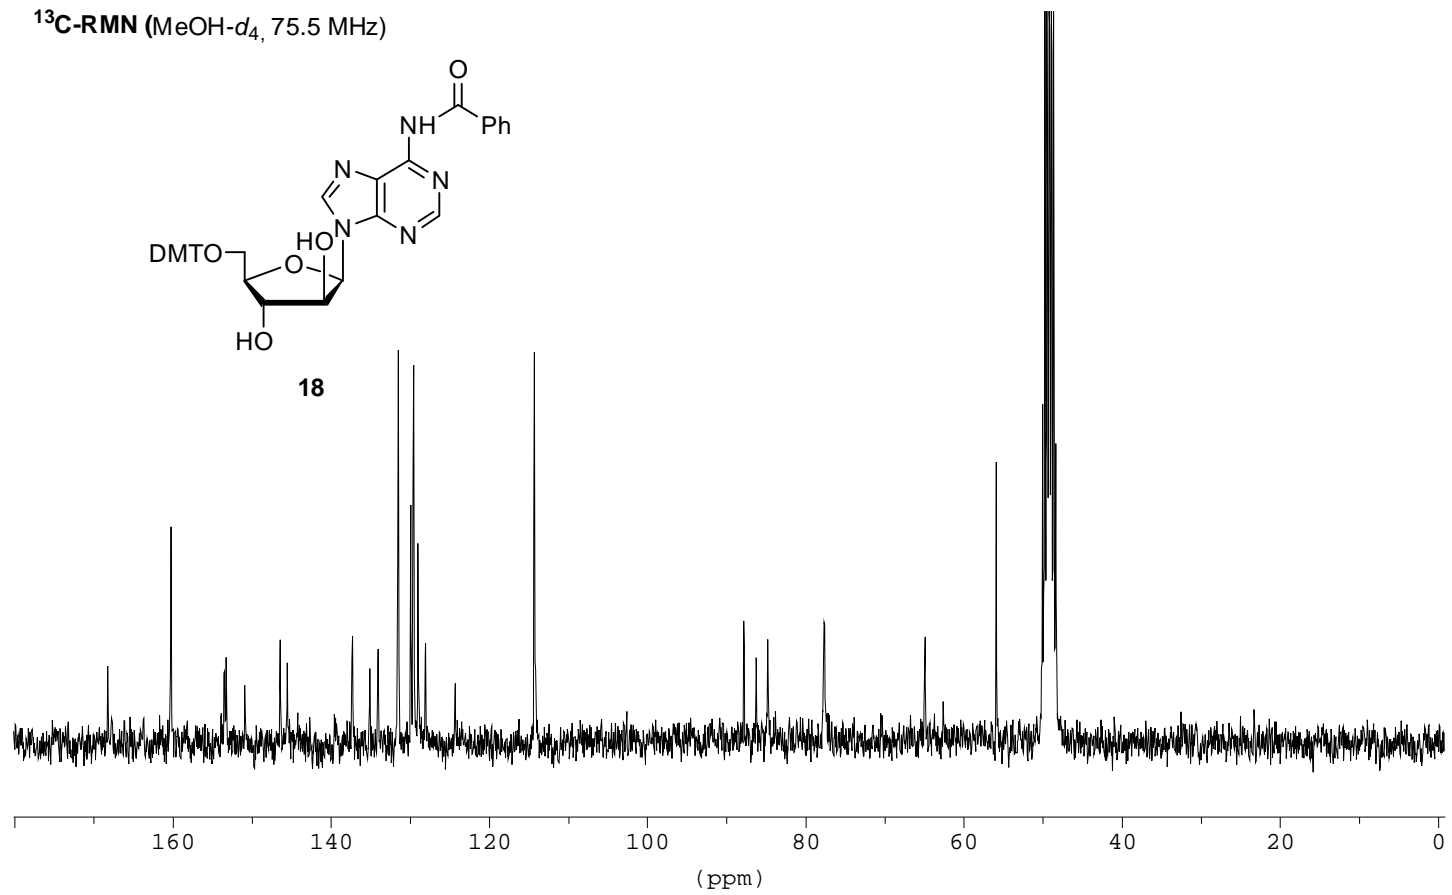

### Synthesis of *N*<sup>6</sup>-benzoyl-9-(5'-*O*-dimethoxytrityl-β-D-arabinofuranosyl)adenine (18)

DEPT (MeOH-*d*<sub>4</sub>, 75.5 MHz)

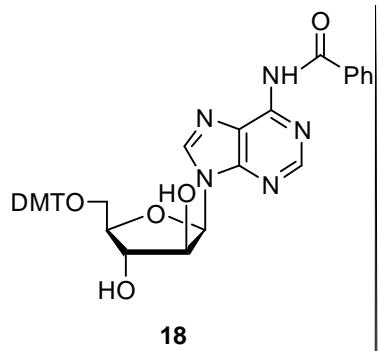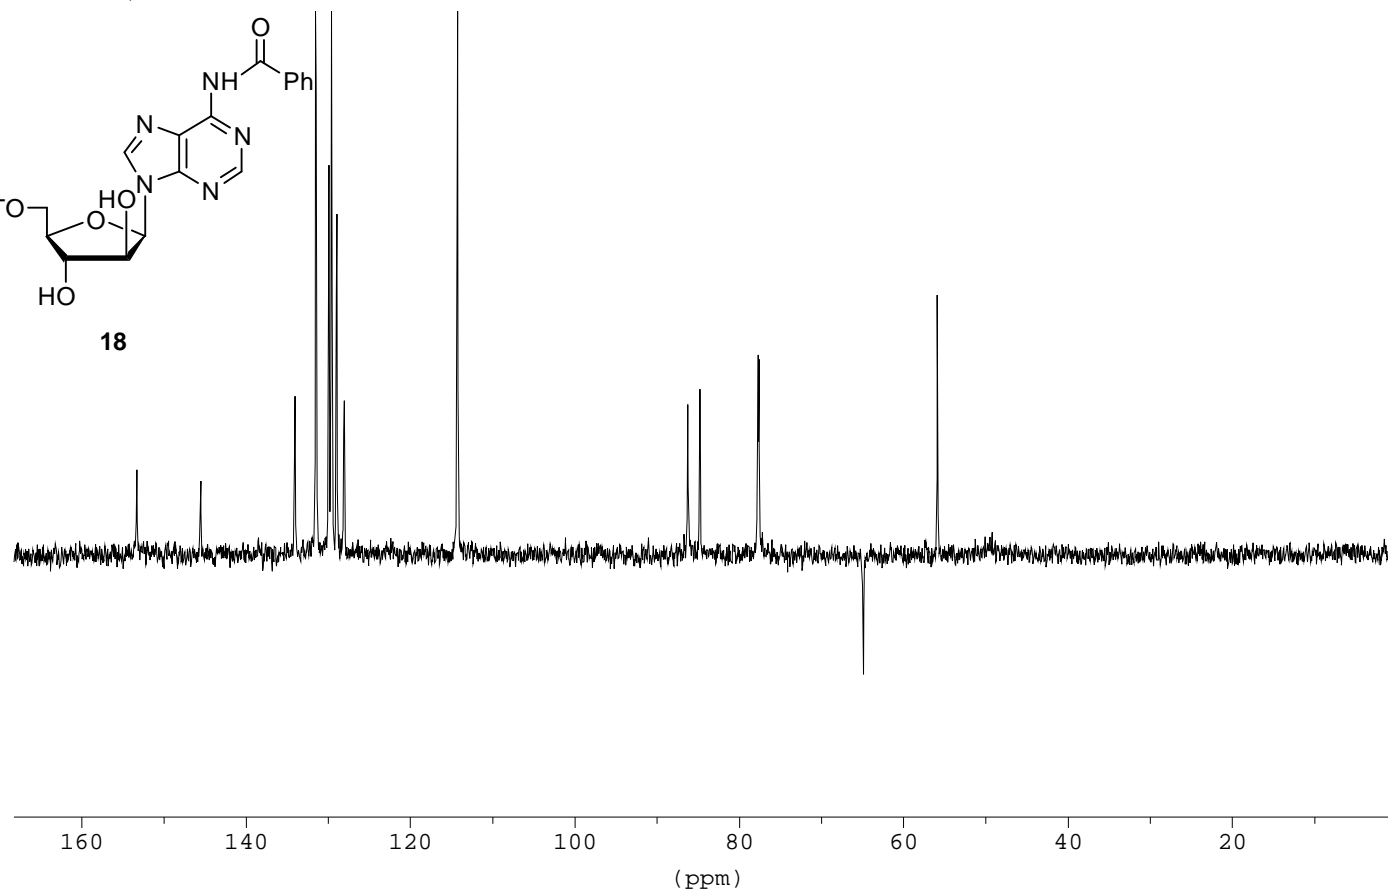



***N*<sup>6</sup>-benzoyl-9-(2',3'-di-*O*-acetyl-5'-*O*-dimethoxytrityl-β-*D*-arabinofuranosyl)adenine (19)**

<sup>1</sup>H-RMN (MeOH-*d*<sub>4</sub>, 300 MHz)

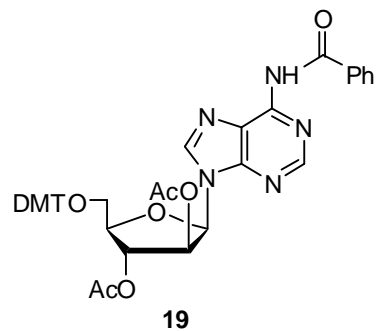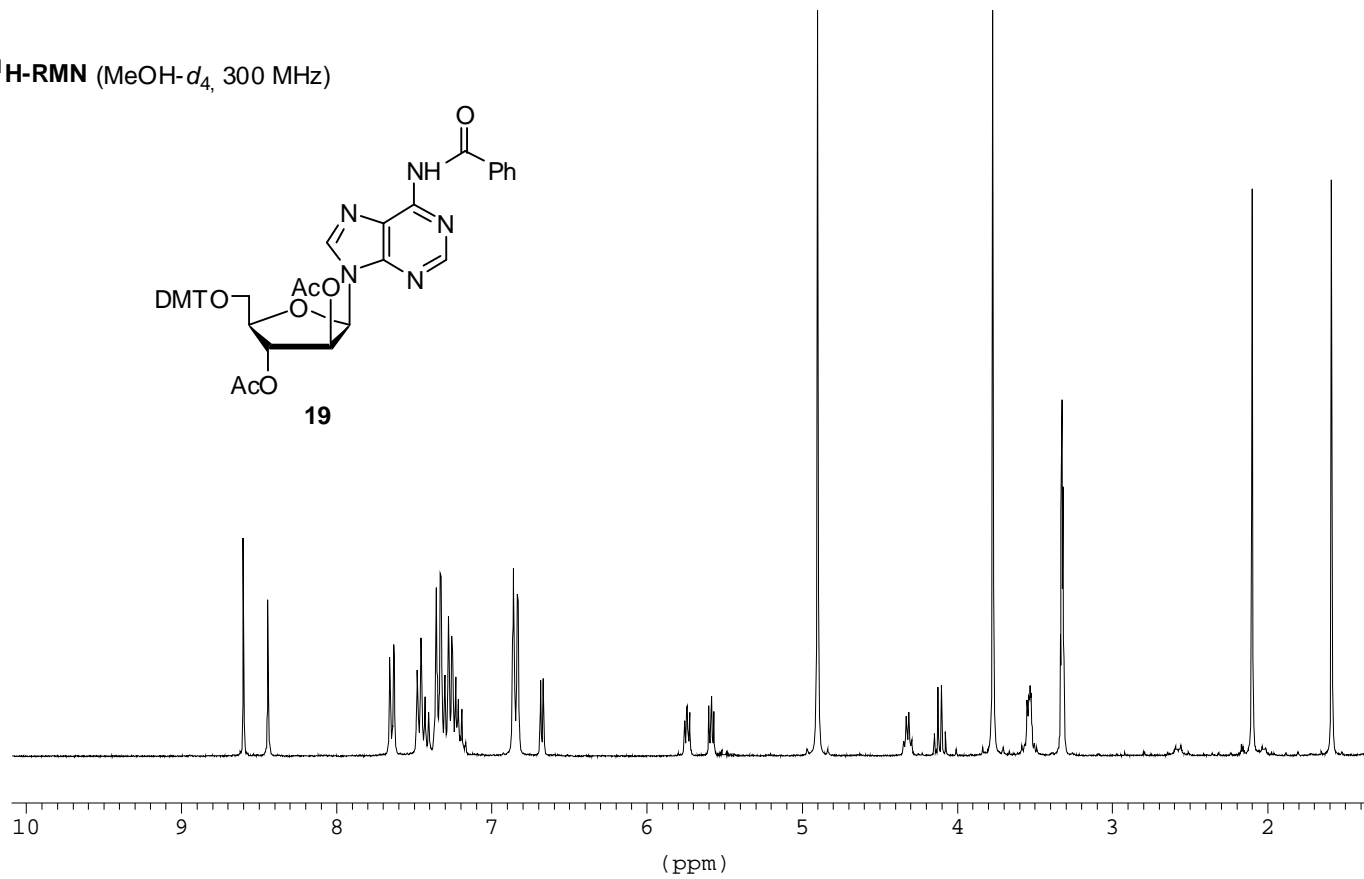

***N*<sup>6</sup>-benzoyl-9-(2',3'-di-*O*-acetyl-5'-*O*-dimethoxytrityl-β-D-arabinofuranosyl)adenine (19)**

<sup>13</sup>C-RMN (MeOH-*d*<sub>4</sub>, 75.5 MHz)

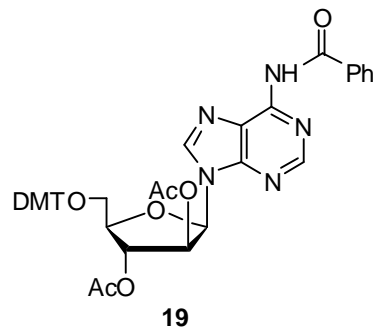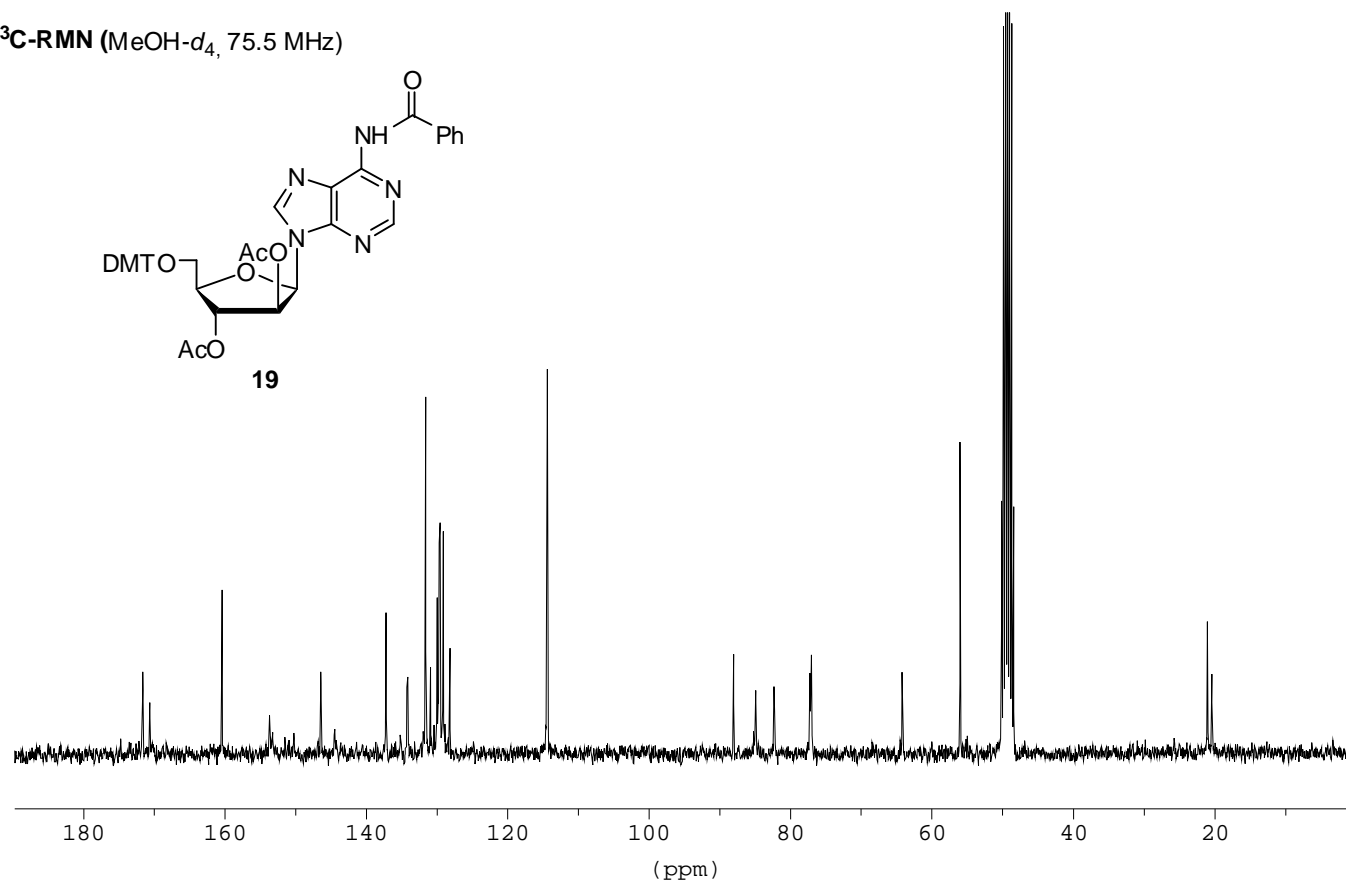

***N*<sup>6</sup>-benzoyl-9-(2',3'-di-*O*-acetyl-5'-*O*-dimethoxytrityl-β-D-arabinofuranosyl)adenine (19)**

DEPT (MeOH-*d*<sub>4</sub>, 75.5 MHz)

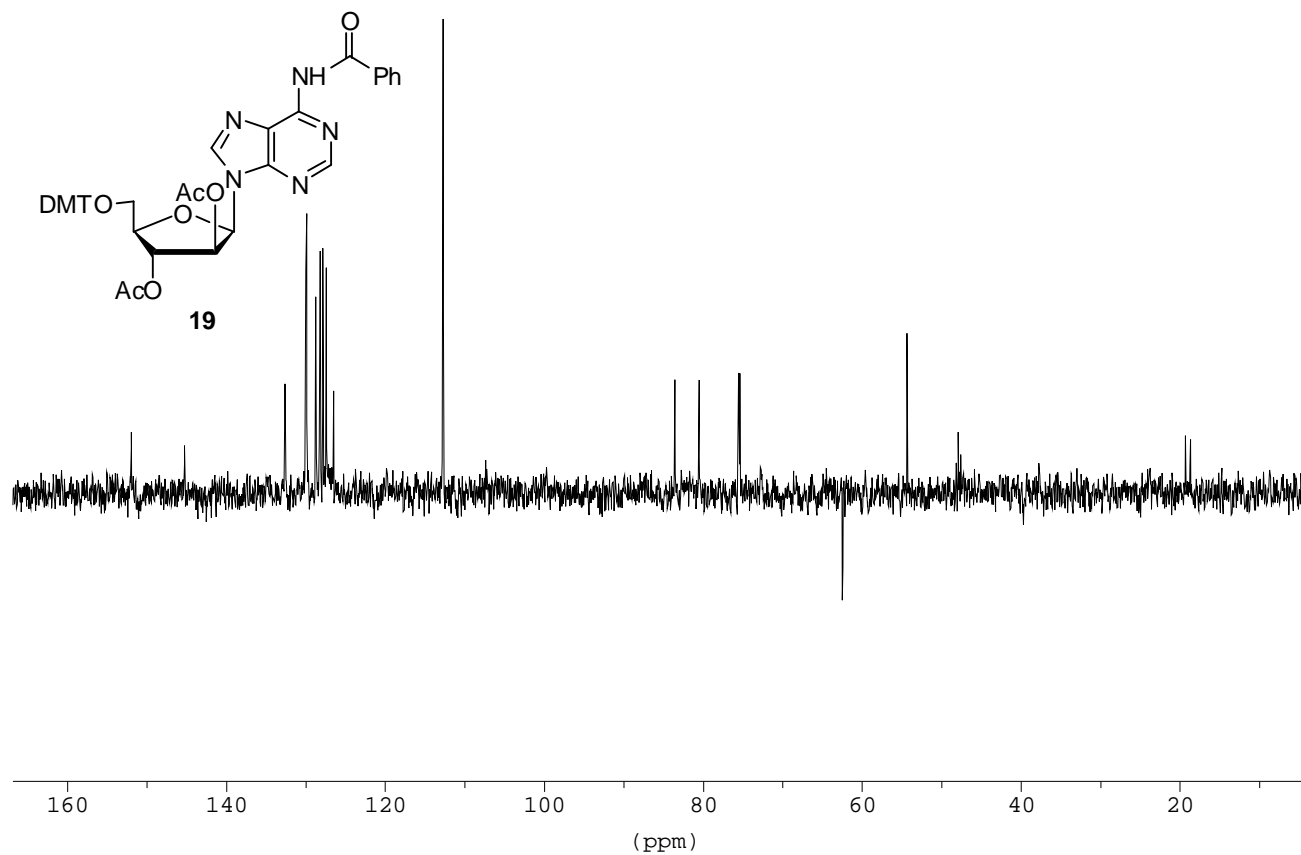

**1-(5'-*O*-*tert*-butyldimethylsilyl)- $\beta$ -D-arabinofuranosyl)cytosine (21)**

**<sup>1</sup>H-RMN** (MeOH-*d*<sub>4</sub>, 300 MHz)

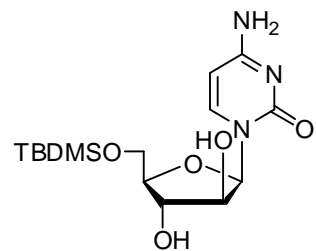

**21**

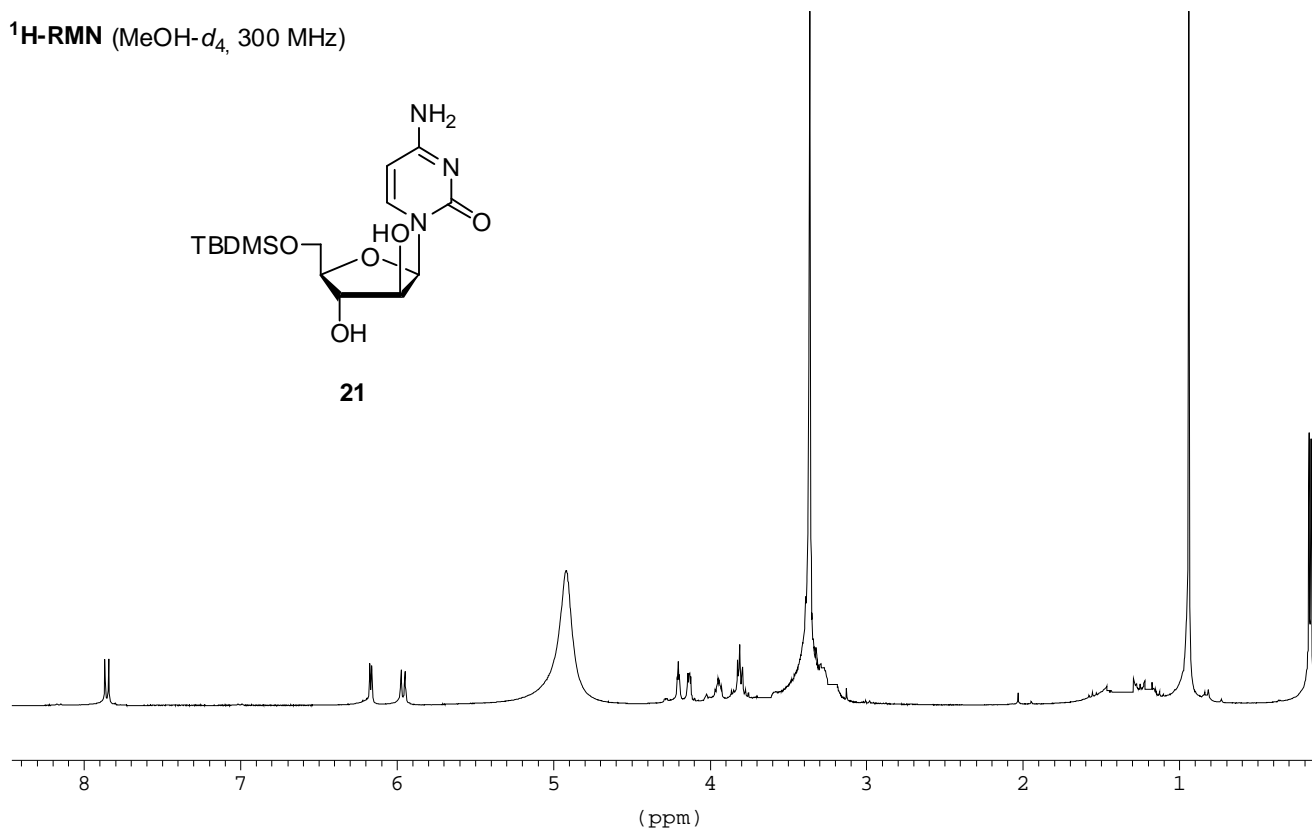

**1-(5'-*O*-*tert*-butyldimethylsilyl)- $\beta$ -D-arabinofuranosyl)cytosine (21)**

$^{13}\text{C}$ -RMN (MeOH- $d_4$ , 75.5 MHz)

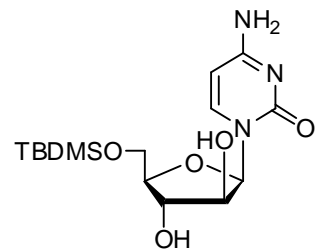

**21**

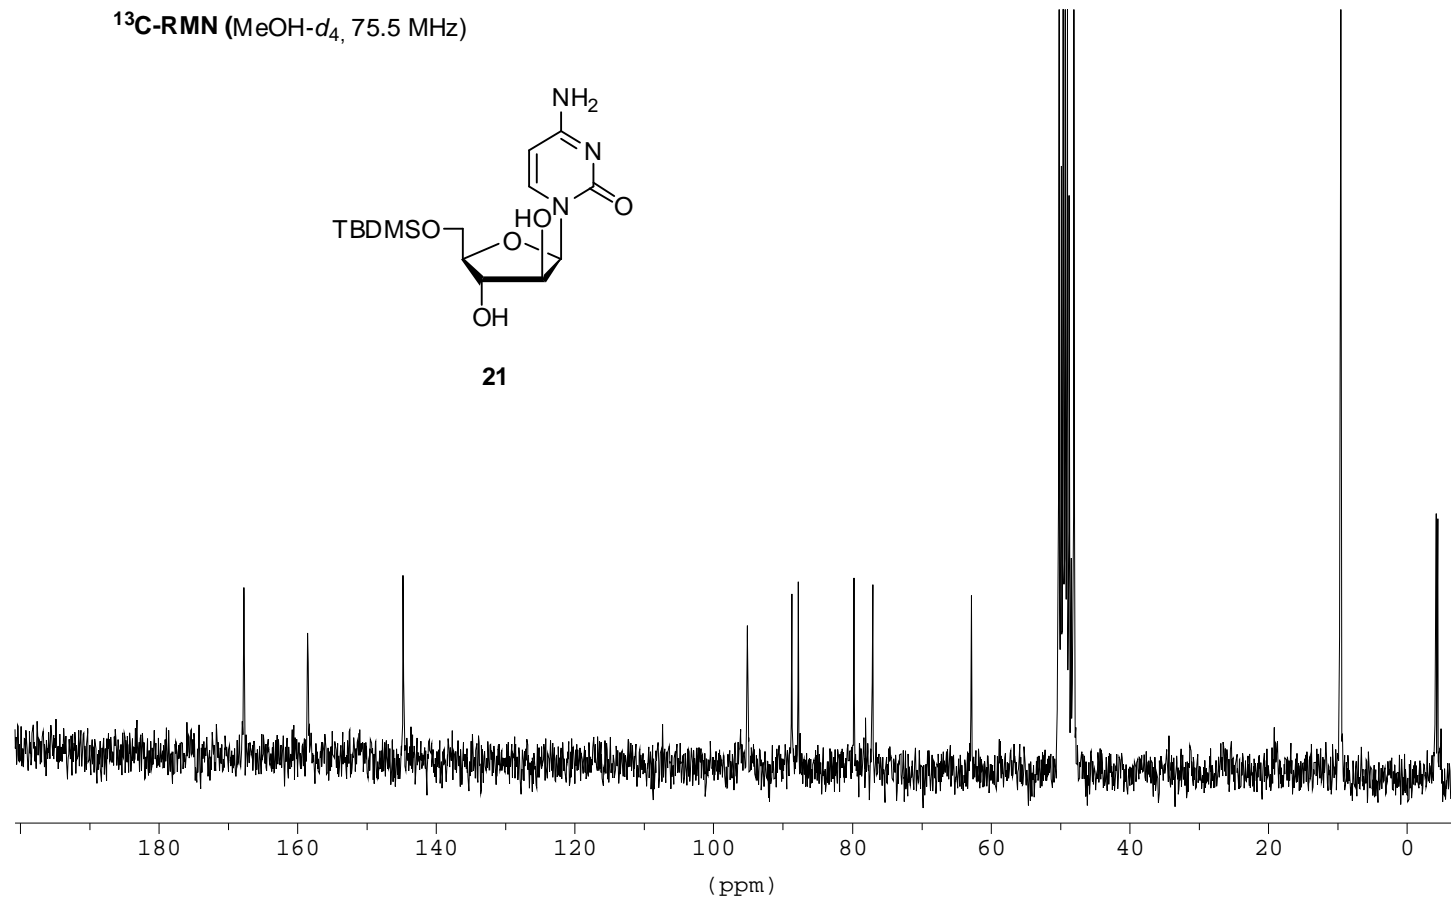

**1-(5'-*O*-*tert*-butyldimethylsilyl)- $\beta$ -D-arabinofuranosyl)cytosine (21)**

DEPT (MeOH-*d*<sub>4</sub>, 75.5 MHz)

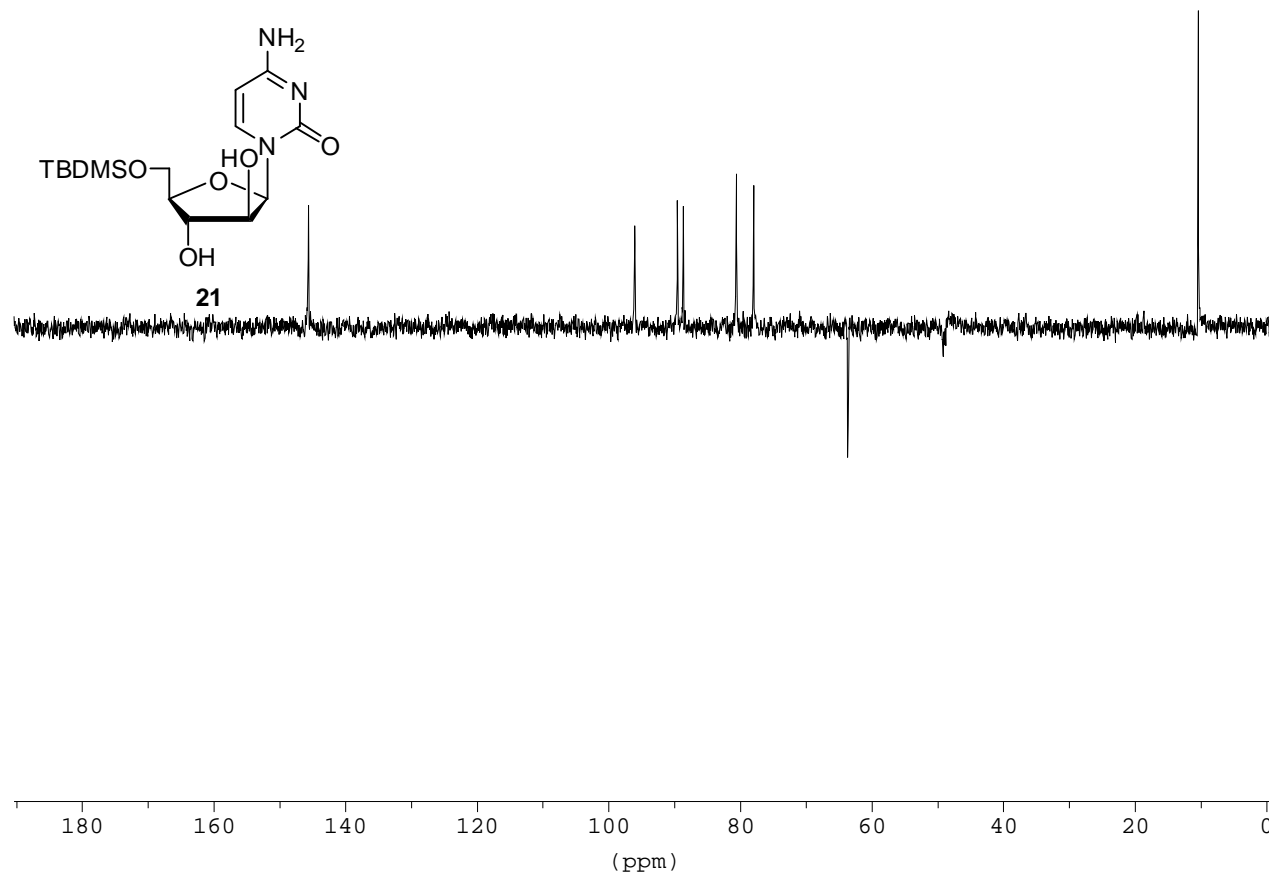

*N*<sup>4</sup>-acetyl-1-(2',3'-di-*O*-acetyl-5'-*O*-*tert*-butyldimethylsilyl)- $\beta$ -D-arabinofuranosyl)cytosine (22)

<sup>1</sup>H-RMN (CDCl<sub>3</sub>, 300 MHz)

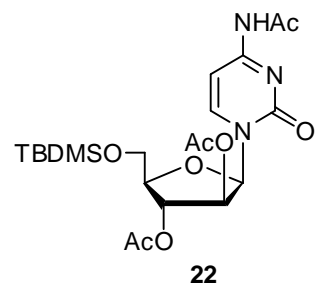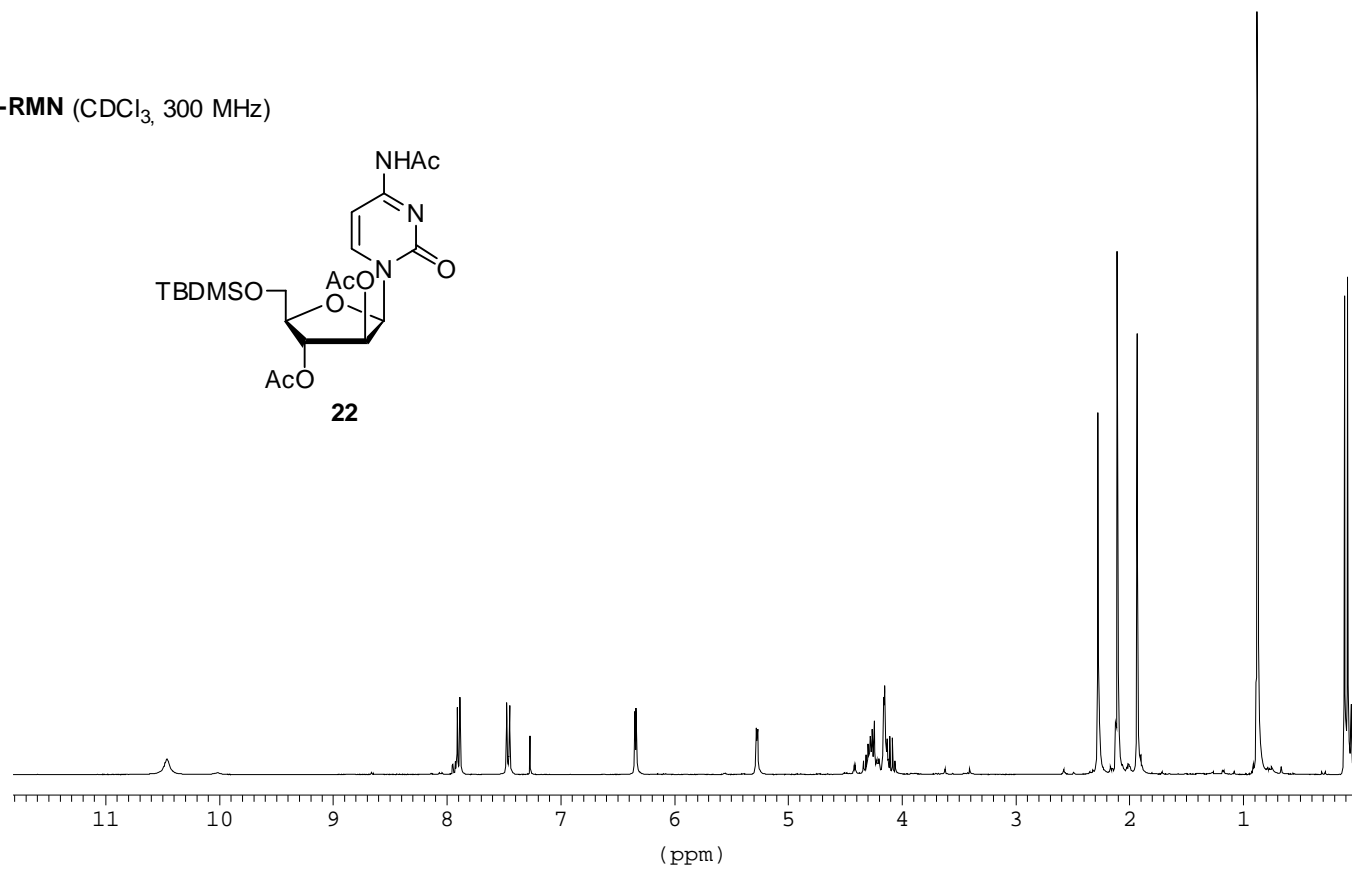

*N*<sup>4</sup>-acetyl-1-(2',3'-di-*O*-acetyl-5'-*O*-*tert*-butyldimethylsilyl)-β-D-arabinofuranosylcytosine (**22**)

<sup>13</sup>C-RMN (CDCl<sub>3</sub>, 75.5 MHz)

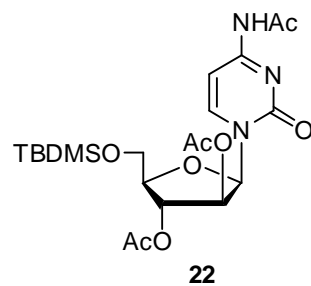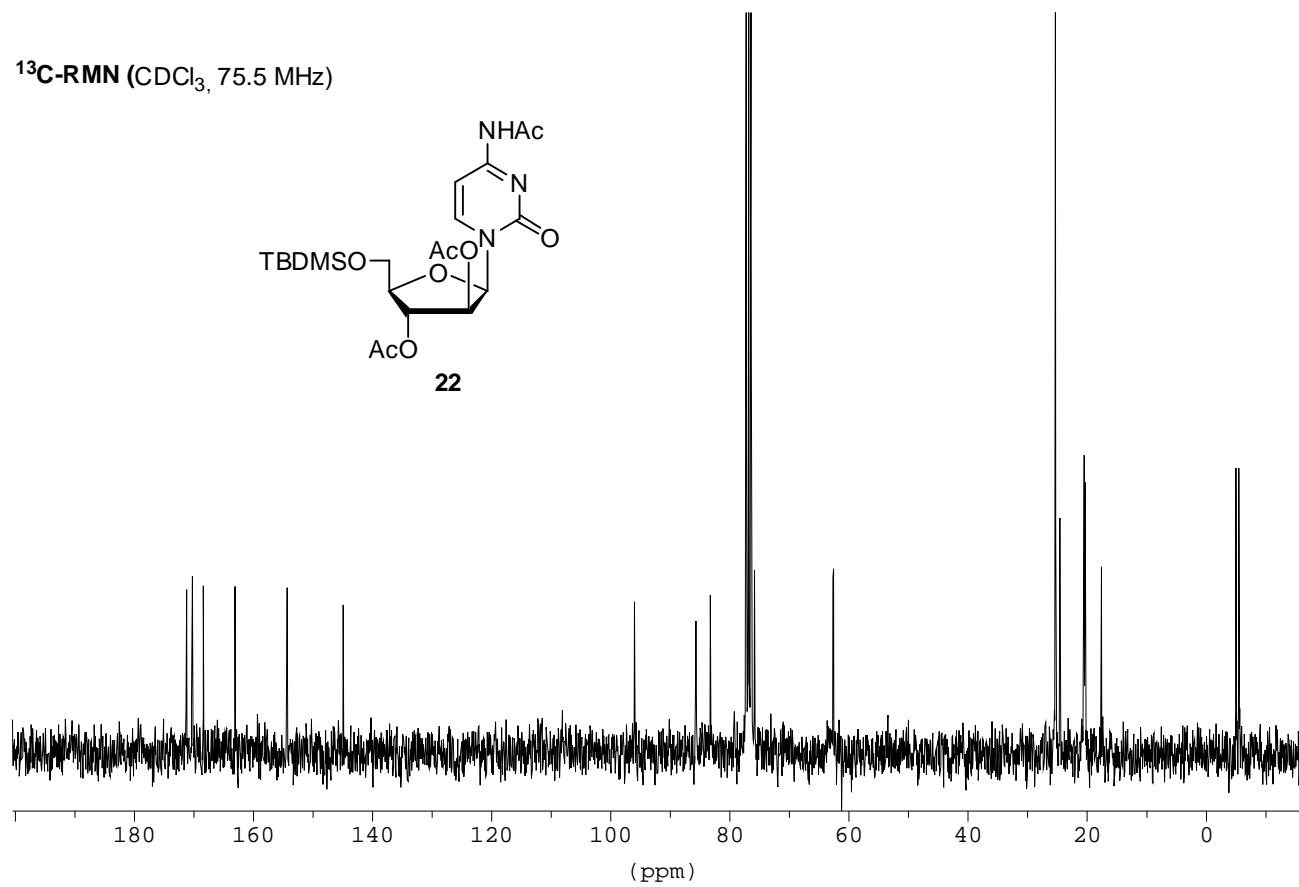



*N*<sup>4</sup>-acetyl-1-(2',3'-di-*O*-acetyl-5'-*O*-*tert*-butyldimethylsilyl)- $\beta$ -D-arabinofuranosyl)cytosine (**22**)

DEPT (CDCl<sub>3</sub>, 75.5 MHz)

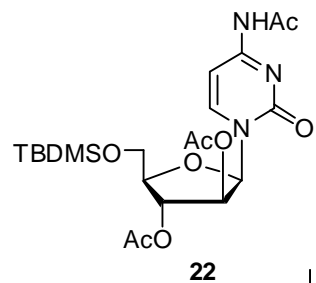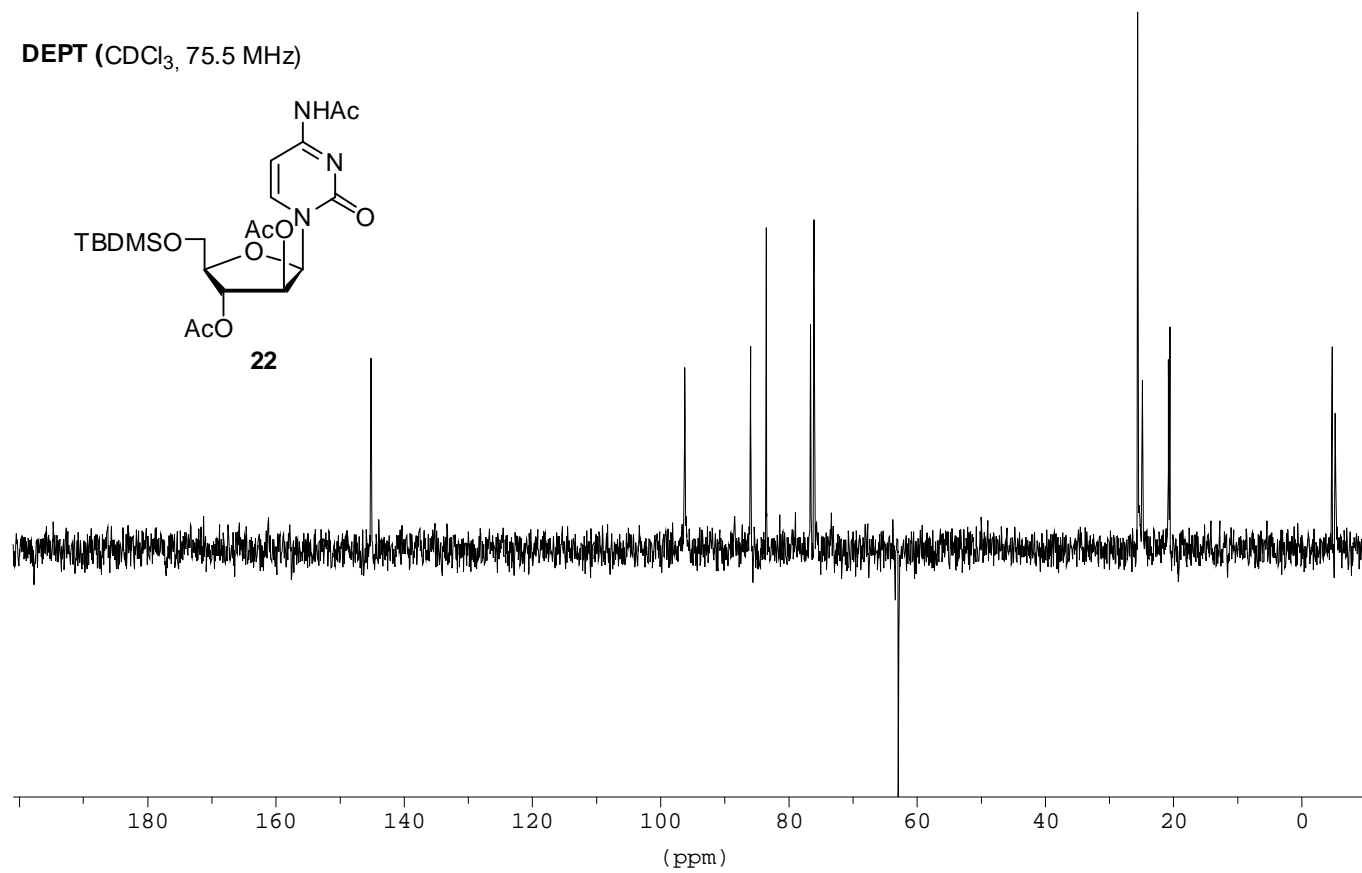

Supplement: NIHMS252862-supplement-1_si_001.pdf [file NIHMS252862-supplement-1_si_001.pdf]
